# Supplementary material for: Annulated carbamates are precursors for the ring contraction of the adamantane framework
Source: Royal Society of Chemistry journal article supplement (doi:10.1039/d2ra06402b), 2022-01-01
Supplement: d2ra06402b1.pdf [file d2ra06402b1.pdf]

## Supporting Information

### **Annulated carbamates are precursors for the ring-contraction of the adamantane framework**

Radim Hrdina,<sup>\*a</sup> Oksana M. Holovko-Kamoshenkova,<sup>a,d</sup> Ivana Císařová,<sup>b</sup> Filip Koucký,<sup>b</sup> Oldřich Machalický<sup>c</sup>

## Content

|                                                                        |           |
|------------------------------------------------------------------------|-----------|
| 1. General information                                                 | S3        |
| 2. Experimental part                                                   | S4        |
| 2.1. Preparation and characterization of starting materials <b>3-4</b> | S4        |
| 2.1.1 Compound <b>3a</b>                                               | S4        |
| 2.1.2 Compound <b>3b</b>                                               | S4        |
| 2.1.3 Compound <b>3c</b>                                               | S5        |
| 2.1.4 Compound <b>3d</b>                                               | S5        |
| 2.1.5 Compound <b>3e</b>                                               | S6        |
| 2.1.6 Compound <b>4aa</b>                                              | S6        |
| 2.1.7 Compound <b>4ab</b>                                              | S7        |
| 2.1.8 Compound <b>4bb</b>                                              | S8        |
| 2.1.9 Compound <b>4cb</b>                                              | S8-S9     |
| 2.1.10 Compound <b>4db</b>                                             | S9-S10    |
| 2.1.11 Compound <b>4ea</b>                                             | S10       |
| 2.1.12 Compound <b>4eb</b>                                             | S10-S11   |
| 2.2. Preparation and characterisation of compounds <b>5-26</b>         | S12       |
| 2.2.1 Compound <b>5</b>                                                | S12       |
| 2.2.2 Compound <b>6</b>                                                | S12-S13   |
| 2.2.3 Compound <b>7</b>                                                | S13-14    |
| 2.2.4 Compound <b>8</b>                                                | S14       |
| 2.2.5 Compound <b>9</b>                                                | S15       |
| 2.2.6 Compound <b>10-I1</b>                                            | S15-S16   |
| 2.2.7 Compound <b>10-I2</b>                                            | S16       |
| 2.2.8 Compound <b>11</b>                                               | S17       |
| 2.2.9 Compound <b>12</b>                                               | S17-S18   |
| 2.2.10 Compound <b>13</b>                                              | S18-S19   |
| 2.2.11 Compound <b>14</b>                                              | S19       |
| 2.2.12 Compound <b>15</b>                                              | S20       |
| 2.2.13 Compound <b>16</b>                                              | S21       |
| 2.2.14 Compound <b>17</b>                                              | S21-S22   |
| 2.2.15 Compound <b>18</b>                                              | S22       |
| 2.2.16 Compound <b>19</b>                                              | S22-S23   |
| 2.2.17 Compound <b>23</b>                                              | S23       |
| 2.2.18 Compound <b>24</b>                                              | S24       |
| 2.2.19 Compound <b>25</b>                                              | S24-S25   |
| 2.2.20 Compound <b>26</b>                                              | S25       |
| 3. Kinetic studies                                                     | S25-76    |
| 4. NMR spectra of compounds <b>3-26</b>                                | S77-138   |
| 5. DFT analyses                                                        | S139-S143 |
| 6. Crystallographic data collection and refinement details             | S144-S146 |

## 1. General information

NMR spectra were recorded on 400 or 600 MHz machine at RT (25 °C) unless otherwise stated.  $^1\text{H}$ -NMR chemical shifts are given in ppm relative to  $\text{Me}_4\text{Si}$  with the solvent resonance used as the internal standard ( $\text{CDCl}_3$   $\delta$  = 7.26 ppm).  $^{13}\text{C}$ -NMR (60, 101 or 150 MHz) chemical shifts are given in ppm relative to  $\text{Me}_4\text{Si}$  with the solvent resonance used as the internal standard ( $\text{CDCl}_3$  = 77.16 ppm). IR spectra were recorded using an ATR sampler and are reported in wave numbers ( $\text{cm}^{-1}$ ). Melting points (m.p.) were measured in open capillary tubes and are uncorrected. All reactions involving air sensitive compounds were carried out under dry and inert atmosphere ( $\text{N}_2$  or argon) by means of an inert gas/vacuum double manifold line and standard Schlenk techniques. High resolution mass spectra were recorded with Bruker Micro TOF LC.

## 2. Experimental procedures

### 2.1 Preparation and characterization of starting materials **3-4**.

#### 2.1.1 Compound **3a**

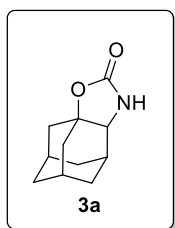

**<sup>1</sup>H NMR** (400 MHz, CDCl<sub>3</sub>): δ/ppm = 1.57-1.87 (m, 7H), 1.99-2.02 (m, 1H), 2.06-2.16 (m, 3H), 2.27 (m, 2H), 3.65 (m, 1H), 5.71 (bs, 1H)

**<sup>13</sup>C NMR** (101 MHz, CDCl<sub>3</sub>): δ/ppm = 29.1 (CH<sub>2</sub>), 29.2 (CH), 31.1 (CH), 31.2 (CH), 36.3 (CH<sub>2</sub>), 36.4 (CH<sub>2</sub>), 37.2 (CH<sub>2</sub>), 40.1 (CH<sub>2</sub>), 64.1 (CH), 80.6 (C), 161.4 (C).

Compound **3a** was prepared in two steps from adamantan-1-ol according to the procedure described in Hrdina, R.; Larrosa, M.; Logemann, C. *J. Org. Chem.* **2017**, 82, 4891–4899.

#### 2.1.2 Compound **3b**

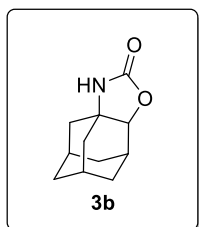

**<sup>1</sup>H NMR** (400 MHz, CDCl<sub>3</sub>): δ/ppm = 1.57-1.77 (m, 5H), 1.86-1.96 (m, 5H), 2.05 (m, 1H), 2.13 (m, 1H), 2.43 (m, 1H), 4.13 (d, *J* = 4 Hz, 1H), 5.48 (bs, 1H).

**<sup>13</sup>C NMR** (101 MHz, CDCl<sub>3</sub>): δ/ppm = 27.9 (CH), 29.6 (CH<sub>2</sub>), 29.7 (CH), 30.3 (CH), 36.0 (CH<sub>2</sub>), 36.4 (CH<sub>2</sub>), 39.5 (CH<sub>2</sub>), 39.7 (CH<sub>2</sub>), 56.7 (C), 85.5 (CH), 161.1 (C).

Compound **3b** was prepared in two steps from adamantan-2-ol according to the procedure described in Hrdina, R.; Larrosa, M.; Logemann, C. *J. Org. Chem.* **2017**, 82, 4891–4899.



### 2.1.3 Compound 3c

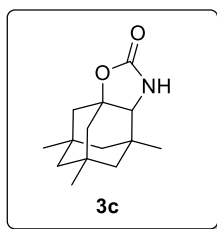

**<sup>1</sup>H NMR** (400 MHz, CDCl<sub>3</sub>):  $\delta$ /ppm = 0.90 (s, 3H), 0.92 (s, 3H), 0.94 (s, 3H), 0.98-1.02 (m, 1H), 1.08-1.19 (m, 3H), 1.20-1.27 (m, 1H), 1.36-1.40 (m, 1H), 1.43-1.48 (m, 1H), 1.68-1.77 (m, 3H), 3.19 (m, 1H), 5.76 (m, 1H).

**<sup>13</sup>C NMR** (101 MHz, CDCl<sub>3</sub>):  $\delta$ /ppm = 25.6 (CH<sub>3</sub>), 29.0 (CH<sub>3</sub>), 29.3 (CH<sub>3</sub>), 33.1 (C), 34.9 (C), 35.7 (C), 42.7 (CH<sub>2</sub>), 42.8 (CH<sub>2</sub>), 45.3 (CH<sub>2</sub>), 50.2 (CH<sub>2</sub>), 50.8 (CH<sub>2</sub>), 67.8 (CH), 82.7 (C), 161.6 (C).

Compound **3c** was prepared in two steps from 3,5,7-trimethyl-adamantan-1-ol according to the procedure described in Zonker, B.; Becker, J.; Hrdina, R. *Org. Biomol. Chem.* **2021**, *19*, 4027-4031.

### 2.1.4 Compound 3d

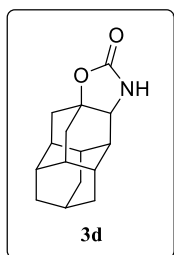

**<sup>1</sup>H NMR** (600 MHz, CDCl<sub>3</sub>):  $\delta$ /ppm = 1.59 (m, 1H), 1.68-1.71 (m, 1H), 1.77-1.83 (m, 8H), 1.86-1.88 (m, 1H), 1.94 (m, 1H), 1.98-2.01 (m, 2H), 2.04-2.07 (m, 1H), 2.10 (m, 1H), 2.14-2.19 (m, 2H), 3.6 (m, 1H), 5.01 (bs, 1H).

**<sup>13</sup>C NMR** (101 MHz, CDCl<sub>3</sub>):  $\delta$ /ppm = 25.9 (CH), 30.6 (CH), 35.9 (CH<sub>2</sub>), 36.7 (CH), 36.8 (CH<sub>2</sub>), 37.1 (CH), 37.3 (CH<sub>2</sub>), 37.5 (CH<sub>2</sub>), 38.3 (CH), 40.1 (CH), 40.2 (CH<sub>2</sub>), 40.3 (CH), 65.1 (CH), 80.7 (C), 161.1 (C).

Compound **3d** was prepared in two steps from diamantan-ol according to the procedure described in Zonker, B.; Becker, J.; Hrdina, R. *Org. Biomol. Chem.* **2021**, *19*, 4027-4031.

### 2.1.5 Compound 3e

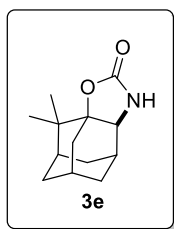

**<sup>1</sup>H NMR** (400 MHz, CDCl<sub>3</sub>): δ/ppm = 1.15 (s, 3H), 1.18 (s, 3H), 1.44-1.54 (m, 2H), 1.6-1.65 (m, 1H), 1.81-1.86 (m, 1H), 1.96-2.05 (m, 4H), 2.11-2.14 (m, 1H), 2.24-2.26 (m, 1H), 4.09-4.11 (m, 1H), 5.76 (bs, 1H).

**<sup>13</sup>C NMR** (101 MHz, CDCl<sub>3</sub>): δ/ppm = 22.7 (CH<sub>3</sub>), 22.8 (CH<sub>3</sub>), 29.4 (CH), 30.7 (CH<sub>2</sub>), 31.9 (CH), 32.1 (CH<sub>2</sub>), 32.2 (CH<sub>2</sub>), 33.1 (CH<sub>2</sub>), 39.7 (C), 41.3 (CH), 58.7 (CH), 85.1 (C), 161.5 (C).

Compound **3e** was prepared in 5 steps from noradamantane-3-carboxylic acid according to the procedure described in Zonker, B.; Becker, J.; Hrdina, R. *Org. Biomol. Chem.* **2021**, *19*, 4027-4031.

### 2.1.6 Compound 4aa

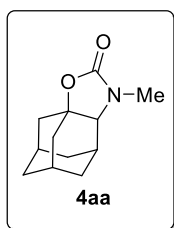

**<sup>1</sup>H NMR** (400 MHz, CDCl<sub>3</sub>): δ/ppm = 1.62-1.78 (m, 6H), 1.83-1.86 (m, 1H), 1.96-2.04 (m, 2H), 2.07-2.11 (m, 2H), 2.28 (m, 2H), 2.78 (s, 3H), 3.28 (m, 1H).

**<sup>13</sup>C NMR** (101 MHz, CDCl<sub>3</sub>): δ/ppm = 29.2 (CH<sub>3</sub>), 29.3 (CH), 29.4 (CH<sub>2</sub>), 30.3 (C), 31.2 (CH<sub>2</sub>), 36.1 (CH), 36.3 (CH<sub>2</sub>), 37.8 (CH<sub>2</sub>), 40.0 (CH<sub>2</sub>), 68.2 (CH), 77.9 (C), 160.6 (C).

Compound **4aa** was prepared from **3a** according to the procedure described in Zonker, B.; Becker, J.; Hrdina, R. *Org. Biomol. Chem.* **2021**, *19*, 4027-4031.

### 2.1.7 Compound 4ab

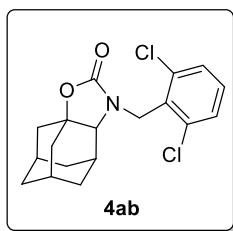

Starting material **3a** (740 mg, 3.84 mmol) was dissolved in THF (8 mL) and the solution was cooled to -15 °C. MeLi (1.6 M solution in Et<sub>2</sub>O) 2.4 mL was added dropwise and the reaction mixture was allowed to reach r.t. and stirred for additional 20 minutes. Then 2,6-dichlorobenzyl bromide (1365 mg, 1.5 equiv.) was added to the reaction mixture and the reaction mixture was heated at 50 °C for additional 16 hours. The reaction was quenched with water and the product was extracted using Et<sub>2</sub>O. Combined organic fractions were dried over MgSO<sub>4</sub> and the product **4ab** was purified by column chromatography on silica gel using hexane: EtOAc 10:1 as a mobile phase. The compound **4ab** was obtained as a crystalline solid (1.02 g) in 76% yield.

**m.p.** (cryst. from CDCl<sub>3</sub>): 156 °C.

**<sup>1</sup>H NMR** (400 MHz, CDCl<sub>3</sub>): δ/ppm = 0.87-0.90 (m, 1H), 1.14-1.17 (m, 1H), 1.55 (m, 2H), 1.64-1.74 (m, 3H), 1.94-1.96 (m, 3H), 2.04-2.08 (m, 2H), 2.19 (m, 1H), 3.45 (m, 1H), 4.52 (d, *J* = 12 Hz, 1H), 5.02 (d, *J* = 12 Hz, 1H), 7.16-7.20 (m, 1H), 7.29-7.31 (m, 2H).

**<sup>13</sup>C NMR** (101 MHz, CDCl<sub>3</sub>): δ/ppm = 29.1 (CH), 29.3 (CH<sub>2</sub>), 30.7 (CH), 31.1 (CH), 36.1 (CH<sub>2</sub>), 36.6 (CH<sub>2</sub>), 38.0 (CH<sub>2</sub>), 39.9 (CH<sub>2</sub>), 44.0 (CH<sub>2</sub>), 68.5 (CH), 77.5 (C), 128.7 (2CH), 129.8 (CH), 132.3 (2C), 136.7 (C), 159.7 (C).

**IR** (neat):  $\tilde{\nu}$  /cm<sup>-1</sup> = 3086, 3072, 2927, 2868 1749, 1728, 1577, 1560, 1433, 1402, 1433, 1402, 1327, 1306, 1296, 1223, 1205, 1153, 1103. 1088, 1036, 985, 957, 935, 897, 835, 781, 769, 677, 611, 575, 517, 411.

**HRMS**: *m/z* = 352.0871 ([M+H]<sup>+</sup>; calculated for C<sub>18</sub>H<sub>20</sub>Cl<sub>2</sub>NO<sub>2</sub><sup>+</sup> *m/z* = 352.0866).

### 2.1.8 Compound 4bb

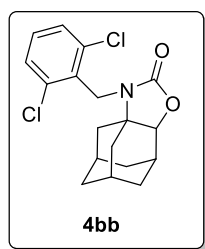

Starting material **3b** (370 mg, 1.92 mmol) was dissolved in THF (4 mL) and the solution was cooled to -15 °C. MeLi (1.6 M solution in Et<sub>2</sub>O) 1.2 mL was added dropwise and the reaction mixture was allowed to reach r.t. and stirred for 20 minutes. Then 2,6-dichloro-benzyl bromide (682 mg, 1.5 equiv.) was added to the reaction mixture and the reaction mixture was heated at 50 °C for additional 16 hours. The reaction was quenched with water and the product was extracted using Et<sub>2</sub>O. Combined organic fractions were dried over MgSO<sub>4</sub>, concentrated *in vacuo* and the product was purified by column chromatography on silica gel using hexane: EtOAc 10:1 as a mobile phase. The compound **4bb** was obtained as a pale yellow solid (581 mg) in 85% yield.

**<sup>1</sup>H NMR** (400 MHz, CDCl<sub>3</sub>): δ/ppm = 1.16-1.19 (m, 1H), 1.53-1.79 (m, 7H), 1.86-1.93 (m, 2H), 2.07-2.09 (m, 1H), 2.19-2.23 (m, 1H), 2.36-2.39 (m, 1H), 3.95-3.96 (m, 1H), 4.51 (d, *J* = 12 Hz, 1H), 4.88 (d, *J* = 12 Hz, 1H), 7.16-7.20 (m, 1H), 7.29-7.31 (m, 2H).

**<sup>13</sup>C NMR** (101 MHz, CDCl<sub>3</sub>): δ/ppm = 27.8 (CH), 29.6 (CH), 29.9 (CH<sub>2</sub>), 30.1 (CH), 35.45 (CH<sub>2</sub>), 36.0 (CH<sub>2</sub>), 36.1 (CH<sub>2</sub>), 38.4 (CH<sub>2</sub>), 40.7 (2CH<sub>2</sub>), 59.5 (C), 83.3 (CH), 128.7 (2CH), 129.7 (CH), 133.0 (C), 136.6 (C), 158.9 (C).

**IR** (neat):  $\tilde{\nu}$  /cm<sup>-1</sup> = 3070, 2945, 2925, 2854, 1755, 1562, 1598, 1459, 1435, 1358, 1333, 1259, 1260, 1228, 1182, 1149, 1109, 1074, 1026, 1016, 993, 933, 904, 866, 812, 768, 737, 687, 626, 575, 519, 467, 415

**HRMS**: *m/z* = 352.0871 ([*M*+*H*]<sup>+</sup>; calculated for C<sub>18</sub>H<sub>20</sub>Cl<sub>2</sub>NO<sub>2</sub><sup>+</sup> *m/z* = 352.0866).

### 2.1.9 Compound 4cb

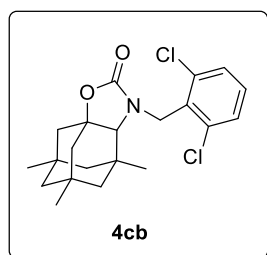

Starting material **3c** (235 mg, 1.0 mmol) was dissolved in THF (2 mL) and the solution was cooled to -15 °C. MeLi (1.6 M solution in Et<sub>2</sub>O) 0.7 mL was added dropwise and the reaction mixture was allowed to reach r.t. and stirred for 20 minutes. Then 2,6-dichloro-benzyl bromide (355 mg, 1.5 equiv.) was added to the reaction mixture and the reaction mixture was heated at

50 °C for additional 16 hours. The reaction was quenched with water and the product was extracted using Et<sub>2</sub>O. Combined organic fractions were dried over MgSO<sub>4</sub>, concentrated *in vacuo* and the product was purified by column chromatography on silica gel using hexane: EtOAc 10:1 as a mobile phase. The compound **4cb** was obtained as a crystalline solid (272 mg) in 69% yield.

**m.p.** (cryst. from Et<sub>2</sub>O): 133.2 °C

**<sup>1</sup>H NMR** (400 MHz, CDCl<sub>3</sub>): δ/ppm = 0.82 (s, 3H), 0.89 (s, 3H), 0.93 (s, 4H), 1.01-1.09 (m, 2H), 1.16-1.19 (m, 1H), 1.26-1.32 (m, 2H), 1.36-1.4 (m, 1H), 1.60-1.66 (m, 1H), 1.70-1.72 (m, 1H), 1.84-1.87 (m, 1H), 3.10 (m, 1H), 4.64 (d, *J*=14Hz, 1H), 4.93 (d, *J*=14Hz, 1H), 7.15 (m, 1H), 7.3 (d, *J*=8 Hz, 2H).

**<sup>13</sup>C NMR** (101 MHz, CDCl<sub>3</sub>): δ/ppm = 26.5 (CH<sub>3</sub>), 29.0 (CH<sub>3</sub>), 29.1 (CH<sub>3</sub>), 32.9 (C), 34.9 (C), 36.2 (C), 43.8 (CH<sub>2</sub>), 43.9 (CH<sub>2</sub>), 45.2 (CH<sub>2</sub>), 45.7 (CH<sub>2</sub>), 50.0 (CH<sub>2</sub>), 52.6 (CH<sub>2</sub>), 72.35 (CH), 79.6 (C), 129.0 (CH), 129.2 (2CH), 132.8 (2C), 136.0 (C), 160.5 (C).

**IR** (neat):  $\tilde{\nu}$  /cm<sup>-1</sup> = 3062, 2952, 2908, 2837, 1755, 1562, 1471, 1439, 1410, 1391, 1344, 1298, 1257, 1207, 1193, 1155, 1109, 1086, 1038, 1018, 997, 962, 914, 895, 854, 829, 775, 721, 706, 667, 636, 607, 561, 530, 501, 463.

**HRMS**: *m/z* = 394.1334 ([M+H]<sup>+</sup>; calculated for C<sub>21</sub>H<sub>26</sub>Cl<sub>2</sub>NO<sub>2</sub><sup>+</sup> *m/z* = 394.1336).

#### 2.1.10 Compound 4db

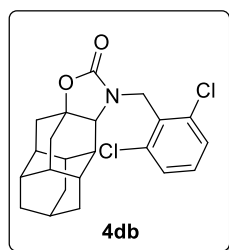

Starting material **3d** (235 mg, 1.0 mmol) was dissolved in THF (2 mL) and the solution was cooled to -15 °C. MeLi (1.6 M solution in Et<sub>2</sub>O) 0.7 mL was added dropwise and the reaction mixture was allowed to reach r.t. and stirred for 20 minutes. Then 2,6-dichloro-benzyl bromide (355 mg, 1.5 equiv.) was added to the reaction mixture and the reaction mixture was heated at 50 °C for additional 16 hours. The reaction was quenched with water and the product was extracted using Et<sub>2</sub>O. Combined organic fractions were dried over MgSO<sub>4</sub>, concentrated *in vacuo* and the product was purified by column chromatography on silica gel using hexane: EtOAc 10:1 as a mobile phase. The compound **4db** was obtained as a crystalline solid (260 mg) in 64% yield.

**m.p.** (cryst. from Et<sub>2</sub>O): 210.7 °C.

**<sup>1</sup>H NMR** (400 MHz, CDCl<sub>3</sub>): δ/ppm = 0.96 (m, 1H), 1.09-1.13 (m, 1H), 1.46-1.49 (m, 1H), 1.61-1.75 (m, 9H), 1.81 (m, 1H), 1.90-2.09 (m, 4H), 3.38 (m, 1H), 4.53 (d, *J*= 4 Hz, 1H), 5.00 (d, *J*= 4 Hz, 1H), 7.17-7.21 (m, 1H), 7.30 (s, 1H), 7.32 (s, 1H).

**$^{13}\text{C}$  NMR** (101 MHz,  $\text{CDCl}_3$ ):  $\delta/\text{ppm}$  = 25.6 (CH), 31.1 (2CH), 36.0 ( $\text{CH}_2$ ), 36.5 (CH), 36.6 ( $\text{CH}_2$ ), 37.2 (CH), 37.3 ( $\text{CH}_2$ ), 38.0 (CH), 38.3 ( $\text{CH}_2$ ), 39.9 (CH), 39.92( $\text{CH}_2$ ) 43.9 ( $\text{CH}_2$ ), 69.3 (CH), 128.7 (CH), 129.8 (2CH), 132.5 (C), 136.9 (2C), 159.8 (C).

**IR** (neat):  $\tilde{\nu}/\text{cm}^{-1}$  = 3087, 2956, 2908, 2870, 2779, 2684, 2648, 1751, 1581, 1562, 1543, 1460, 1435, 1388, 1334, 1302, 1137, 1190, 1159, 1088, 1070, 1011, 962, 941, 897, 831, 816, 785, 773, 762, 692, 658, 580, 546, 496.

**HRMS**:  $m/z$  = 426.1000 ( $[\text{M}+\text{Na}]^+$ ; calculated for  $\text{C}_{22}\text{H}_{23}\text{Cl}_2\text{NO}_2\text{Na}^+$   $m/z$  = 426.0998).

### 2.1.11 Compound 4ea

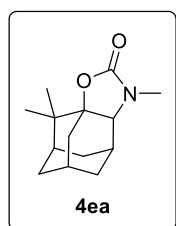

**$^1\text{H}$  NMR** (400 MHz,  $\text{CDCl}_3$ ):  $\delta/\text{ppm}$  = 1.13 (s, 3H), 1.18 (s, 3H), 1.46-1.50 (m, 1H), 1.54-1.59 (m, 1H), 1.65-1.71 (m, 2H), 1.83-1.87 (m, 1H), 1.99-2.04 (m, 3H), 2.11-2.14 (m, 1H), 2.16-2.25 (m, 1H), 2.77 (s, 3H), 3.7-3.71 (m, 1H).

**$^{13}\text{C}$  NMR** (101 MHz,  $\text{CDCl}_3$ ):  $\delta/\text{ppm}$  = 22.6 ( $\text{CH}_3$ ), 22.8 ( $\text{CH}_3$ ), 29.4 (CH), 29.5 ( $\text{CH}_3$ ), 31.0 (CH), 31.1 ( $\text{CH}_2$ ), 32.1 ( $\text{CH}_2$ ), 32.8 ( $\text{CH}_2$ ), 33.1 ( $\text{CH}_2$ ), 39.6 (C), 41.5 (CH), 63.0 (CH), 86.2 (C), 160.6 (C).

Compound 4ea was prepared from 3e according to the procedure described in Zonker, B.; Becker, J.; Hrdina, R. *Org. Biomol. Chem.* **2021**, *19*, 4027-4031.

### 2.1.12 Compound 4eb

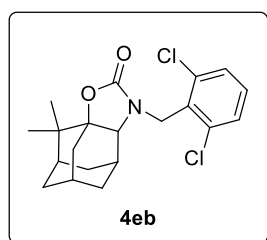

Starting material 3e (110 mg, 0.5 mmol) was dissolved in THF (1 mL) and the solution was cooled to  $-15\text{ }^\circ\text{C}$ . MeLi (1.6 M solution in  $\text{Et}_2\text{O}$ ) 0.35 mL was added dropwise and the reaction mixture was allowed to reach r.t. and stirred for 20 minutes. Then 2,6-dichloro-benzyl bromide (177 mg, 1.5 equiv.) was added to the reaction mixture and the reaction mixture was heated at  $50\text{ }^\circ\text{C}$  for additional 16 hours. The reaction was quenched with water and the product was extracted using  $\text{Et}_2\text{O}$ . Combined organic fractions were dried over  $\text{MgSO}_4$ , concentrated *in vacuo* and the product was purified by column chromatography on silica gel using hexane:

EtOAc 10:1 as a mobile phase. The compound was obtained as a crystalline solid (120 mg) in 63% yield.

**m.p.** (cryst. from EtOAc): 210 - 211 °C.

**<sup>1</sup>H NMR** (400 MHz, CDCl<sub>3</sub>): δ/ppm = 0.79-0.84 (m, 1H), 1.07-1.23 (m, 7H), 1.32-1.36 (m, 1H), 1.46-1.57 (m, 2H), 1.87-1.95 (m, 5H), 2.08-2.11 (m, 1H), 3.86 (m, 1H), 4.5 (d, J=16 Hz, 1H), 5.02 (d, J=12 Hz, 1H), 7.16-7.26 (m, 1H), 7.29-7.31 (m, 2H).

**<sup>13</sup>C NMR** (101 MHz, CDCl<sub>3</sub>): δ/ppm = 22.6 (CH<sub>3</sub>), 22.9 (CH<sub>3</sub>), 29.3 (CH), 30.9 (CH<sub>2</sub>), 31.8 (CH), 32.0 (CH<sub>2</sub>), 33.0 (CH<sub>2</sub>), 33.3 (CH<sub>2</sub>), 39.4 (C), 41.0 (CH), 44.2 (CH<sub>2</sub>), 63.5 (CH), 81.8 (C), 128.7 (CH), 129.8 (2CH), 132.3 (C), 136.7 (2C), 159.8 (C).

**IR** (neat):  $\tilde{\nu}$  /cm<sup>-1</sup> = 2999, 2924, 2887, 2868, 1749, 1562, 1537, 1475, 1435, 1404, 1319, 1292, 1211, 1146, 1103, 1090, 1032, 974, 964, 945, 920, 903, 866, 837, 831, 781, 764, 733, 673, 663, 528, 480, 455, 430.

**HRMS**: m/z = 380.1181 ([M+H]<sup>+</sup>; calculated for C<sub>20</sub>H<sub>24</sub>Cl<sub>2</sub>NO<sub>2</sub><sup>+</sup> m/z = 380.1106).

## 2.2 Preparation and characterisation of compounds 5-26

### 2.2.1 Compound 5

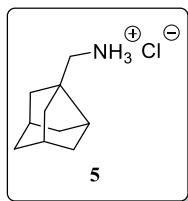

Starting material **3a** (100 mg, 0.5 mmol) was dissolved in dry 1,2,4-trichlorobenzene (8 mL) and 150 mg (2 equiv.) of freshly distilled anhydrous triflic acid was added to the solution at r.t. The reaction mixture was heated for 4 hours at 120 °C under inert atmosphere. Then the reaction mixture was cooled to -78 °C, it solidified, and  $\text{LiAlH}_4$  (38 mg, 1 mmol) was added on the top. Then dry THF 2 mL was added at -78 °C and the reaction was let to warm up to r.t. and stirred at r.t. for 3h. The reaction was quenched with sat. solution of  $\text{Na}_2\text{CO}_3$ , product, resulting amine, was extracted with  $\text{Et}_2\text{O}$ . Combined organic fractions were dried over  $\text{MgSO}_4$  and  $\text{Et}_2\text{O}$  with THF was evaporated under *vacuo*. To the solution of product, free amine, in 1,2,4-trichlorobenzene was added HCl in  $\text{Et}_2\text{O}$  and the resulting hydrochloric salt was filtered off. The product was purified by crystallisation from EtOAc and obtained as colourless crystalline solid (65 mg) in 69% yield.

*Please, note that if triflic acid is not anhydrous or the solvent is contaminated with water then the yield drops dramatically.*

**m.p.** (cryst. from EtOAc): 212.4 - 213.1 °C.

**$^1\text{H}$  NMR** (400 MHz,  $\text{CD}_3\text{OD}$ ):  $\delta/\text{ppm}$  = 1.65-1.82 (m, 10H), 2.18 (m, 1H), 2.29 (m, 2H), 3.08 (bs, 2H).

**$^{13}\text{C}$  NMR** (101 MHz,  $\text{CD}_3\text{OD}$ ):  $\delta/\text{ppm}$  = 35.8 ( $\text{CH}_2$ ), 39.0 (CH), 43.2 (CH), 43.6 (CH), 44.6 ( $\text{CH}_2$ ), 47.7 ( $2\text{CH}_2$ ), 48.2 ( $2\text{CH}_2$ ), 48.8 (C).

**IR** (neat):  $\tilde{\nu}/\text{cm}^{-1}$  = 3535, 2947, 2916, 2488, 1653, 1616, 1506, 1464, 1388, 1304, 1252, 1099, 982, 931, 862, 789, 584.

**HRMS**:  $m/z$  = 152.1434 ( $[\text{M}]^+$ ; calculated for  $\text{C}_{10}\text{H}_{18}\text{N}^+$   $m/z$  = 152.1434).

### 2.2.2 Compound 6

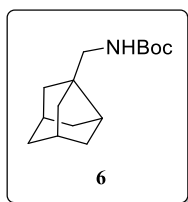

To the solution of **5** (as free amine  $\text{R-NH}_2$ ) (140 mg, 0.93 mmol) and *N,N*-dimethylamino pyridine (6 mg) in dichloromethane (2 mL) was added Boc-anhydride (218 mg, 1 mmol) and



the reaction mixture was stirred for 16 hours. The reaction was quenched with brine and the product was extracted using Et<sub>2</sub>O. Combined organic fractions were concentrated *in vacuo* and the product was purified using column chromatography on silica-gel using hexane: Et<sub>2</sub>O 2:1 as a mobile phase. The compound **6** was obtained as a colourless crystalline solid (150mg) in 60% yield.

**m.p.** (cryst. from pentane): 67.5 - 68.7 °C.

**<sup>1</sup>H NMR** (400 MHz, CDCl<sub>3</sub>): δ/ppm = 1.42 (s, 9H), 1.52-1.68 (m, 10H), 2.02 (m, 1H), 2.19 (m, 2H), 3.21 (d, *J* = 8 Hz, 2H), 4.57 (bs, 1H).

**<sup>13</sup>C NMR** (101 MHz, CDCl<sub>3</sub>): δ/ppm = 28.5 (3CH<sub>3</sub>), 35.4 (CH<sub>2</sub>), 37.5 (2CH), 41.4 (CH), 44.1 (CH<sub>2</sub>), 47.0 (2CH<sub>2</sub>), 47.8 (2CH<sub>2</sub>), 49.5 (C), 80.0 (C), 156.5 (C).

**IR** (neat):  $\tilde{\nu}$  /cm<sup>-1</sup> = 3340, 2920, 2862, 1684, 1533, 1479, 1454, 1387, 1361, 1290, 1271, 1250, 1163, 1120, 1097, 1078, 1039, 1082, 982, 893, 866, 843, 781, 766, 658, 461, 434.

**HRMS**: *m/z* = 252.1961 ([*M*+*H*]<sup>+</sup> calculated for C<sub>15</sub>H<sub>26</sub>NO<sub>2</sub><sup>+</sup> *m/z* = 252.1958).

### 2.2.3 Compound 7

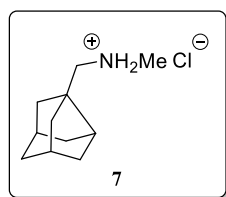

Starting material **4aa** (207 mg, 1 mmol) was dissolved in dry 1,2,4-trichlorobenzene (4 mL) and (300 mg, 2 equiv.) of freshly distilled anhydrous triflic acid was added to the solution at r.t. The reaction mixture was heated for 4 hours at 140 °C under inert atmosphere. Then the reaction mixture was cooled to -78 °C, it solidified, and LiAlH<sub>4</sub> (76 mg, 2 mmol) was added on the top. Then dry THF (2 mL) was added at -78 °C and the reaction was let to warm up to r.t. and stirred at r.t. for 3h. The reaction was quenched with sat. solution of Na<sub>2</sub>CO<sub>3</sub>, product, resulting amine, was extracted with Et<sub>2</sub>O. Combined organic fractions were dried over MgSO<sub>4</sub> and then Et<sub>2</sub>O with THF was evaporated under *vacuo*. To the solution of amine in 1,2,4-trichlorobenzene was added HCl in Et<sub>2</sub>O and the resulting hydrochloric salt was filtered off. The product was purified by crystallisation from EtOAc and obtained as colourless crystalline solid (140 mg) in 70% yield.

*Please, note that if triflic acid is not anhydrous or the solvent is contaminated with water then the yield drops dramatically.*

**m.p.** (cryst. from EtOAc): not measurable, sublimation of the sample occurred at 230 °C.

**<sup>1</sup>H NMR** (400 MHz, CD<sub>3</sub>OD): δ/ppm = 1.65-1.86 (m, 10H), 2.22 (m, 1H), 2.31 (m, 2H), 2.77 (s, 3H), 3.18 (bs, 2H).

**<sup>13</sup>C NMR** (101 MHz, CD<sub>3</sub>OD): δ/ppm = 35.0 (CH), 35.7 (CH<sub>2</sub>), 38.9 (CH<sub>3</sub>), 43.6 (CH), 44.5 (2CH<sub>2</sub>), 47.7 (CH<sub>2</sub>), 48.5 (C), 58.6 (2CH<sub>2</sub>).

**IR** (neat):  $\tilde{\nu}$  /cm<sup>-1</sup> = 2918, 2862, 2846, 2762, 2438, 1591, 1468, 1460, 1431, 1398, 1338, 1302, 1154, 1134, 1117, 1101, 1024, 1016, 997, 941, 916, 862, 779, 671, 646, 523.

**HRMS**:  $m/z$  = 166.1589 ([M]<sup>+</sup>; calculated for C<sub>11</sub>H<sub>20</sub>N<sup>+</sup>  $m/z$  = 166.1591).

## 2.2.4 Compound 8

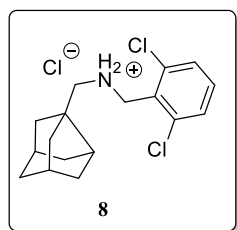

Starting material **4ab** (700 mg, 2 mmol) was dissolved in dry 1,2,4-trichlorobenzene (8 mL) and 600 mg (2 equiv.) of freshly distilled anhydrous triflic acid was added to the solution at r.t. The reaction mixture was heated for 16 hours at 150 °C under inert atmosphere. Then the reaction mixture was cooled to -78 °C, solidified, and LiAlH<sub>4</sub> (152 mg, 4 mmol) was added on the surface. Then dry THF (4 mL) was added at -78 °C and the reaction was let to warm up to r.t. and stirred at r.t. for 3h. The reaction was quenched with sat. solution of Na<sub>2</sub>CO<sub>3</sub>, product, resulting amine, was extracted with Et<sub>2</sub>O. Combined organic fractions were dried over MgSO<sub>4</sub> and Et<sub>2</sub>O with THF was evaporated under *vacuo*. To the solution of amine in 1,2,4-trichlorobenzene was added HCl in Et<sub>2</sub>O and the resulting hydrochloric salt was filtered off. The product was purified by crystallisation from EtOAc and obtained as colourless crystalline solid (596 mg) in 84% yield. *Please, note that if triflic acid is not anhydrous or the solvent is contaminated with water then the yield drops dramatically.*

**m.p.** (cryst. from EtOAc): 197 - 198 °C.

**<sup>1</sup>H NMR** (400 MHz, CDCl<sub>3</sub>):  $\delta$ /ppm = 1.50-1.73 (m, 10H), 1.96-1.99 (m, 1H), 2.19 (m, 2H), 2.65 (m, 2H), 4.13 (m, 2H), 7.10-7.14 (m, 1H), 7.28-7.30 (m, 2H).

**<sup>13</sup>C NMR** (101 MHz, CDCl<sub>3</sub>):  $\delta$ /ppm = 35.5 (CH<sub>2</sub>), 37.7 (2CH), 42.3 (CH), 44.0 (2CH<sub>2</sub>), 47.5 (2CH<sub>2</sub>), 49.2 (CH<sub>2</sub>), 49.5 (C), 56.6 (CH<sub>2</sub>), 128.5 (2CH), 128.8 (CH), 136.1 (2C), 136.3 (C).

**IR** (neat):  $\tilde{\nu}$  /cm<sup>-1</sup> = 2925, 2862, 2802, 1581, 1457, 1410, 1329, 1200, 1147, 1084, 910, 825, 770, 723, 615.

**HRMS**:  $m/z$  = 310.1122 ([M]<sup>+</sup>; calculated for C<sub>17</sub>H<sub>22</sub>Cl<sub>2</sub>N<sup>+</sup>  $m/z$  = 310.1124).

### 2.2.5 Compound 9

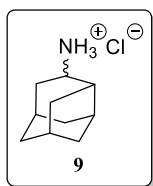

Starting material **3b** (318 mg, 1.65 mmol) was dissolved in dry 1,2,4-trichlorobenzene (13 mL) and 495 mg (2 equiv.) of freshly distilled anhydrous triflic acid was added to the solution at r.t. The reaction mixture was heated for 4 hours at 120 °C under inert atmosphere. Then the reaction mixture was cooled to -78 °C, it solidified, and LiAlH<sub>4</sub> (125 mg, 3.3 mmol) was added on the surface. Then dry THF (2 mL) was added at -78 °C and the reaction was let to warm up to r.t. and stirred at r.t. for 3h. The reaction was quenched with sat. solution of Na<sub>2</sub>CO<sub>3</sub>, product, resulting amine, was extracted with Et<sub>2</sub>O. Combined organic fractions were dried over MgSO<sub>4</sub> and Et<sub>2</sub>O with THF was evaporated under *vacuo*. To the solution of amine in 1,2,4-trichlorobenzene was added HCl in Et<sub>2</sub>O and the resulting hydrochloric salt was filtered off. The product **9** (1 to 1 mixture of diastereomers) was purified by crystallisation from EtOAc and obtained as colourless crystalline solid (278 mg) in 90% yield. *Please, note that if triflic acid is not anhydrous or the solvent is contaminated with water then the yield drops dramatically. Following NMR spectra were recorded for the 1:1 mixture of diastereomers. The compound was transformed to Boc-protected derivative 10, which was separated into individual isomers.*

**<sup>1</sup>H NMR** (400 MHz, CD<sub>3</sub>OD): δ/ppm = 1.42-1.53 (m, 6H), 1.56-1.73 (m, 6H), 1.75-1.80 (m, 2H), 1.84-1.99 (m, 4H), 2.01-2.11 (m, 2H), 2.16-2.42 (m, 6H), 2.48-2.55 (m, 2H), 3.46-3.51 (m, 1H), 3.62-3.65 (m, 1H).

**<sup>13</sup>C NMR** (101 MHz, CD<sub>3</sub>OD): δ/ppm = 28.4 (CH), 29.6 (CH), 32.1 (CH<sub>2</sub>), 32.2 (CH<sub>2</sub>), 32.5 (CH<sub>2</sub>), 32.9 (CH<sub>2</sub>), 33.6 (CH<sub>2</sub>), 34.1 (CH<sub>2</sub>), 36.1 (CH), 36.2 (CH), 36.3 (CH), 36.6 (CH), 38.1 (CH<sub>2</sub>), 39.2 (CH), 39.3 (CH), 39.8 (CH<sub>2</sub>), 40.3 (CH<sub>2</sub>), 42.2 (CH<sub>2</sub>), 49.5 (CH), 50.8 (CH).

### 2.2.6 Compound 10-11

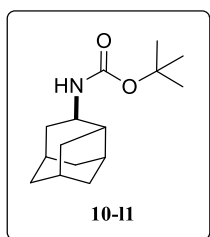

To the solution of free amine of **9** (151 mg, 1.0 mmol) and *N,N*-dimethylamino pyridine (6 mg) in dichloromethane (2 mL) was added Boc-anhydride (240 mg, 1.1 mmol) and the reaction mixture was stirred for 16 hours. The reaction was quenched with brine and the product was extracted using Et<sub>2</sub>O. Combined organic fractions were concentrated *in vacuo* and the product was purified using column chromatography on silica-gel using hexane:Et<sub>2</sub>O 2:1 as a mobile phase. The compound **10** was obtained as a colourless 1:1 mixture of two isomers **10-I1** and **10-I2** (105 mg) in 42% combined yield.

Isomer **10-I1** crystallises preferentially out of the hexane solution and was recrystallised in pentane.

**m.p.** (cryst. from pentane): 106.7 - 107.3 °C.

**<sup>1</sup>H NMR** (400 MHz, CDCl<sub>3</sub>): δ/ppm = 1.15-1.21 (m, 1H), 1.26-1.33 (m, 2H), 1.37-1.42 (m, 2H), 1.45 (m, 9H), 1.49-1.56 (m, 1H), 1.58-1.65 (m, 2H), 1.73-1.83 (m, 1H), 2.00-2.06 (m, 1H), 2.15-2.41 (m, 4H), 3.80-3.90 (m, 1H), 4.40-4.50 (m, 1H).

**<sup>13</sup>C NMR** (101 MHz, CDCl<sub>3</sub>): δ/ppm = 28.6 (3CH<sub>3</sub>), 28.8 (CH), 31.9 (CH<sub>2</sub>), 32.5 (CH<sub>2</sub>), 34.7 (CH), 35.5 (CH), 35.6 (CH<sub>2</sub>), 39.8 (CH), 40.0 (CH<sub>2</sub>), 41.6 (CH<sub>2</sub>), 46.7 (CH), 77.4 (C), 152.1 (C) hardly visible.

**IR** (neat):  $\tilde{\nu}$  /cm<sup>-1</sup> = 3338, 2978, 2916, 2866, 2846, 2486, 1674, 1520, 1456, 1410, 1365, 1350, 1308, 1252, 1165, 1090, 1039, 1016, 999, 960, 930, 895, 870, 829, 804, 793, 762, 737, 619, 577, 461, 426.

**HRMS**: m/z = 274.1781 ([M+Na]<sup>+</sup>; calculated for C<sub>15</sub>H<sub>25</sub>NO<sub>2</sub>Na<sup>+</sup> m/z = 274.1778).

### Compound 10-12

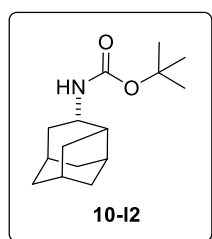

**m.p.** (cryst. from pentane): 106.7 - 107.3 °C.

**<sup>1</sup>H NMR** (400 MHz, CDCl<sub>3</sub>): δ/ppm = 1.30-1.40 (m, 4H), 1.46-1.56 (m, 4H), 1.60-1.68 (m, 3H), 1.75-1.83 (m, 4H), 1.94-2.03 (m, 2H), 2.12-2.24 (m, 3H), 2.36-2.47 (m, 2H), 3.86-3.92 (m, 1H), 4.66-4.75 (m, 1H).

**<sup>13</sup>C NMR** (101 MHz, CDCl<sub>3</sub>): δ/ppm = 27.7 (CH), 28.6 (3CH<sub>3</sub>), 31.6 (CH<sub>2</sub>), 32.2 (CH<sub>2</sub>), 34.7 (CH), 35.2 (CH), 37.1 (CH<sub>2</sub>), 39.5 (CH), 39.7 (CH<sub>2</sub>), 42.6 (CH<sub>2</sub>), 48.7 (CH), 79.1 (C), 155.1 (C) hardly visible.

**IR** (neat):  $\tilde{\nu}$  /cm<sup>-1</sup> = 3456, 3259, 2924, 2866, 2844, 2251, 1693, 1525, 1495, 1473, 1452, 1363, 1352, 1302, 1248, 1163, 1063, 1028, 1014, 997, 978, 908, 872, 850, 818, 779, 729, 649, 586, 567, 461, 440.

**HRMS**: m/z = 274.1781 ([M+Na]<sup>+</sup>; calculated for C<sub>15</sub>H<sub>25</sub>NO<sub>2</sub>Na<sup>+</sup> m/z = 274.1778).

### 2.2.7 Compound 11

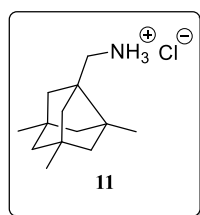

Starting material **3c** (117 mg, 0.5 mmol) was dissolved in dry 1,2,4-trichlorobenzene (4 mL) and (150 mg, 2 equiv.) of freshly distilled anhydrous triflic acid was added to the solution at r.t. The reaction mixture was heated for 4 hours at 120 °C under inert atmosphere. Then the reaction mixture was cooled to -78 °C, it solidified, and LiAlH<sub>4</sub> (38 mg, 1.0 mmol) was added on the surface. Then dry THF (2 mL) was added at -78 °C and the reaction was let to warm up to r.t. and stirred at r.t. for 3h. The reaction was quenched with sat. solution of Na<sub>2</sub>CO<sub>3</sub>, product, resulting amine, was extracted with Et<sub>2</sub>O. Combined organic fractions were dried over MgSO<sub>4</sub> and Et<sub>2</sub>O with THF was evaporated under *vacuo*. To the solution of amine in 1,2,4-trichlorobenzene was added HCl in Et<sub>2</sub>O and the resulting hydrochloric salt was filtered off. The product was purified by crystallisation from EtOAc and obtained as colourless crystalline solid (90 mg) in 78% yield. *Please, note that if triflic acid is not anhydrous or the solvent is contaminated with water then the yield drops dramatically.*

**m.p.** (cryst. from EtOAc): 285.4 - 286.3 °C.

**<sup>1</sup>H NMR** (400 MHz, CD<sub>3</sub>OD): δ/ppm = 1.03 (s, 6H), 1.05 (s, 3H), 1.38-1.47 (m, 10H), 2.96 (s, 2H).

**<sup>13</sup>C NMR** (101 MHz, CD<sub>3</sub>OD): δ/ppm = 21.5 (CH<sub>3</sub>), 24.9 (2CH<sub>3</sub>), 40.9 (2C), 47.6 (CH<sub>2</sub>), 48.9 (CH<sub>2</sub>), 49.7 (C), 50.1 (C), 53.6 (2CH<sub>2</sub>), 57.9 (2CH<sub>2</sub>).

**IR** (neat):  $\tilde{\nu}$  /cm<sup>-1</sup> = 3010, 2943, 2918, 2891, 2662, 2850, 2713, 2609, 2038, 1618, 1604, 1502, 1454, 1390, 1371, 1348, 1286, 1234, 1215, 1149, 1117, 1080, 1022, 968, 708, 638, 579, 525.

**HRMS**:  $m/z$  = 194.1902 ([M]<sup>+</sup>; calculated for C<sub>13</sub>H<sub>24</sub>N<sup>+</sup>  $m/z$  = 194.1904).

### 2.2.8 Compound 12

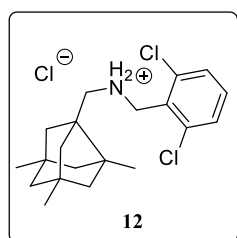

Starting material **4cb** (200 mg, 0.5 mmol) was dissolved in dry 1,2,4-trichlorobenzene (2 mL) and 150 mg (2 equiv.) of freshly distilled anhydrous triflic acid was added to the solution at r.t. The reaction mixture was heated for 16 hours at 150 °C under inert atmosphere. Then the reaction mixture was cooled to -78 °C, it solidified, and LiAlH<sub>4</sub> (38 mg, 1 mmol) was added on the surface. Then dry THF (2 mL) was added at -78 °C and the reaction was let to warm up to r.t. and stirred at r.t. for 3h. The reaction was quenched with sat. solution of Na<sub>2</sub>CO<sub>3</sub>, product,

resulting amine, was extracted with Et<sub>2</sub>O. Combined organic fractions were dried over MgSO<sub>4</sub> and Et<sub>2</sub>O with THF was evaporated under *vacuo*. To the solution of amine in 1,2,4-trichlorobenzene was added HCl in Et<sub>2</sub>O and the resulting hydrochloric salt was filtered off. The product **12** was purified by crystallisation from EtOAc and obtained as colourless crystalline solid (120 mg) in 62% yield. *Please, note that if triflic acid is not anhydrous or the solvent is contaminated with water then the yield drops dramatically.*

**m.p.** (cryst. from EtOAc): 285.4 - 286.3 °C.

**<sup>1</sup>H NMR** (400 MHz, CD<sub>3</sub>Cl<sub>3</sub>): δ/ppm = 0.84 (s, 3H), 0.92 (s, 6H), 1.22-1.42 (m, 8H), 1.75-1.78 (m, 2H), 2.81 (br s, 2H), 4.64 (m, 2H), 7.31-7.35 (m, 1H), 7.4-7.42 (m, 2H), 9.19 (br s, 2H).

**<sup>13</sup>C NMR** (101 MHz, CD<sub>3</sub>Cl<sub>3</sub>): δ/ppm = 21.3 (CH<sub>3</sub>), 24.5 (2CH<sub>3</sub>), 40.2 (C), 46.5 (2CH<sub>2</sub>), 47.7 (2CH<sub>2</sub>), 48.8 (2C), 48.9 (C), 52.7 (2CH<sub>2</sub>), 56.8 (CH<sub>2</sub>), 127.2 (2C), 129.1 (2CH), 131.9 (CH), 137.4 (C).

**IR** (neat):  $\tilde{\nu}$ /cm<sup>-1</sup> = 3379, 3298, 3226, 3098, 2951, 2937, 2924, 2902, 2864, 2837, 2733, 2584, 1620, 1577, 1562, 1452, 1439, 1408, 1371, 1209, 1169, 1093, 1030, 1005, 968, 949, 922, 789, 764, 719, 661, 634, 546.

**HRMS**: m/z = 352.1593 ([M]<sup>+</sup>; calculated for C<sub>20</sub>H<sub>28</sub>Cl<sub>2</sub>N<sup>+</sup> m/z = 352.1594).

### 2.2.9 Compound 13

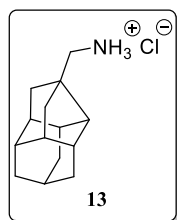

Starting material **3d** (120 mg, 0.5 mmol) was dissolved in dry 1,2,4-trichlorobenzene (4 mL) and (150 mg, 2 equiv.) of freshly distilled anhydrous triflic acid was added to the solution at r.t. The reaction mixture was heated for 4 hours at 120 °C under inert atmosphere. Then the reaction mixture was cooled to -78 °C, solidified, and LiAlH<sub>4</sub> (38 mg, 1.0 mmol) was added on the surface. Then dry THF (2 mL) was added at -78 °C and the reaction was let to warm up to r.t. and stirred at r.t. for 3h. The reaction was quenched with sat. solution of Na<sub>2</sub>CO<sub>3</sub>, product, resulting amine, was extracted with Et<sub>2</sub>O. Combined organic fractions were dried over MgSO<sub>4</sub> and Et<sub>2</sub>O with THF was evaporated under *vacuo*. To the solution of amine in 1,2,4-trichlorobenzene was added HCl in Et<sub>2</sub>O and the resulting hydrochloric salt was filtered off. The product **13** was purified by crystallisation from EtOAc and obtained as colourless crystalline solid (80 mg) in 67% yield. *Please, note that if triflic acid is not anhydrous or the solvent is contaminated with water then the yield drops dramatically.*

**m.p.** (cryst. from EtOAc): 182.8 - 183.7 °C

**<sup>1</sup>H NMR** (400 MHz, CD<sub>3</sub>OD): δ/ppm = 1.61-1.69 (m, 4H), 1.76 (m, 2H), 1.83-1.87 (m, 4H), 1.93-1.96 (m, 5H), 2.03 (m, 2H), 3.04 (m, 2H).

**$^{13}\text{C}$  NMR** (101 MHz,  $\text{CD}_3\text{OD}$ ):  $\delta/\text{ppm}$  = 26.1 (CH), 34.3 ( $2\text{CH}_2$ ), 35.6 ( $\text{CH}_2$ ), 36.4 ( $2\text{CH}$ ), 43.0 ( $2\text{CH}$ ), 46.1 ( $\text{CH}_2$ ), 46.8 ( $2\text{CH}$ ), 48.0 ( $2\text{CH}_2$ ), 50.5 (C).

**IR** (neat):  $\tilde{\nu}/\text{cm}^{-1}$  = 3159, 3120, 2908, 2848, 1610, 1504, 1441, 1248, 1225, 1200, 1169, 1024, 982, 849, 762, 633, 580, 517.

**HRMS**:  $m/z$  = 204.1747 ( $[\text{M}]^+$ ; calculated for  $\text{C}_{14}\text{H}_{22}\text{N}^+$   $m/z$  = 204.1747).

### 2.2.10 Compound 14

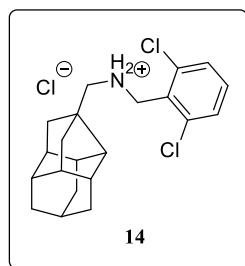

Starting material **4db** (100 mg, 0.25 mmol) was dissolved in dry 1,2,4-trichlorobenzene (1 mL) and (75 mg, 2 equiv.) of freshly distilled anhydrous triflic acid was added to the solution at r.t. The reaction mixture was heated for 16 hours at 150 °C under inert atmosphere. Then the reaction mixture was cooled to -78 °C, it solidified, and  $\text{LiAlH}_4$  (19 mg, 0.5 mmol) was added on the surface. Then dry THF (1 mL) was added at -78 °C and the reaction was let to warm up to r.t. and stirred at r.t. for 3h. The reaction was quenched with sat. solution of  $\text{Na}_2\text{CO}_3$ , product, resulting amine, was extracted with  $\text{Et}_2\text{O}$ . Combined organic fractions were dried over  $\text{MgSO}_4$  and  $\text{Et}_2\text{O}$  with THF was evaporated under *vacuo*. To the solution of amine in 1,2,4-trichlorobenzene was added HCl in  $\text{Et}_2\text{O}$  and the resulting hydrochloric salt was filtered off. The product **14** was purified by crystallisation from EtOAc and obtained as colourless crystalline solid (45 mg) in 45% yield. *Please, note that if triflic acid is not anhydrous or the solvent is contaminated with water then the yield drops dramatically.*

**m.p.** (cryst. from EtOAc): 182.8 - 183.7 °C

**$^1\text{H}$  NMR** (400 MHz,  $\text{CD}_3\text{Cl}_3$ ):  $\delta/\text{ppm}$  = 1.63-1.96 (m, 19H), 2.94 (m, 2H), 4.65 (m, 2H), 7.30-7.34 (m, 1H), 7.40-7.42 (m, 2H).

**$^{13}\text{C}$  NMR** (101 MHz,  $\text{CD}_3\text{Cl}_3$ ):  $\delta/\text{ppm}$  = 24.6 (CH), 33.3 ( $\text{CH}_2$ ), 34.6 ( $2\text{CH}_2$ ), 34.9 (CH), 41.5 (CH), 45.5 ( $2\text{CH}$ ), 45.8 ( $\text{CH}_2$ ), 46.3 ( $2\text{CH}_2$ ), 46.5 ( $2\text{CH}$ ), 49.1 (C), 53.3 ( $\text{CH}_2$ ), 127.3 ( $2\text{C}$ ), 129.1 ( $2\text{CH}$ ), 131.8 (CH), 137.4 (C).

**IR** (neat):  $\tilde{\nu}/\text{cm}^{-1}$  = 3390, 3062, 2902, 2844, 2642, 2559, 2515, 2387, 1579, 1562, 1452, 1435, 1338, 1302, 1209, 1173, 1092, 1028, 1012, 962, 843, 789, 762, 731, 619, 544.

**HRMS**:  $m/z$  = 362.1438 ( $[\text{M}]^+$ ; calculated for  $\text{C}_{21}\text{H}_{26}\text{Cl}_2\text{N}^+$   $m/z$  = 362.1437).

### 2.2.11 Compound 15

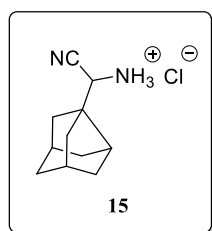

Starting material **3a** (100 mg, 0.5 mmol) was dissolved in dry 1,2,4-trichlorobenzene (8 mL) and 150 mg (2 equiv.) of freshly distilled anhydrous triflic acid was added to the solution at r.t. The reaction mixture was heated for 4 hours at 120 °C under inert atmosphere. Then the reaction mixture was cooled to -78 °C, it solidified, and TMSCN (250  $\mu$ L, 2 mmol), DMF (0.2 mL) and Et<sub>3</sub>N (0.2 mL) were added to the reaction mixture. The reaction mixture was let to warm up to r.t. and stirred at r.t. for 16h. The reaction was quenched with sat. solution of Na<sub>2</sub>CO<sub>3</sub>, the product, resulting amine, was extracted with Et<sub>2</sub>O. Combined organic fractions were dried over MgSO<sub>4</sub> and Et<sub>2</sub>O was evaporated under *vacuo*. To the solution of amine in 1,2,4-trichlorobenzene was added HCl in Et<sub>2</sub>O and the solvent from the resulting hydrochloric salt solution was evaporated under *vacuo* at elevated temperature. The product **15** was purified by crystallisation from EtOAc and obtained as colourless crystalline solid (82 mg) in 77% yield. *Please, note that if triflic acid is not anhydrous or the solvent is contaminated with water then the yield drops dramatically.*

**m.p.** (cryst. from EtOAc): 212.3 - 213.1 °C.

**<sup>1</sup>H NMR** (400 MHz, CDCl<sub>3</sub>):  $\delta$ /ppm = 1.61-1.85 (m, 13H), 2.26 (m, 1H), 2.31 (m, 2H), 3.72 (s, 1H).

**<sup>13</sup>C NMR** (101 MHz, CDCl<sub>3</sub>):  $\delta$ /ppm = 35.2 (2CH<sub>2</sub>), 37.5 (CH), 41.6 (CH), 43.8 (CH<sub>2</sub>), 44.9 (CH<sub>2</sub>), 46.0 (2CH<sub>2</sub>), 50.5 (CH), 52.5 (C), 121.7 (C).

**IR** (neat):  $\tilde{\nu}$  /cm<sup>-1</sup> = 3386, 3321, 3195, 3195, 2935, 2866, 2669, 2580, 2225, 1716, 1660, 1481, 1458, 1369, 1336, 1306, 1242, 1215, 1130, 1093, 1078, 1063, 962, 947, 908, 862, 843, 781, 708, 638, 588, 523, 420.

**HRMS**:  $m/z$  = 177.1389 ([M]<sup>+</sup> calculated for C<sub>11</sub>H<sub>17</sub>N<sub>2</sub><sup>+</sup>  $m/z$  = 177.1386).



### 2.2.12 Compound 16

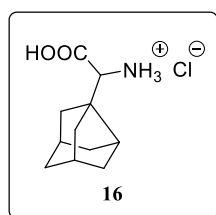

Starting material **15** (80 mg, 0.38 mmol) was dissolved in concentrated hydrochloric acid (2 mL) and stirred at 100 °C for 36 hours. Then the solution was neutralised using sodium hydroxide and the water was evaporated under *vacuo*. Then the compound was extracted with methanol and converted using HCl/Et<sub>2</sub>O to hydrochloric salt. The compound **16** was obtained as colourless solid (71 mg) in 79% yield.

**m.p.** (cryst. from MeOH): 293.5 - 294.3 °C

**<sup>1</sup>H NMR** (400 MHz, CD<sub>3</sub>OD):  $\delta$ /ppm = 1.57-1.88 (m, 10H), 2.27 (m, 2H), 2.58-2.61 (m, 1H), 4.05 (s, 1H).

**<sup>13</sup>C NMR** (101 MHz, CD<sub>3</sub>OD):  $\delta$ /ppm = 35.7 (CH<sub>2</sub>), 38.3 (CH), 38.7 (CH), 43.2 (CH), 44.3 (CH<sub>2</sub>), 44.4 (CH<sub>2</sub>), 46.3 (CH<sub>2</sub>), 46.7 (CH<sub>2</sub>), 50.9 (C), 60.2 (CH), 170.0 (C).

**IR** (neat):  $\tilde{\nu}$  /cm<sup>-1</sup> = 3465, 3311 3167, 2914, 2866, 2848, 2667, 2542, 2359, 2189, 1712, 1595, 1576, 1520, 1458, 1402, 1336, 1100, 1269, 1250, 1178, 1165, 1092, 1030, 985, 955, 837, 779, 640, 563, 532, 513.

**HRMS**:  $m/z$  = 196.1331 ([M]<sup>+</sup>; calculated for C<sub>11</sub>H<sub>18</sub>NO<sub>2</sub><sup>+</sup>  $m/z$  = 196.1333).

### 2.2.13 Compound 17

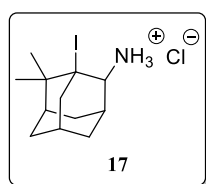

Starting material **3e** (663 mg, 3 mmol) was dissolved in anhydrous dichloromethane (3 mL) in sealed tube and 2 equiv. of KI (6 mmol, 996 mg) were added to the solution. To the resulting suspension TfOH (1050 mg, 0.617 mL, 4 equiv.) was added and the tube was quickly closed. The reaction mixture was heated to 40 °C and stirred at this temperature for 16 hours. Then the reaction mixture was cooled to 0 °C and poured in cold sodium carbonate water solution and Et<sub>2</sub>O. The compound was extracted as a free base with cold Et<sub>2</sub>O, dried over MgSO<sub>4</sub> and transformed into hydrochloric salt using cold HCl in Et<sub>2</sub>O and filtered off as product **17** (450 mg, 44% yield). *Please note that all transformations with free amine of 17 must be performed at low temperatures.*

**m.p.** (cryst. from EtOAc): 207.5 – 208.9 °C

**<sup>1</sup>H NMR** (400 MHz, CD<sub>3</sub>OD): δ/ppm = 1.30 (s, 3H), 1.39 (s, 3H), 1.68-1.94 (m, 6H), 2.25-2.34 (m, 3H), 2.73-2.78 (m, 1H), 2.92-2.98 (m, 1H), 4.21-4.22 (m, 1H).

**<sup>13</sup>C NMR** (101 MHz, CD<sub>3</sub>OD): δ/ppm = 28.8 (CH<sub>3</sub>), 29.4 (CH<sub>3</sub>), 30.8 (CH<sub>2</sub>), 32.9 (CH<sub>2</sub>), 33.2 (CH<sub>2</sub>), 33.9 (CH), 36.1 (CH), 40.1 (CH), 42.4 (CH<sub>2</sub>), 45.9 (C), 60.8 (CH), 66.7 (C).

**IR** (neat):  $\tilde{\nu}$  /cm<sup>-1</sup> = 3178, 3057, 2989, 2910, 2864, 2725, 2629, 2559, 1948, 1587, 1522, 1485, 1466, 1367, 1315, 1232, 1130, 1030, 1001, 985, 945, 922, 870, 822, 802, 727, 669, 602, 526, 492, 420.

**HRMS**: m/z = 306.0714 ([M]<sup>+</sup>; calculated for C<sub>12</sub>H<sub>21</sub>IN<sup>+</sup> m/z = 306.0714).

### 2.2.14 Compound 18

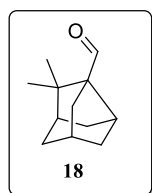

Starting material **17** (156 mg, 0.5 mmol) was placed in 1,4-dioxane (2 mL) and K<sub>2</sub>CO<sub>3</sub> (5 equiv.) was added, followed by 4 mL of water. The reaction was heated for 80 °C for 1h and then the product was extracted with diethylether. Diethylether phase was washed with HCl/water solution to remove the side product, then it was washed with water and then the organic fraction was dried over MgSO<sub>4</sub>. The product **18** was concentrated *in vacuo* and obtained as colourless non-crystalline solid (53 mg) in 60% yield.

**<sup>1</sup>H NMR** (400 MHz, CDCl<sub>3</sub>): δ/ppm = 1.03 (s, 3H), 1.18 (s, 3H), 1.40-1.50 (m, 3H), 1.65 (m, 3H), 1.87-1.91 (m, 1H), 2.14-2.25 (m, 3H), 2.73-2.76 (m, 1H), 9.83 (m, 1H).

**<sup>13</sup>C NMR** (101 MHz, CDCl<sub>3</sub>): δ/ppm = 22.7 (CH<sub>3</sub>), 27.2 (CH<sub>3</sub>), 32.0 (CH<sub>2</sub>), 36.1 (CH), 36.9 (CH<sub>2</sub>), 40.2 (CH<sub>2</sub>), 44.4 (CH<sub>2</sub>), 47.5 (C), 47.7 (CH), 65.3 (CH), 77.4 (C), 205.88 (CH).

Analytical data of compound **18** are in agreement with the reported in publication Zonker, B.; Becker, J.; Hrdina, R. *Org. Biomol. Chem.* **2021**, *19*, 4027-4031.

### 2.2.15 Compound 19

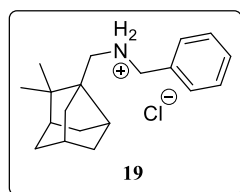

Starting material **18** (40 mg, 0.22 mmol) was mixed with benzylamine (25 mg, 0.22 mmol, 1 equiv.) and stirred in anhydrous dichloromethane (1 mL) with anhydrous MgSO<sub>4</sub> (120 mg) at r.t. for 24 hours. Then the solution was filtered concentrated *in vacuo*, dissolved in THF 1 mL

and dropwise added to LiAlH<sub>4</sub> suspension and stirred at r.t. for additional 3 hours. Then the reaction was quenched with water and the product was extracted using Et<sub>2</sub>O. Combined organic fractions were dried over MgSO<sub>4</sub> and the product was concentrated *in vacuo*. Then followed the addition of HCl in Et<sub>2</sub>O and the product as hydrochloric salt was filtered off. Compound **x** was obtained as colourless solid (55 mg) in 82% yield.

**m.p.** (cryst. from EtOAc): sublimation of the sample at 200 °C

**<sup>1</sup>H NMR** (400 MHz, CD<sub>3</sub>Cl<sub>3</sub>): δ/ppm = 0.71 (s, 3H), 1.03 (s, 3H), 1.25-1.31 (m, 1H), 1.37-1.40 (m, 1H), 1.53-1.68 (m, 5H), 1.81-1.85 (m, 1H), 2.00-2.12 (m, 3H), 2.20 (m, 1H), 2.31-2.34 (m, 1H), 2.70-2.85 (m, 2H), 7.37-7.44 (m, 3H), 7.69-7.71 (m, 2H), 9.31 (bs, 2H)

**<sup>13</sup>C NMR** (101 MHz, CD<sub>3</sub>Cl<sub>3</sub>): δ/ppm = 22.0 (CH<sub>3</sub>), 26.7 (CH<sub>3</sub>), 32.0 (CH<sub>2</sub>), 36.9 (CH), 38.7 (CH<sub>2</sub>), 40.2 (CH<sub>2</sub>), 42.8 (CH), 44.8 (CH<sub>2</sub>), 46.6 (C), 47.5 (CH), 48.9 (CH<sub>2</sub>), 51.4 (C), 51.8 (CH<sub>2</sub>), 129.4 (CH), 129.5 (CH), 130.6 (CH), 130.7 (C).

**IR** (neat):  $\tilde{\nu}$  /cm<sup>-1</sup> = 3338, 3037, 2918, 2856, 2777, 2655, 2453, 1655, 1460, 1441, 1419, 1369, 1277, 1211, 1117, 1103, 1080, 1016, 976, 941, 930, 800, 748, 696, 584, 505, 482, 418.

**HRMS**: m/z = 270.2221 ([M]<sup>+</sup>; calculated for C<sub>19</sub>H<sub>28</sub>N<sup>+</sup> m/z = 270.2216).

## 2.2.16 Compound 23

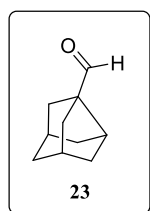

Starting material 1-iodo-2-amino adamantane hydrochloride (100 mg, 0.32 mmol) was placed in 1,4-dioxane 2 mL and K<sub>2</sub>CO<sub>3</sub> (250 mg, 5 equiv.) was added, followed by 4 mL of water. The reaction was heated for 80 °C for 1h and then the product was extracted with diethylether. Diethylether phase was washed with HCl/water solution to remove the side product, then it was washed with water and then the organic fraction was dried over MgSO<sub>4</sub>. The product **23** was concentrated *in vacuo* and obtained as colourless noncrystalline solid (20 mg) in 42% yield.

*Please, note, compound 23 is volatile.*

**<sup>1</sup>H NMR** (400 MHz, CDCl<sub>3</sub>): δ/ppm = 1.61-1.76 (m, 8H), 2.01-2.04 (m, 2H), 2.36 (m, 2H), 2.57-2.6 (m, 1H), 9.73 (s, 1H).

**<sup>13</sup>C NMR** (101 MHz, CDCl<sub>3</sub>): δ/ppm = 35.4 (2CH<sub>2</sub>), 37.5 (2CH), 42.1 (CH), 43.7 (2CH<sub>2</sub>), 43.7 (2CH<sub>2</sub>), 60.4 (C), 205.4 (COH).

Analytical data for compound **23** are in agreement with the reported in publication Zonker, B.; Becker, J.; Hrdina, R. *Org. Biomol. Chem.* **2021**, *19*, 4027-4031.

### 2.2.17 Compound 24

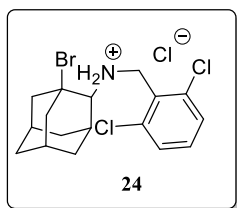

Starting material **4ab** (175 mg, 0.5 mmol) was dissolved in anhydrous 1,2,4-trichlorobenzene (2 mL) in sealed tube and 3 equiv. of KBr (1.5 mmol, 178 mg) were added to the solution. Then the suspension was cooled down and solidified, then TfOH (300 mg, 176  $\mu$ L, 4 equiv.) was added and the tube was closed before the HBr gas started to evolve. The reaction mixture was heated to 150  $^{\circ}$ C and stirred at this temperature for 16 hours. Then the reaction mixture was cooled to 0  $^{\circ}$ C and poured in cold sodium carbonate water solution and Et<sub>2</sub>O. The compound was extracted as a free base with cold Et<sub>2</sub>O, dried over MgSO<sub>4</sub> and concentrated at low r.t. Followed short pad chromatography on silica gel using hexane: EtOAc (4:1) as a mobile phase. The compound was concentrated *in vacuo* at r.t. and using HCl in ether transformed into hydrochloric salt and filtered off as product **24** (188 mg) in 88% yield.

**m.p.** (cryst. from EtOAc): 184.6 - 185.1  $^{\circ}$ C

**<sup>1</sup>H NMR** (400 MHz, CDCl<sub>3</sub>):  $\delta$ /ppm = 1.66-1.80 (m, 5H), 1.98-2.25 (m, 5H), 2.46-2.49 (m, 1H), 2.74-2.88 (m, 2H), 3.04 (m, 2H), 4.56 (m, 1H), 4.91 (m, 1H), 7.35-7.39 (m, 1H), 7.43-7.45 (m, 2H).

**<sup>13</sup>C NMR** (101 MHz, CDCl<sub>3</sub>):  $\delta$ /ppm = 29.3 (CH<sub>2</sub>), 31.7 (CH), 31.9 (CH), 32.4 (CH), 35.3 (CH<sub>2</sub>), 36.2 (CH<sub>2</sub>), 42.9 (CH<sub>2</sub>), 44.8 (CH<sub>2</sub>), 49.6 (C), 67.3 (CH), 129.3 (CH), 137.1 (2CH), 129.3 (2C), 137.1 (1C).

**IR** (neat):  $\tilde{\nu}$ /cm<sup>-1</sup> = 3323, 3163, 2912, 2852, 2627, 2312, 1711, 1579, 1562, 1464, 1435, 1342, 1194, 1146, 1119, 1093, 1032, 1022, 987, 939, 841, 825, 769, 721, 687, 638, 613, 509, 484, 428.

**HRMS**:  $m/z$  = 388.0227 ([M]<sup>+</sup>; calculated for C<sub>17</sub>H<sub>21</sub>BrCl<sub>2</sub>N<sup>+</sup>  $m/z$  = 388.0229).

### 2.2.18 Compound 25

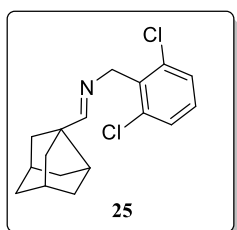



### 3. Kinetic studies

Preacquisition delayed experiments were measured with Varian Inova 400 MHz instrument equipped with an ASW4NUC probe. Experiments were carried out at various temperatures (25, 40, 50, 60, 70, 80 °C) and accurate values (25.2, 40.6, 51.7, 61.7, 72.7, 83.6 with  $\pm 0.30$  °C error)<sup>1</sup> were obtained by temperature calibrating experiments with 80% glycol in DMSO-*d*6. Low quality of spectra was caused by many factors and technical limitations of the spectrometer. Experiments were carried out in a mixture of two deuterated solvents (dioxane-*d*8 1:4 D<sub>2</sub>O), with highly diluted reactant and high ionic strength due to presence of inorganic salts (KCl, K<sub>2</sub>CO<sub>3</sub>). These conditions correspond to experimental conditions used during synthesis. Shimming was done in the presence of similar NMR tube with the same solvent ionic strength therefore the homogeneity of the magnetic field could not be ideal. Standard shimming procedure could not be used because of its time demands and the fast kinetics of the measured reaction at higher temperatures. All data were processed with MestRenova 12.0.3 and integral values were obtained by stacked spectra automatization. Combination of lower signal to noise ratio and processing automatization burdened integral with some error. Data were processed in term of time (experiments in the NMR spectrometer were started after some delay), values of integrals (to avoid negative concentration because of “integral values of noise”) and values of integrals were substituted and normalized by starting concentration. Chemical shifts change their values with temperature and pH of the solution. Labels are with the same chemical shifts across all tables for simplification. Usual chemical shifts from highest to lowest: product (8.9 ppm), intermediate product (7.0 ppm), starting material (2.25 ppm), side product (2.0 ppm) (marked red in Scheme 1).

Scheme 1 Simplified model for kinetic studies

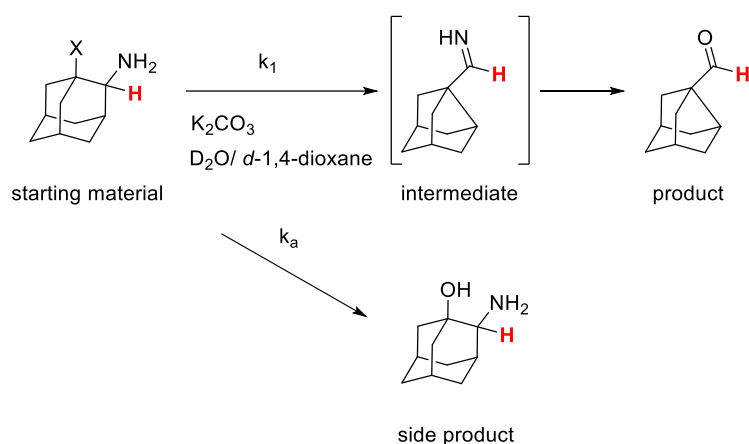

<sup>1</sup> <http://chem.ch.huji.ac.il/nmr/software/thermometer.html>

## KIN-25-Iodo

Derivative: X=Iodo Concentration: 53 mM

Base: 5 equiv. Temperature: 25 °C

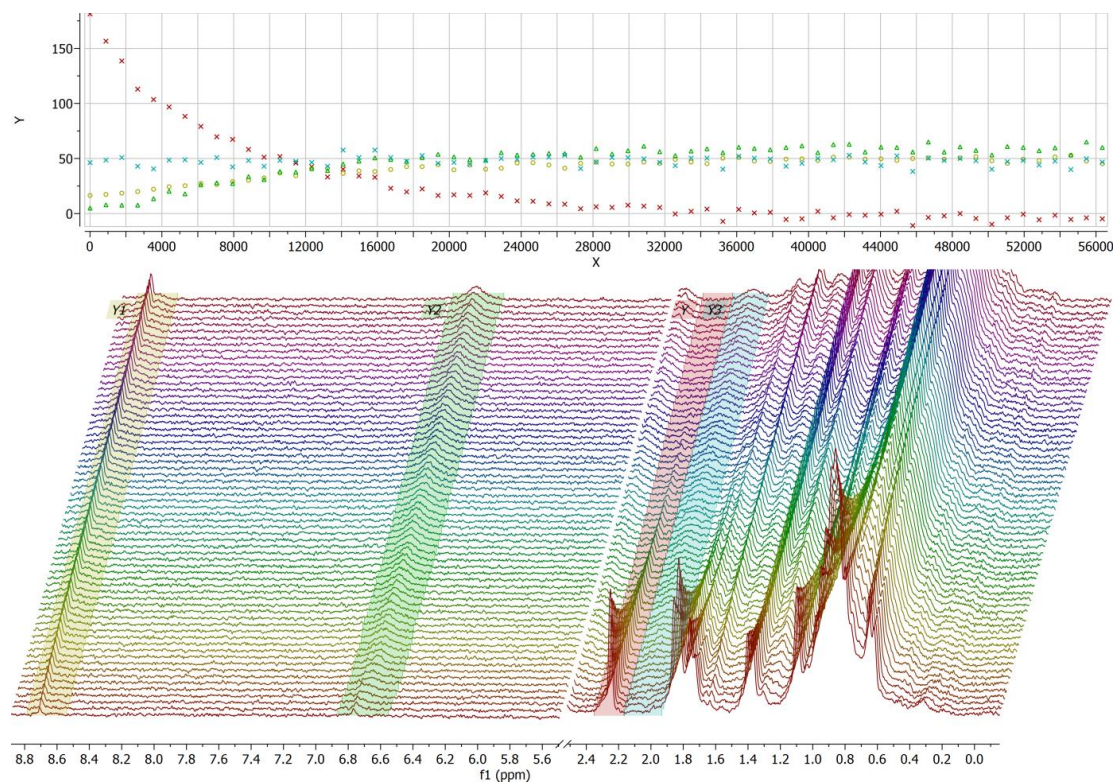

Fig. 1 Mestrenova - Iodo 25 °C

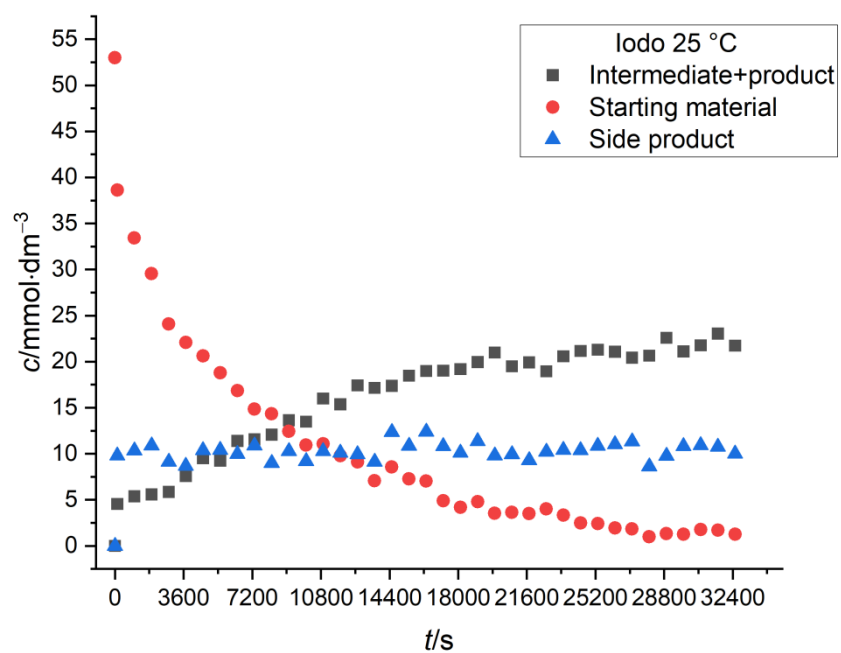

Fig. 2 Processed graph – Iodo 25 °C

Table 1 Raw data – integral values – Iodo 25 °C

| Time/s | 25 °C              |                                 |                                |                              |                         |
|--------|--------------------|---------------------------------|--------------------------------|------------------------------|-------------------------|
|        | product (8.92 ppm) | intermediate product (7.00 ppm) | product + intermediate product | starting material (2.25 ppm) | side product (1.99 ppm) |
| 0      | 16.3               | 5.0                             | 21.3                           | 181.1                        | 46.0                    |
| 900    | 17.2               | 8.0                             | 25.2                           | 156.6                        | 48.6                    |
| 1800   | 18.4               | 7.8                             | 26.2                           | 138.5                        | 51.0                    |
| 2700   | 19.9               | 7.5                             | 27.5                           | 112.9                        | 42.8                    |
| 3600   | 22.0               | 13.6                            | 35.5                           | 103.4                        | 40.6                    |
| 4500   | 24.4               | 20.2                            | 44.6                           | 96.7                         | 48.6                    |
| 5400   | 25.3               | 17.9                            | 43.2                           | 88.1                         | 48.8                    |
| 6300   | 27.2               | 26.2                            | 53.4                           | 79.1                         | 46.8                    |
| 7200   | 26.3               | 27.9                            | 54.2                           | 69.6                         | 51.0                    |
| 8100   | 29.2               | 27.4                            | 56.6                           | 67.2                         | 42.2                    |
| 9000   | 30.3               | 33.6                            | 63.9                           | 58.3                         | 48.1                    |
| 9900   | 32.3               | 30.8                            | 63.2                           | 51.3                         | 43.0                    |
| 10800  | 36.7               | 38.2                            | 74.9                           | 51.9                         | 48.2                    |
| 11700  | 34.5               | 37.5                            | 72.0                           | 45.8                         | 47.4                    |
| 12600  | 40.7               | 40.9                            | 81.6                           | 42.7                         | 46.5                    |
| 13500  | 41.2               | 39.2                            | 80.4                           | 33.2                         | 42.7                    |
| 14400  | 36.4               | 45.0                            | 81.4                           | 40.2                         | 57.9                    |
| 15300  | 38.9               | 47.7                            | 86.6                           | 34.2                         | 51.0                    |
| 16200  | 38.3               | 50.6                            | 88.9                           | 32.9                         | 58.0                    |
| 17100  | 40.0               | 49.1                            | 89.1                           | 23.0                         | 50.8                    |
| 18000  | 42.7               | 47.2                            | 89.9                           | 19.7                         | 47.4                    |
| 18900  | 42.6               | 50.9                            | 93.5                           | 22.4                         | 53.3                    |
| 19800  | 44.5               | 53.8                            | 98.3                           | 16.6                         | 46.0                    |
| 20700  | 39.8               | 51.5                            | 91.3                           | 17.1                         | 46.5                    |
| 21600  | 44.2               | 49.1                            | 93.4                           | 16.4                         | 43.6                    |
| 22500  | 40.4               | 48.4                            | 88.8                           | 18.8                         | 47.9                    |
| 23400  | 41.2               | 55.2                            | 96.4                           | 15.6                         | 48.8                    |
| 24300  | 46.0               | 53.2                            | 99.2                           | 11.7                         | 48.7                    |
| 25200  | 46.0               | 53.8                            | 99.8                           | 11.3                         | 50.9                    |
| 26100  | 44.2               | 54.6                            | 98.8                           | 9.1                          | 51.7                    |
| 27000  | 41.2               | 54.5                            | 95.7                           | 8.6                          | 53.1                    |
| 27900  | 45.6               | 51.2                            | 96.7                           | 4.6                          | 40.4                    |
| 28800  | 46.8               | 59.1                            | 105.8                          | 6.2                          | 45.7                    |
| 29700  | 44.9               | 54.0                            | 98.9                           | 5.9                          | 50.8                    |
| 30600  | 45.0               | 57.0                            | 102.0                          | 8.3                          | 51.3                    |
| 31500  | 46.9               | 61.1                            | 108.0                          | 7.9                          | 50.4                    |



|       |      |      |       |      |      |
|-------|------|------|-------|------|------|
| 32400 | 45.7 | 56.2 | 101.9 | 6.0  | 46.9 |
| 33300 | 49.0 | 52.6 | 101.6 | 1.1  | 43.5 |
| 34200 | 46.7 | 56.8 | 103.6 | 2.8  | 51.0 |
| 35100 | 45.3 | 58.7 | 104.0 | 4.8  | 50.9 |
| 36000 | 50.4 | 55.3 | 105.7 | -5.9 | 40.8 |
| 36900 | 50.9 | 60.4 | 111.3 | 2.2  | 52.5 |
| 37800 | 47.7 | 59.0 | 106.7 | 2.8  | 50.6 |
| 38700 | 47.4 | 58.0 | 105.4 | 4.2  | 49.7 |
| 39600 | 49.3 | 60.0 | 109.4 | -2.3 | 43.1 |
| 40500 | 49.5 | 61.4 | 111.0 | -1.3 | 45.6 |
| 41400 | 48.2 | 55.4 | 103.6 | 1.5  | 50.4 |
| 42300 | 51.2 | 62.7 | 113.9 | -1.8 | 49.3 |
| 43200 | 51.1 | 63.1 | 114.2 | 0.9  | 53.3 |
| 44100 | 49.4 | 55.9 | 105.4 | 0.9  | 47.1 |
| 45000 | 49.6 | 60.3 | 109.8 | 0.0  | 43.6 |
| 45900 | 48.1 | 60.0 | 108.1 | 3.5  | 52.9 |
| 46800 | 49.9 | 55.9 | 105.8 | -7.6 | 38.0 |
| 47700 | 50.6 | 65.1 | 115.7 | 0.6  | 48.4 |
| 48600 | 49.5 | 55.8 | 105.3 | -0.2 | 47.5 |
| 49500 | 50.7 | 60.5 | 111.2 | 2.3  | 48.7 |
| 50400 | 51.9 | 57.3 | 109.1 | -2.4 | 47.1 |
| 51300 | 47.8 | 53.2 | 101.0 | -5.6 | 38.9 |
| 52200 | 45.6 | 60.8 | 106.4 | 0.6  | 46.3 |
| 53100 | 49.5 | 60.0 | 109.4 | 3.4  | 47.3 |
| 54000 | 48.3 | 57.1 | 105.4 | -5.3 | 44.2 |
| 54900 | 51.5 | 59.7 | 111.1 | -1.5 | 48.6 |
| 55800 | 52.9 | 53.2 | 106.1 | -5.5 | 40.5 |
| 56700 | 47.6 | 65.0 | 112.6 | -4.4 | 50.2 |
| 57600 | 45.3 | 60.0 | 105.4 | -3.3 | 47.1 |

Table 2 Processed data – Iodo 25 °C

| Time/s | Processed data - concentration normalization |                                    |                                   |                                 |                            |
|--------|----------------------------------------------|------------------------------------|-----------------------------------|---------------------------------|----------------------------|
|        | 25 °C                                        |                                    |                                   |                                 |                            |
|        | product (8.92 ppm)/mM                        | intermediate product (7.00 ppm)/mM | product + intermediate product/mM | starting material (2.25 ppm)/mM | side product (1.99 ppm)/mM |
| 120    | 3.5                                          | 1.1                                | 4.6                               | 38.6                            | 9.8                        |
| 1020   | 3.7                                          | 1.7                                | 5.4                               | 33.4                            | 10.4                       |
| 1920   | 3.9                                          | 1.7                                | 5.6                               | 29.6                            | 10.9                       |
| 2820   | 4.2                                          | 1.6                                | 5.9                               | 24.1                            | 9.1                        |
| 3720   | 4.7                                          | 2.9                                | 7.6                               | 22.1                            | 8.7                        |
| 4620   | 5.2                                          | 4.3                                | 9.5                               | 20.6                            | 10.4                       |
| 5520   | 5.4                                          | 3.8                                | 9.2                               | 18.8                            | 10.4                       |
| 6420   | 5.8                                          | 5.6                                | 11.4                              | 16.9                            | 10.0                       |
| 7320   | 5.6                                          | 5.9                                | 11.6                              | 14.9                            | 10.9                       |
| 8220   | 6.2                                          | 5.8                                | 12.1                              | 14.3                            | 9.0                        |
| 9120   | 6.5                                          | 7.2                                | 13.6                              | 12.4                            | 10.3                       |
| 10020  | 6.9                                          | 6.6                                | 13.5                              | 10.9                            | 9.2                        |
| 10920  | 7.8                                          | 8.1                                | 16.0                              | 11.1                            | 10.3                       |
| 11820  | 7.4                                          | 8.0                                | 15.4                              | 9.8                             | 10.1                       |
| 12720  | 8.7                                          | 8.7                                | 17.4                              | 9.1                             | 9.9                        |
| 13620  | 8.8                                          | 8.4                                | 17.1                              | 7.1                             | 9.1                        |
| 14520  | 7.8                                          | 9.6                                | 17.4                              | 8.6                             | 12.3                       |
| 15420  | 8.3                                          | 10.2                               | 18.5                              | 7.3                             | 10.9                       |
| 16320  | 8.2                                          | 10.8                               | 19.0                              | 7.0                             | 12.4                       |
| 17220  | 8.5                                          | 10.5                               | 19.0                              | 4.9                             | 10.8                       |
| 18120  | 9.1                                          | 10.1                               | 19.2                              | 4.2                             | 10.1                       |
| 19020  | 9.1                                          | 10.9                               | 19.9                              | 4.8                             | 11.4                       |
| 19920  | 9.5                                          | 11.5                               | 21.0                              | 3.5                             | 9.8                        |
| 20820  | 8.5                                          | 11.0                               | 19.5                              | 3.6                             | 9.9                        |
| 21720  | 9.4                                          | 10.5                               | 19.9                              | 3.5                             | 9.3                        |
| 22620  | 8.6                                          | 10.3                               | 18.9                              | 4.0                             | 10.2                       |
| 23520  | 8.8                                          | 11.8                               | 20.6                              | 3.3                             | 10.4                       |
| 24420  | 9.8                                          | 11.3                               | 21.2                              | 2.5                             | 10.4                       |
| 25320  | 9.8                                          | 11.5                               | 21.3                              | 2.4                             | 10.9                       |
| 26220  | 9.4                                          | 11.6                               | 21.1                              | 1.9                             | 11.0                       |
| 27120  | 8.8                                          | 11.6                               | 20.4                              | 1.8                             | 11.3                       |
| 28020  | 9.7                                          | 10.9                               | 20.6                              | 1.0                             | 8.6                        |
| 28920  | 10.0                                         | 12.6                               | 22.6                              | 1.3                             | 9.8                        |
| 29820  | 9.6                                          | 11.5                               | 21.1                              | 1.3                             | 10.8                       |
| 30720  | 9.6                                          | 12.2                               | 21.8                              | 1.8                             | 10.9                       |
| 31620  | 10.0                                         | 13.0                               | 23.0                              | 1.7                             | 10.7                       |

|       |     |      |      |      |      |
|-------|-----|------|------|------|------|
| 32520 | 9.7 | 12.0 | 21.7 | 1.3  | 10.0 |
| 0     | 0.0 | 0.0  | 0.0  | 53.0 | 0.0  |

\* Correction: + 2 minutes, slope + 0.0

## KIN-40-Iodo

Derivative: X= Iodo Concentration: 53 mM

Base: 5 equiv. Temperature: 40 °C

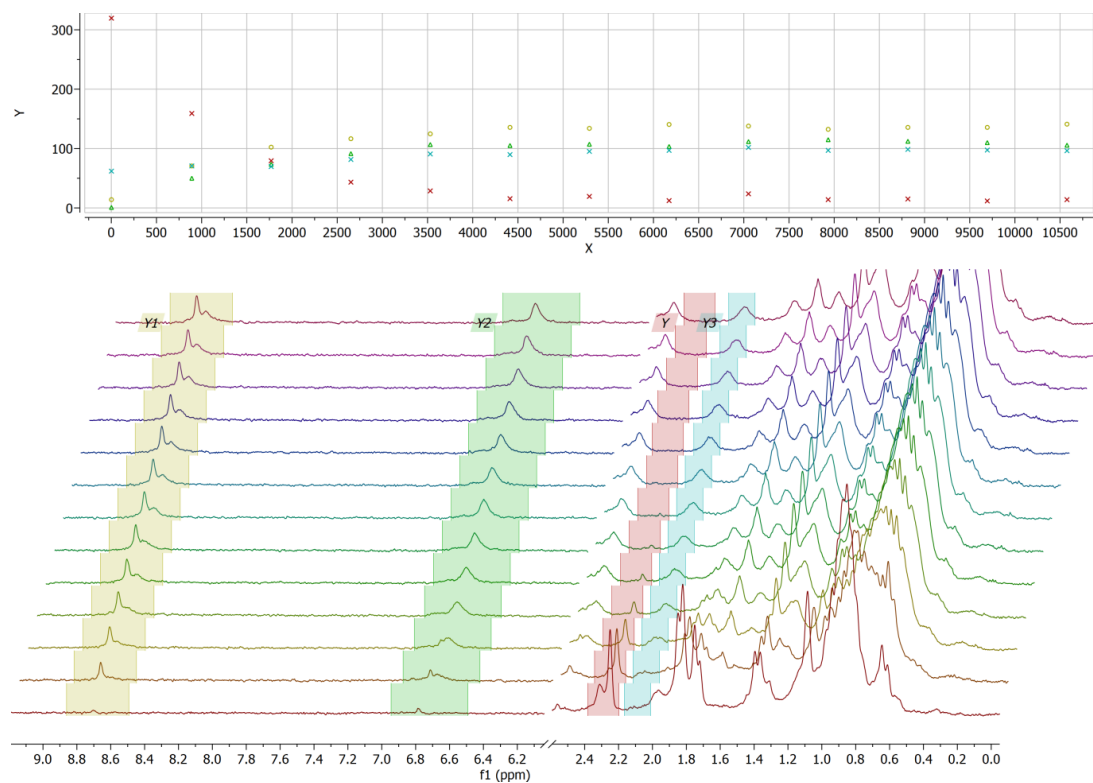

Fig. 3 Mestrenova - Iodo 40 °C

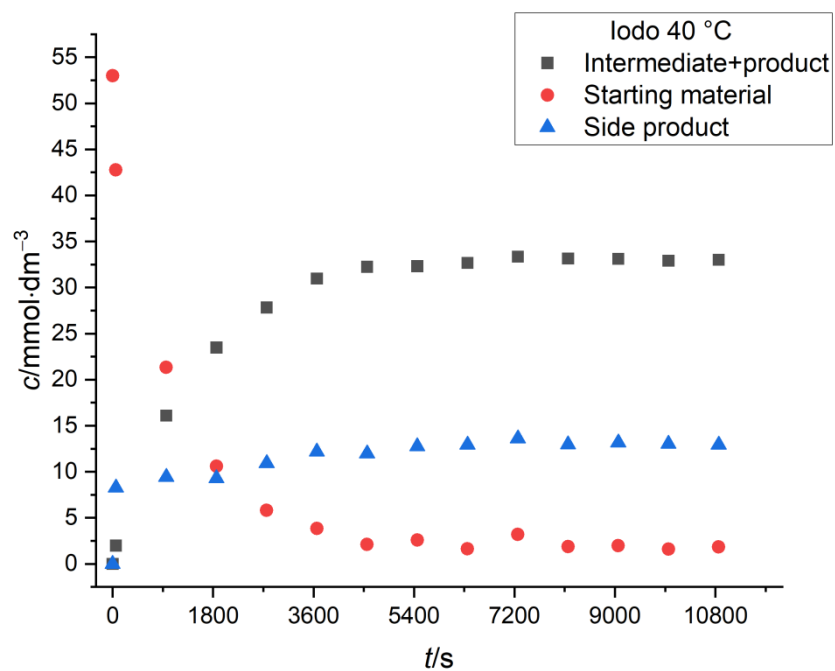

Fig. 4 Processed graph – Iodo 40 °C

Table 3 Raw data – integral values – Iodo 40 °C

| Time/s | 40 °C              |                                 |                                |                              |                         |
|--------|--------------------|---------------------------------|--------------------------------|------------------------------|-------------------------|
|        | product (8.92 ppm) | intermediate product (7.00 ppm) | product + intermediate product | starting material (2.25 ppm) | side product (1.99 ppm) |
| 0      | 13.9               | 0.9                             | 14.8                           | 319.4                        | 61.8                    |
| 900    | 70.4               | 49.8                            | 120.2                          | 159.4                        | 70.5                    |
| 1800   | 102.3              | 73.2                            | 175.4                          | 79.3                         | 69.4                    |
| 2700   | 116.8              | 91.2                            | 207.9                          | 43.5                         | 81.7                    |
| 3600   | 124.7              | 106.7                           | 231.4                          | 28.7                         | 91.1                    |
| 4500   | 135.7              | 105.3                           | 241.0                          | 15.8                         | 89.6                    |
| 5400   | 134.0              | 107.4                           | 241.4                          | 19.3                         | 95.4                    |
| 6300   | 140.6              | 103.5                           | 244.1                          | 12.3                         | 96.6                    |
| 7200   | 137.6              | 111.6                           | 249.2                          | 24.0                         | 101.8                   |
| 8100   | 132.5              | 115.1                           | 247.7                          | 13.9                         | 96.9                    |
| 9000   | 135.4              | 112.0                           | 247.4                          | 14.8                         | 98.3                    |
| 9900   | 135.8              | 110.1                           | 245.9                          | 11.8                         | 97.3                    |
| 10800  | 141.1              | 105.6                           | 246.7                          | 13.8                         | 96.5                    |

Table 4 Processed data – Iodo 40 °C

| Time/s | Processed data - concentration normalization |                                    |                                   |                                 |                            |
|--------|----------------------------------------------|------------------------------------|-----------------------------------|---------------------------------|----------------------------|
|        | 40 °C                                        |                                    |                                   |                                 |                            |
|        | product (8.92 ppm)/mM                        | intermediate product (7.00 ppm)/mM | product + intermediate product/mM | starting material (2.25 ppm)/mM | side product (1.99 ppm)/mM |
| 60     | 1.9                                          | 0.1                                | 2.0                               | 42.8                            | 8.3                        |
| 960    | 9.4                                          | 6.7                                | 16.1                              | 21.3                            | 9.4                        |
| 1860   | 13.7                                         | 9.8                                | 23.5                              | 10.6                            | 9.3                        |
| 2760   | 15.6                                         | 12.2                               | 27.8                              | 5.8                             | 10.9                       |
| 3660   | 16.7                                         | 14.3                               | 31.0                              | 3.8                             | 12.2                       |
| 4560   | 18.2                                         | 14.1                               | 32.3                              | 2.1                             | 12.0                       |
| 5460   | 17.9                                         | 14.4                               | 32.3                              | 2.6                             | 12.8                       |
| 6360   | 18.8                                         | 13.9                               | 32.7                              | 1.6                             | 12.9                       |
| 7260   | 18.4                                         | 14.9                               | 33.4                              | 3.2                             | 13.6                       |
| 8160   | 17.7                                         | 15.4                               | 33.1                              | 1.9                             | 13.0                       |
| 9060   | 18.1                                         | 15.0                               | 33.1                              | 2.0                             | 13.2                       |
| 9960   | 18.2                                         | 14.7                               | 32.9                              | 1.6                             | 13.0                       |
| 10860  | 18.9                                         | 14.1                               | 33.0                              | 1.9                             | 12.9                       |
| 0      | 0.0                                          | 0.0                                | 0.0                               | 53.0                            | 0.0                        |

\* Correction: + 1 minute, slope + 0.0

## KIN-50-Iodo

Derivative: X= Iodo Concentration: 53 mM

Base: 5 equiv. Temperature: 50 °C

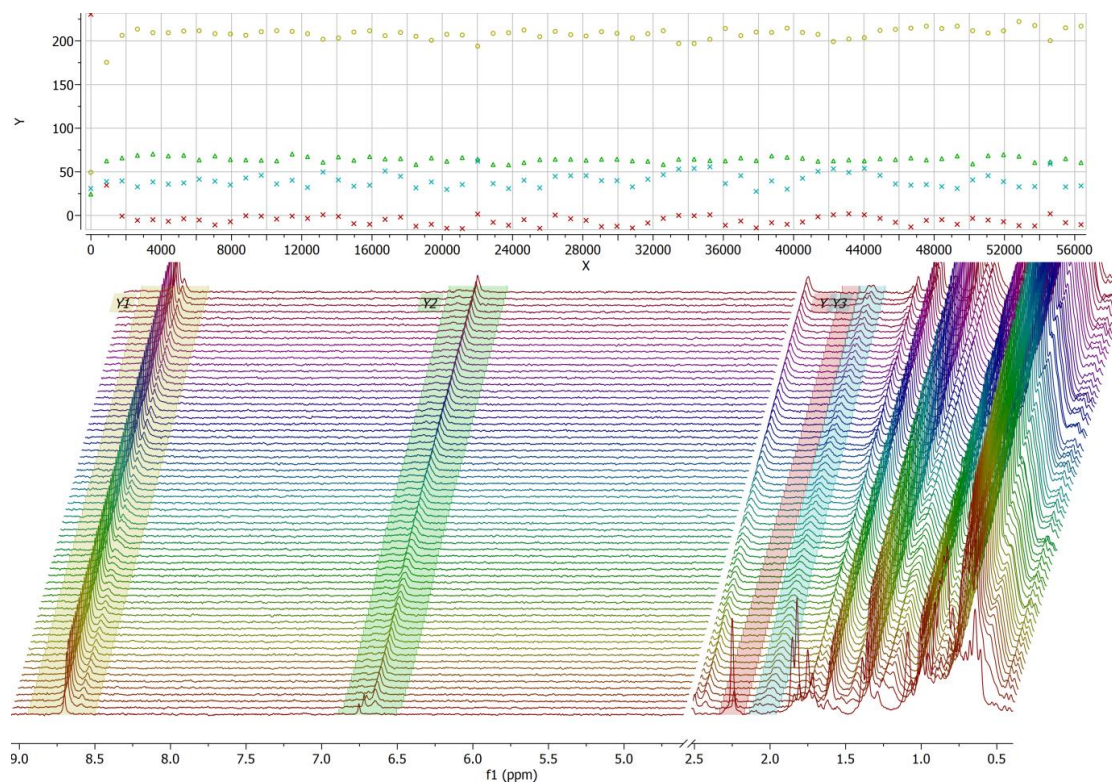

Fig. 5 Mestrenova - Iodo 50 °C

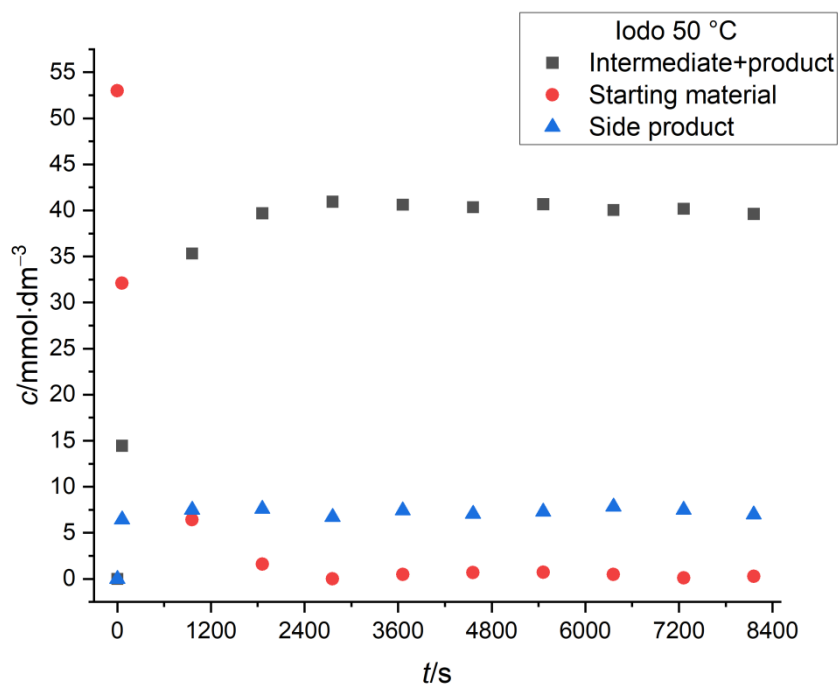

Fig. 6 Processed graph – Iodo 50 °C

Table 5 Raw data – integral values – Iodo 50 °C

| Time/s | 50 °C              |                                 |                                |                              |                         |
|--------|--------------------|---------------------------------|--------------------------------|------------------------------|-------------------------|
|        | product (8.92 ppm) | intermediate product (7.00 ppm) | product + intermediate product | starting material (2.25 ppm) | side product (1.99 ppm) |
| 0      | 49.3               | 24.5                            | 73.7                           | 232.7                        | 30.8                    |
| 900    | 175.5              | 62.6                            | 238.0                          | 30.4                         | 38.9                    |
| 1800   | 206.4              | 66.0                            | 272.4                          | -7.4                         | 39.7                    |
| 2700   | 213.4              | 68.9                            | 282.3                          | -20.0                        | 32.9                    |
| 3600   | 209.3              | 70.5                            | 279.7                          | -16.1                        | 38.6                    |
| 4500   | 209.5              | 68.2                            | 277.7                          | -14.5                        | 35.6                    |
| 5400   | 211.3              | 68.8                            | 280.1                          | -14.2                        | 37.4                    |
| 6300   | 211.5              | 63.7                            | 275.2                          | -16.2                        | 41.5                    |
| 7200   | 208.3              | 68.0                            | 276.3                          | -19.1                        | 39.1                    |
| 8100   | 207.8              | 64.0                            | 271.8                          | -17.7                        | 34.9                    |
| 9000   | 206.4              | 63.7                            | 270.1                          | -8.5                         | 42.9                    |
| 9900   | 210.7              | 63.3                            | 274.0                          | -8.5                         | 45.9                    |
| 10800  | 211.7              | 62.6                            | 274.3                          | -22.0                        | 36.0                    |
| 11700  | 210.8              | 70.4                            | 281.2                          | -10.0                        | 40.3                    |
| 12600  | 208.2              | 67.5                            | 275.7                          | -18.6                        | 31.8                    |
| 13500  | 201.7              | 60.9                            | 262.6                          | -11.4                        | 49.7                    |
| 14400  | 203.4              | 67.2                            | 270.5                          | -13.6                        | 40.6                    |
| 15300  | 210.3              | 63.4                            | 273.7                          | -13.3                        | 33.3                    |
| 16200  | 211.6              | 67.6                            | 279.2                          | -17.2                        | 34.5                    |
| 17100  | 205.9              | 64.7                            | 270.6                          | -11.2                        | 50.7                    |
| 18000  | 209.9              | 65.3                            | 275.2                          | -8.9                         | 44.7                    |
| 18900  | 205.3              | 58.2                            | 263.6                          | -21.0                        | 31.5                    |
| 19800  | 200.9              | 66.1                            | 267.0                          | -15.9                        | 38.6                    |
| 20700  | 207.5              | 62.0                            | 269.5                          | -22.2                        | 29.8                    |
| 21600  | 206.8              | 66.2                            | 273.0                          | -17.5                        | 35.3                    |
| 22500  | 194.0              | 64.4                            | 258.4                          | -3.9                         | 62.3                    |
| 23400  | 208.8              | 58.6                            | 267.3                          | -21.6                        | 36.7                    |
| 24300  | 209.3              | 57.9                            | 267.1                          | -19.7                        | 30.9                    |
| 25200  | 212.3              | 60.8                            | 273.2                          | -11.7                        | 40.2                    |
| 26100  | 204.9              | 64.1                            | 269.0                          | -23.5                        | 31.5                    |
| 27000  | 211.0              | 64.4                            | 275.4                          | -5.6                         | 44.7                    |
| 27900  | 207.2              | 64.3                            | 271.5                          | -4.4                         | 45.6                    |
| 28800  | 205.6              | 63.2                            | 268.7                          | -8.8                         | 45.5                    |
| 29700  | 210.4              | 64.5                            | 274.9                          | -13.3                        | 39.8                    |
| 30600  | 208.8              | 64.3                            | 273.1                          | -13.6                        | 40.0                    |
| 31500  | 203.3              | 62.4                            | 265.7                          | -16.7                        | 32.7                    |



|       |       |      |       |       |      |
|-------|-------|------|-------|-------|------|
| 32400 | 208.3 | 62.1 | 270.4 | -10.7 | 41.4 |
| 33300 | 211.7 | 58.4 | 270.1 | -4.7  | 46.7 |
| 34200 | 196.9 | 64.3 | 261.3 | -2.0  | 53.0 |
| 35100 | 197.1 | 64.3 | 261.3 | -1.7  | 53.7 |
| 36000 | 201.7 | 62.7 | 264.5 | -1.6  | 55.6 |
| 36900 | 214.3 | 62.6 | 276.9 | -13.6 | 36.7 |
| 37800 | 206.1 | 65.7 | 271.9 | -7.7  | 45.7 |
| 38700 | 210.2 | 63.0 | 273.2 | -16.3 | 27.4 |
| 39600 | 209.7 | 68.2 | 277.8 | -7.0  | 39.6 |
| 40500 | 214.5 | 66.5 | 281.0 | -11.0 | 30.1 |
| 41400 | 209.8 | 65.6 | 275.4 | -6.1  | 42.7 |
| 42300 | 207.4 | 62.0 | 269.4 | 0.9   | 50.4 |
| 43200 | 199.3 | 62.5 | 261.8 | 6.7   | 53.5 |
| 44100 | 202.2 | 63.7 | 265.9 | 6.4   | 49.2 |
| 45000 | 203.9 | 62.5 | 266.4 | 4.6   | 53.9 |
| 45900 | 212.1 | 65.0 | 277.1 | -1.5  | 45.8 |
| 46800 | 213.0 | 63.9 | 276.9 | -6.8  | 36.1 |
| 47700 | 214.7 | 66.0 | 280.8 | -11.7 | 34.5 |
| 48600 | 217.0 | 63.6 | 280.6 | -3.6  | 35.4 |
| 49500 | 214.3 | 65.2 | 279.5 | -7.8  | 33.2 |
| 50400 | 217.1 | 68.1 | 285.1 | -12.0 | 31.0 |
| 51300 | 211.5 | 59.2 | 270.7 | -2.1  | 40.7 |
| 52200 | 209.0 | 68.4 | 277.4 | -0.4  | 45.5 |
| 53100 | 211.5 | 69.8 | 281.3 | -4.5  | 38.7 |
| 54000 | 222.2 | 67.9 | 290.2 | -10.0 | 32.9 |
| 54900 | 217.6 | 60.4 | 278.0 | -11.2 | 33.0 |
| 55800 | 200.5 | 61.3 | 261.8 | 8.5   | 59.3 |
| 56700 | 215.1 | 65.2 | 280.4 | -6.0  | 32.8 |
| 57600 | 217.0 | 60.4 | 277.5 | -9.2  | 33.9 |

Table 6 Processed data –Iodo 50 °C

| Processed data - concentration normalization |                       |                                    |                                   |                                 |                            |
|----------------------------------------------|-----------------------|------------------------------------|-----------------------------------|---------------------------------|----------------------------|
| Time/s                                       | 50 °C                 |                                    |                                   |                                 |                            |
|                                              | product (8.92 ppm)/mM | intermediate product (7.00 ppm)/mM | product + intermediate product/mM | starting material (2.25 ppm)/mM | side product (1.99 ppm)/mM |
| 60                                           | 8.8                   | 5.6                                | 14.4                              | 32.1                            | 6.5                        |
| 960                                          | 24.8                  | 10.5                               | 35.3                              | 6.4                             | 7.5                        |
| 1860                                         | 28.8                  | 10.9                               | 39.7                              | 1.6                             | 7.6                        |
| 2760                                         | 29.7                  | 11.3                               | 40.9                              | 0.0                             | 6.7                        |
| 3660                                         | 29.1                  | 11.5                               | 40.6                              | 0.5                             | 7.4                        |
| 4560                                         | 29.2                  | 11.2                               | 40.4                              | 0.7                             | 7.1                        |
| 5460                                         | 29.4                  | 11.3                               | 40.7                              | 0.7                             | 7.3                        |
| 6360                                         | 29.4                  | 10.6                               | 40.0                              | 0.5                             | 7.8                        |
| 7260                                         | 29.0                  | 11.2                               | 40.2                              | 0.1                             | 7.5                        |
| 8160                                         | 28.9                  | 10.7                               | 39.6                              | 0.3                             | 7.0                        |
| 0                                            | 0.0                   | 0.0                                | 0.0                               | 53.0                            | 0.0                        |

\* Correction: + 1 minutes, slope + 20.0

## KIN-80-Iodo

Derivative: X= Iodo Concentration: 53 mM

Base: 5 equiv. Temperature: 80 °C

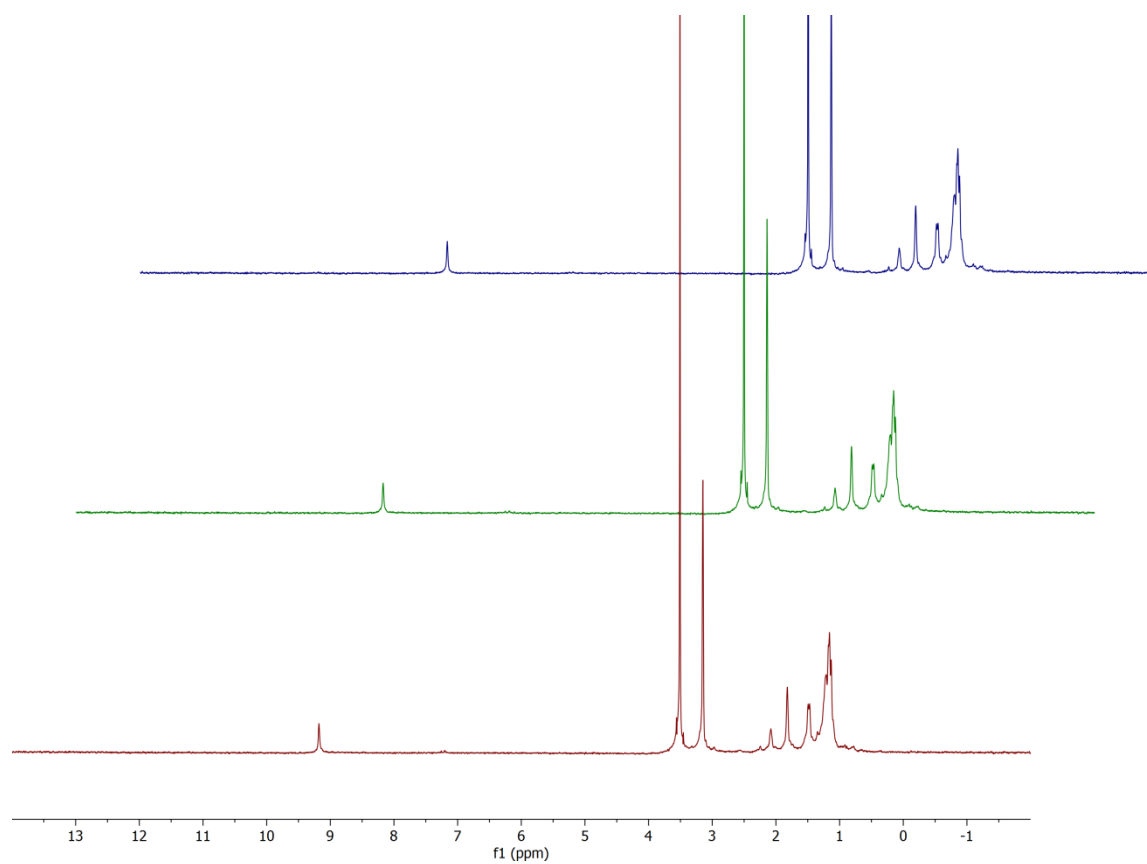

Fig. 7 Mestrenova - Iodo 80 °C

## KIN-40-Bromo

Derivative: X= Bromo

Concentration: 53 mM

Base: 5 equiv. Temperature: 40 °C

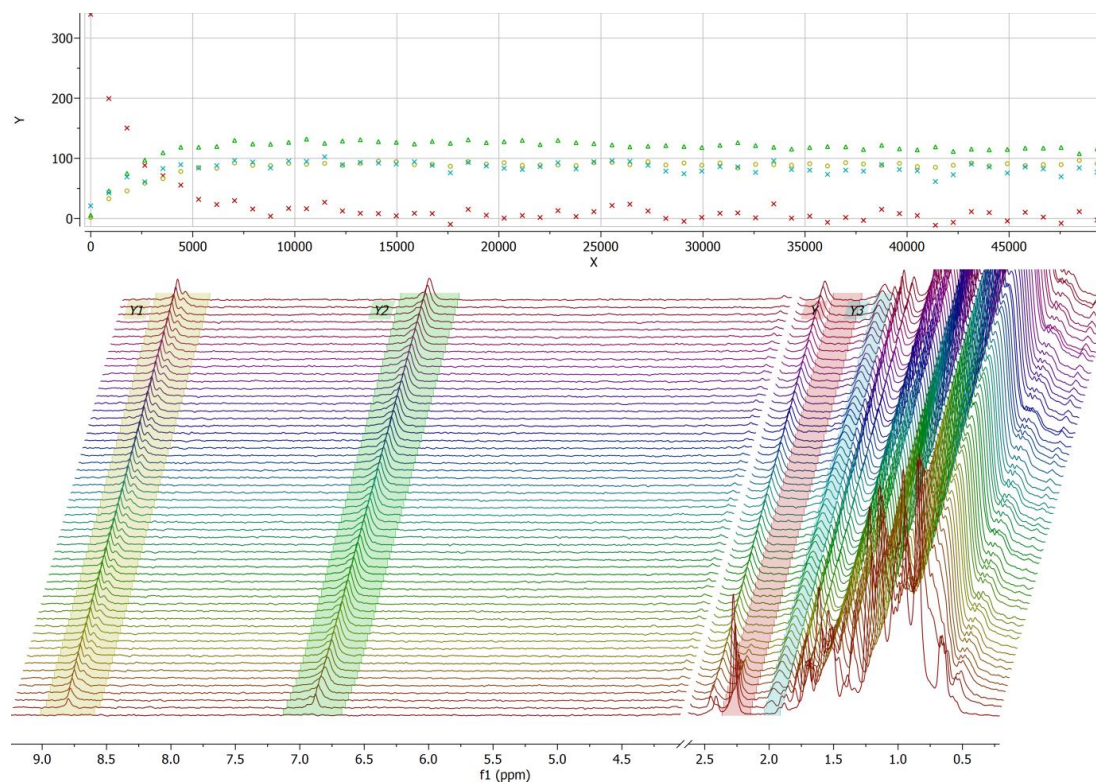

Fig. 8 Mestrenova - Bromo 40 °C

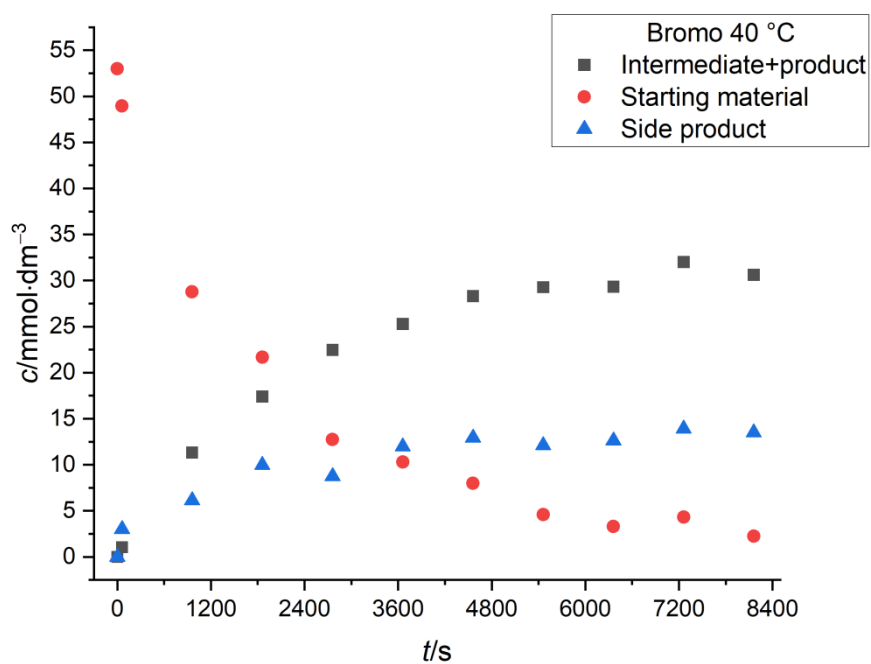

Fig. 9 Processed graph – Bromo 40 °C

Table 7 Raw data – integral values – Bromo 40 °C

| Time/s | 40 °C              |                                 |                                |                              |                         |
|--------|--------------------|---------------------------------|--------------------------------|------------------------------|-------------------------|
|        | product (8.92 ppm) | intermediate product (7.00 ppm) | product + intermediate product | starting material (2.25 ppm) | side product (1.99 ppm) |
| 0      | 1.6                | 5.7                             | 7.3                            | 339.5                        | 20.9                    |
| 900    | 32.7               | 45.9                            | 78.6                           | 199.5                        | 42.6                    |
| 1800   | 45.7               | 75.1                            | 120.8                          | 150.3                        | 69.2                    |
| 2700   | 58.7               | 97.1                            | 155.8                          | 88.4                         | 60.8                    |
| 3600   | 66.2               | 109.2                           | 175.5                          | 71.3                         | 83.0                    |
| 4500   | 77.9               | 118.5                           | 196.4                          | 55.4                         | 89.6                    |
| 5400   | 84.4               | 118.7                           | 203.1                          | 31.7                         | 84.1                    |
| 6300   | 83.7               | 119.8                           | 203.4                          | 22.9                         | 87.6                    |
| 7200   | 92.0               | 130.1                           | 222.1                          | 29.9                         | 96.5                    |
| 8100   | 88.5               | 123.9                           | 212.4                          | 15.6                         | 93.8                    |
| 9000   | 87.7               | 123.2                           | 210.9                          | 3.6                          | 84.1                    |
| 9900   | 91.5               | 126.6                           | 218.1                          | 16.9                         | 95.3                    |
| 10800  | 89.8               | 132.1                           | 222.0                          | 16.4                         | 95.0                    |
| 11700  | 91.7               | 124.9                           | 216.6                          | 27.0                         | 102.2                   |
| 12600  | 88.6               | 128.6                           | 217.2                          | 12.3                         | 89.4                    |
| 13500  | 91.5               | 131.0                           | 222.5                          | 8.8                          | 93.3                    |
| 14400  | 95.6               | 127.8                           | 223.4                          | 8.1                          | 92.1                    |
| 15300  | 94.4               | 126.6                           | 221.0                          | 4.6                          | 90.7                    |
| 16200  | 89.5               | 124.0                           | 213.5                          | 8.9                          | 94.5                    |
| 17100  | 90.0               | 128.1                           | 218.1                          | 7.9                          | 88.6                    |
| 18000  | 87.0               | 125.2                           | 212.2                          | -9.5                         | 76.2                    |
| 18900  | 94.6               | 130.9                           | 225.4                          | 14.9                         | 93.1                    |
| 19800  | 90.7               | 126.2                           | 216.9                          | 5.5                          | 87.1                    |
| 20700  | 92.9               | 128.0                           | 220.9                          | 0.3                          | 83.3                    |
| 21600  | 88.4               | 129.8                           | 218.1                          | 5.2                          | 81.6                    |
| 22500  | 88.7               | 123.0                           | 211.6                          | 1.8                          | 86.5                    |
| 23400  | 88.8               | 129.8                           | 218.6                          | 13.2                         | 92.9                    |
| 24300  | 87.7               | 126.0                           | 213.7                          | 3.2                          | 82.5                    |
| 25200  | 92.8               | 124.6                           | 217.4                          | 11.6                         | 94.4                    |
| 26100  | 93.1               | 122.3                           | 215.4                          | 21.5                         | 95.8                    |
| 27000  | 89.4               | 119.3                           | 208.7                          | 24.0                         | 95.0                    |
| 27900  | 94.5               | 120.1                           | 214.7                          | 12.4                         | 88.5                    |
| 28800  | 88.7               | 121.3                           | 210.0                          | 0.2                          | 78.7                    |
| 29700  | 92.3               | 119.5                           | 211.8                          | -4.9                         | 74.5                    |
| 30600  | 88.6               | 118.1                           | 206.8                          | 1.5                          | 78.9                    |
| 31500  | 92.2               | 121.8                           | 214.0                          | 8.9                          | 86.3                    |

|       |      |       |       |       |      |
|-------|------|-------|-------|-------|------|
| 32400 | 84.2 | 126.3 | 210.4 | 9.1   | 85.8 |
| 33300 | 89.9 | 121.1 | 211.0 | 1.0   | 76.5 |
| 34200 | 89.2 | 118.5 | 207.7 | 24.1  | 96.0 |
| 35100 | 88.2 | 115.2 | 203.4 | 0.5   | 81.2 |
| 36000 | 90.8 | 117.8 | 208.7 | 4.0   | 80.1 |
| 36900 | 87.1 | 119.4 | 206.5 | -6.6  | 73.3 |
| 37800 | 92.5 | 119.0 | 211.5 | 1.9   | 80.6 |
| 38700 | 90.6 | 115.1 | 205.7 | -3.4  | 78.6 |
| 39600 | 88.3 | 121.7 | 209.9 | 15.2  | 89.5 |
| 40500 | 91.7 | 115.6 | 207.3 | 8.4   | 81.3 |
| 41400 | 86.3 | 114.4 | 200.7 | 4.8   | 79.0 |
| 42300 | 84.9 | 118.8 | 203.7 | -11.3 | 61.4 |
| 43200 | 88.3 | 111.8 | 200.1 | -6.3  | 72.8 |
| 44100 | 92.0 | 115.2 | 207.2 | 11.4  | 90.7 |
| 45000 | 87.5 | 114.3 | 201.8 | 9.8   | 85.9 |
| 45900 | 91.3 | 114.8 | 206.1 | -4.4  | 75.3 |
| 46800 | 87.7 | 117.1 | 204.8 | 10.3  | 85.9 |
| 47700 | 89.2 | 116.8 | 206.0 | 2.0   | 82.2 |
| 48600 | 89.5 | 118.2 | 207.7 | -8.2  | 69.4 |
| 49500 | 96.5 | 107.9 | 204.4 | 11.4  | 84.0 |
| 50400 | 91.1 | 115.7 | 206.8 | -2.6  | 76.9 |

Table 8 Processed data – Bromo 40 °C

| Time/s | Processed data - concentration normalization |                                    |                                   |                                 |                            |
|--------|----------------------------------------------|------------------------------------|-----------------------------------|---------------------------------|----------------------------|
|        | 40 °C                                        |                                    |                                   |                                 |                            |
|        | product (8.92 ppm)/mM                        | intermediate product (7.00 ppm)/mM | product + intermediate product/mM | starting material (2.25 ppm)/mM | side product (1.99 ppm)/mM |
| 60     | 0.2                                          | 0.8                                | 1.0                               | 48.9                            | 3.0                        |
| 960    | 4.7                                          | 6.6                                | 11.3                              | 28.8                            | 6.1                        |
| 1860   | 6.6                                          | 10.8                               | 17.4                              | 21.7                            | 10.0                       |
| 2760   | 8.5                                          | 14.0                               | 22.5                              | 12.7                            | 8.8                        |
| 3660   | 9.5                                          | 15.7                               | 25.3                              | 10.3                            | 12.0                       |
| 4560   | 11.2                                         | 17.1                               | 28.3                              | 8.0                             | 12.9                       |
| 5460   | 12.2                                         | 17.1                               | 29.3                              | 4.6                             | 12.1                       |
| 6360   | 12.1                                         | 17.3                               | 29.3                              | 3.3                             | 12.6                       |
| 7260   | 13.3                                         | 18.8                               | 32.0                              | 4.3                             | 13.9                       |
| 8160   | 12.8                                         | 17.9                               | 30.6                              | 2.2                             | 13.5                       |
| 0      | 0.0                                          | 0.0                                | 0.0                               | 53.0                            | 0.0                        |

\* Correction: + 1 minute, slope + 0.0

## KIN-50-Bromo

Derivative: X= Bromo

Concentration: 53 mM

Base: 5 equiv. Temperature: 50 °C

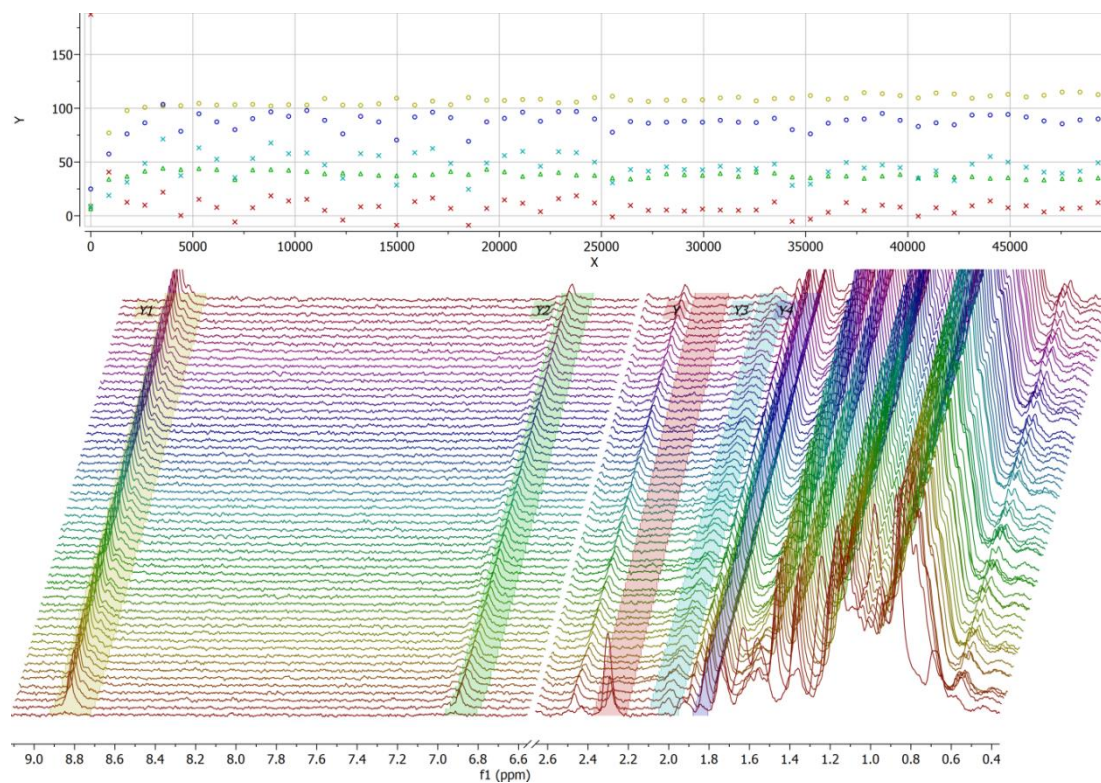

Fig. 10 Mestrenova - Bromo 50 °C

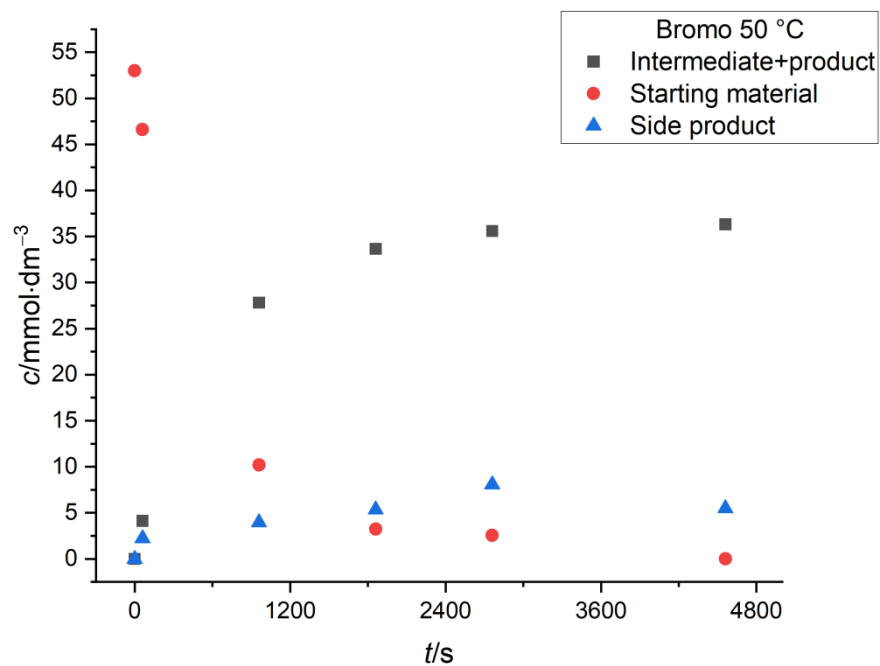

Fig. 11 Processed graph – Bromo 50 °C



Table 9 Raw data – integral values – Bromo 50 °C

| Time/s | 50 °C              |                                 |                                |                              |                         |
|--------|--------------------|---------------------------------|--------------------------------|------------------------------|-------------------------|
|        | product (8.92 ppm) | intermediate product (7.00 ppm) | product + intermediate product | starting material (2.25 ppm) | side product (1.99 ppm) |
| 0      | 9.2                | 6.4                             | 15.6                           | 187.5                        | 8.6                     |
| 900    | 77.1               | 34.1                            | 111.2                          | 40.6                         | 15.5                    |
| 1800   | 98.0               | 36.7                            | 134.7                          | 12.5                         | 21.1                    |
| 2700   | 100.9              | 41.6                            | 142.5                          | 9.8                          | 32.0                    |
| 3600   | 102.0              | 44.3                            | 146.3                          | 22.0                         | 46.6                    |
| 4500   | 102.5              | 43.0                            | 145.4                          | -0.5                         | 21.7                    |
| 5400   | 104.5              | 43.8                            | 148.3                          | 15.8                         | 40.1                    |
| 6300   | 103.0              | 42.9                            | 146.0                          | 7.7                          | 32.9                    |
| 7200   | 103.4              | 33.8                            | 137.2                          | -6.1                         | 20.9                    |
| 8100   | 103.5              | 42.7                            | 146.2                          | 21.4                         | 33.5                    |
| 9000   | 102.2              | 43.0                            | 145.1                          | 31.8                         | 43.2                    |
| 9900   | 103.3              | 42.5                            | 145.8                          | 20.2                         | 35.9                    |
| 10800  | 103.1              | 41.2                            | 144.3                          | 23.8                         | 36.7                    |
| 11700  | 109.2              | 39.1                            | 148.3                          | 14.6                         | 27.4                    |
| 12600  | 103.2              | 39.7                            | 142.9                          | -0.7                         | 21.3                    |
| 13500  | 102.7              | 39.1                            | 141.8                          | 21.5                         | 35.6                    |
| 14400  | 104.2              | 37.6                            | 141.8                          | 15.6                         | 35.6                    |
| 15300  | 109.2              | 37.2                            | 146.4                          | -12.0                        | 17.6                    |
| 16200  | 103.0              | 37.8                            | 140.7                          | 14.2                         | 38.0                    |
| 17100  | 106.5              | 38.6                            | 145.1                          | 17.6                         | 39.7                    |
| 18000  | 103.2              | 41.2                            | 144.4                          | 7.6                          | 32.5                    |
| 18900  | 109.8              | 38.6                            | 148.5                          | -9.0                         | 13.7                    |
| 19800  | 107.7              | 43.3                            | 151.0                          | 8.5                          | 32.1                    |
| 20700  | 107.3              | 40.8                            | 148.1                          | 16.3                         | 36.2                    |
| 21600  | 108.2              | 36.7                            | 144.9                          | 12.2                         | 39.3                    |
| 22500  | 108.4              | 38.8                            | 147.2                          | 3.8                          | 30.1                    |
| 23400  | 105.2              | 40.4                            | 145.5                          | 18.1                         | 39.7                    |
| 24300  | 105.8              | 37.9                            | 143.7                          | 19.8                         | 38.4                    |
| 25200  | 109.9              | 37.7                            | 147.6                          | 12.5                         | 33.5                    |
| 26100  | 111.2              | 35.3                            | 146.5                          | 0.3                          | 19.0                    |
| 27000  | 107.5              | 34.2                            | 141.7                          | 12.4                         | 27.7                    |
| 27900  | 106.2              | 35.5                            | 141.7                          | 7.0                          | 26.1                    |
| 28800  | 107.5              | 39.0                            | 146.5                          | 6.1                          | 29.4                    |
| 29700  | 107.1              | 38.3                            | 145.4                          | 6.4                          | 28.4                    |
| 30600  | 108.0              | 37.6                            | 145.6                          | 6.6                          | 28.2                    |
| 31500  | 109.6              | 39.5                            | 149.2                          | 7.2                          | 30.1                    |

|       |       |      |       |      |      |
|-------|-------|------|-------|------|------|
| 32400 | 110.3 | 36.8 | 147.1 | 5.9  | 29.1 |
| 33300 | 106.9 | 40.7 | 147.6 | 8.4  | 29.7 |
| 34200 | 109.1 | 39.8 | 148.9 | 15.6 | 31.7 |
| 35100 | 109.3 | 36.1 | 145.4 | -2.7 | 18.2 |
| 36000 | 111.8 | 35.6 | 147.4 | 1.4  | 18.9 |
| 36900 | 108.5 | 37.1 | 145.6 | 8.1  | 27.2 |
| 37800 | 109.5 | 36.9 | 146.4 | 17.5 | 34.2 |
| 38700 | 114.5 | 34.9 | 149.4 | 10.6 | 28.5 |
| 39600 | 113.6 | 36.9 | 150.5 | 11.5 | 31.0 |
| 40500 | 111.7 | 38.6 | 150.3 | 12.3 | 30.8 |
| 41400 | 109.5 | 35.5 | 145.0 | 3.9  | 22.9 |
| 42300 | 114.3 | 38.2 | 152.5 | 11.5 | 27.8 |
| 43200 | 113.2 | 36.1 | 149.3 | 5.6  | 22.5 |
| 44100 | 109.2 | 36.4 | 145.6 | 12.5 | 32.0 |
| 45000 | 111.5 | 34.9 | 146.4 | 16.2 | 37.8 |
| 45900 | 113.0 | 35.4 | 148.4 | 11.5 | 35.2 |
| 46800 | 110.4 | 33.7 | 144.1 | 12.1 | 30.7 |
| 47700 | 112.2 | 33.3 | 145.5 | 7.1  | 25.7 |
| 48600 | 115.1 | 34.7 | 149.8 | 9.0  | 27.5 |
| 49500 | 115.1 | 34.1 | 149.2 | 8.9  | 28.8 |
| 50400 | 112.6 | 35.1 | 147.7 | 13.9 | 33.2 |

Table 10 Processed data – Bromo 50 °C

| Processed data - concentration normalization |                       |                                    |                                   |                                 |                            |
|----------------------------------------------|-----------------------|------------------------------------|-----------------------------------|---------------------------------|----------------------------|
| Time/s                                       | 50 °C                 |                                    |                                   |                                 |                            |
|                                              | product (8.92 ppm)/mM | intermediate product (7.00 ppm)/mM | product + intermediate product/mM | starting material (2.25 ppm)/mM | side product (1.99 ppm)/mM |
| 60                                           | 2.4                   | 1.7                                | 4.1                               | 46.6                            | 2.2                        |
| 960                                          | 19.2                  | 8.6                                | 27.8                              | 10.2                            | 4.0                        |
| 1860                                         | 24.4                  | 9.2                                | 33.6                              | 3.2                             | 5.4                        |
| 2760                                         | 25.1                  | 10.4                               | 35.6                              | 2.6                             | 8.1                        |
| 3660                                         |                       |                                    |                                   |                                 |                            |
| 4560                                         | 25.5                  | 10.8                               | 36.3                              | 0.0                             | 5.5                        |
| 0                                            | 0.0                   | 0.0                                | 0.0                               | 53.0                            | 0.0                        |

\* Correction: + 1 minutes, slope + 0.5

## KIN-80-Bromo

Derivative: X= Bromo

Concentration: 53 mM

Base: 5 equiv. Temperature: 80 °C

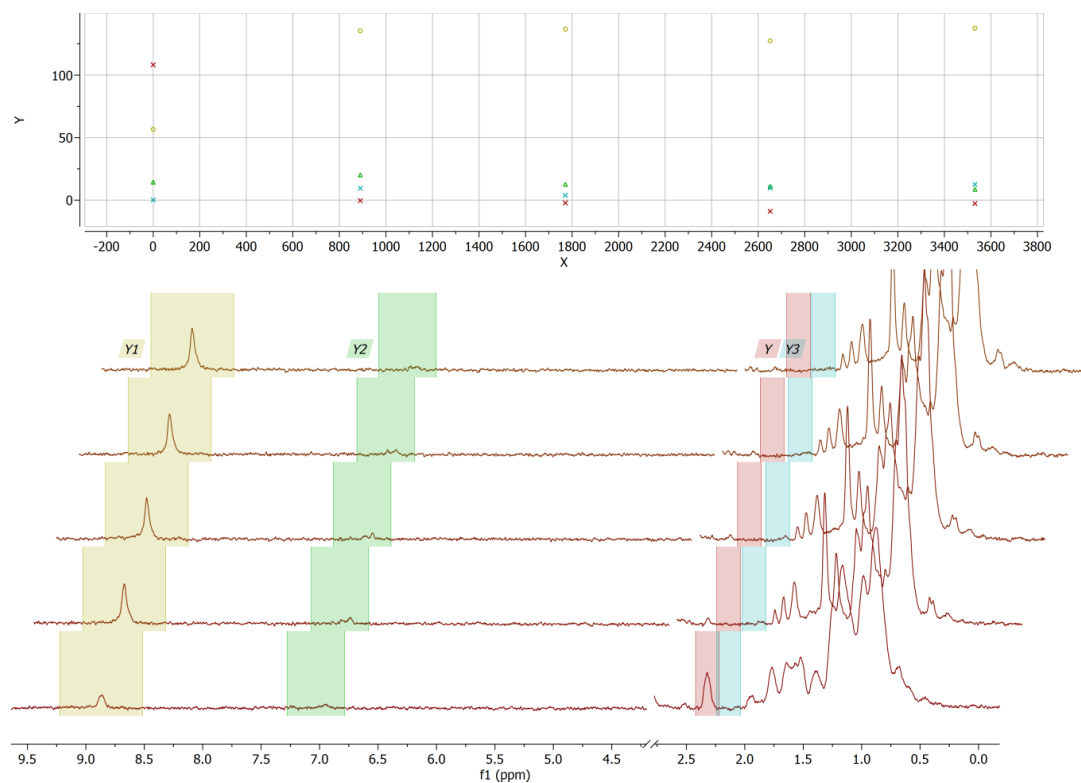

Fig. 12 Mestrenova - Chloro 80 °C

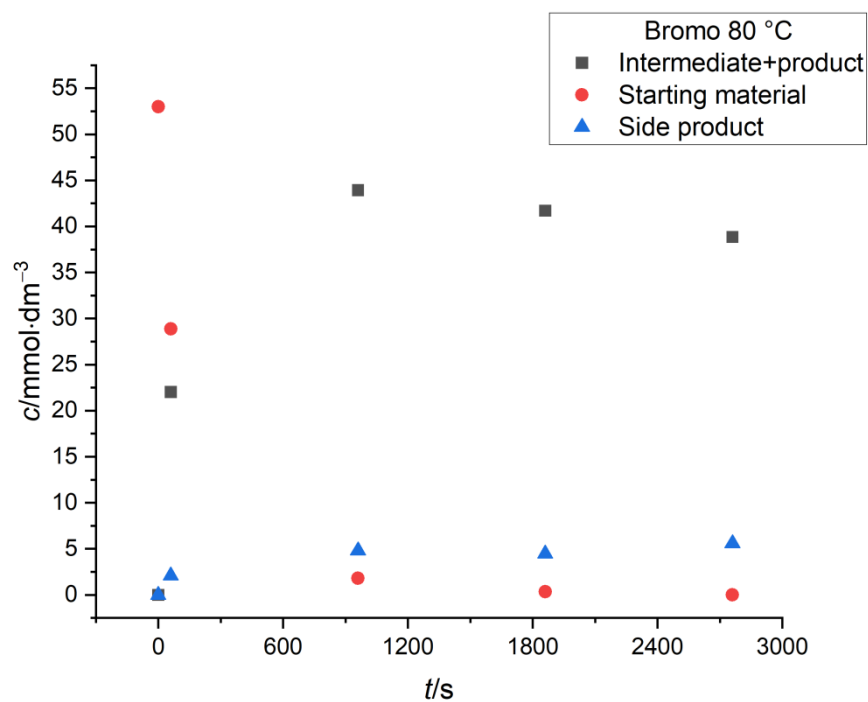

Fig. 13 Processed graph – Bromo 80 °C

Table 11 Raw data – integral values – Bromo 80 °C

| Time/s | 80 °C              |                                 |                                |                              |                         |
|--------|--------------------|---------------------------------|--------------------------------|------------------------------|-------------------------|
|        | product (8.92 ppm) | intermediate product (7.00 ppm) | product + intermediate product | starting material (2.25 ppm) | side product (1.99 ppm) |
| 0      | 59.1               | 15.6                            | 74.6                           | 108.3                        | 1.9                     |
| 900    | 142.5              | 19.1                            | 161.6                          | 0.8                          | 12.7                    |
| 1800   | 141.1              | 11.7                            | 152.8                          | -5.0                         | 11.3                    |
| 2700   | 132.0              | 9.5                             | 141.4                          | -6.4                         | 15.9                    |
| 3600   | 141.0              | 6.8                             | 147.8                          | -1.3                         | 16.6                    |

Table 12 Processed data – Bromo 80 °C

| Processed data - concentration normalization |                       |                                    |                                   |                                 |                            |
|----------------------------------------------|-----------------------|------------------------------------|-----------------------------------|---------------------------------|----------------------------|
| Time/s                                       | 80 °C                 |                                    |                                   |                                 |                            |
|                                              | product (8.92 ppm)/mM | intermediate product (7.00 ppm)/mM | product + intermediate product/mM | starting material (2.25 ppm)/mM | side product (1.99 ppm)/mM |
| 60                                           | 16.5                  | 5.5                                | 22.0                              | 28.9                            | 2.1                        |
| 960                                          | 37.5                  | 6.4                                | 43.9                              | 1.8                             | 4.8                        |
| 1860                                         | 37.1                  | 4.6                                | 41.7                              | 0.3                             | 4.5                        |
| 2760                                         | 34.9                  | 4.0                                | 38.8                              | 0.0                             | 5.6                        |
| 0                                            | 0.0                   | 0.0                                | 0.0                               | 53.0                            | 0.0                        |

\* Correction: + 1 minute, slope + 6.4

## KIN-40-Chloro

Derivative: X= Chloro

Concentration: 53 mM

Base: 5 equiv. Temperature: 40 °C

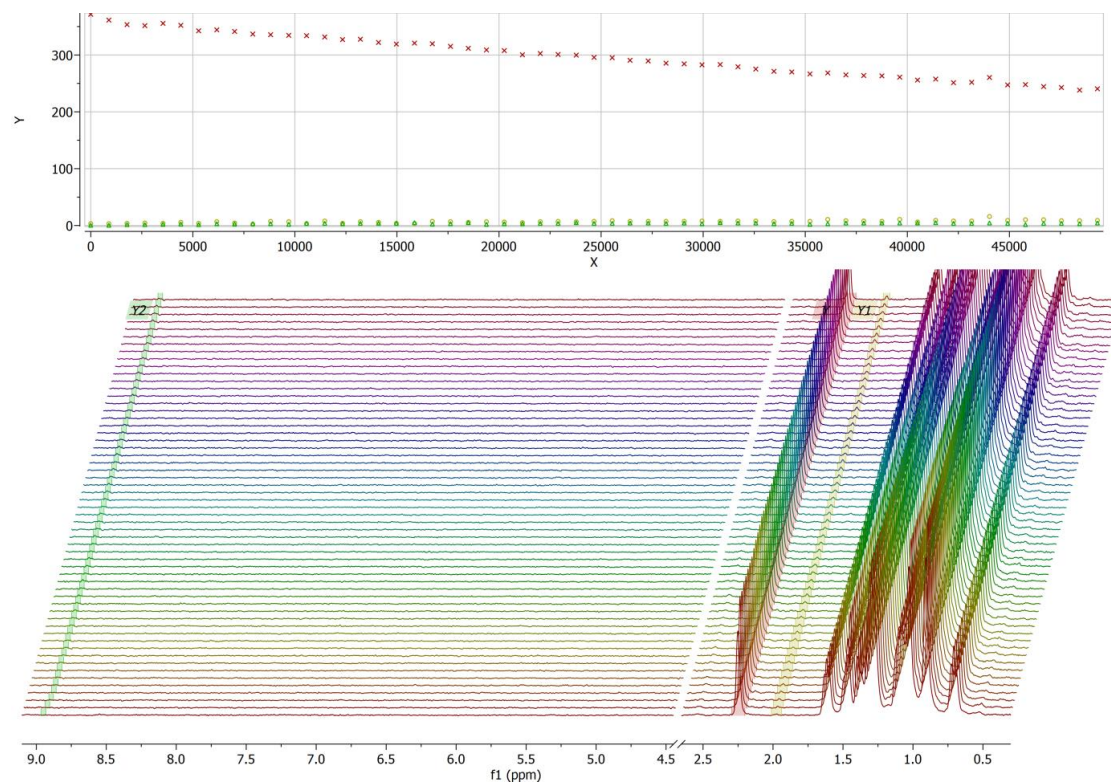

Fig. 14 Mestrenova - Chloro 40 °C

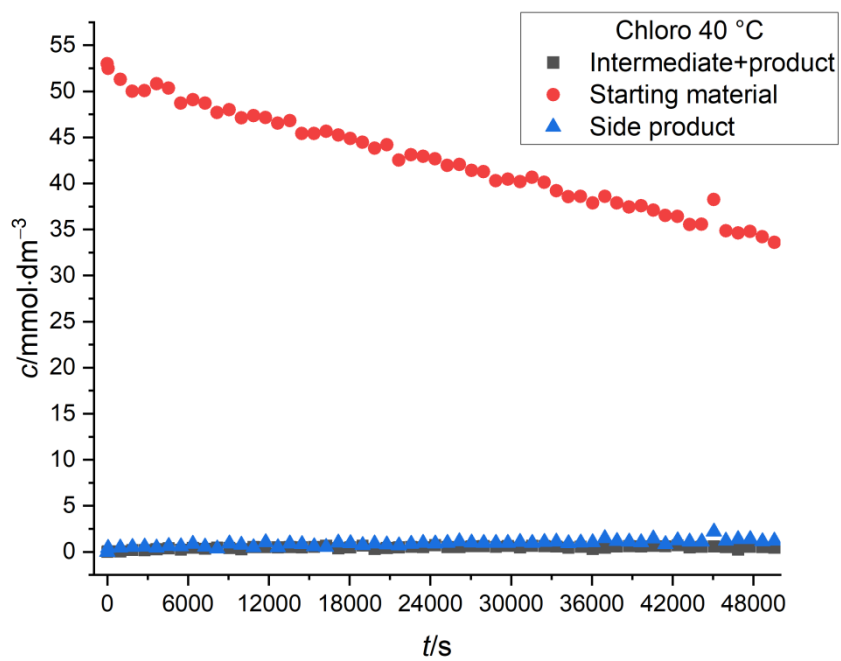

Fig. 15 Processed graph – Chloro 40 °C

Table 13 Raw data – integral values – Chloro 40 °C

| Time/s | 40 °C              |                                 |                                |                              |                         |
|--------|--------------------|---------------------------------|--------------------------------|------------------------------|-------------------------|
|        | product (8.92 ppm) | intermediate product (7.00 ppm) | product + intermediate product | starting material (2.25 ppm) | side product (1.99 ppm) |
| 0      | 0.5                | 0.0                             | 0.5                            | 379.7                        | 3.2                     |
| 900    | 0.4                | 0.0                             | 0.4                            | 371.0                        | 3.2                     |
| 1800   | 1.4                | 0.0                             | 1.4                            | 361.6                        | 3.8                     |
| 2700   | 1.4                | 0.0                             | 1.4                            | 362.2                        | 4.0                     |
| 3600   | 2.1                | 0.0                             | 2.1                            | 367.6                        | 3.4                     |
| 4500   | 2.9                | 0.0                             | 2.9                            | 364.2                        | 4.5                     |
| 5400   | 1.7                | 0.0                             | 1.7                            | 352.3                        | 4.3                     |
| 6300   | 3.1                | 0.0                             | 3.1                            | 355.2                        | 6.2                     |
| 7200   | 2.5                | 0.0                             | 2.5                            | 352.3                        | 4.1                     |
| 8100   | 3.4                | 0.0                             | 3.4                            | 345.1                        | 2.7                     |
| 9000   | 3.0                | 0.0                             | 3.0                            | 347.1                        | 6.6                     |
| 9900   | 2.1                | 0.0                             | 2.1                            | 340.7                        | 5.6                     |
| 10800  | 3.8                | 0.0                             | 3.8                            | 342.6                        | 3.6                     |
| 11700  | 3.6                | 0.0                             | 3.6                            | 341.0                        | 7.6                     |
| 12600  | 3.5                | 0.0                             | 3.5                            | 336.6                        | 3.5                     |
| 13500  | 3.7                | 0.0                             | 3.7                            | 338.6                        | 6.5                     |
| 14400  | 3.6                | 0.0                             | 3.6                            | 328.5                        | 5.9                     |
| 15300  | 4.0                | 0.0                             | 4.0                            | 328.5                        | 4.3                     |
| 16200  | 4.7                | 0.0                             | 4.7                            | 330.2                        | 3.7                     |
| 17100  | 2.8                | 0.0                             | 2.8                            | 327.3                        | 7.3                     |
| 18000  | 3.5                | 0.0                             | 3.5                            | 324.6                        | 6.8                     |
| 18900  | 4.9                | 0.0                             | 4.9                            | 321.6                        | 5.3                     |
| 19800  | 2.2                | 0.0                             | 2.2                            | 317.1                        | 6.5                     |
| 20700  | 3.1                | 0.0                             | 3.1                            | 319.7                        | 5.8                     |
| 21600  | 3.5                | 0.0                             | 3.5                            | 307.6                        | 5.1                     |
| 22500  | 3.9                | 0.0                             | 3.9                            | 311.9                        | 6.4                     |
| 23400  | 3.6                | 0.0                             | 3.6                            | 310.6                        | 7.1                     |
| 24300  | 5.3                | 0.0                             | 5.3                            | 308.7                        | 6.5                     |
| 25200  | 3.8                | 0.0                             | 3.8                            | 303.6                        | 7.0                     |
| 26100  | 3.7                | 0.0                             | 3.7                            | 304.2                        | 8.2                     |
| 27000  | 4.4                | 0.0                             | 4.4                            | 299.5                        | 7.2                     |
| 27900  | 4.5                | 0.0                             | 4.5                            | 298.5                        | 7.2                     |
| 28800  | 3.9                | 0.0                             | 3.9                            | 291.4                        | 7.1                     |
| 29700  | 4.6                | 0.0                             | 4.6                            | 292.8                        | 7.1                     |
| 30600  | 3.5                | 0.0                             | 3.5                            | 290.7                        | 7.9                     |
| 31500  | 4.7                | 0.0                             | 4.7                            | 294.0                        | 7.1                     |

|       |     |     |     |       |      |
|-------|-----|-----|-----|-------|------|
| 32400 | 4.5 | 0.0 | 4.5 | 290.2 | 7.8  |
| 33300 | 4.2 | 0.0 | 4.2 | 283.5 | 8.0  |
| 34200 | 3.2 | 0.0 | 3.2 | 278.8 | 6.8  |
| 35100 | 4.0 | 0.0 | 4.0 | 279.1 | 7.2  |
| 36000 | 2.1 | 0.0 | 2.1 | 274.1 | 7.4  |
| 36900 | 3.2 | 0.0 | 3.2 | 279.2 | 10.6 |
| 37800 | 4.1 | 0.0 | 4.1 | 273.9 | 8.5  |
| 38700 | 4.5 | 0.0 | 4.5 | 270.9 | 8.0  |
| 39600 | 4.2 | 0.0 | 4.2 | 271.9 | 7.4  |
| 40500 | 4.6 | 0.0 | 4.6 | 268.3 | 10.5 |
| 41400 | 4.3 | 0.0 | 4.3 | 264.1 | 6.0  |
| 42300 | 5.1 | 0.0 | 5.1 | 263.4 | 8.9  |
| 43200 | 3.6 | 0.0 | 3.6 | 257.2 | 8.0  |
| 44100 | 4.1 | 0.0 | 4.1 | 257.2 | 8.0  |
| 45000 | 4.3 | 0.0 | 4.3 | 276.8 | 16.0 |
| 45900 | 3.8 | 0.0 | 3.8 | 252.2 | 8.7  |
| 46800 | 1.8 | 0.0 | 1.8 | 250.4 | 10.0 |
| 47700 | 4.1 | 0.0 | 4.1 | 251.6 | 10.0 |
| 48600 | 3.8 | 0.0 | 3.8 | 247.5 | 8.3  |
| 49500 | 3.1 | 0.0 | 3.1 | 243.0 | 8.7  |
| 50400 | 4.1 | 0.0 | 4.1 | 246.7 | 9.0  |

Table 14 Processed data – Chloro 40 °C

| Time/s | Processed data - concentration normalization |                                    |                                   |                                 |                            |
|--------|----------------------------------------------|------------------------------------|-----------------------------------|---------------------------------|----------------------------|
|        | 40 °C                                        |                                    |                                   |                                 |                            |
|        | product (8.92 ppm)/mM                        | intermediate product (7.00 ppm)/mM | product + intermediate product/mM | starting material (2.25 ppm)/mM | side product (1.99 ppm)/mM |
| 60     | 0.1                                          | 0.0                                | 0.1                               | 52.5                            | 0.4                        |
| 960    | 0.0                                          | 0.0                                | 0.0                               | 51.3                            | 0.4                        |
| 1860   | 0.2                                          | 0.0                                | 0.2                               | 50.0                            | 0.5                        |
| 2760   | 0.2                                          | 0.0                                | 0.2                               | 50.1                            | 0.6                        |
| 3660   | 0.3                                          | 0.0                                | 0.3                               | 50.8                            | 0.5                        |
| 4560   | 0.4                                          | 0.0                                | 0.4                               | 50.4                            | 0.6                        |
| 5460   | 0.2                                          | 0.0                                | 0.2                               | 48.7                            | 0.6                        |
| 6360   | 0.4                                          | 0.0                                | 0.4                               | 49.1                            | 0.9                        |
| 7260   | 0.3                                          | 0.0                                | 0.3                               | 48.7                            | 0.6                        |
| 8160   | 0.5                                          | 0.0                                | 0.5                               | 47.7                            | 0.4                        |
| 9060   | 0.4                                          | 0.0                                | 0.4                               | 48.0                            | 0.9                        |
| 9960   | 0.3                                          | 0.0                                | 0.3                               | 47.1                            | 0.8                        |
| 10860  | 0.5                                          | 0.0                                | 0.5                               | 47.4                            | 0.5                        |
| 11760  | 0.5                                          | 0.0                                | 0.5                               | 47.1                            | 1.1                        |
| 12660  | 0.5                                          | 0.0                                | 0.5                               | 46.5                            | 0.5                        |
| 13560  | 0.5                                          | 0.0                                | 0.5                               | 46.8                            | 0.9                        |
| 14460  | 0.5                                          | 0.0                                | 0.5                               | 45.4                            | 0.8                        |
| 15360  | 0.5                                          | 0.0                                | 0.5                               | 45.4                            | 0.6                        |
| 16260  | 0.7                                          | 0.0                                | 0.7                               | 45.6                            | 0.5                        |
| 17160  | 0.4                                          | 0.0                                | 0.4                               | 45.2                            | 1.0                        |
| 18060  | 0.5                                          | 0.0                                | 0.5                               | 44.9                            | 0.9                        |
| 18960  | 0.7                                          | 0.0                                | 0.7                               | 44.5                            | 0.7                        |
| 19860  | 0.3                                          | 0.0                                | 0.3                               | 43.8                            | 0.9                        |
| 20760  | 0.4                                          | 0.0                                | 0.4                               | 44.2                            | 0.8                        |
| 21660  | 0.5                                          | 0.0                                | 0.5                               | 42.5                            | 0.7                        |
| 22560  | 0.5                                          | 0.0                                | 0.5                               | 43.1                            | 0.9                        |
| 23460  | 0.5                                          | 0.0                                | 0.5                               | 42.9                            | 1.0                        |
| 24360  | 0.7                                          | 0.0                                | 0.7                               | 42.7                            | 0.9                        |
| 25260  | 0.5                                          | 0.0                                | 0.5                               | 42.0                            | 1.0                        |
| 26160  | 0.5                                          | 0.0                                | 0.5                               | 42.0                            | 1.1                        |
| 27060  | 0.6                                          | 0.0                                | 0.6                               | 41.4                            | 1.0                        |
| 27960  | 0.6                                          | 0.0                                | 0.6                               | 41.3                            | 1.0                        |
| 28860  | 0.5                                          | 0.0                                | 0.5                               | 40.3                            | 1.0                        |



|       |     |     |     |      |     |
|-------|-----|-----|-----|------|-----|
| 29760 | 0.6 | 0.0 | 0.6 | 40.5 | 1.0 |
| 30660 | 0.5 | 0.0 | 0.5 | 40.2 | 1.1 |
| 31560 | 0.7 | 0.0 | 0.7 | 40.6 | 1.0 |
| 32460 | 0.6 | 0.0 | 0.6 | 40.1 | 1.1 |
| 33360 | 0.6 | 0.0 | 0.6 | 39.2 | 1.1 |
| 34260 | 0.4 | 0.0 | 0.4 | 38.5 | 0.9 |
| 35160 | 0.5 | 0.0 | 0.5 | 38.6 | 1.0 |
| 36060 | 0.3 | 0.0 | 0.3 | 37.9 | 1.0 |
| 36960 | 0.4 | 0.0 | 0.4 | 38.6 | 1.5 |
| 37860 | 0.6 | 0.0 | 0.6 | 37.9 | 1.2 |
| 38760 | 0.6 | 0.0 | 0.6 | 37.4 | 1.1 |
| 39660 | 0.6 | 0.0 | 0.6 | 37.6 | 1.0 |
| 40560 | 0.6 | 0.0 | 0.6 | 37.1 | 1.5 |
| 41460 | 0.6 | 0.0 | 0.6 | 36.5 | 0.8 |
| 42360 | 0.7 | 0.0 | 0.7 | 36.4 | 1.2 |
| 43260 | 0.5 | 0.0 | 0.5 | 35.5 | 1.1 |
| 44160 | 0.6 | 0.0 | 0.6 | 35.6 | 1.1 |
| 45060 | 0.6 | 0.0 | 0.6 | 38.3 | 2.2 |
| 45960 | 0.5 | 0.0 | 0.5 | 34.9 | 1.2 |
| 46860 | 0.2 | 0.0 | 0.2 | 34.6 | 1.4 |
| 47760 | 0.6 | 0.0 | 0.6 | 34.8 | 1.4 |
| 48660 | 0.5 | 0.0 | 0.5 | 34.2 | 1.1 |
| 49560 | 0.4 | 0.0 | 0.4 | 33.6 | 1.2 |
| 0     | 0.0 | 0.0 | 0.0 | 53.0 | 0.0 |

\* Correction: + 1 minute, slope + 0.0

## KIN-60-Chloro

Derivative: X= Chloro

Concentration: 53 mM

Base: 5 equiv. Temperature: 60 °C

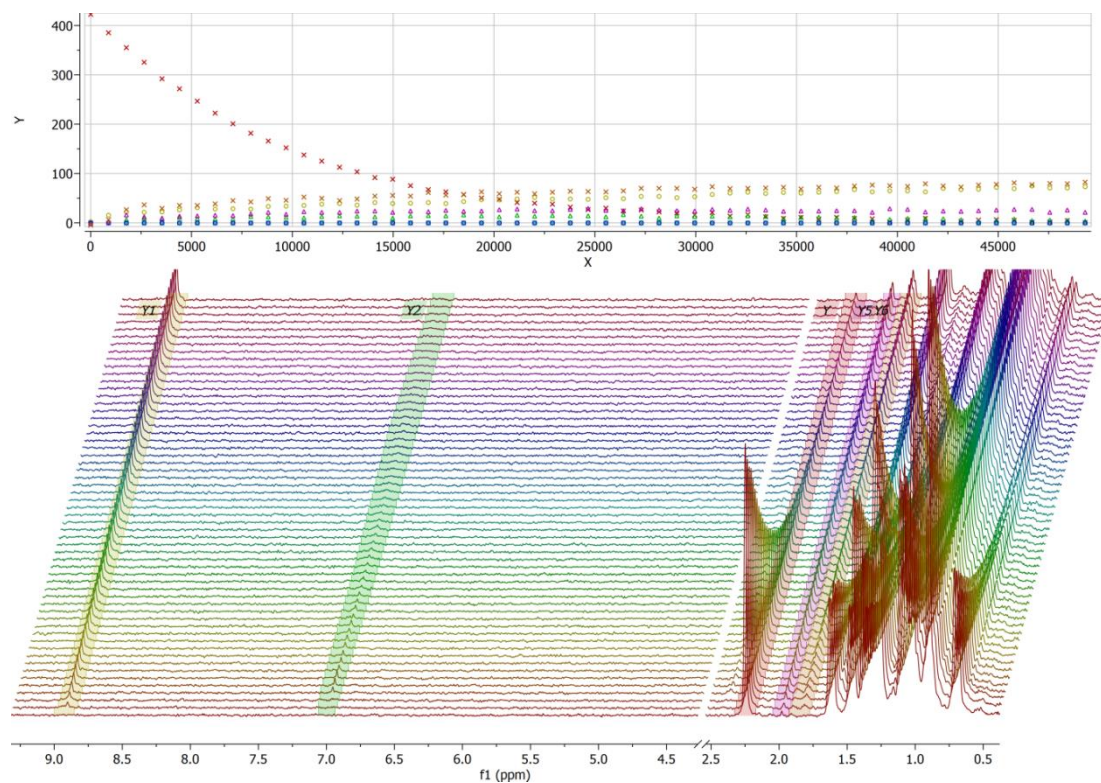

Fig. 16 Mestrenova - Chloro 60 °C

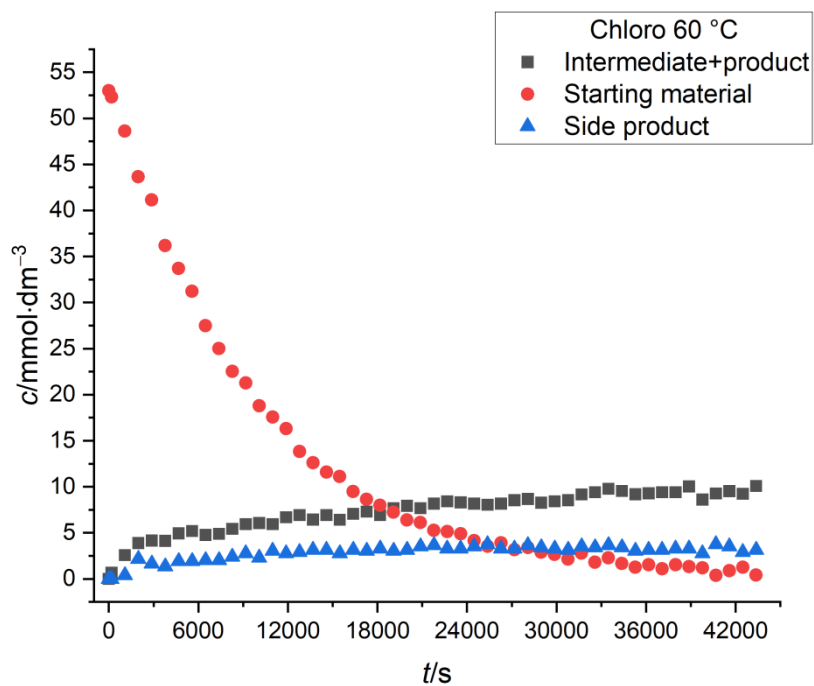

Fig. 17 Processed graph – Chloro 60 °C

Table 15 Raw data – integral values – Chloro 60 °C

| Time/s | 60 °C              |                                 |                                |                              |                         |
|--------|--------------------|---------------------------------|--------------------------------|------------------------------|-------------------------|
|        | product (8.92 ppm) | intermediate product (7.00 ppm) | product + intermediate product | starting material (2.25 ppm) | side product (1.99 ppm) |
| 0      | 2.2                | 0.4                             | 2.6                            | 420.0                        | -1.4                    |
| 900    | 16.0               | 1.9                             | 17.9                           | 390.0                        | 1.8                     |
| 1800   | 22.0               | 6.5                             | 28.5                           | 350.0                        | 16.0                    |
| 2700   | 21.0               | 9.7                             | 30.7                           | 330.0                        | 12.0                    |
| 3600   | 22.0               | 8.4                             | 30.4                           | 290.0                        | 9.4                     |
| 4500   | 26.0               | 11.0                            | 37.0                           | 270.0                        | 14.0                    |
| 5400   | 31.0               | 8.0                             | 39.0                           | 250.0                        | 14.0                    |
| 6300   | 28.0               | 7.6                             | 35.6                           | 220.0                        | 15.0                    |
| 7200   | 29.0               | 7.6                             | 36.6                           | 200.0                        | 15.0                    |
| 8100   | 28.0               | 13.0                            | 41.0                           | 180.0                        | 18.0                    |
| 9000   | 33.0               | 12.0                            | 45.0                           | 170.0                        | 21.0                    |
| 9900   | 34.0               | 12.0                            | 46.0                           | 150.0                        | 17.0                    |
| 10800  | 35.0               | 10.0                            | 45.0                           | 140.0                        | 23.0                    |
| 11700  | 38.0               | 13.0                            | 51.0                           | 130.0                        | 21.0                    |
| 12600  | 39.0               | 14.0                            | 53.0                           | 110.0                        | 22.0                    |
| 13500  | 36.0               | 13.0                            | 49.0                           | 100.0                        | 24.0                    |
| 14400  | 41.0               | 12.0                            | 53.0                           | 92.0                         | 24.0                    |
| 15300  | 39.0               | 9.9                             | 48.9                           | 88.0                         | 21.0                    |
| 16200  | 40.0               | 14.0                            | 54.0                           | 75.0                         | 24.0                    |
| 17100  | 41.0               | 15.0                            | 56.0                           | 68.0                         | 23.0                    |
| 18000  | 39.0               | 14.0                            | 53.0                           | 63.0                         | 25.0                    |
| 18900  | 43.0               | 16.0                            | 59.0                           | 57.0                         | 23.0                    |
| 19800  | 47.0               | 14.0                            | 61.0                           | 50.0                         | 24.0                    |
| 20700  | 47.0               | 12.0                            | 59.0                           | 48.0                         | 27.0                    |
| 21600  | 48.0               | 15.0                            | 63.0                           | 41.0                         | 28.0                    |
| 22500  | 52.0               | 13.0                            | 65.0                           | 40.0                         | 25.0                    |
| 23400  | 49.0               | 15.0                            | 64.0                           | 38.0                         | 25.0                    |
| 24300  | 49.0               | 14.0                            | 63.0                           | 32.0                         | 27.0                    |
| 25200  | 48.0               | 14.0                            | 62.0                           | 27.0                         | 29.0                    |
| 26100  | 51.0               | 12.0                            | 63.0                           | 30.0                         | 25.0                    |
| 27000  | 49.0               | 17.0                            | 66.0                           | 24.0                         | 25.0                    |
| 27900  | 53.0               | 14.0                            | 67.0                           | 26.0                         | 28.0                    |
| 28800  | 54.0               | 9.8                             | 63.8                           | 22.0                         | 26.0                    |
| 29700  | 51.0               | 14.0                            | 65.0                           | 20.0                         | 25.0                    |
| 30600  | 53.0               | 13.0                            | 66.0                           | 16.0                         | 24.0                    |
| 31500  | 58.0               | 13.0                            | 71.0                           | 21.0                         | 27.0                    |

|       |      |      |      |      |      |
|-------|------|------|------|------|------|
| 32400 | 60.0 | 13.0 | 73.0 | 13.0 | 26.0 |
| 33300 | 62.0 | 14.0 | 76.0 | 17.0 | 28.0 |
| 34200 | 60.0 | 14.0 | 74.0 | 12.0 | 26.0 |
| 35100 | 62.0 | 9.2  | 71.2 | 8.7  | 23.0 |
| 36000 | 60.0 | 12.0 | 72.0 | 11.0 | 24.0 |
| 36900 | 62.0 | 11.0 | 73.0 | 7.3  | 24.0 |
| 37800 | 63.0 | 10.0 | 73.0 | 11.0 | 25.0 |
| 38700 | 67.0 | 11.0 | 78.0 | 9.2  | 25.0 |
| 39600 | 63.0 | 3.5  | 66.5 | 8.3  | 21.0 |
| 40500 | 65.0 | 6.9  | 71.9 | 1.6  | 29.0 |
| 41400 | 65.0 | 8.9  | 73.9 | 5.8  | 27.0 |
| 42300 | 63.0 | 8.6  | 71.6 | 8.7  | 22.0 |
| 43200 | 70.0 | 8.4  | 78.4 | 1.8  | 24.0 |
| 44100 | 67.0 | 6.2  | 73.2 | 3.2  | 24.0 |
| 45000 | 68.0 | 3.3  | 71.3 | 5.8  | 25.0 |
| 45900 | 72.0 | 5.0  | 77.0 | 6.1  | 26.0 |
| 46800 | 69.0 | 7.6  | 76.6 | 5.1  | 27.0 |
| 47700 | 75.0 | 4.6  | 79.6 | 1.3  | 27.0 |
| 48600 | 71.0 | 5.3  | 76.3 | 1.5  | 22.0 |
| 49500 | 70.0 | 5.2  | 75.2 | 4.4  | 26.0 |
| 50400 | 73.0 | 3.6  | 76.6 | 0.3  | 21.0 |

Table 16 Processed data – Chloro 60 °C

| Time/s | Processed data - concentration normalization |                                    |                                   |                                 |                            |
|--------|----------------------------------------------|------------------------------------|-----------------------------------|---------------------------------|----------------------------|
|        | 60 °C                                        |                                    |                                   |                                 |                            |
|        | product (8.92 ppm)/mM                        | intermediate product (7.00 ppm)/mM | product + intermediate product/mM | starting material (2.25 ppm)/mM | side product (1.99 ppm)/mM |
| 180    | 0.4                                          | 0.2                                | 0.7                               | 52.3                            | 0.0                        |
| 1080   | 2.2                                          | 0.4                                | 2.6                               | 48.6                            | 0.4                        |
| 1980   | 2.9                                          | 1.0                                | 3.9                               | 43.6                            | 2.2                        |
| 2880   | 2.8                                          | 1.4                                | 4.2                               | 41.2                            | 1.7                        |
| 3780   | 2.9                                          | 1.2                                | 4.1                               | 36.2                            | 1.3                        |
| 4680   | 3.4                                          | 1.5                                | 4.9                               | 33.7                            | 1.9                        |
| 5580   | 4.0                                          | 1.2                                | 5.2                               | 31.2                            | 1.9                        |
| 6480   | 3.7                                          | 1.1                                | 4.8                               | 27.5                            | 2.0                        |
| 7380   | 3.8                                          | 1.1                                | 4.9                               | 25.0                            | 2.0                        |
| 8280   | 3.7                                          | 1.8                                | 5.4                               | 22.5                            | 2.4                        |
| 9180   | 4.3                                          | 1.7                                | 5.9                               | 21.3                            | 2.8                        |
| 10080  | 4.4                                          | 1.7                                | 6.1                               | 18.8                            | 2.3                        |
| 10980  | 4.5                                          | 1.4                                | 5.9                               | 17.6                            | 3.0                        |
| 11880  | 4.9                                          | 1.8                                | 6.7                               | 16.3                            | 2.8                        |
| 12780  | 5.0                                          | 1.9                                | 6.9                               | 13.8                            | 2.9                        |
| 13680  | 4.6                                          | 1.8                                | 6.4                               | 12.6                            | 3.2                        |
| 14580  | 5.3                                          | 1.7                                | 6.9                               | 11.6                            | 3.2                        |
| 15480  | 5.0                                          | 1.4                                | 6.4                               | 11.1                            | 2.8                        |
| 16380  | 5.1                                          | 1.9                                | 7.1                               | 9.5                             | 3.2                        |
| 17280  | 5.3                                          | 2.0                                | 7.3                               | 8.6                             | 3.0                        |
| 18180  | 5.0                                          | 1.9                                | 6.9                               | 8.0                             | 3.3                        |
| 19080  | 5.5                                          | 2.2                                | 7.7                               | 7.3                             | 3.0                        |
| 19980  | 6.0                                          | 1.9                                | 7.9                               | 6.4                             | 3.2                        |
| 20880  | 6.0                                          | 1.7                                | 7.7                               | 6.1                             | 3.5                        |
| 21780  | 6.1                                          | 2.0                                | 8.2                               | 5.3                             | 3.7                        |
| 22680  | 6.6                                          | 1.8                                | 8.4                               | 5.1                             | 3.3                        |
| 23580  | 6.3                                          | 2.0                                | 8.3                               | 4.9                             | 3.3                        |
| 24480  | 6.3                                          | 1.9                                | 8.2                               | 4.1                             | 3.5                        |
| 25380  | 6.1                                          | 1.9                                | 8.0                               | 3.5                             | 3.8                        |
| 26280  | 6.5                                          | 1.7                                | 8.2                               | 3.9                             | 3.3                        |
| 27180  | 6.3                                          | 2.3                                | 8.5                               | 3.2                             | 3.3                        |
| 28080  | 6.8                                          | 1.9                                | 8.7                               | 3.4                             | 3.7                        |
| 28980  | 6.9                                          | 1.4                                | 8.3                               | 2.9                             | 3.4                        |

|       |     |     |      |      |     |
|-------|-----|-----|------|------|-----|
| 29880 | 6.5 | 1.9 | 8.4  | 2.7  | 3.3 |
| 30780 | 6.8 | 1.8 | 8.5  | 2.2  | 3.2 |
| 31680 | 7.4 | 1.8 | 9.2  | 2.8  | 3.5 |
| 32580 | 7.6 | 1.8 | 9.4  | 1.8  | 3.4 |
| 33480 | 7.9 | 1.9 | 9.8  | 2.3  | 3.7 |
| 34380 | 7.6 | 1.9 | 9.5  | 1.7  | 3.4 |
| 35280 | 7.9 | 1.3 | 9.2  | 1.3  | 3.0 |
| 36180 | 7.6 | 1.7 | 9.3  | 1.5  | 3.2 |
| 37080 | 7.9 | 1.5 | 9.4  | 1.1  | 3.2 |
| 37980 | 8.0 | 1.4 | 9.4  | 1.5  | 3.3 |
| 38880 | 8.5 | 1.5 | 10.0 | 1.3  | 3.3 |
| 39780 | 8.0 | 0.6 | 8.6  | 1.2  | 2.8 |
| 40680 | 8.2 | 1.0 | 9.3  | 0.4  | 3.8 |
| 41580 | 8.2 | 1.3 | 9.5  | 0.9  | 3.5 |
| 42480 | 8.0 | 1.2 | 9.2  | 1.3  | 2.9 |
| 43380 | 8.9 | 1.2 | 10.1 | 0.4  | 3.2 |
| 0     | 0.0 | 0.0 | 0.0  | 53.0 | 0.0 |

\* Correction: + 3 minutes, slope + 1.4

## KIN-70-Chloro

Derivative: X= Chloro

Concentration: 53 mM

Base: 5 equiv. Temperature: 70 °C

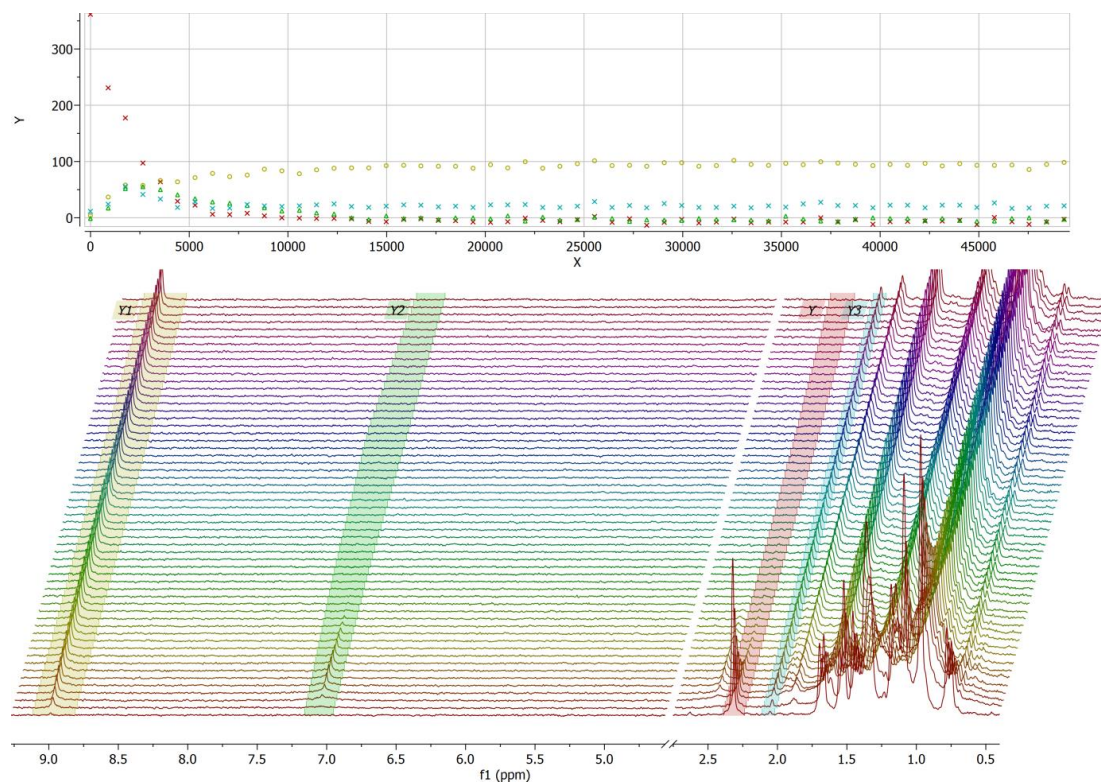

Fig. 18 Mestrenova - Chloro 70 °C

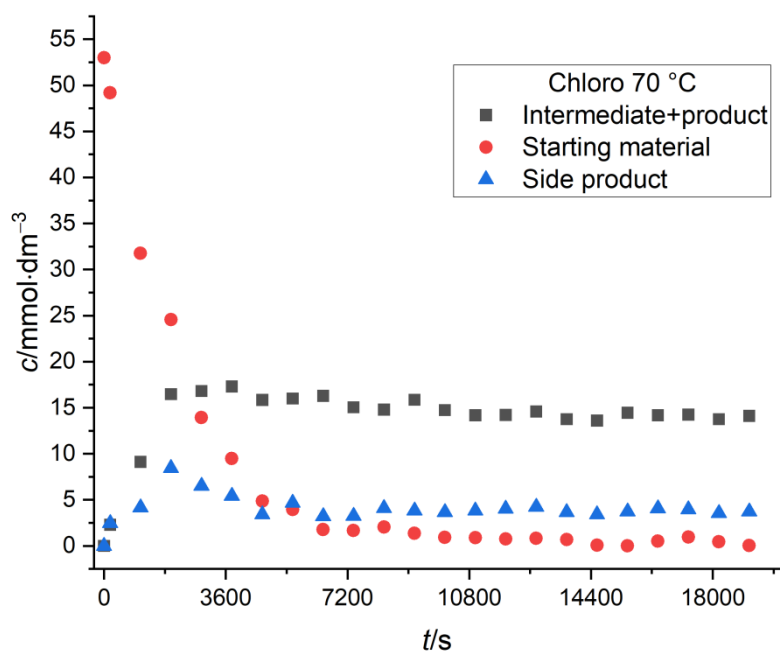

Fig. 19 Processed graph – Chloro 70 °C

Table 17 Raw data – integral values – Chloro 70 °C

| Time/s | 70 °C              |                                 |                                |                              |                         |
|--------|--------------------|---------------------------------|--------------------------------|------------------------------|-------------------------|
|        | product (8.92 ppm) | intermediate product (7.00 ppm) | product + intermediate product | starting material (2.25 ppm) | side product (1.99 ppm) |
| 0      | 3.7                | -0.9                            | 2.8                            | 361.7                        | 11.4                    |
| 900    | 36.9               | 17.1                            | 54.0                           | 231.0                        | 23.9                    |
| 1800   | 58.3               | 50.9                            | 109.2                          | 177.1                        | 56.1                    |
| 2700   | 57.8               | 53.9                            | 111.7                          | 97.3                         | 41.6                    |
| 3600   | 66.2               | 49.2                            | 115.3                          | 63.8                         | 33.5                    |
| 4500   | 64.0               | 40.4                            | 104.4                          | 29.3                         | 18.4                    |
| 5400   | 71.2               | 34.3                            | 105.5                          | 22.3                         | 28.0                    |
| 6300   | 79.0               | 28.7                            | 107.7                          | 6.1                          | 16.9                    |
| 7200   | 73.1               | 25.4                            | 98.5                           | 5.4                          | 17.1                    |
| 8100   | 76.2               | 20.3                            | 96.5                           | 8.0                          | 23.5                    |
| 9000   | 86.1               | 18.4                            | 104.5                          | 3.1                          | 21.6                    |
| 9900   | 83.3               | 12.8                            | 96.1                           | -0.2                         | 20.1                    |
| 10800  | 78.3               | 13.6                            | 91.9                           | -0.5                         | 21.4                    |
| 11700  | 85.0               | 7.2                             | 92.2                           | -1.5                         | 23.0                    |
| 12600  | 88.0               | 6.9                             | 95.0                           | -1.0                         | 24.5                    |
| 13500  | 88.7               | 0.1                             | 88.8                           | -2.0                         | 20.2                    |
| 14400  | 88.8               | -1.2                            | 87.6                           | -6.7                         | 18.4                    |
| 15300  | 92.6               | 1.4                             | 94.0                           | -7.2                         | 20.8                    |
| 16200  | 93.3               | -1.3                            | 92.0                           | -3.4                         | 23.2                    |
| 17100  | 92.0               | 0.4                             | 92.4                           | -0.1                         | 22.6                    |
| 18000  | 91.4               | -2.7                            | 88.7                           | -4.0                         | 19.5                    |
| 18900  | 91.5               | -0.1                            | 91.4                           | -6.9                         | 20.6                    |
| 19800  | 88.1               | 0.8                             | 88.9                           | -10.5                        | 18.5                    |
| 20700  | 94.2               | -2.1                            | 92.1                           | -8.2                         | 23.3                    |
| 21600  | 88.7               | 1.2                             | 89.8                           | -4.2                         | 22.9                    |
| 22500  | 99.5               | -5.7                            | 93.7                           | -3.2                         | 23.5                    |
| 23400  | 88.3               | 1.1                             | 89.3                           | -7.9                         | 18.6                    |
| 24300  | 91.6               | -3.5                            | 88.1                           | -6.3                         | 18.6                    |
| 25200  | 96.2               | -2.7                            | 93.4                           | -2.7                         | 20.7                    |
| 26100  | 101.5              | -0.5                            | 101.0                          | 4.2                          | 28.9                    |
| 27000  | 92.6               | -0.6                            | 92.1                           | -8.7                         | 18.4                    |
| 27900  | 93.0               | -2.1                            | 90.9                           | -1.5                         | 21.7                    |
| 28800  | 91.7               | -1.9                            | 89.8                           | -10.0                        | 17.6                    |
| 29700  | 97.7               | -1.6                            | 96.2                           | -5.0                         | 25.4                    |
| 30600  | 97.7               | 0.7                             | 98.3                           | -1.6                         | 21.8                    |
| 31500  | 91.5               | -2.3                            | 89.2                           | -8.3                         | 18.6                    |



|       |       |      |       |       |      |
|-------|-------|------|-------|-------|------|
| 32400 | 92.8  | 3.0  | 95.8  | -7.9  | 18.7 |
| 33300 | 102.2 | -0.6 | 101.6 | -3.3  | 20.8 |
| 34200 | 95.2  | -0.6 | 94.6  | -5.6  | 17.7 |
| 35100 | 93.2  | -2.3 | 90.9  | -7.4  | 21.1 |
| 36000 | 97.0  | -1.5 | 95.5  | -5.4  | 19.2 |
| 36900 | 94.7  | -5.2 | 89.5  | -6.7  | 24.6 |
| 37800 | 99.7  | -6.5 | 93.2  | -0.1  | 27.8 |
| 38700 | 97.4  | -5.6 | 91.8  | -6.1  | 21.6 |
| 39600 | 95.0  | -1.6 | 93.4  | -4.4  | 22.0 |
| 40500 | 92.6  | -0.5 | 92.1  | -6.4  | 17.8 |
| 41400 | 95.1  | -2.2 | 92.9  | -8.0  | 22.4 |
| 42300 | 93.4  | -1.7 | 91.7  | -6.6  | 22.2 |
| 43200 | 96.8  | -4.6 | 92.2  | -5.6  | 18.1 |
| 44100 | 92.1  | -0.8 | 91.3  | -4.6  | 22.5 |
| 45000 | 96.1  | -4.8 | 91.3  | -3.1  | 22.2 |
| 45900 | 93.0  | -6.1 | 86.9  | -13.1 | 18.1 |
| 46800 | 93.0  | -5.9 | 87.1  | -0.8  | 26.4 |
| 47700 | 94.0  | -1.0 | 92.9  | -5.2  | 16.7 |
| 48600 | 85.6  | 1.2  | 86.8  | -9.6  | 17.2 |
| 49500 | 95.1  | -5.1 | 90.0  | -7.5  | 20.4 |
| 50400 | 98.4  | -2.1 | 96.3  | -2.7  | 21.3 |

Table 18 Processed data – Chloro 70 °C

| Time/s | Processed data - concentration normalization |                                    |                                   |                                 |                            |
|--------|----------------------------------------------|------------------------------------|-----------------------------------|---------------------------------|----------------------------|
|        | 70 °C                                        |                                    |                                   |                                 |                            |
|        | product (8.92 ppm)/mM                        | intermediate product (7.00 ppm)/mM | product + intermediate product/mM | starting material (2.25 ppm)/mM | side product (1.99 ppm)/mM |
| 180    | 1.5                                          | 0.8                                | 2.3                               | 49.2                            | 2.5                        |
| 1080   | 5.9                                          | 3.2                                | 9.1                               | 31.8                            | 4.2                        |
| 1980   | 8.7                                          | 7.7                                | 16.5                              | 24.6                            | 8.4                        |
| 2880   | 8.7                                          | 8.1                                | 16.8                              | 13.9                            | 6.5                        |
| 3780   | 9.8                                          | 7.5                                | 17.3                              | 9.5                             | 5.4                        |
| 4680   | 9.5                                          | 6.3                                | 15.8                              | 4.9                             | 3.4                        |
| 5580   | 10.5                                         | 5.5                                | 16.0                              | 3.9                             | 4.7                        |
| 6480   | 11.5                                         | 4.8                                | 16.3                              | 1.8                             | 3.2                        |
| 7380   | 10.7                                         | 4.3                                | 15.0                              | 1.7                             | 3.2                        |
| 8280   | 11.1                                         | 3.7                                | 14.8                              | 2.0                             | 4.1                        |
| 9180   | 12.4                                         | 3.4                                | 15.9                              | 1.4                             | 3.8                        |
| 10080  | 12.1                                         | 2.7                                | 14.7                              | 0.9                             | 3.6                        |
| 10980  | 11.4                                         | 2.8                                | 14.2                              | 0.9                             | 3.8                        |
| 11880  | 12.3                                         | 1.9                                | 14.2                              | 0.8                             | 4.0                        |
| 12780  | 12.7                                         | 1.9                                | 14.6                              | 0.8                             | 4.2                        |
| 13680  | 12.8                                         | 1.0                                | 13.8                              | 0.7                             | 3.7                        |
| 14580  | 12.8                                         | 0.8                                | 13.6                              | 0.1                             | 3.4                        |
| 15480  | 13.3                                         | 1.1                                | 14.4                              | 0.0                             | 3.7                        |
| 16380  | 13.4                                         | 0.8                                | 14.2                              | 0.5                             | 4.1                        |
| 17280  | 13.2                                         | 1.0                                | 14.2                              | 0.9                             | 4.0                        |
| 18180  | 13.2                                         | 0.6                                | 13.7                              | 0.4                             | 3.6                        |
| 19080  | 13.2                                         | 0.9                                | 14.1                              | 0.0                             | 3.7                        |
| 0      | 0.0                                          | 0.0                                | 0.0                               | 53.0                            | 0.0                        |

\* Correction: + 3 minutes, slope + 7.2

## KIN-80-Chloro

Derivative: X= Chloro

Concentration: 53 mM

Base: 5 equiv. Temperature: 80 °C

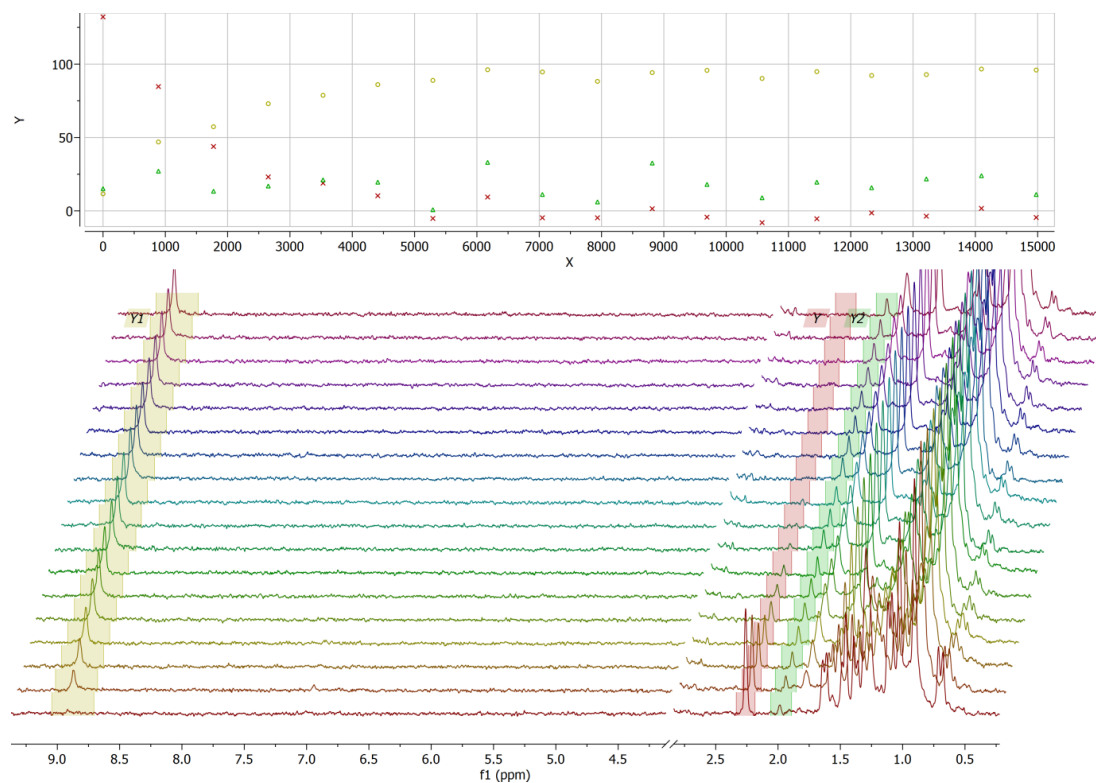

Fig. 20 Mestrenova – Chloro 80 °C

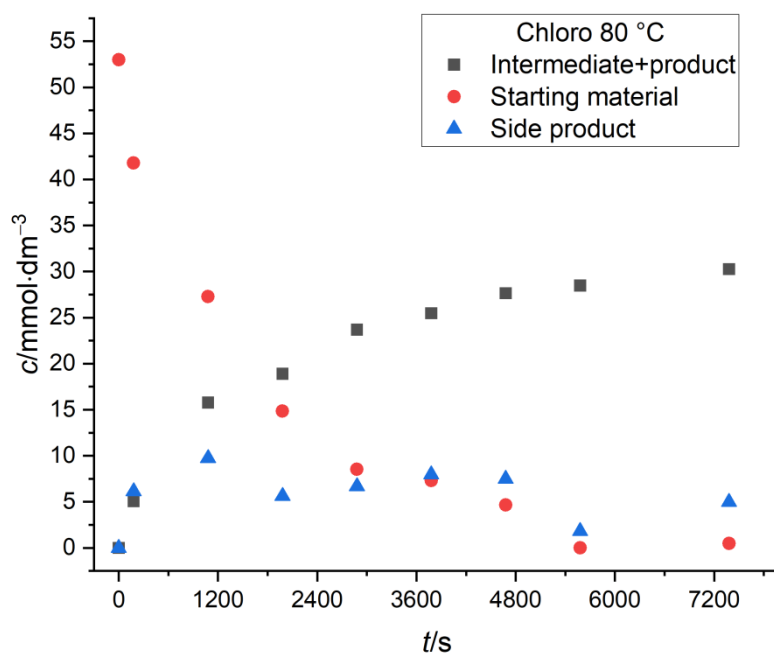

Fig. 21 Processed graph – Chloro 80 °C

Table 19 Raw data – integral values – Chloro 80 °C

| Time/s | 80 °C              |                                 |                                |                              |                         |
|--------|--------------------|---------------------------------|--------------------------------|------------------------------|-------------------------|
|        | product (8.92 ppm) | intermediate product (7.00 ppm) | product + intermediate product | starting material (2.25 ppm) | side product (1.99 ppm) |
| 0      | 11.6               | 0.0                             | 11.6                           | 132.7                        | 15.1                    |
| 900    | 46.9               | 0.0                             | 46.9                           | 84.8                         | 27.0                    |
| 1800   | 57.2               | 0.0                             | 57.2                           | 43.9                         | 13.5                    |
| 2700   | 73.0               | 0.0                             | 73.0                           | 23.0                         | 16.9                    |
| 3600   | 78.8               | 0.0                             | 78.8                           | 18.9                         | 21.2                    |
| 4500   | 86.0               | 0.0                             | 86.0                           | 10.2                         | 19.6                    |
| 5400   | 88.8               | 0.0                             | 88.8                           | -5.1                         | 0.9                     |
| 6300   | 96.3               | 0.0                             | 96.3                           | 9.4                          | 33.0                    |
| 7200   | 94.6               | 0.0                             | 94.6                           | -3.5                         | 11.3                    |
| 8100   | 88.1               | 0.0                             | 88.1                           | -8.2                         | 6.1                     |
| 9000   | 94.1               | 0.0                             | 94.1                           | 2.1                          | 32.7                    |
| 9900   | 95.7               | 0.0                             | 95.7                           | -7.4                         | 17.9                    |
| 10800  | 90.1               | 0.0                             | 90.1                           | -8.7                         | 9.0                     |
| 11700  | 94.7               | 0.0                             | 94.7                           | -3.3                         | 19.6                    |
| 12600  | 92.3               | 0.0                             | 92.3                           | -1.0                         | 15.7                    |
| 13500  | 92.8               | 0.0                             | 92.8                           | -2.0                         | 21.8                    |
| 14400  | 96.7               | 0.0                             | 96.7                           | -0.4                         | 24.0                    |
| 15300  | 96.0               | 0.0                             | 96.0                           | -3.9                         | 11.3                    |

Table 20 Processed data – Chloro 80 °C

| Time/s | Processed data - concentration normalization |                                 |                                |                              |                         |
|--------|----------------------------------------------|---------------------------------|--------------------------------|------------------------------|-------------------------|
|        | 80 °C                                        |                                 |                                |                              |                         |
|        | product (8.92 ppm)                           | intermediate product (7.00 ppm) | product + intermediate product | starting material (2.25 ppm) | side product (1.99 ppm) |
| 180    | 5.1                                          | 0.0                             | 5.1                            | 41.8                         | 6.1                     |
| 1080   | 15.8                                         | 0.0                             | 15.8                           | 27.3                         | 9.7                     |
| 1980   | 18.9                                         | 0.0                             | 18.9                           | 14.9                         | 5.6                     |
| 2880   | 23.7                                         | 0.0                             | 23.7                           | 8.5                          | 6.7                     |
| 3780   | 25.5                                         | 0.0                             | 25.5                           | 7.3                          | 8.0                     |
| 4680   | 27.6                                         | 0.0                             | 27.6                           | 4.7                          | 7.5                     |
| 5580   | 28.5                                         | 0.0                             | 28.5                           | 0.0                          | 1.8                     |
| 6480   |                                              |                                 |                                |                              |                         |
| 7380   | 30.3                                         | 0.0                             | 30.3                           | 0.5                          | 5.0                     |
| 0      | 0.0                                          | 0.0                             | 0.0                            | 53.0                         | 0.0                     |

\* Correction: + 3 minutes, slope + 5.1

## KIN-80-Chloro 2xC

Derivative: X= Chloro

Concentration: 106 mM

Base: 5 equiv. Temperature: 80 °C

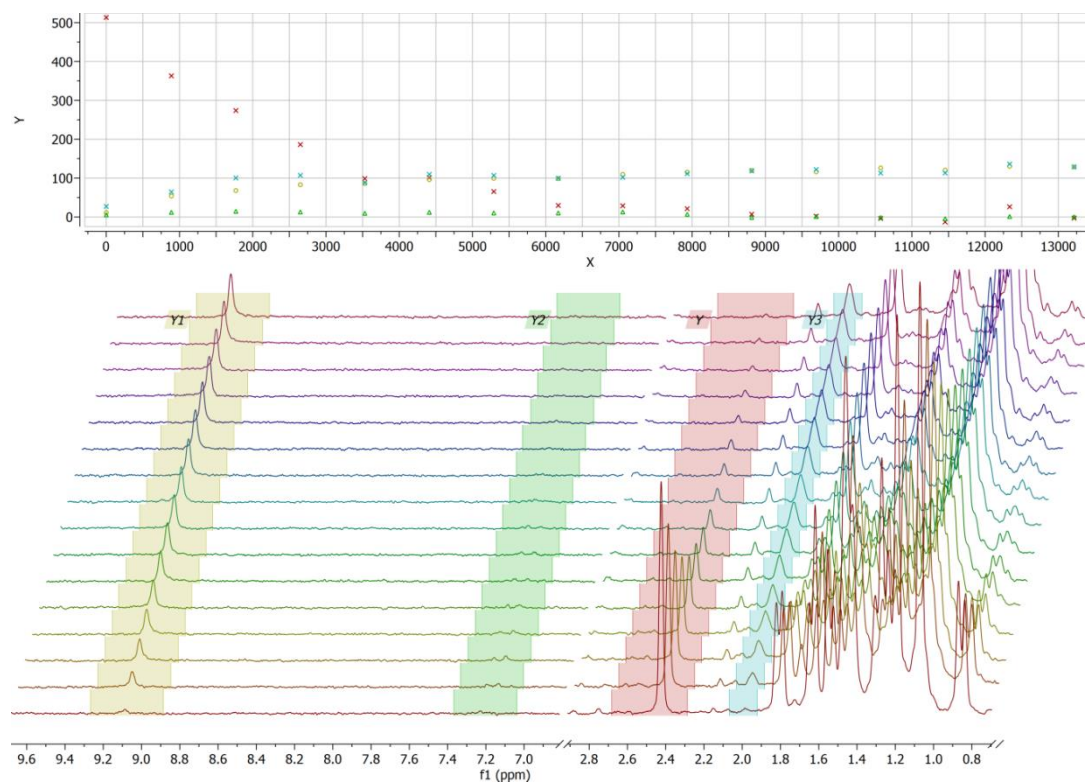

Fig. 22 Mestrenova – Chloro 80 °C – 2x higher concentration of starting material

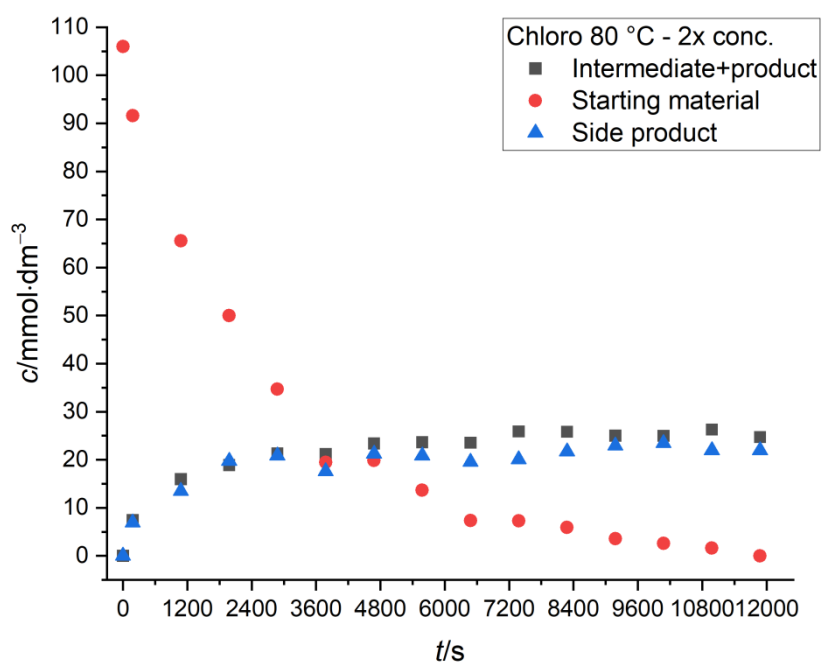

Fig. 23 Processed graph – Chloro 80 °C – 2x higher concentration of starting material

Table 21 Raw data – integral values – Chloro 80 °C – 2x higher concentration of starting material

| Time/s   | 80 °C - 2.0x c     |                                 |                                |                              |                         |
|----------|--------------------|---------------------------------|--------------------------------|------------------------------|-------------------------|
|          | product (8.92 ppm) | intermediate product (7.00 ppm) | product + intermediate product | starting material (2.25 ppm) | side product (1.99 ppm) |
| 0.00     | 11.5               | 4.9                             | 16.4                           | 513.1                        | 26.9                    |
| 900.00   | 53.6               | 11.9                            | 65.5                           | 363.4                        | 64.3                    |
| 1800.00  | 67.9               | 14.4                            | 82.3                           | 273.9                        | 100.5                   |
| 2700.00  | 83.1               | 12.9                            | 96.1                           | 186.1                        | 106.8                   |
| 3600.00  | 86.1               | 9.3                             | 95.4                           | 98.6                         | 88.0                    |
| 4500.00  | 96.0               | 12.2                            | 108.2                          | 101.1                        | 109.1                   |
| 5400.00  | 99.5               | 10.1                            | 109.6                          | 65.4                         | 106.8                   |
| 6300.00  | 98.9               | 10.2                            | 109.1                          | 29.2                         | 99.1                    |
| 7200.00  | 109.5              | 13.0                            | 122.5                          | 28.7                         | 102.3                   |
| 8100.00  | 115.0              | 7.1                             | 122.1                          | 20.8                         | 111.6                   |
| 9000.00  | 119.1              | -1.7                            | 117.4                          | 7.3                          | 118.6                   |
| 9900.00  | 116.4              | 0.7                             | 117.2                          | 2.0                          | 121.7                   |
| 10800.00 | 126.4              | -1.6                            | 124.8                          | -3.7                         | 113.2                   |
| 11700.00 | 120.4              | -4.6                            | 115.8                          | -13.1                        | 112.9                   |
| 12600.00 | 130.2              | 0.8                             | 130.9                          | 25.8                         | 136.3                   |
| 13500.00 | 128.3              | 0.2                             | 128.5                          | -2.7                         | 128.5                   |

Table 22 Processed data – Chloro 80 °C – 2x higher concentration of starting material

| Time/s   | 80 °C - 2.0x c        |                                    |                                   |                                 |                            |
|----------|-----------------------|------------------------------------|-----------------------------------|---------------------------------|----------------------------|
|          | product (8.92 ppm)/mM | intermediate product (7.00 ppm)/mM | product + intermediate product/mM | starting material (2.25 ppm)/mM | side product (1.99 ppm)/mM |
| 180.00   | 4.3                   | 3.1                                | 7.4                               | 91.6                            | 7.0                        |
| 1080.00  | 11.6                  | 4.4                                | 16.0                              | 65.6                            | 13.5                       |
| 1980.00  | 14.1                  | 4.8                                | 18.9                              | 50.0                            | 19.8                       |
| 2880.00  | 16.8                  | 4.5                                | 21.3                              | 34.7                            | 20.9                       |
| 3780.00  | 17.3                  | 3.9                                | 21.2                              | 19.4                            | 17.6                       |
| 4680.00  | 19.0                  | 4.4                                | 23.4                              | 19.9                            | 21.3                       |
| 5580.00  | 19.6                  | 4.0                                | 23.6                              | 13.7                            | 20.9                       |
| 6480.00  | 19.5                  | 4.1                                | 23.5                              | 7.4                             | 19.5                       |
| 7380.00  | 21.3                  | 4.5                                | 25.9                              | 7.3                             | 20.1                       |
| 8280.00  | 22.3                  | 3.5                                | 25.8                              | 5.9                             | 21.7                       |
| 9180.00  | 23.0                  | 2.0                                | 25.0                              | 3.5                             | 22.9                       |
| 10080.00 | 22.6                  | 2.4                                | 25.0                              | 2.6                             | 23.5                       |
| 10980.00 | 24.3                  | 2.0                                | 26.3                              | 1.6                             | 22.0                       |
| 11880.00 | 23.2                  | 1.5                                | 24.7                              | 0.0                             | 21.9                       |
| 0.00     | 0.0                   | 0.0                                | 0.0                               | 106.0                           | 0.0                        |

\* Correction: + 3 minutes, slope + 13.1



## KIN-80-Chloro 3xC

Derivative: X= Chloro

Concentration: 159 mM

Base: 5 equiv. Temperature: 80 °C

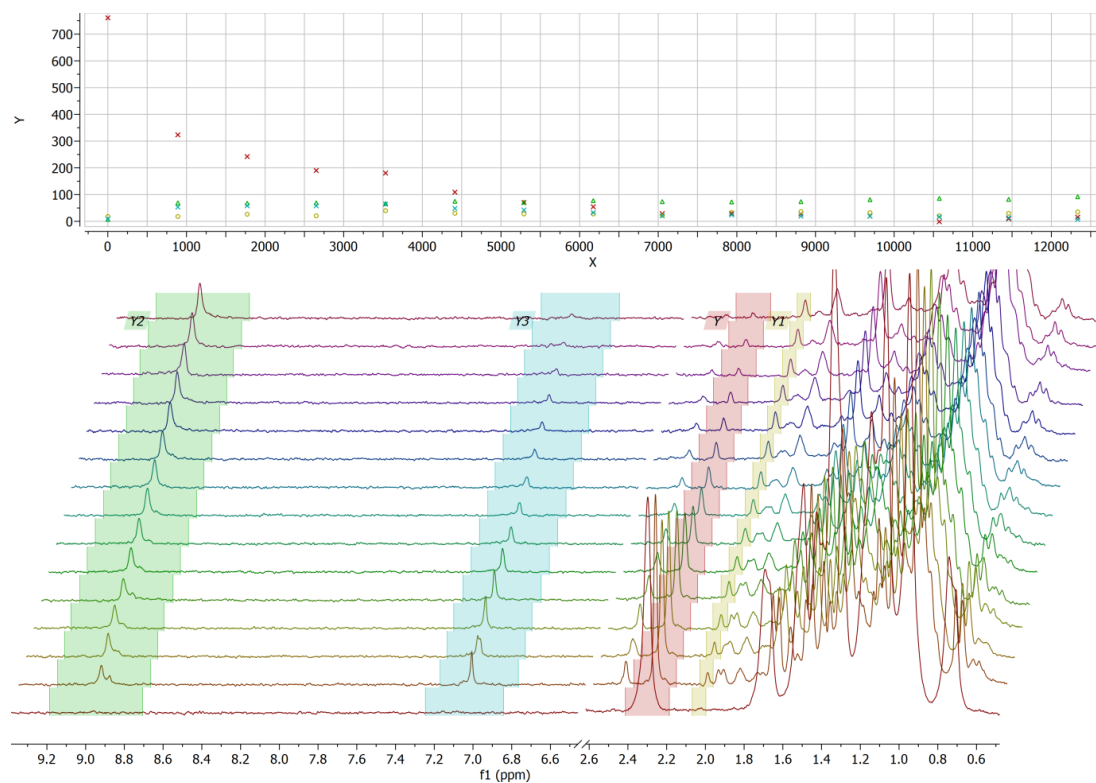

Fig. 24 Mestrenova – Chloro 80 °C – 3x higher concentration of starting material

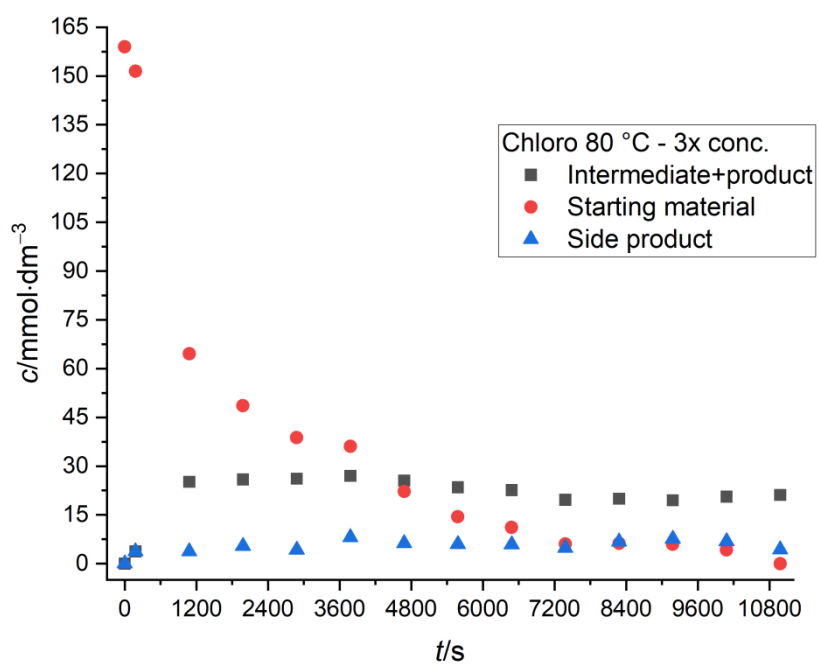

Fig. 25 Processed graph – Chloro 80 °C – 3x higher concentration of starting material

Table 23 Raw data – integral values – Chloro 80 °C – 3x higher concentration of starting material

| Time/s   | 80 °C - 3.0x c     |                                 |                                |                              |                         |
|----------|--------------------|---------------------------------|--------------------------------|------------------------------|-------------------------|
|          | product (8.92 ppm) | intermediate product (7.00 ppm) | product + intermediate product | starting material (2.25 ppm) | side product (1.99 ppm) |
| 0.00     | 7.3                | 8.7                             | 16.1                           | 749.6                        | 17.4                    |
| 900.00   | 69.2               | 52.9                            | 122.2                          | 318.8                        | 17.6                    |
| 1800.00  | 67.3               | 58.5                            | 125.8                          | 239.8                        | 25.4                    |
| 2700.00  | 68.4               | 58.5                            | 127.0                          | 190.9                        | 19.9                    |
| 3600.00  | 66.8               | 64.5                            | 131.3                          | 177.6                        | 38.9                    |
| 4500.00  | 75.2               | 48.9                            | 124.2                          | 108.6                        | 29.7                    |
| 5400.00  | 71.3               | 42.6                            | 113.9                          | 70.0                         | 28.3                    |
| 6300.00  | 77.1               | 32.4                            | 109.6                          | 53.9                         | 27.9                    |
| 7200.00  | 74.0               | 20.6                            | 94.7                           | 28.6                         | 22.8                    |
| 8100.00  | 72.2               | 24.2                            | 96.4                           | 29.8                         | 32.3                    |
| 9000.00  | 74.4               | 19.6                            | 94.0                           | 28.3                         | 36.7                    |
| 9900.00  | 80.8               | 18.7                            | 99.5                           | 19.4                         | 32.5                    |
| 10800.00 | 85.6               | 16.6                            | 102.2                          | -1.3                         | 20.5                    |
| 11700.00 | 82.2               | 13.6                            | 95.8                           | 10.1                         | 30.2                    |
| 12600.00 | 92.2               | 7.3                             | 99.5                           | 15.8                         | 34.9                    |

Table 24 Processed data – Chloro 80 °C – 3x higher concentration of starting material

| Processed data - concentration normalization |                       |                                    |                                   |                                 |                            |  |
|----------------------------------------------|-----------------------|------------------------------------|-----------------------------------|---------------------------------|----------------------------|--|
| 80 °C - 3.0x c                               |                       |                                    |                                   |                                 |                            |  |
| Time/s                                       | product (8.92 ppm)/mM | intermediate product (7.00 ppm)/mM | product + intermediate product/mM | starting material (2.25 ppm)/mM | side product (1.99 ppm)/mM |  |
| 180.00                                       | 1.7                   | 2.0                                | 3.8                               | 151.5                           | 3.8                        |  |
| 1080.00                                      | 14.2                  | 10.9                               | 25.2                              | 64.6                            | 3.8                        |  |
| 1980.00                                      | 13.8                  | 12.1                               | 25.9                              | 48.6                            | 5.4                        |  |
| 2880.00                                      | 14.1                  | 12.1                               | 26.1                              | 38.8                            | 4.3                        |  |
| 3780.00                                      | 13.7                  | 13.3                               | 27.0                              | 36.1                            | 8.1                        |  |
| 4680.00                                      | 15.4                  | 10.1                               | 25.6                              | 22.2                            | 6.2                        |  |
| 5580.00                                      | 14.6                  | 8.9                                | 23.5                              | 14.4                            | 6.0                        |  |
| 6480.00                                      | 15.8                  | 6.8                                | 22.6                              | 11.1                            | 5.9                        |  |
| 7380.00                                      | 15.2                  | 4.4                                | 19.6                              | 6.0                             | 4.9                        |  |
| 8280.00                                      | 14.8                  | 5.1                                | 20.0                              | 6.3                             | 6.8                        |  |
| 9180.00                                      | 15.3                  | 4.2                                | 19.5                              | 6.0                             | 7.7                        |  |
| 10080.00                                     | 16.6                  | 4.0                                | 20.6                              | 4.2                             | 6.8                        |  |
| 10980.00                                     | 17.5                  | 3.6                                | 21.1                              | 0.0                             | 4.4                        |  |
| 0.00                                         | 0.0                   | 0.0                                | 0.0                               | 159.0                           | 0.0                        |  |

\* Correction: + 3 minutes, slope + 1.3

## KIN-80-Chloro-50B

Derivative: X= Chloro

Concentration: 53 mM

Base: 10 equiv. Temperature: 80 °C

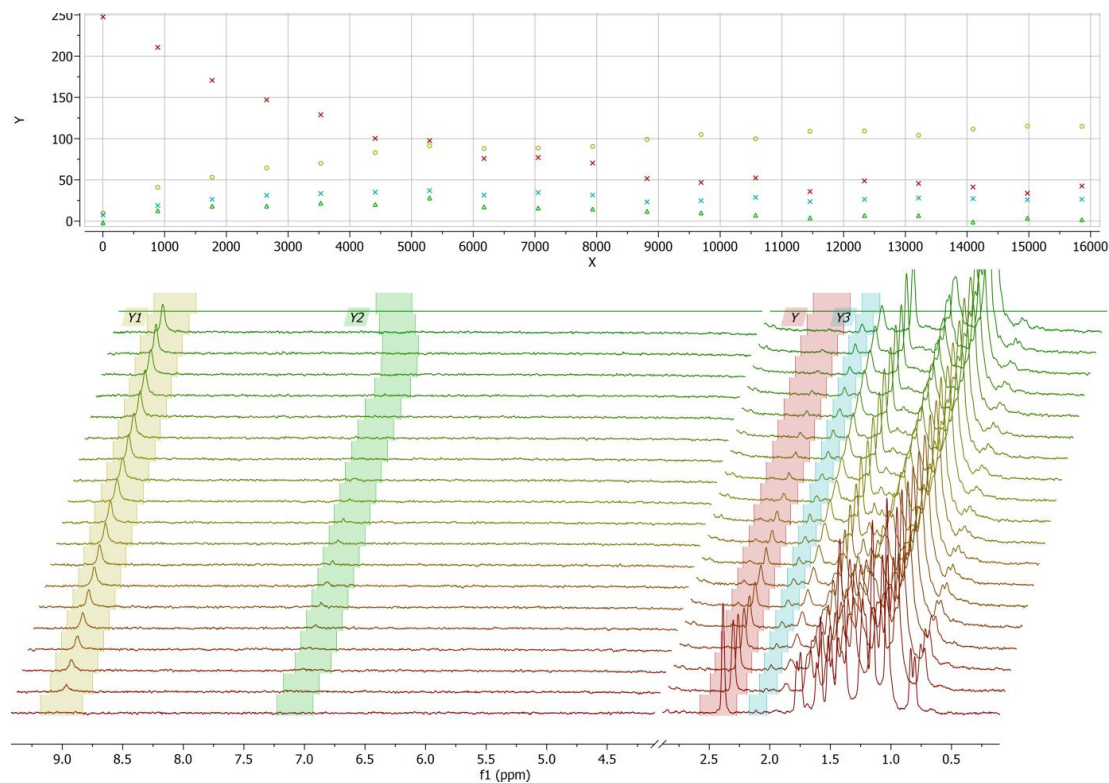

Fig. 26 Mestrenova – Chloro 80 °C – 50 eq. of base

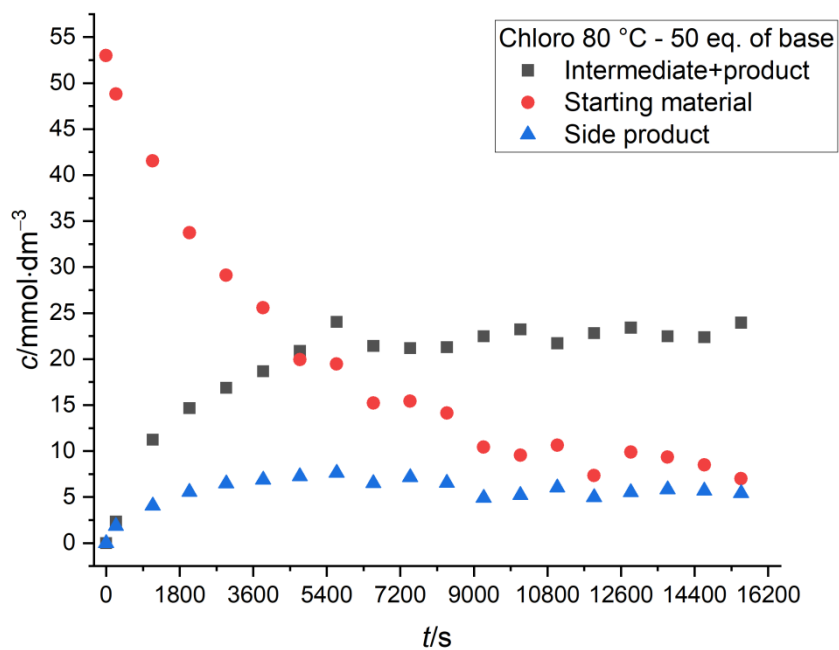

Fig. 27 Processed graph – Chloro 80 °C – 50 eq. of base

Table 25 Raw data – integral values – Chloro 80 °C – 50 eq. of base

| Time/s | 80 °C 50 B         |                                 |                                |                              |                         |
|--------|--------------------|---------------------------------|--------------------------------|------------------------------|-------------------------|
|        | product (8.92 ppm) | intermediate product (7.00 ppm) | product + intermediate product | starting material (2.25 ppm) | side product (1.99 ppm) |
| 0      | 10.1               | -1.9                            | 8.1                            | 247.6                        | 7.7                     |
| 900    | 41.0               | 12.7                            | 53.7                           | 210.5                        | 18.9                    |
| 1800   | 53.2               | 18.0                            | 71.2                           | 170.5                        | 26.5                    |
| 2700   | 64.5               | 18.0                            | 82.5                           | 146.9                        | 31.2                    |
| 3600   | 70.2               | 21.5                            | 91.7                           | 129.0                        | 33.4                    |
| 4500   | 82.8               | 20.1                            | 102.9                          | 100.1                        | 35.1                    |
| 5400   | 91.3               | 27.9                            | 119.1                          | 97.6                         | 37.2                    |
| 6300   | 88.2               | 17.6                            | 105.7                          | 76.0                         | 31.4                    |
| 7200   | 88.6               | 16.0                            | 104.6                          | 77.0                         | 34.6                    |
| 8100   | 90.3               | 14.8                            | 105.1                          | 70.4                         | 31.6                    |
| 9000   | 99.2               | 11.9                            | 111.1                          | 51.5                         | 23.2                    |
| 9900   | 105.0              | 10.0                            | 115.0                          | 46.9                         | 24.8                    |
| 10800  | 99.9               | 7.3                             | 107.2                          | 52.4                         | 28.9                    |
| 11700  | 108.8              | 4.1                             | 112.9                          | 35.7                         | 23.5                    |
| 12600  | 109.3              | 6.6                             | 115.9                          | 48.7                         | 26.4                    |
| 13500  | 104.2              | 7.0                             | 111.1                          | 45.8                         | 27.8                    |
| 14400  | 111.7              | -1.1                            | 110.6                          | 41.5                         | 27.3                    |
| 15300  | 115.3              | 3.5                             | 118.7                          | 34.0                         | 25.9                    |
| 16200  | 114.7              | 1.8                             | 116.5                          | 42.6                         | 26.2                    |

Table 26 Processed data – Chloro 80 °C – 50 eq. of base

| Processed data - concentration normalization |                       |                                    |                                   |                                 |                            |
|----------------------------------------------|-----------------------|------------------------------------|-----------------------------------|---------------------------------|----------------------------|
| Time/s                                       | 80 °C 50 B            |                                    |                                   |                                 |                            |
|                                              | product (8.92 ppm)/mM | intermediate product (7.00 ppm)/mM | product + intermediate product/mM | starting material (2.25 ppm)/mM | side product (1.99 ppm)/mM |
| 240                                          | 2.3                   | 0.0                                | 2.3                               | 48.8                            | 1.9                        |
| 1140                                         | 8.4                   | 2.9                                | 11.2                              | 41.5                            | 4.1                        |
| 2040                                         | 10.8                  | 3.9                                | 14.7                              | 33.7                            | 5.6                        |
| 2940                                         | 13.0                  | 3.9                                | 16.9                              | 29.1                            | 6.5                        |
| 3840                                         | 14.1                  | 4.6                                | 18.7                              | 25.6                            | 6.9                        |
| 4740                                         | 16.6                  | 4.3                                | 20.9                              | 20.0                            | 7.2                        |
| 5640                                         | 18.2                  | 5.8                                | 24.0                              | 19.5                            | 7.6                        |
| 6540                                         | 17.6                  | 3.8                                | 21.4                              | 15.2                            | 6.5                        |
| 7440                                         | 17.7                  | 3.5                                | 21.2                              | 15.4                            | 7.1                        |
| 8340                                         | 18.0                  | 3.3                                | 21.3                              | 14.1                            | 6.5                        |
| 9240                                         | 19.8                  | 2.7                                | 22.5                              | 10.4                            | 4.9                        |
| 10140                                        | 20.9                  | 2.3                                | 23.2                              | 9.5                             | 5.2                        |
| 11040                                        | 19.9                  | 1.8                                | 21.7                              | 10.6                            | 6.0                        |
| 11940                                        | 21.7                  | 1.2                                | 22.8                              | 7.4                             | 5.0                        |
| 12840                                        | 21.7                  | 1.7                                | 23.4                              | 9.9                             | 5.5                        |
| 13740                                        | 20.7                  | 1.7                                | 22.5                              | 9.3                             | 5.8                        |
| 14640                                        | 22.2                  | 0.2                                | 22.4                              | 8.5                             | 5.7                        |
| 15540                                        | 22.9                  | 1.0                                | 24.0                              | 7.0                             | 5.4                        |
| 0                                            | 0.0                   | 0.0                                | 0.0                               | 53.0                            | 0.0                        |

\* Correction: + 4 minutes, slope + 1.9

Evaluation of kinetic data points for solvolysis of 1-halogeno-2-amine adamantanes using kinetic model for parallel reaction.

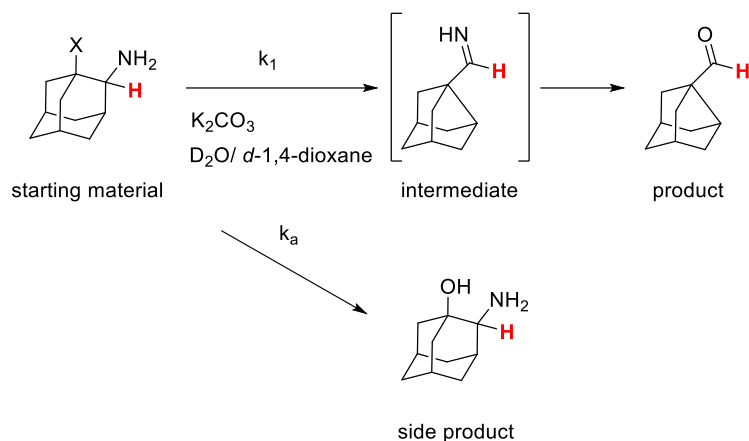

Figure 1 Kinetic model for solvolysis of 1-halogeno-2-amine adamantanes used; X= I, Br and Cl.

1-Halogen 2-amine adamantanes decompose in alkali aqueous solution to form imine as the main product and alcohol as a side product (Fig. 1). The imine product hydrolyses to an aldehyde. Kinetics of formation of the main product was evaluated accordingly to monomolecular model for parallel reaction using Eqs. 1-7. Concentration of product was taken as the sum of conc. of imine plus conc. of aldehyde. Experimental data points and regression curves for 1-iodo-2-amine adamantane solvolysis at 50 °C and the initial concentration of starting material equals to 53 mg/L =  $a_0 = [\text{starting material}] + [\text{product}] + [\text{side product}]$  are exemplified in Fig. 2. Calculated apparent rate constants are summarised in Tab. 1 for several temperatures. The chlorine derivative reacted slowly at 60 °C so that its rate constants at 50 °C in Tab. 1 were extrapolated using experimental data measured at 60, 70 and 80 °C and Arrhenius equation.

$$-\frac{d[\text{product}]}{dt} = (k_I + k_A)[\text{starting material}] \quad (1)$$

$$\frac{d[\text{product}]}{dt} = k_I[\text{starting material}] \quad (2)$$

$$\frac{d[\text{side product}]}{dt} = k_A[\text{starting material}] \quad (3)$$

$$\sum k = k_I + k_A \quad (4)$$

$$[\text{starting material}] = a_0 e^{-(\sum k)t} \quad (5)$$

$$[\text{starting material}] = \frac{k_I a_0}{\sum k} (e^{-(\sum k)t} + 1) \quad (6)$$

$$[\text{side product}] = \frac{k_A a_0}{\sum k} (e^{-(\sum k)t} + 1) \quad (7)$$

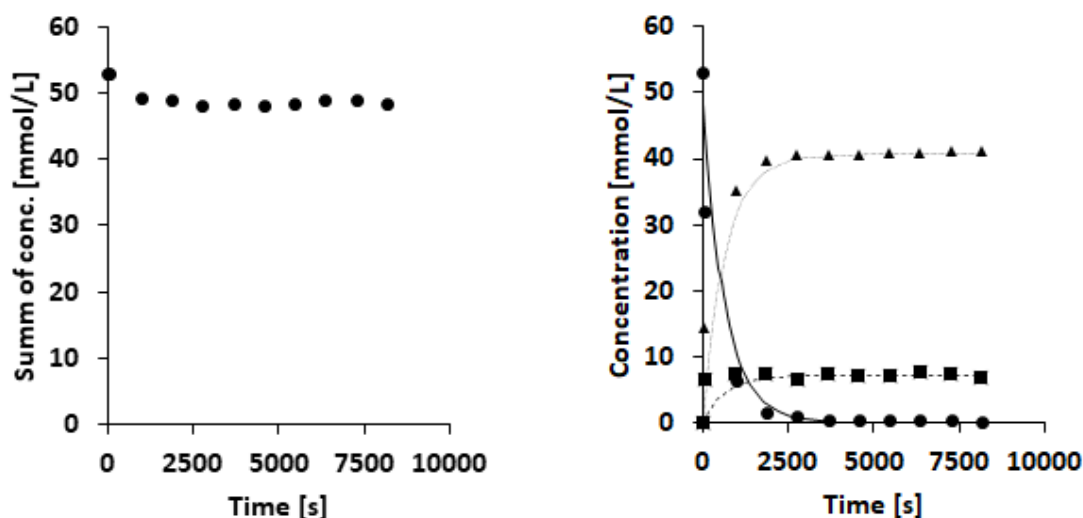

a) b)  
Figure 2 Kinetic data for solvolysis of 1-iodo-2-amine adamantane at 50 °C: a) Dependence of sum of concentrations  $a_0 = [\text{starting material}] + [\text{product}] + [\text{side product}]$  in time; b) Data points and regression curves of time dependence of concentrations of starting material, product and side product.

Table 1 Apparent first order kinetic constants of solvolysis of 1-halogeno-2-amino adamantanes.

| Temp.<br>[°C] | X = I      |                        |       | X = Br     |                        |       | X = Cl     |                        |       |
|---------------|------------|------------------------|-------|------------|------------------------|-------|------------|------------------------|-------|
|               | $\Sigma k$ | $k_1$                  | $k_A$ | $\Sigma k$ | $k_1$                  | $k_A$ | $\Sigma k$ | $k_1$                  | $k_A$ |
|               |            | $\times 10^{-5} [1/s]$ |       |            | $\times 10^{-5} [1/s]$ |       |            | $\times 10^{-5} [1/s]$ |       |
| 25            | 13         | 8.0                    | 5.0   |            |                        |       |            |                        |       |
| 40            | 60         | 43                     | 17    | 40         | 27                     | 13    |            |                        |       |
| 50            | 150        | 130                    | 23    | 150        | 125                    | 21    | 4.0        | 3.0                    | 1.0   |
| 60            |            |                        |       |            |                        |       | 10         | 7.0                    | 2.0   |
| 70            |            |                        |       |            |                        |       | 38         | 31                     | 7.0   |
| 80            |            |                        |       | 300        | 270                    | 30    | 70         | 55                     | 15    |

Apparent first order kinetic constants estimated for solvolysis of 1-halogeno-2-amine adamantanes to the main product at 50 °C are within the range:  $k_1 = (130 \pm 20) \times 10^{-5} \text{ s}^{-1}$  for X = I;  $k_1 = (125 \pm 20) \times 10^{-5} \text{ s}^{-1}$  for X = Br; and  $k_1 = (3 \pm 0.2) \times 10^{-5} \text{ s}^{-1}$  for X = Cl.



## 4. NMR spectra of compounds **3-26**

### Compound **3a**

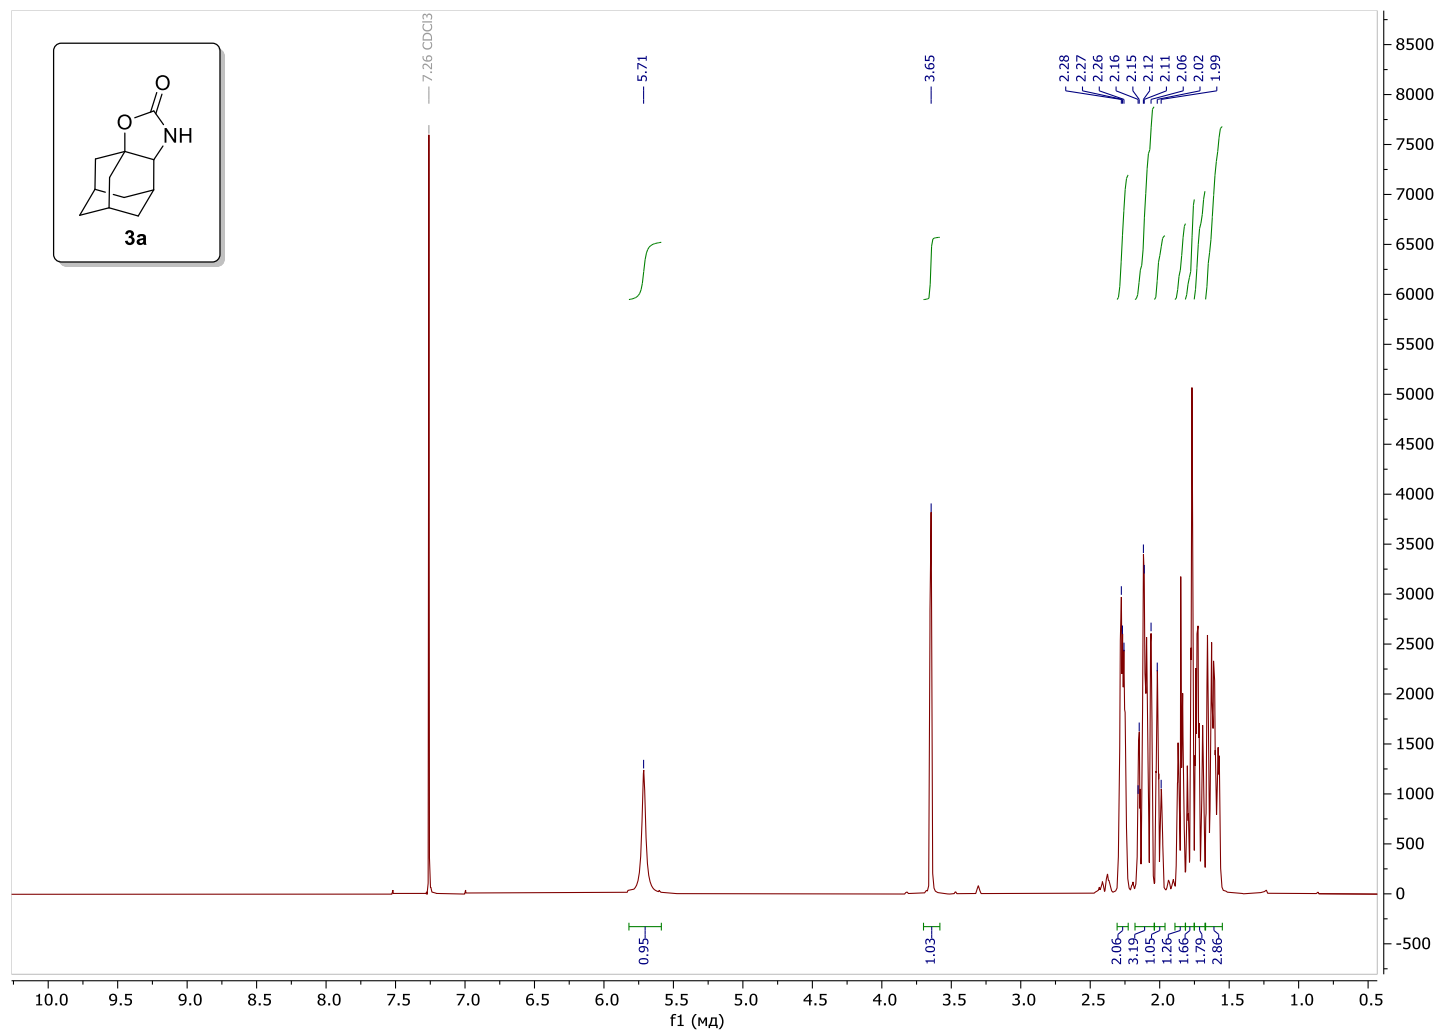

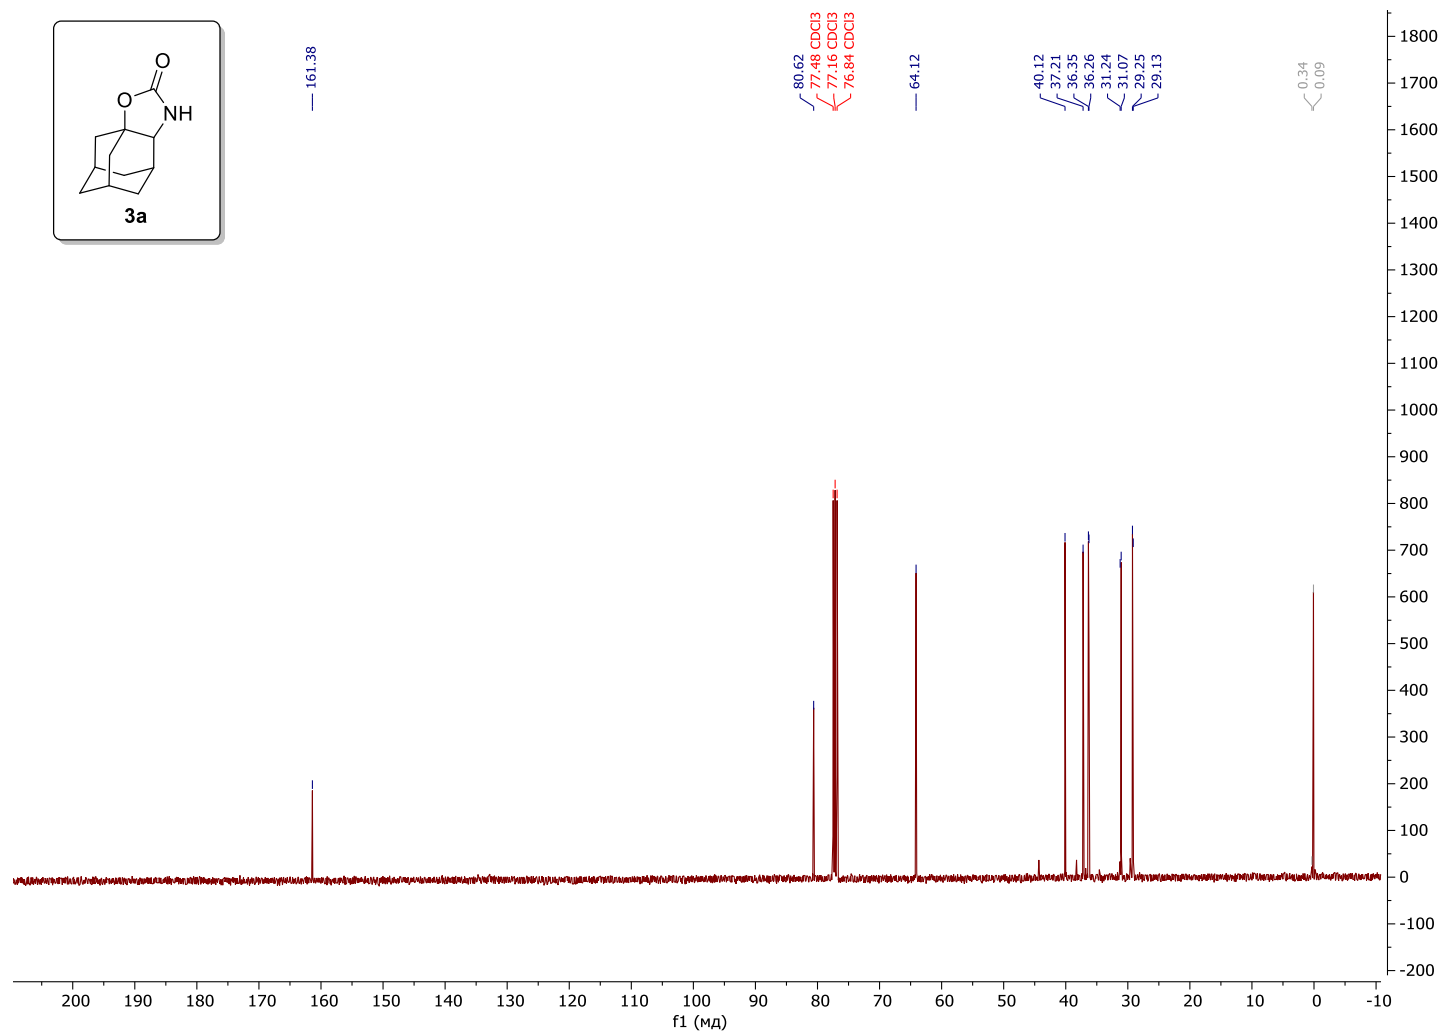

# Compound 3b

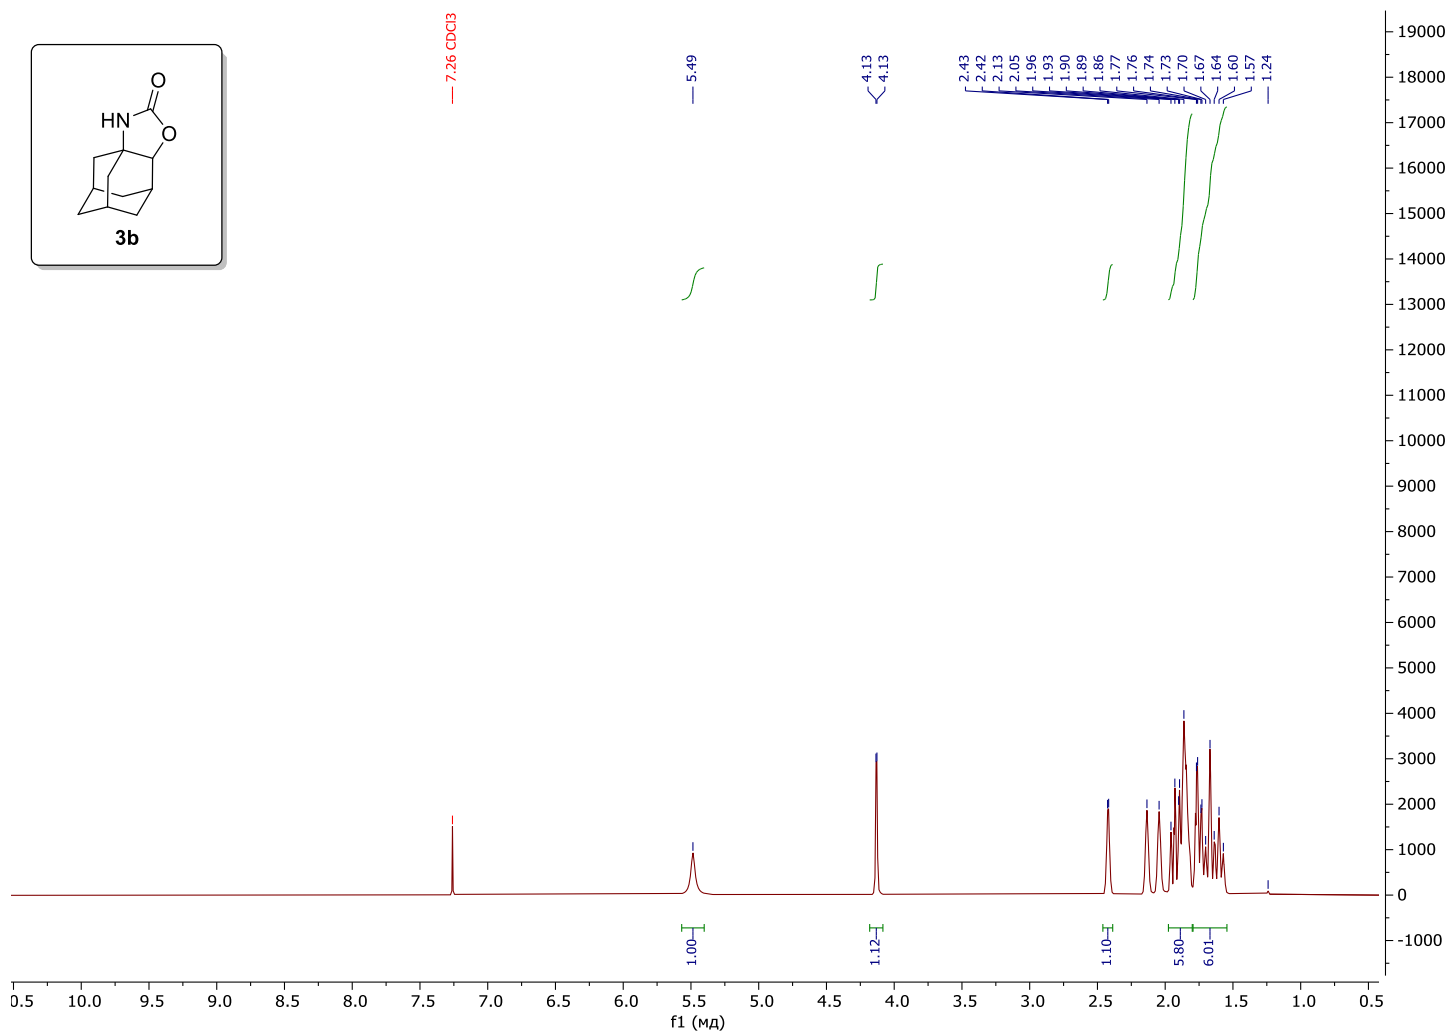

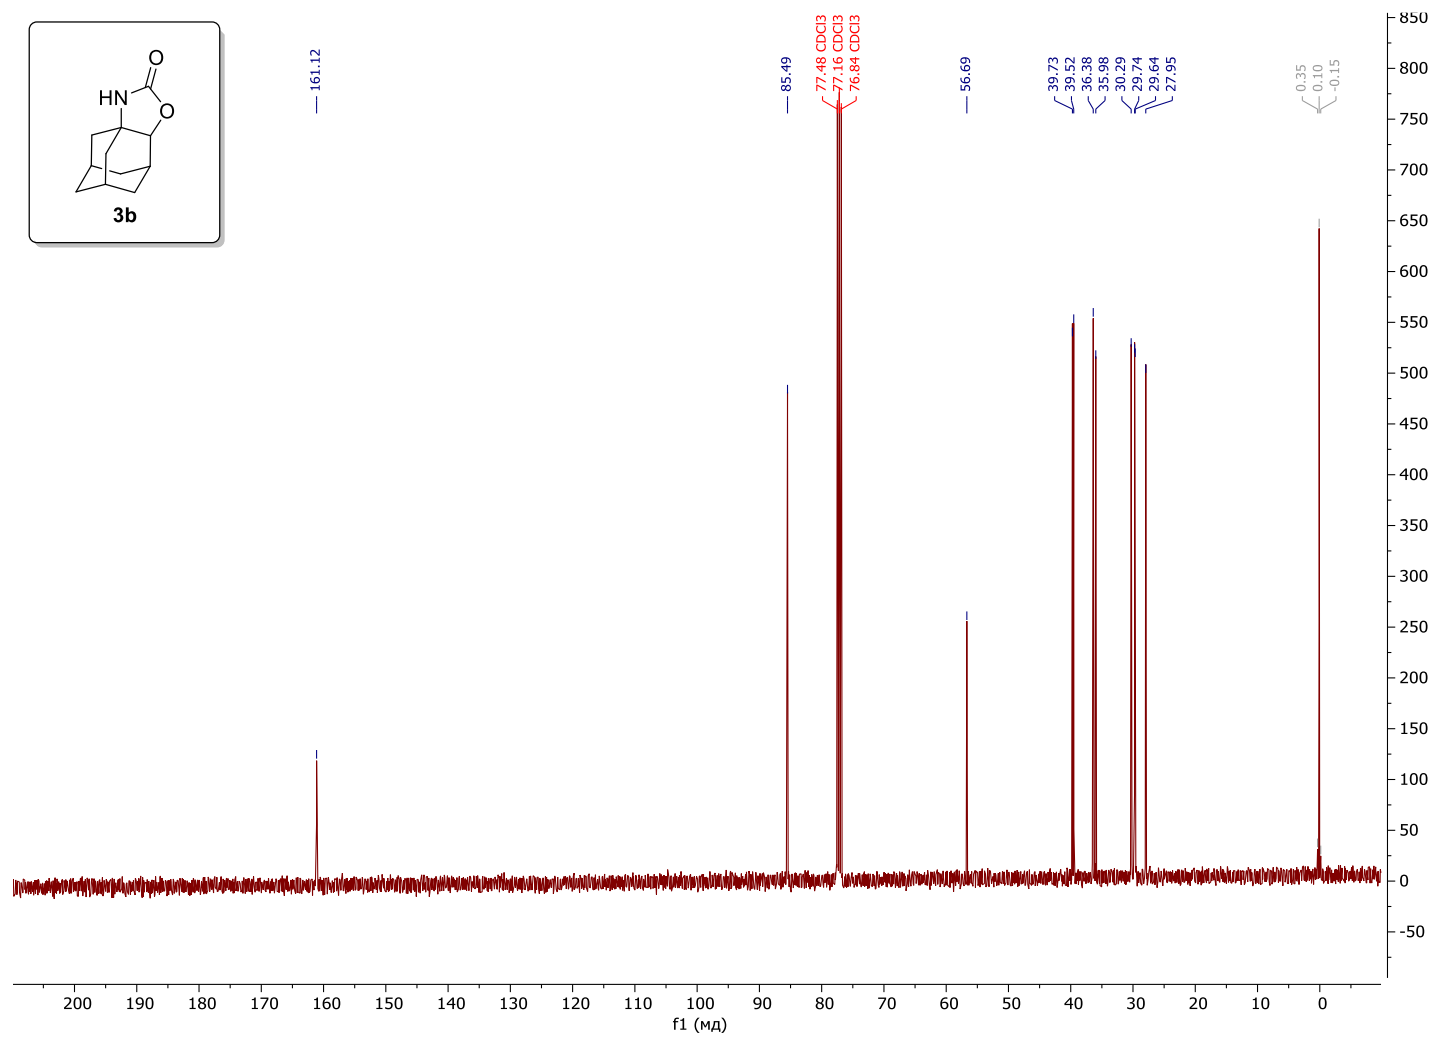

# Compound 3c

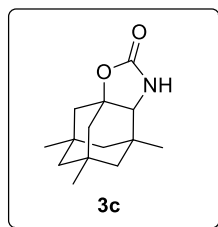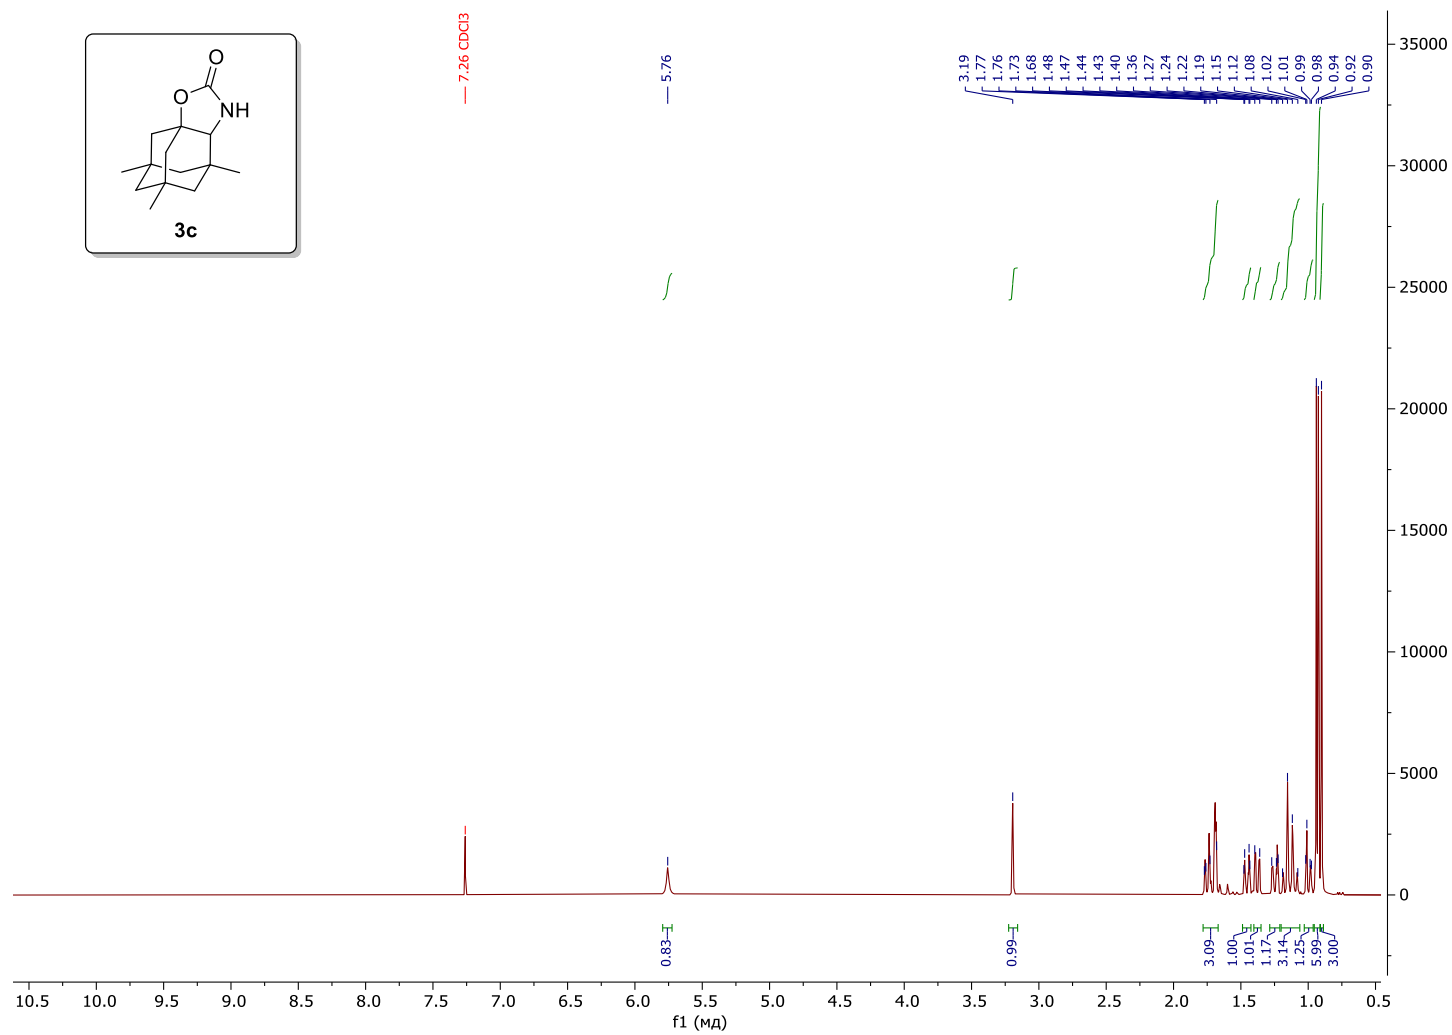

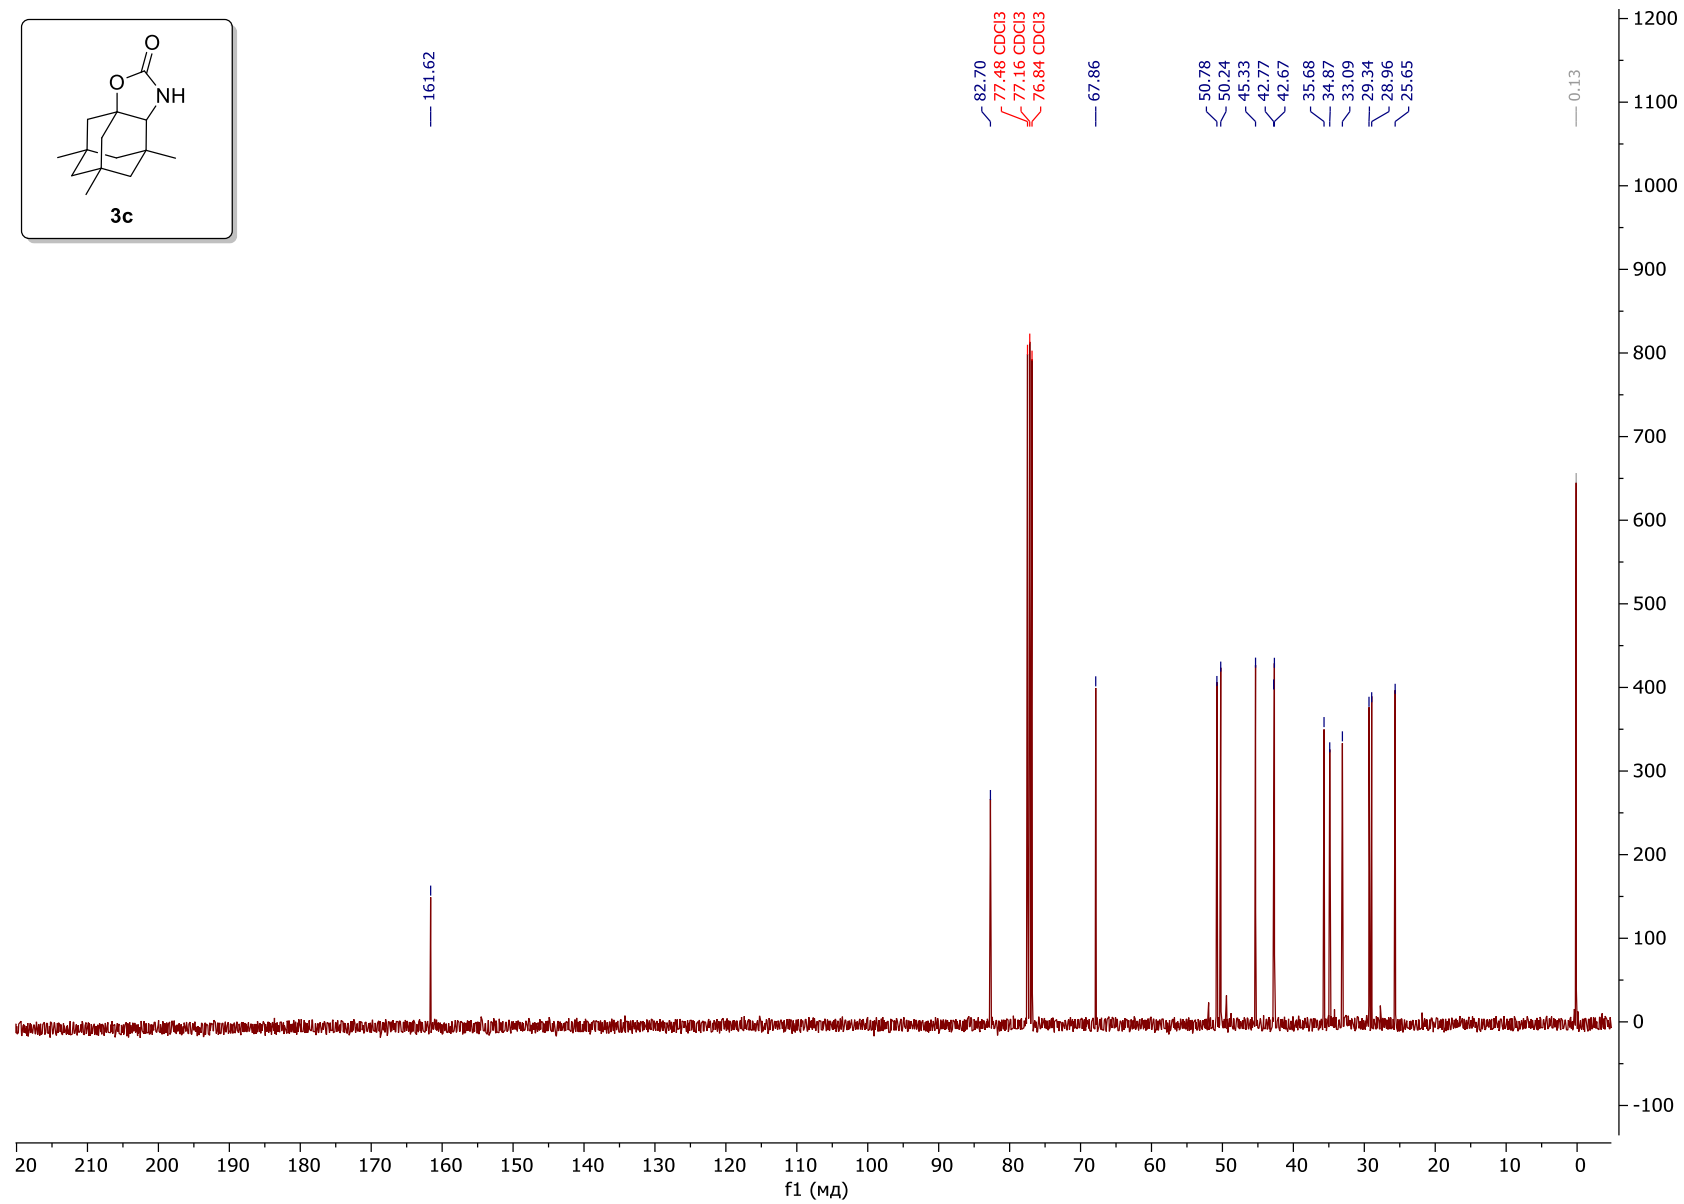

# Compound 3d

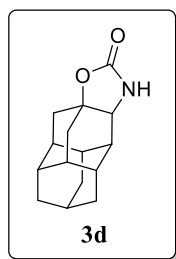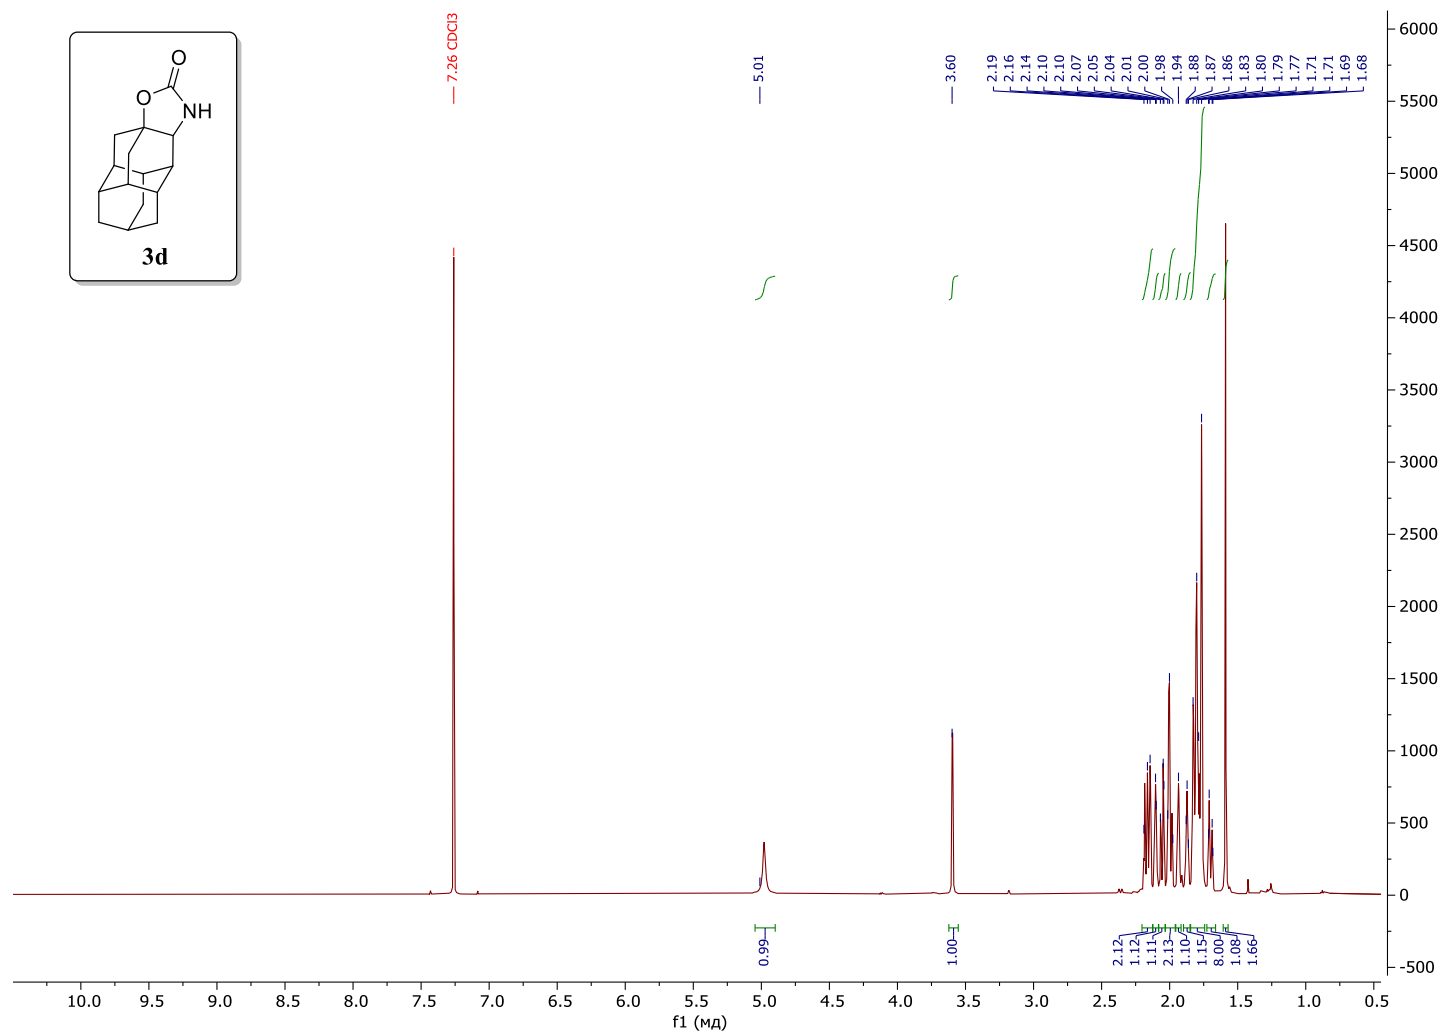

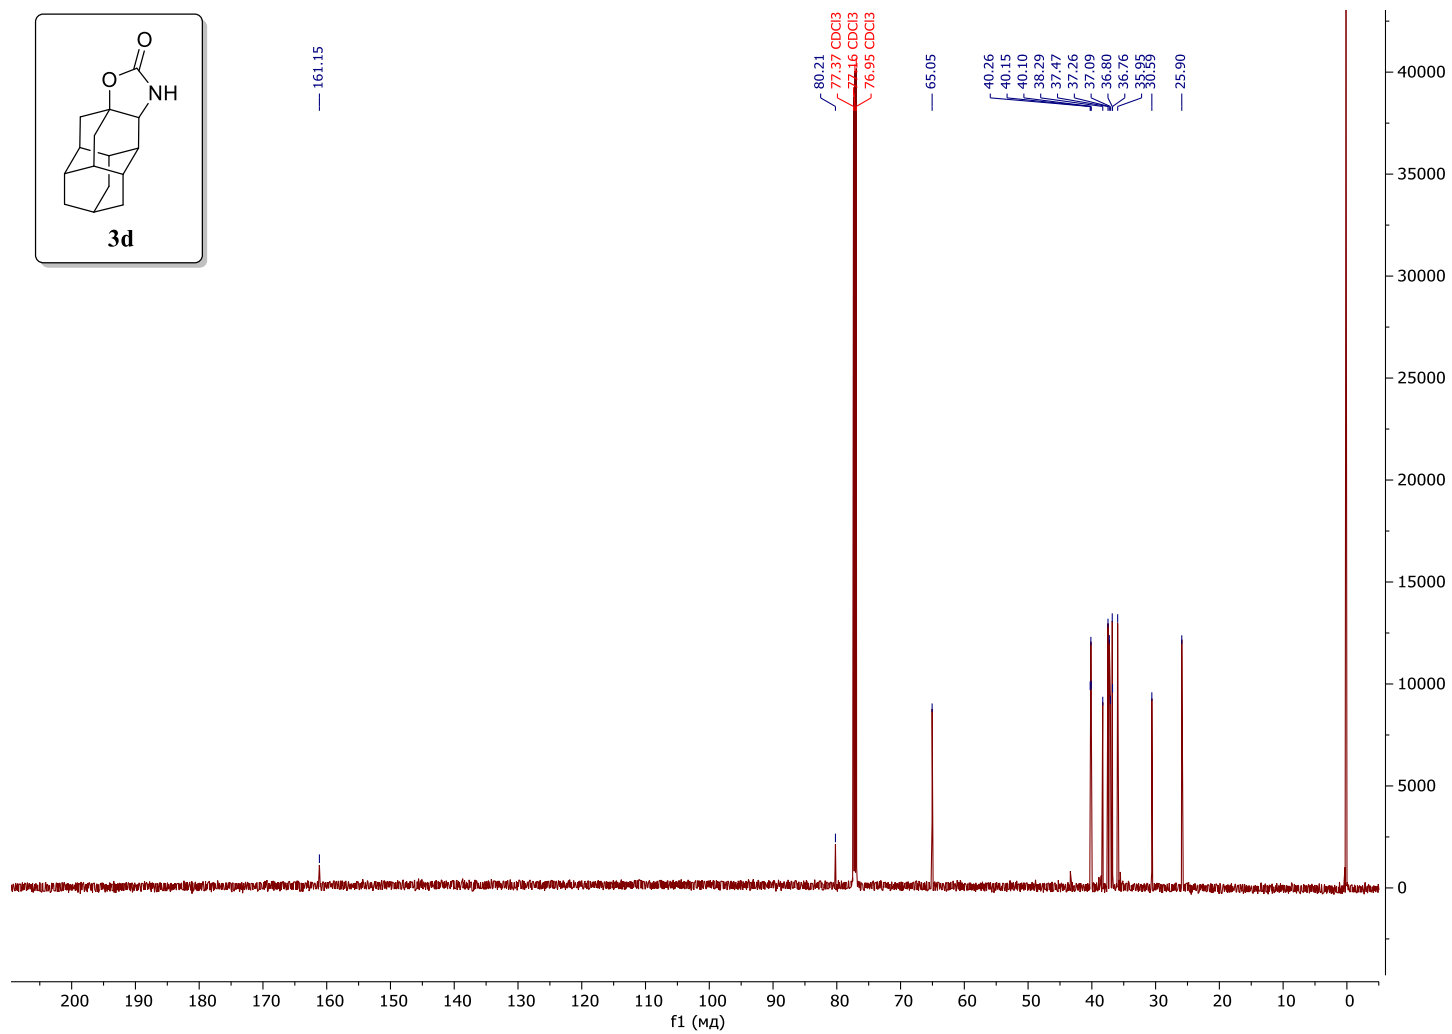



# Compound 3e

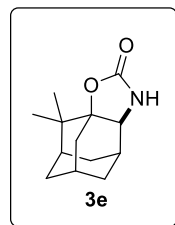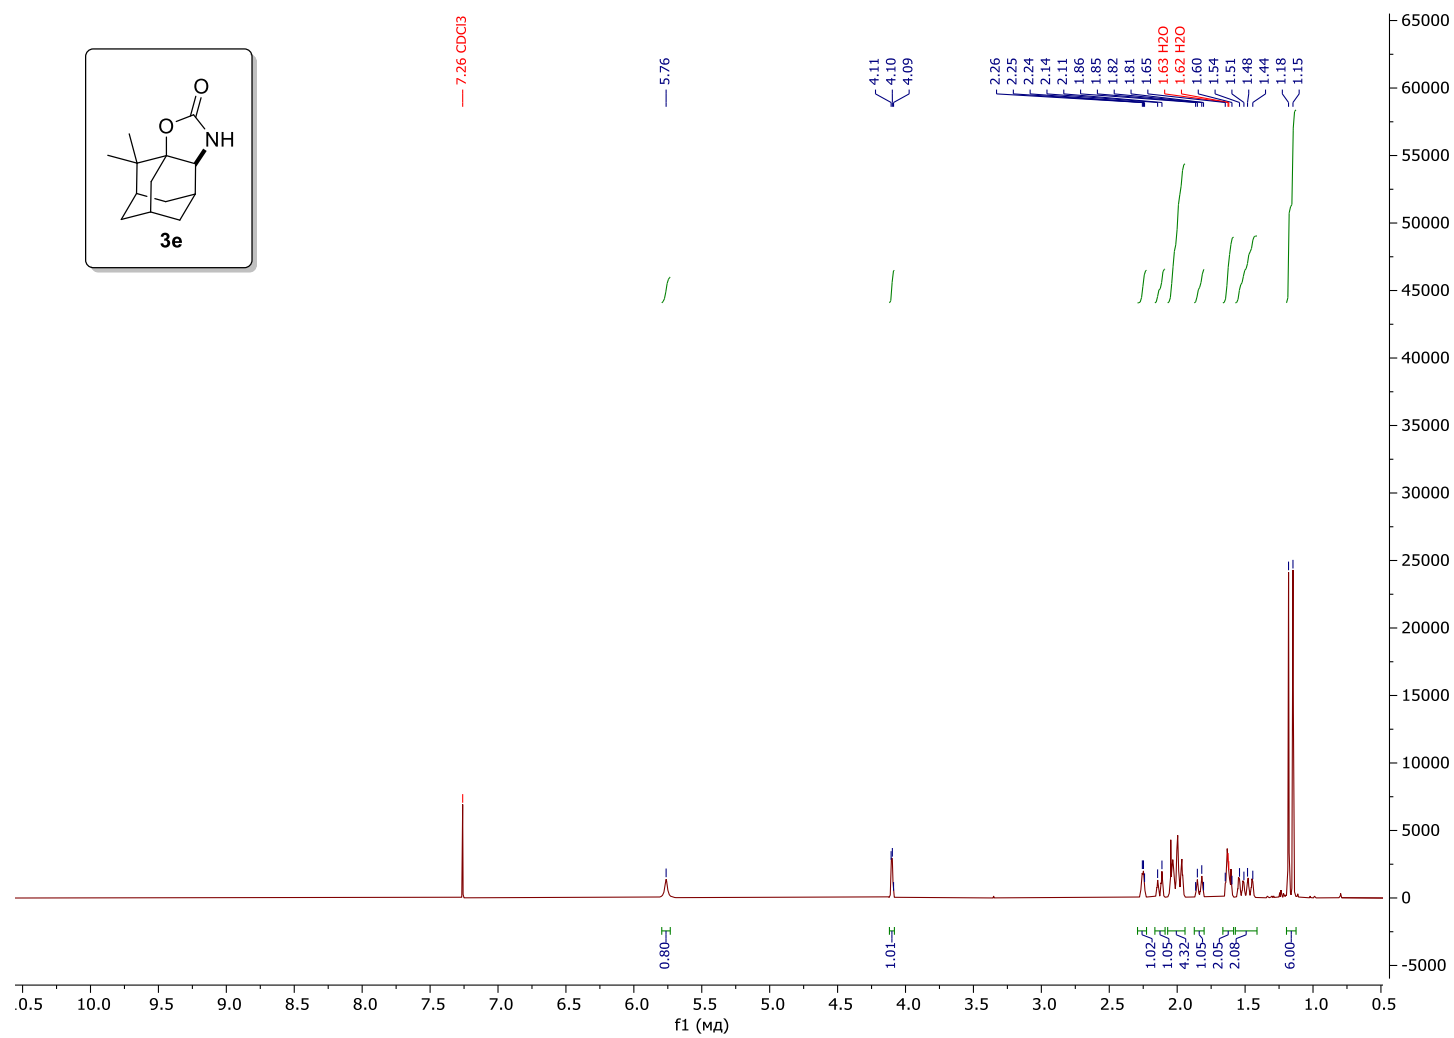

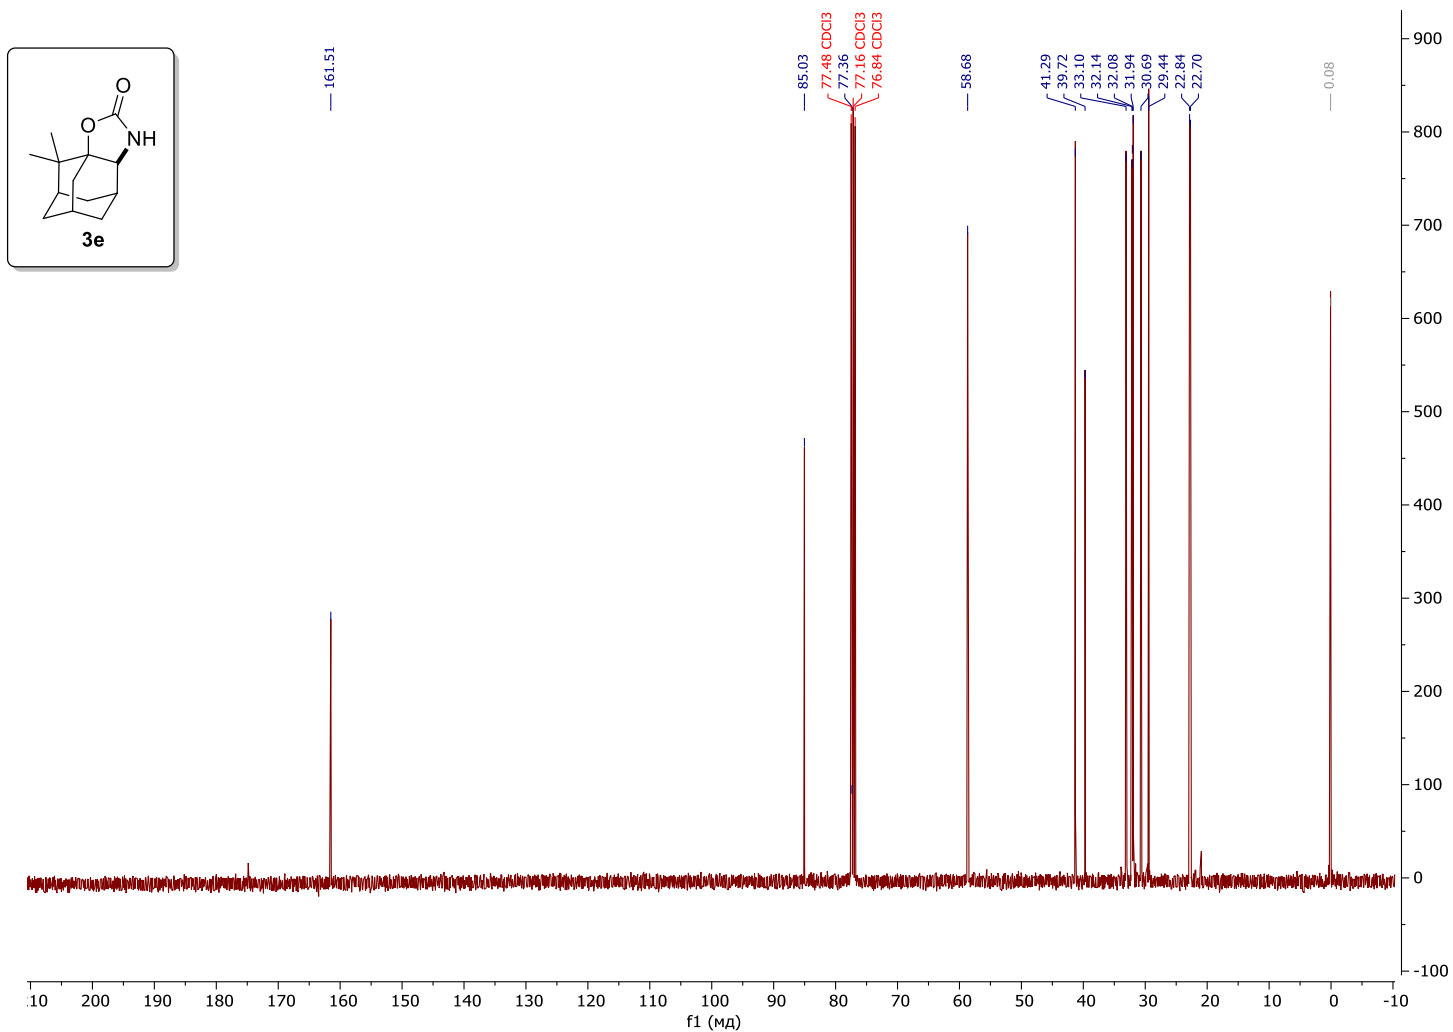

# Compound 4aa

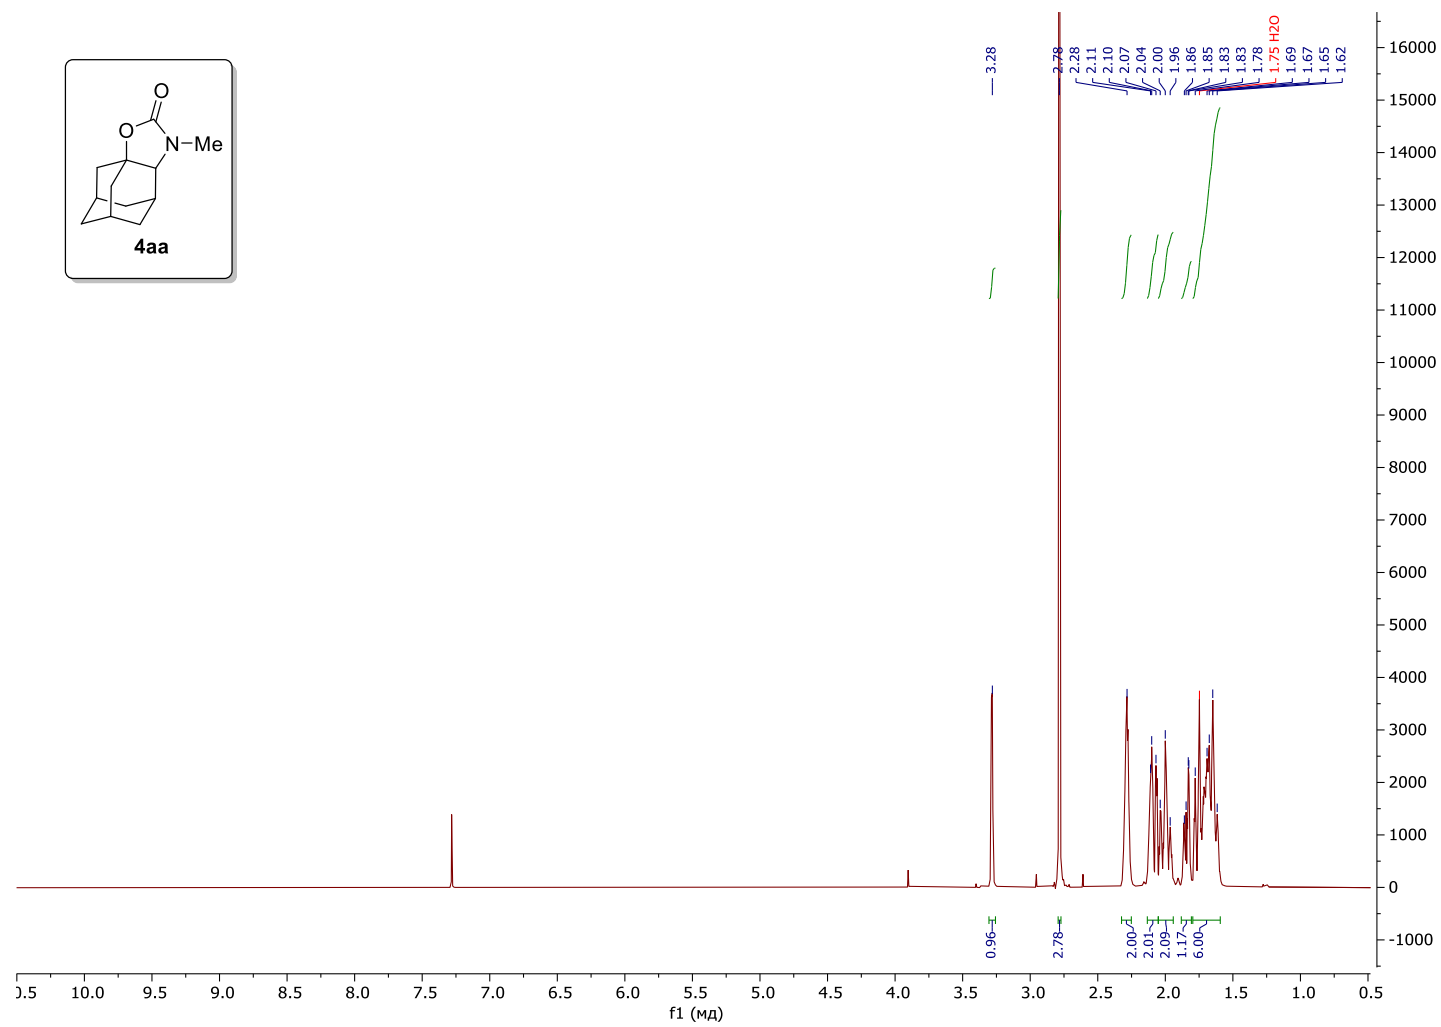

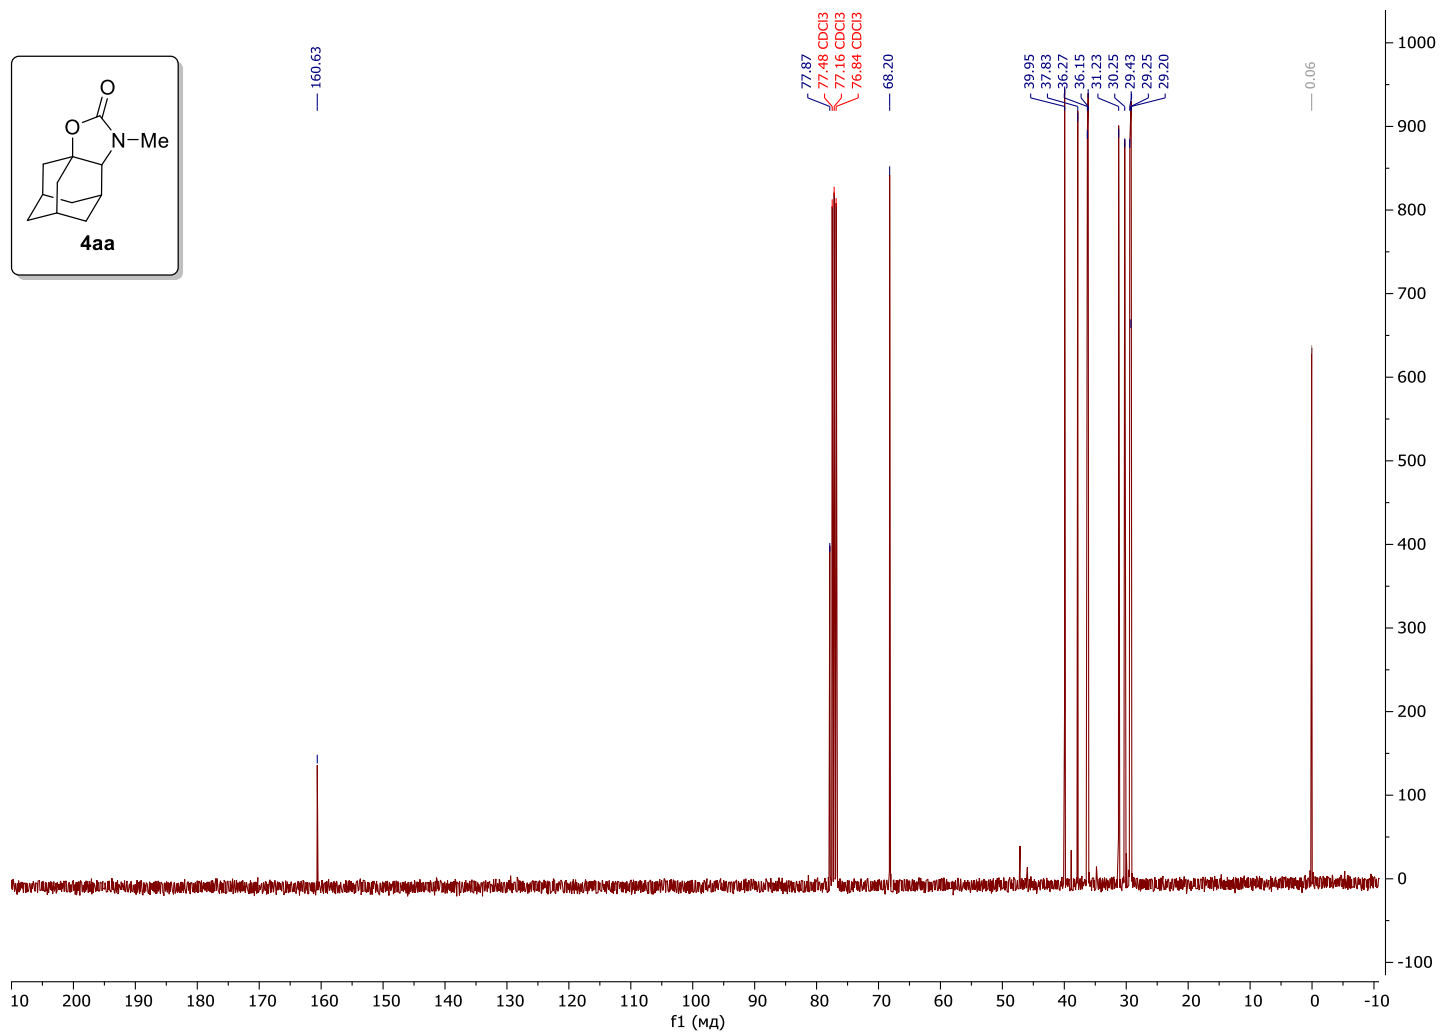

### Compound 4ab

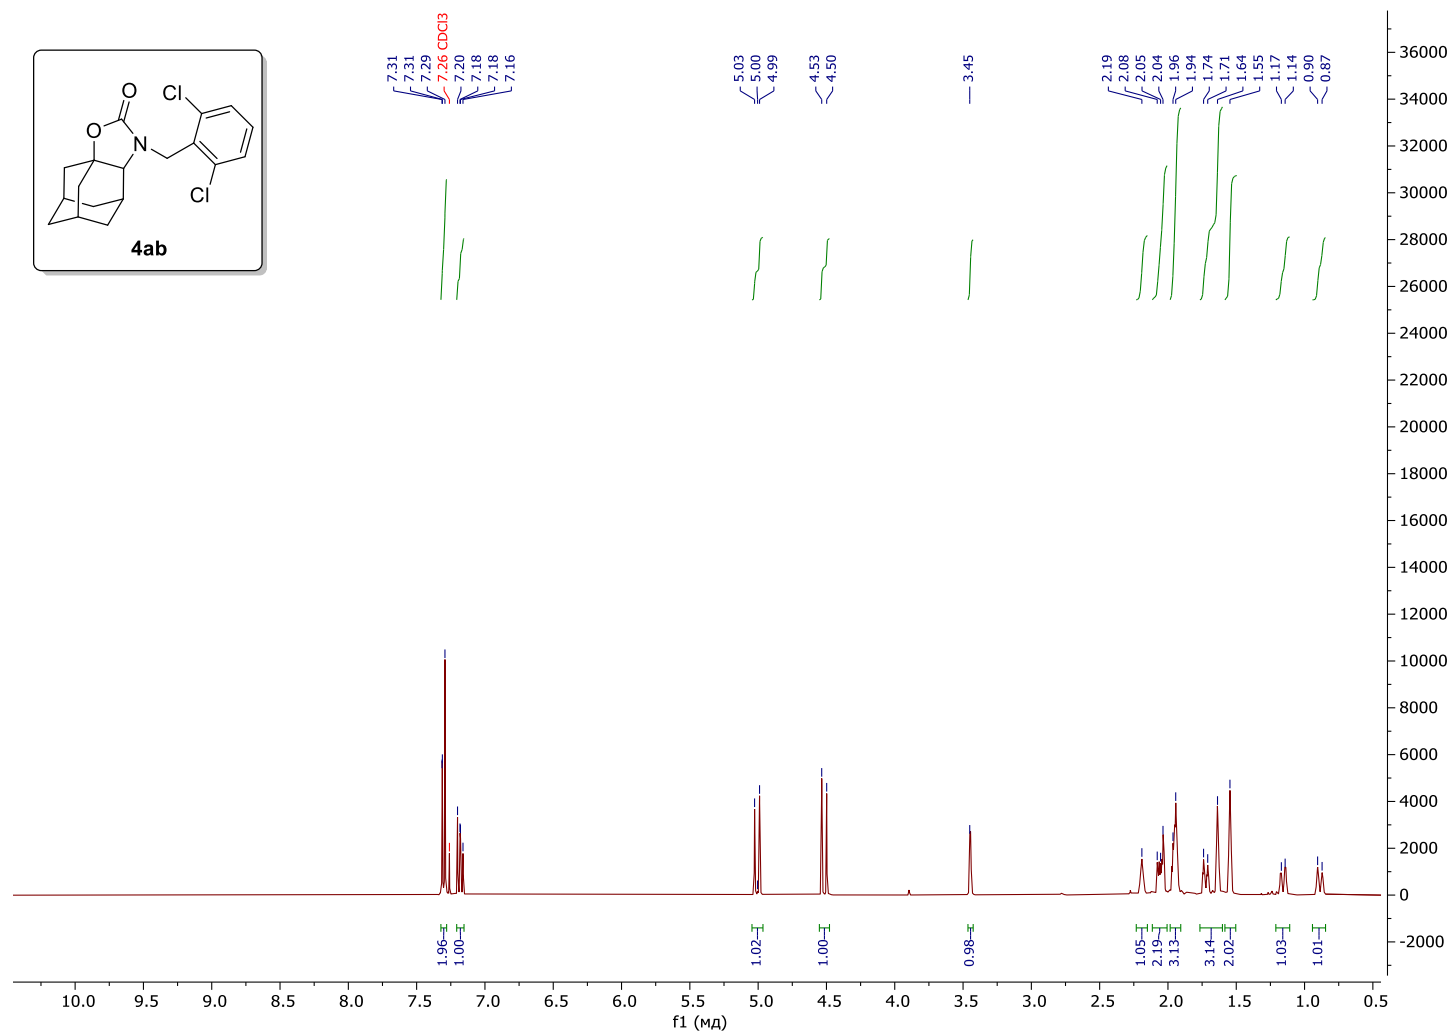

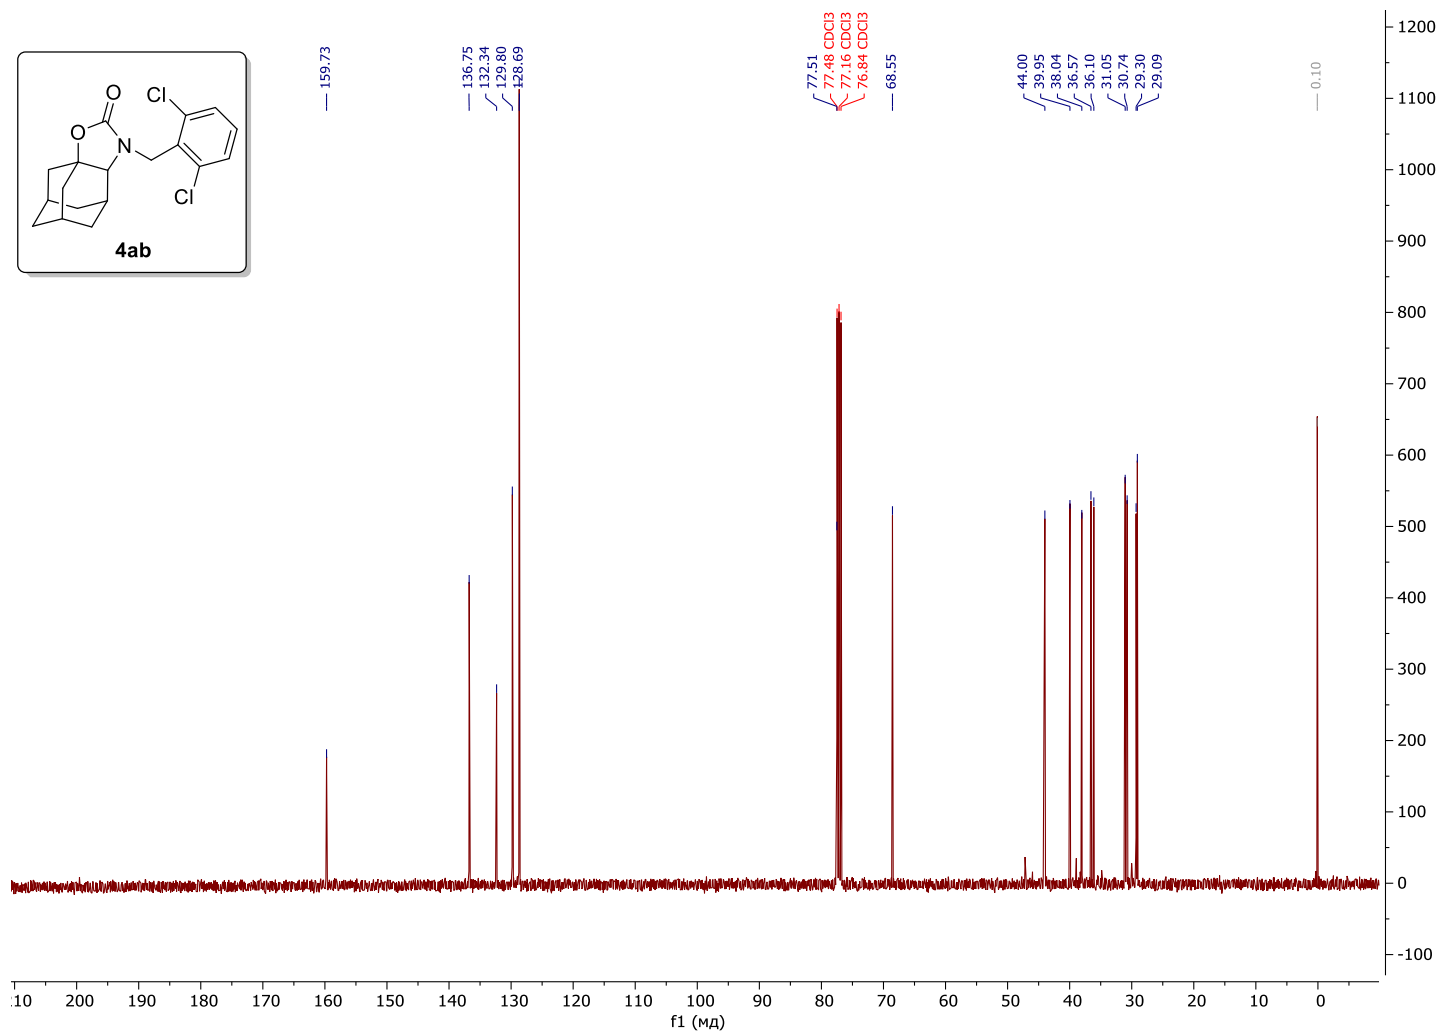

# Compound 4bb

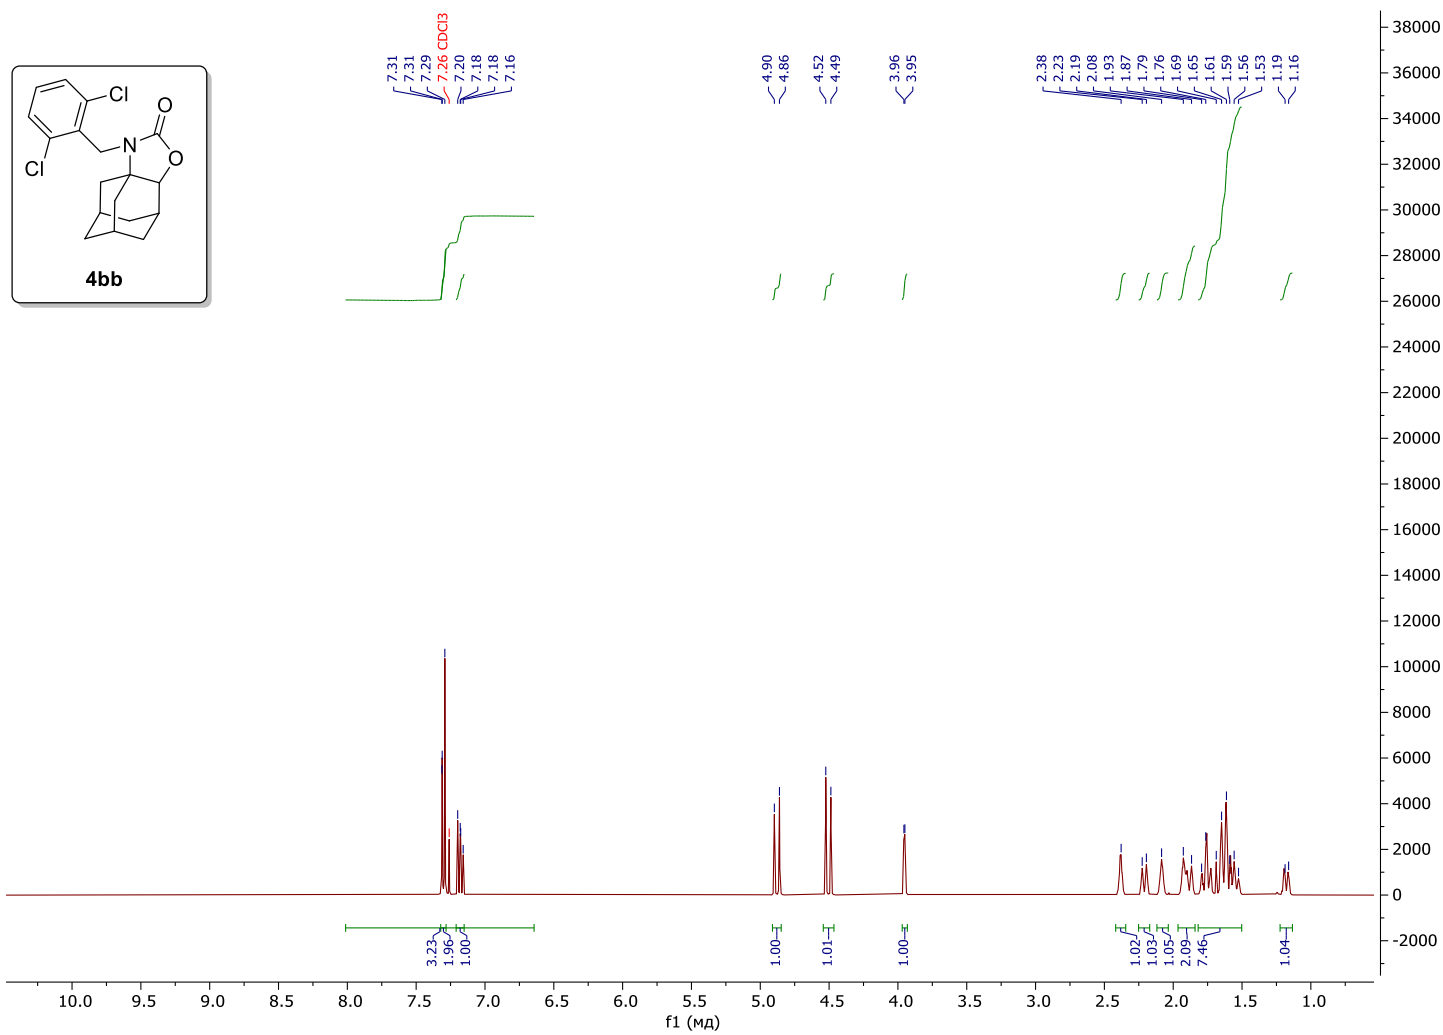

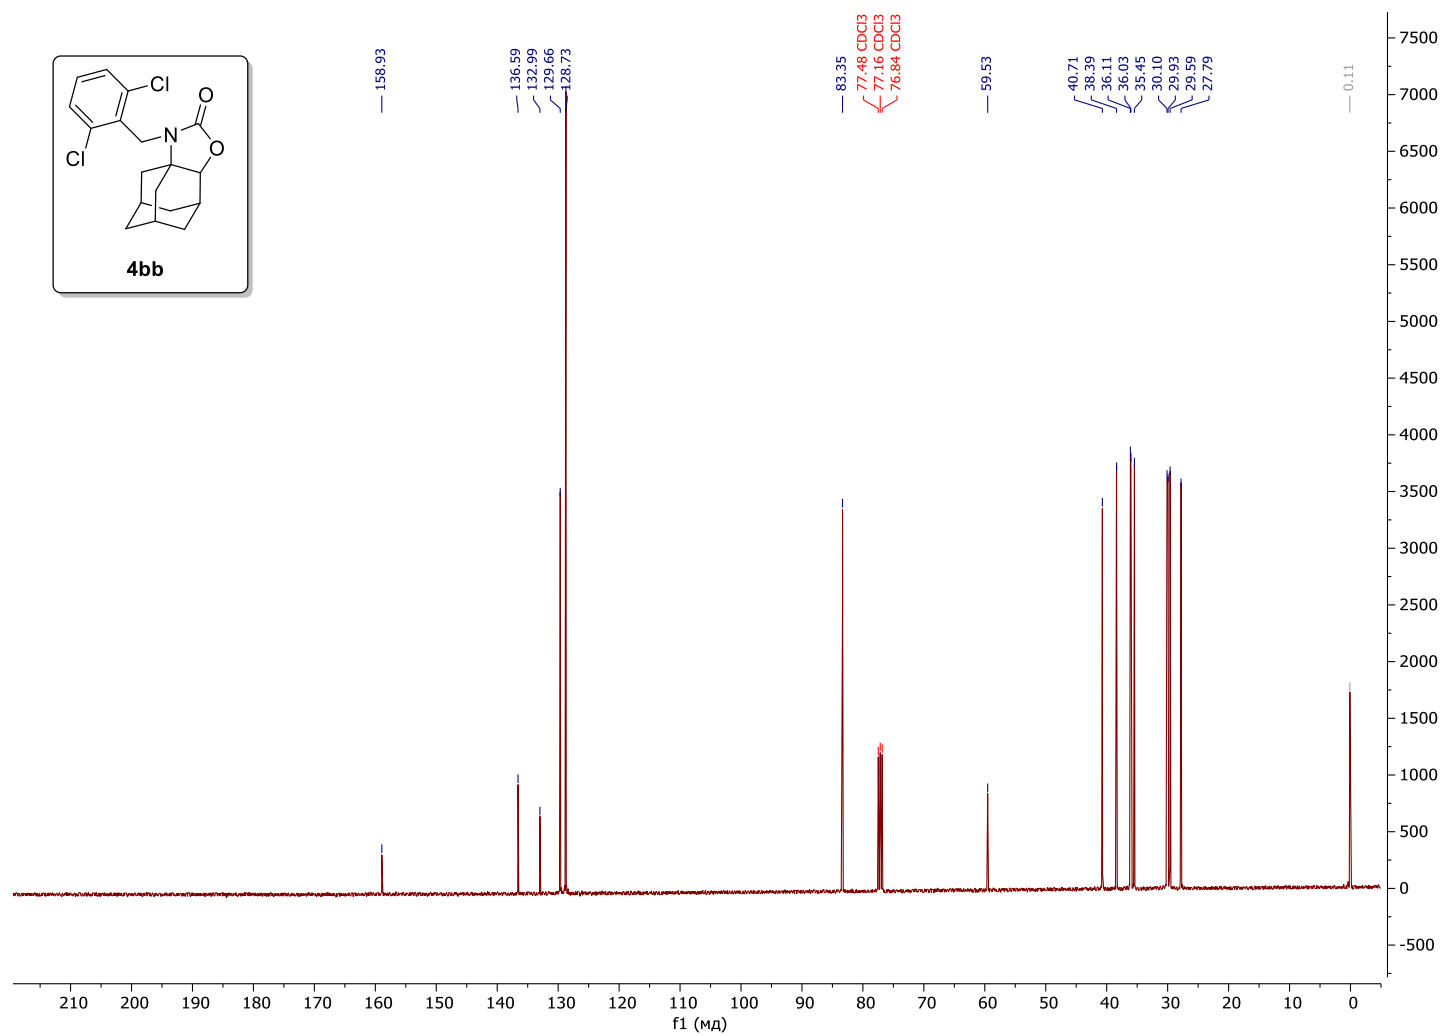



# Compound 4cb

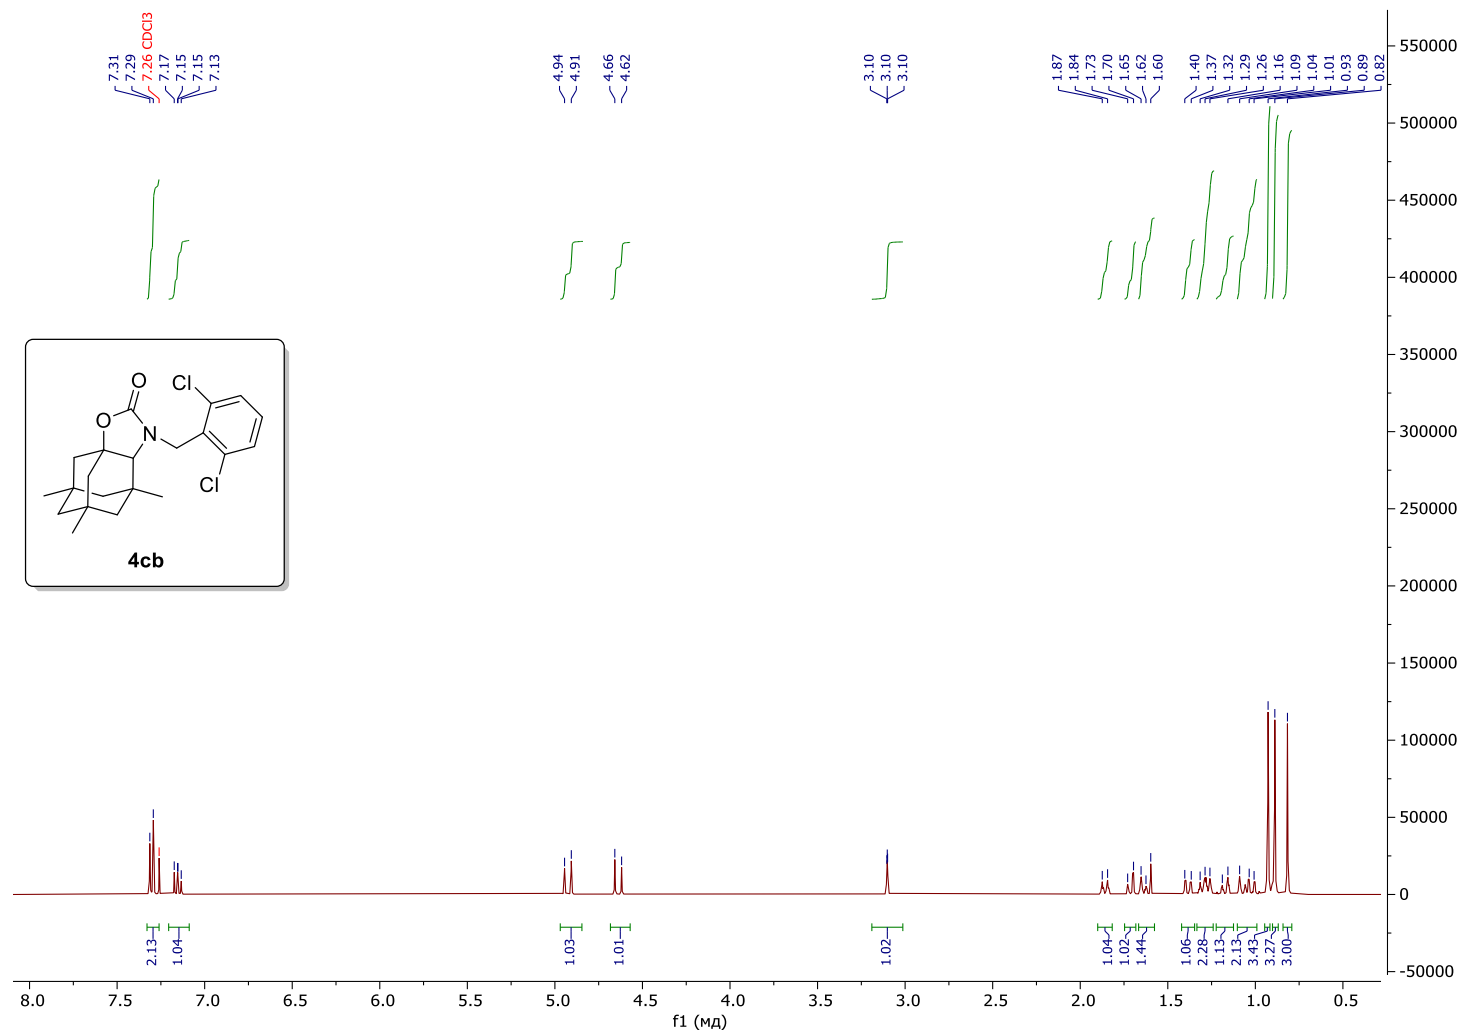

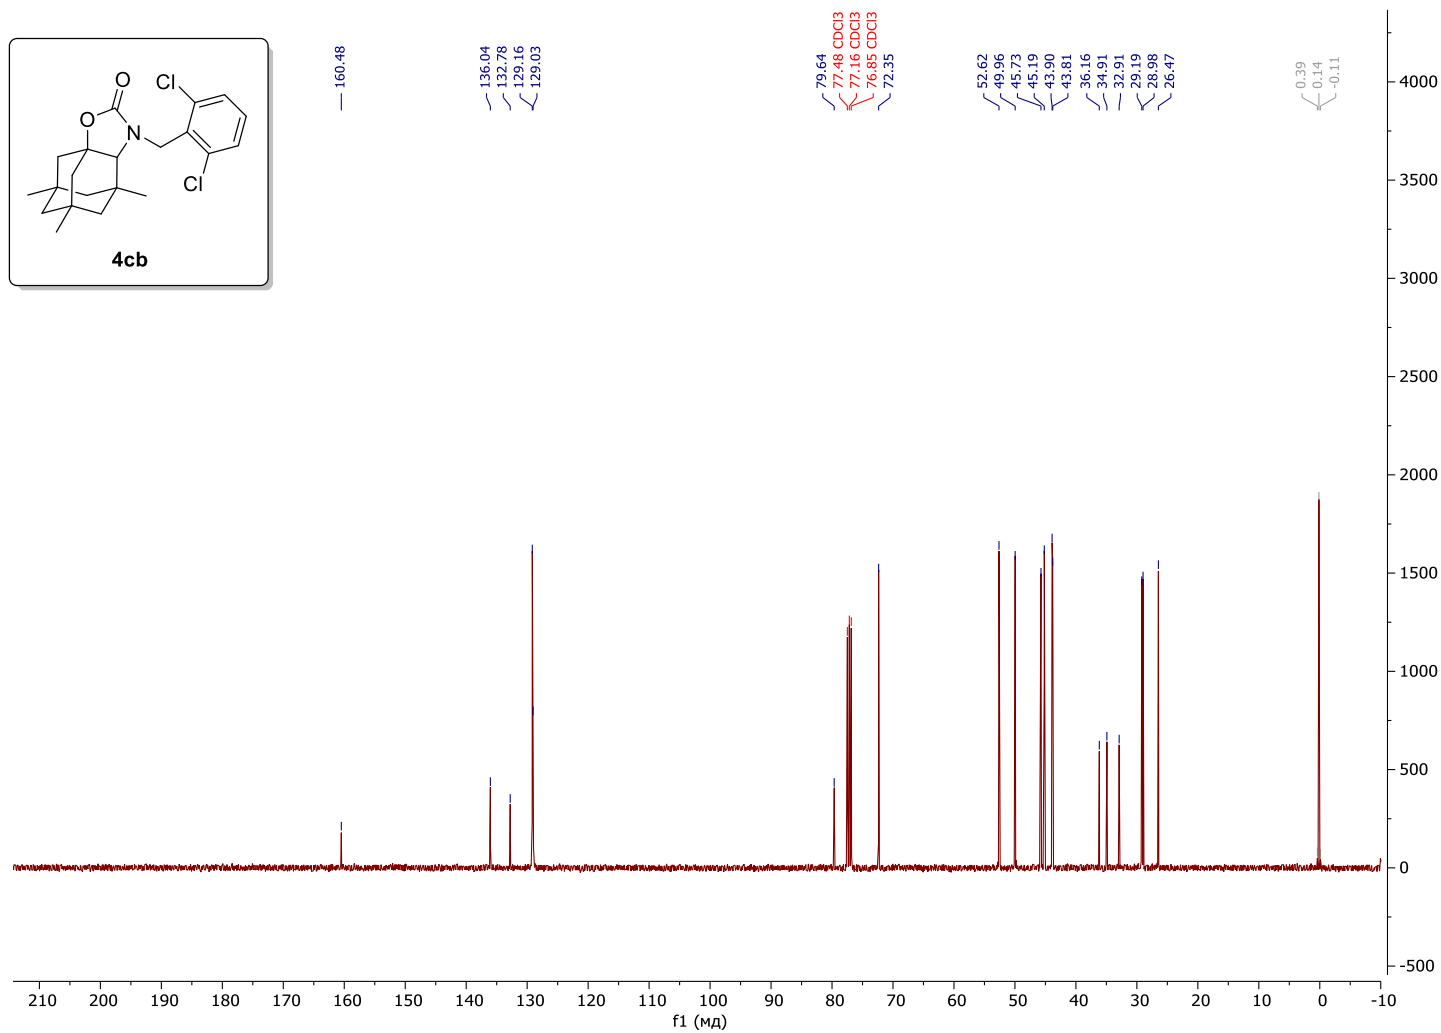

# Compound 4db

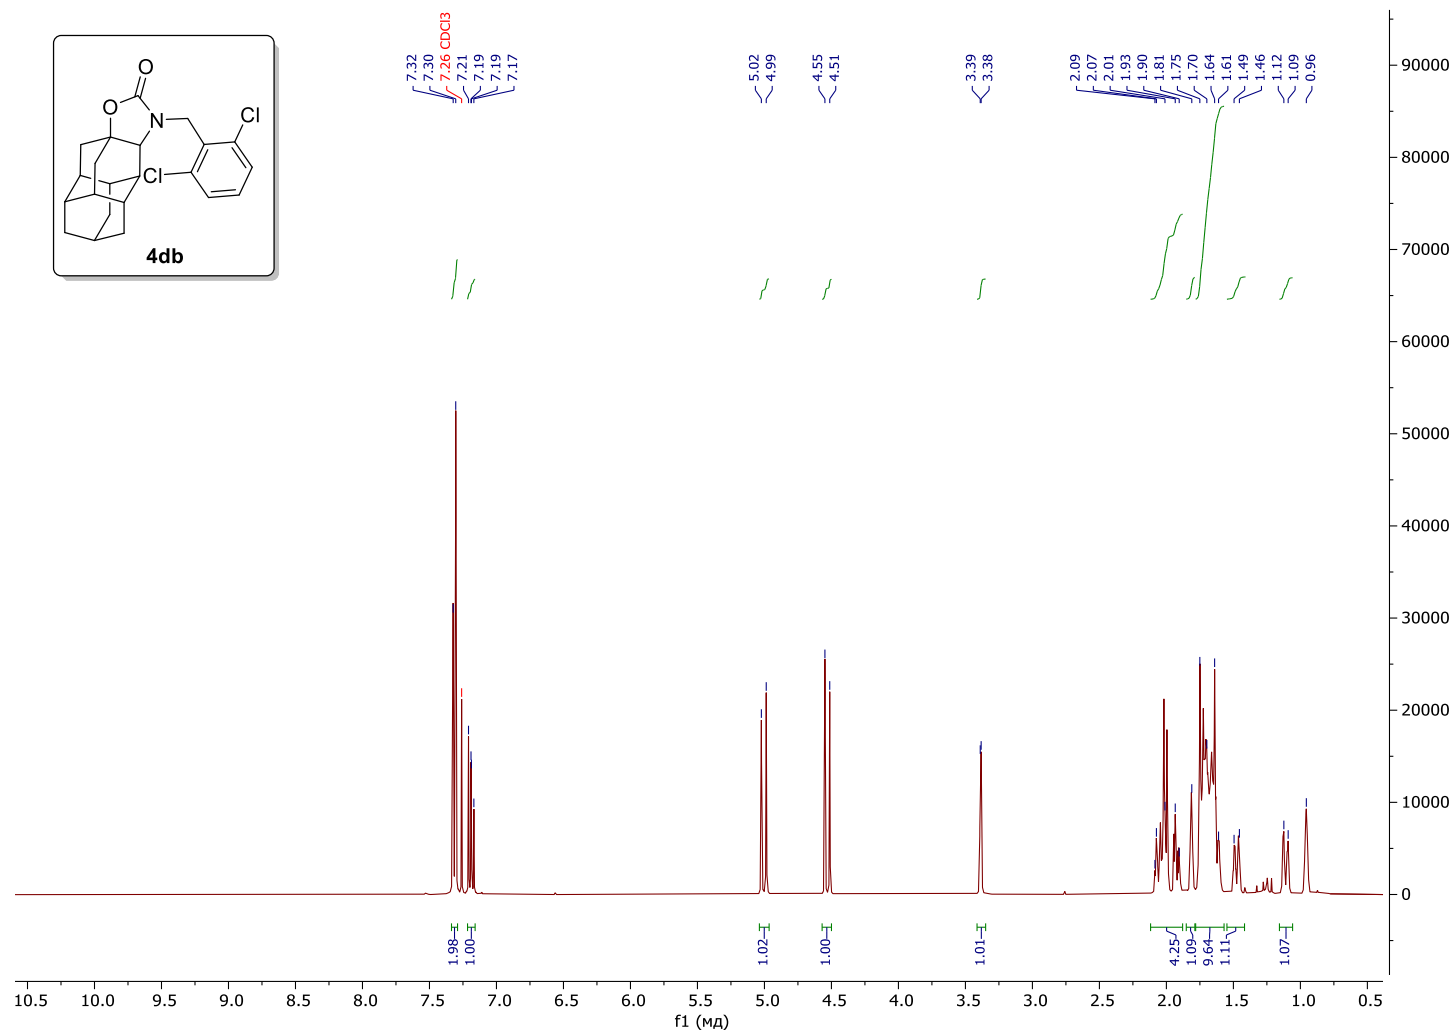

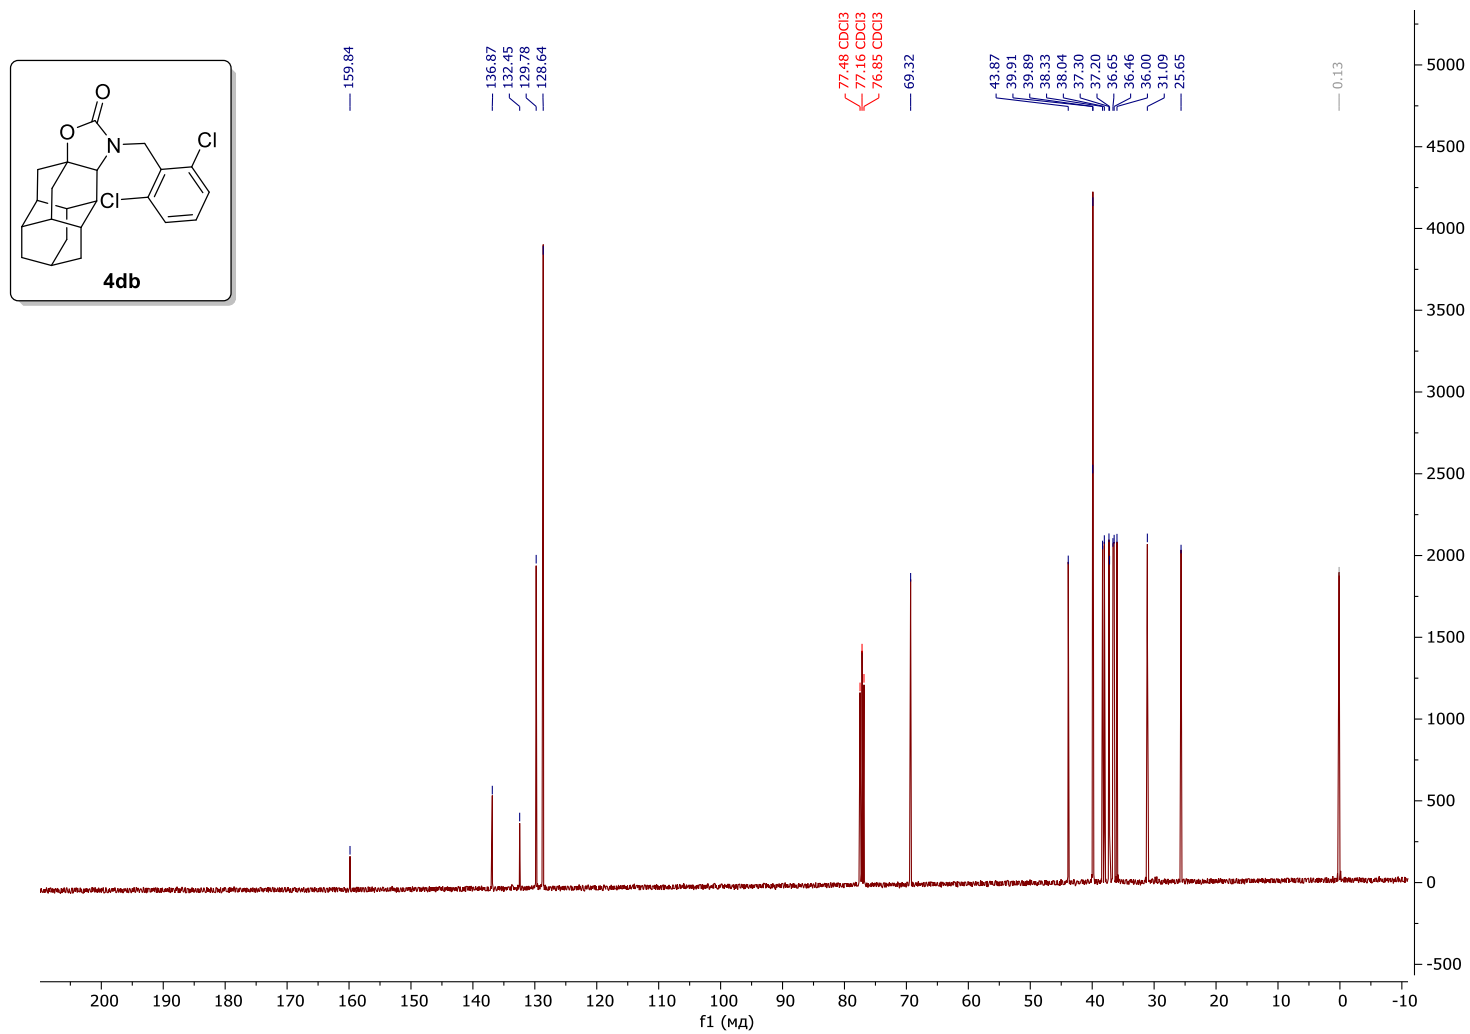

# Compound 4ea

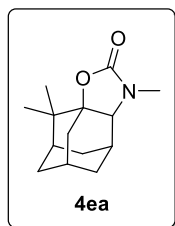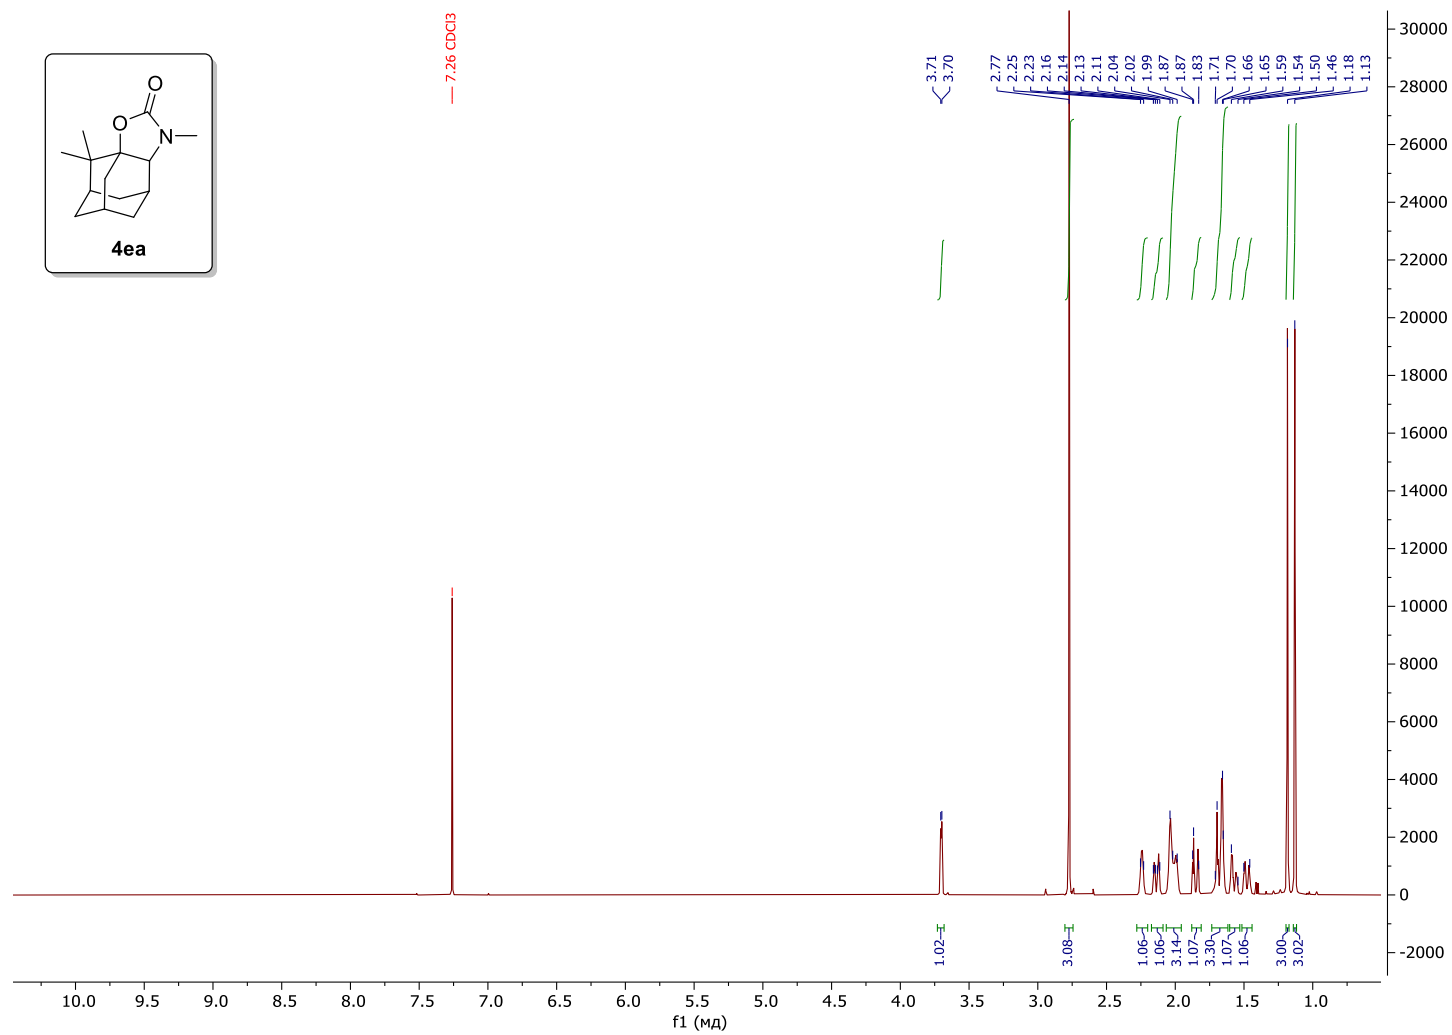

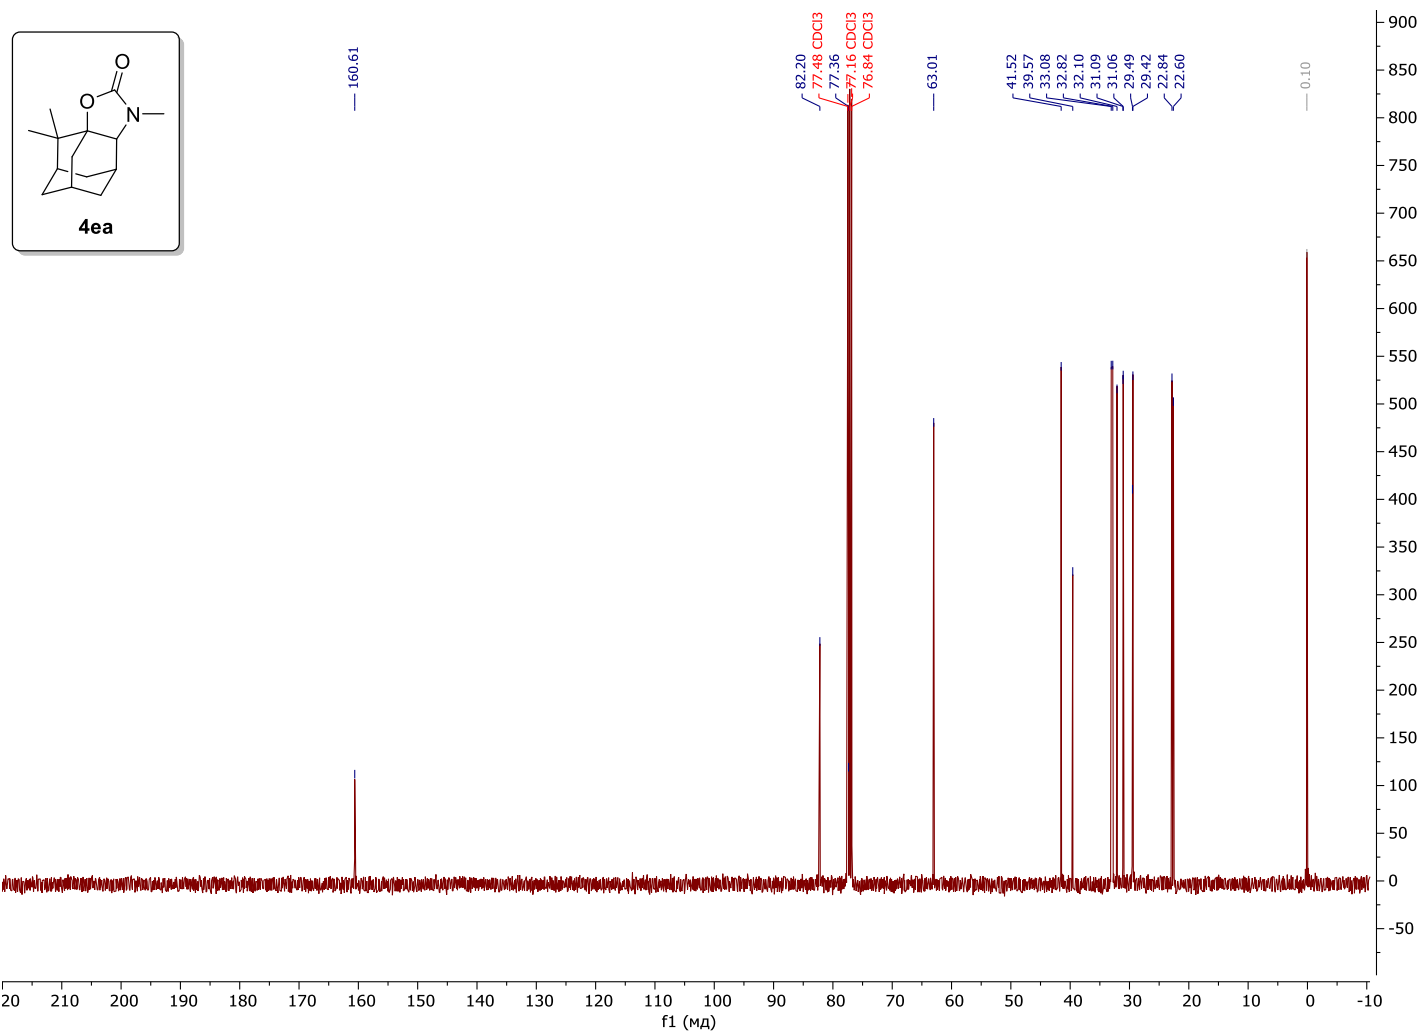

# Compound 4eb

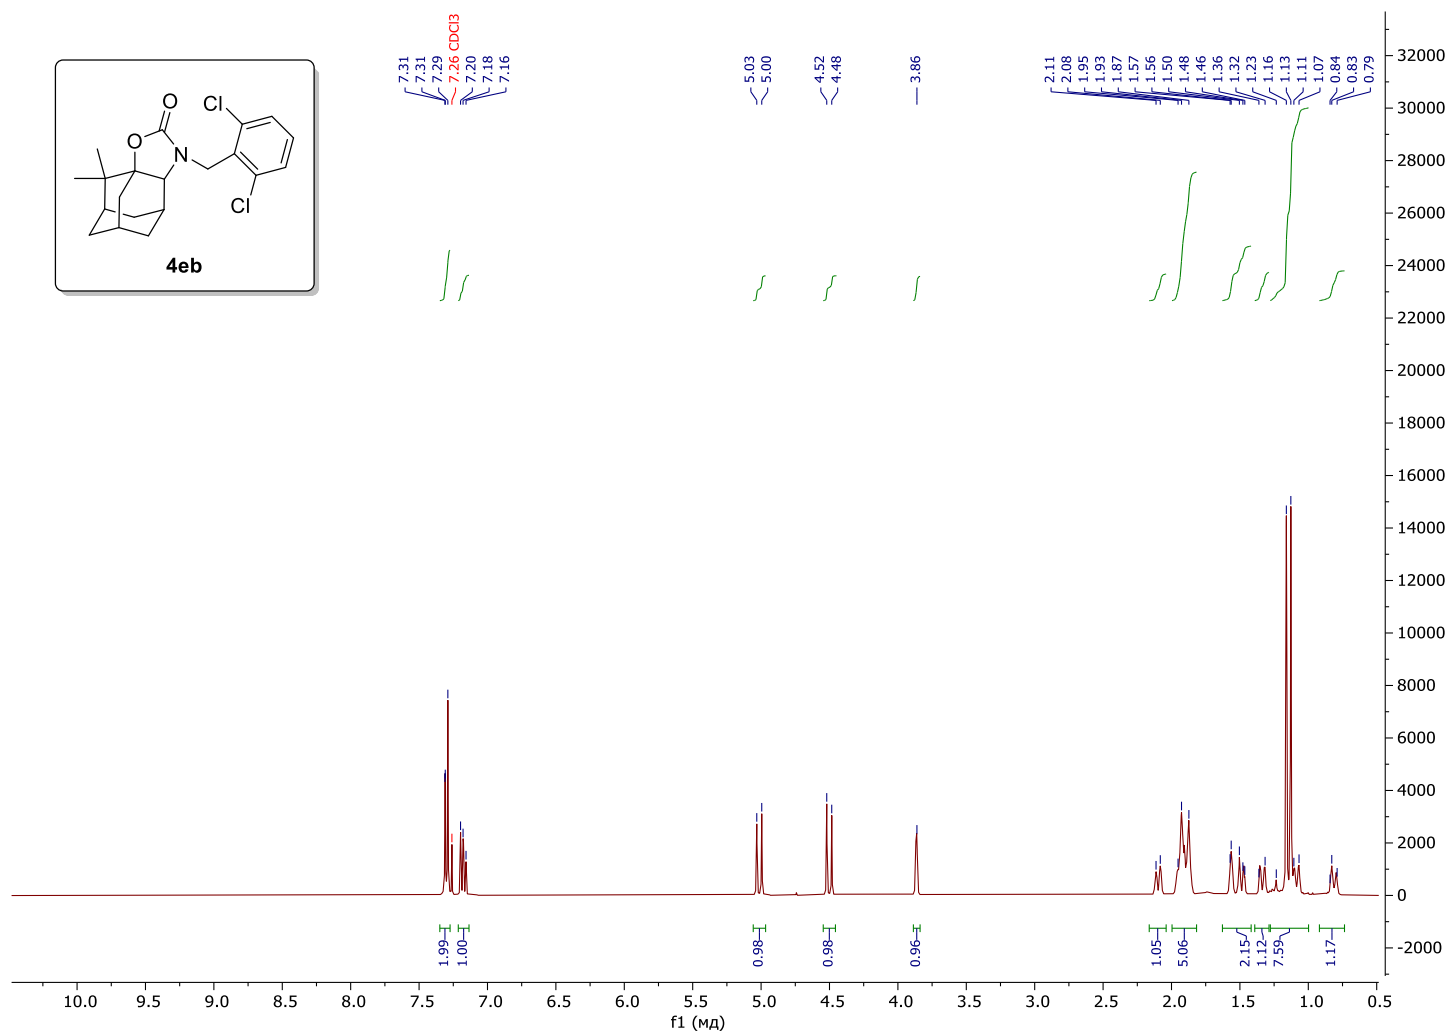

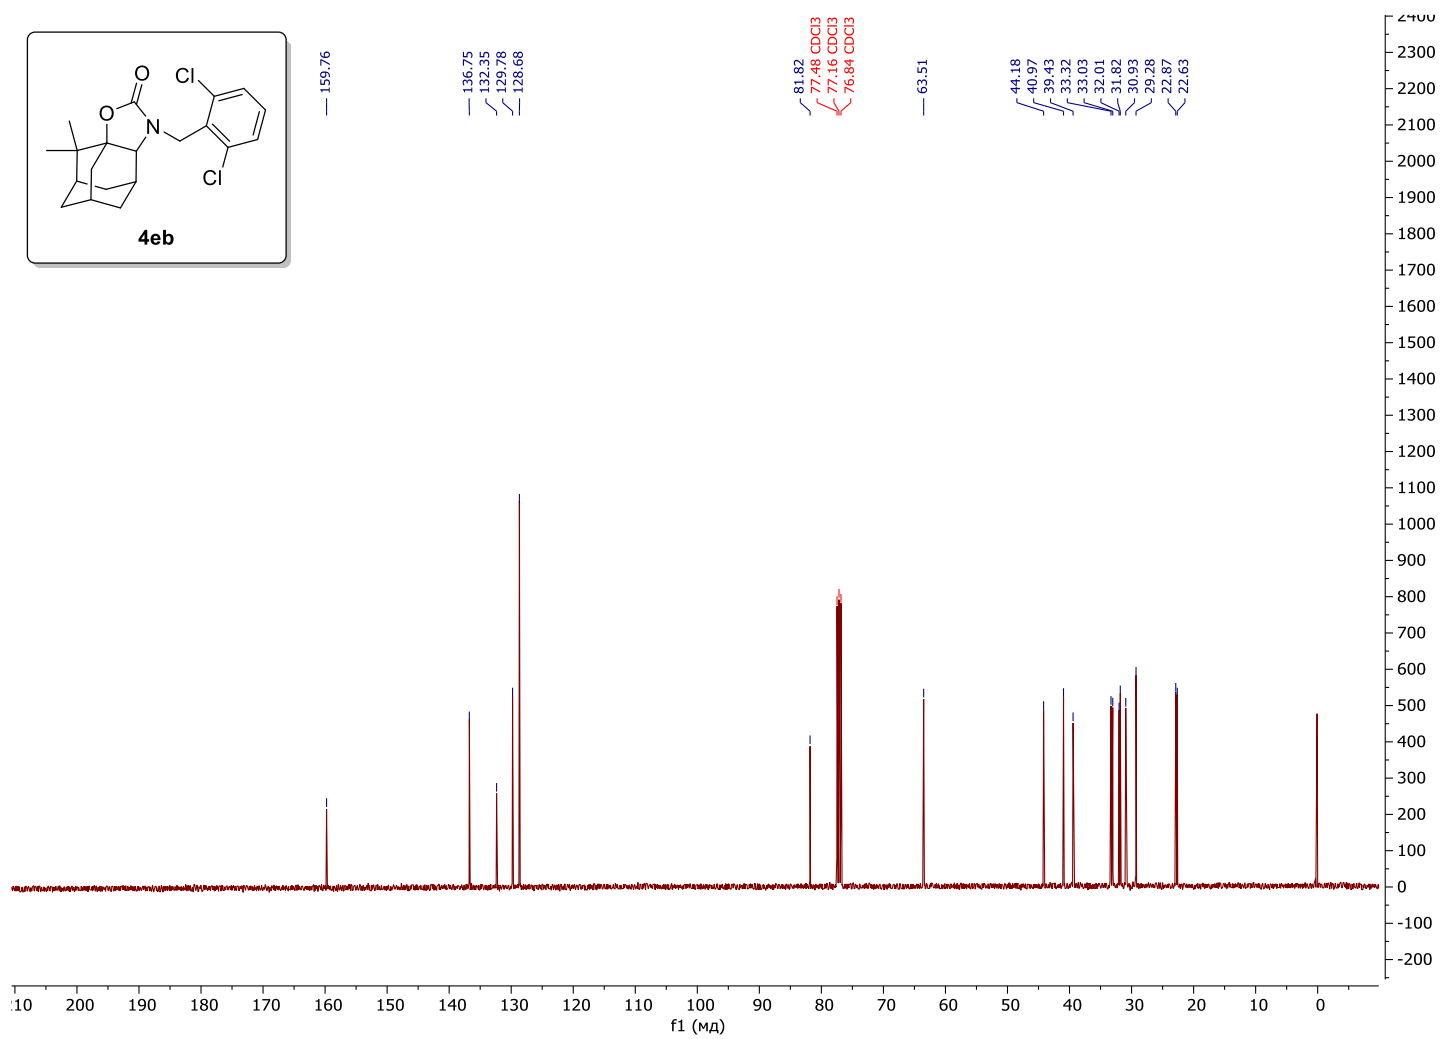



# Compound 5

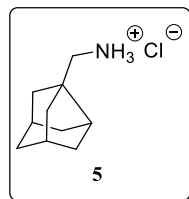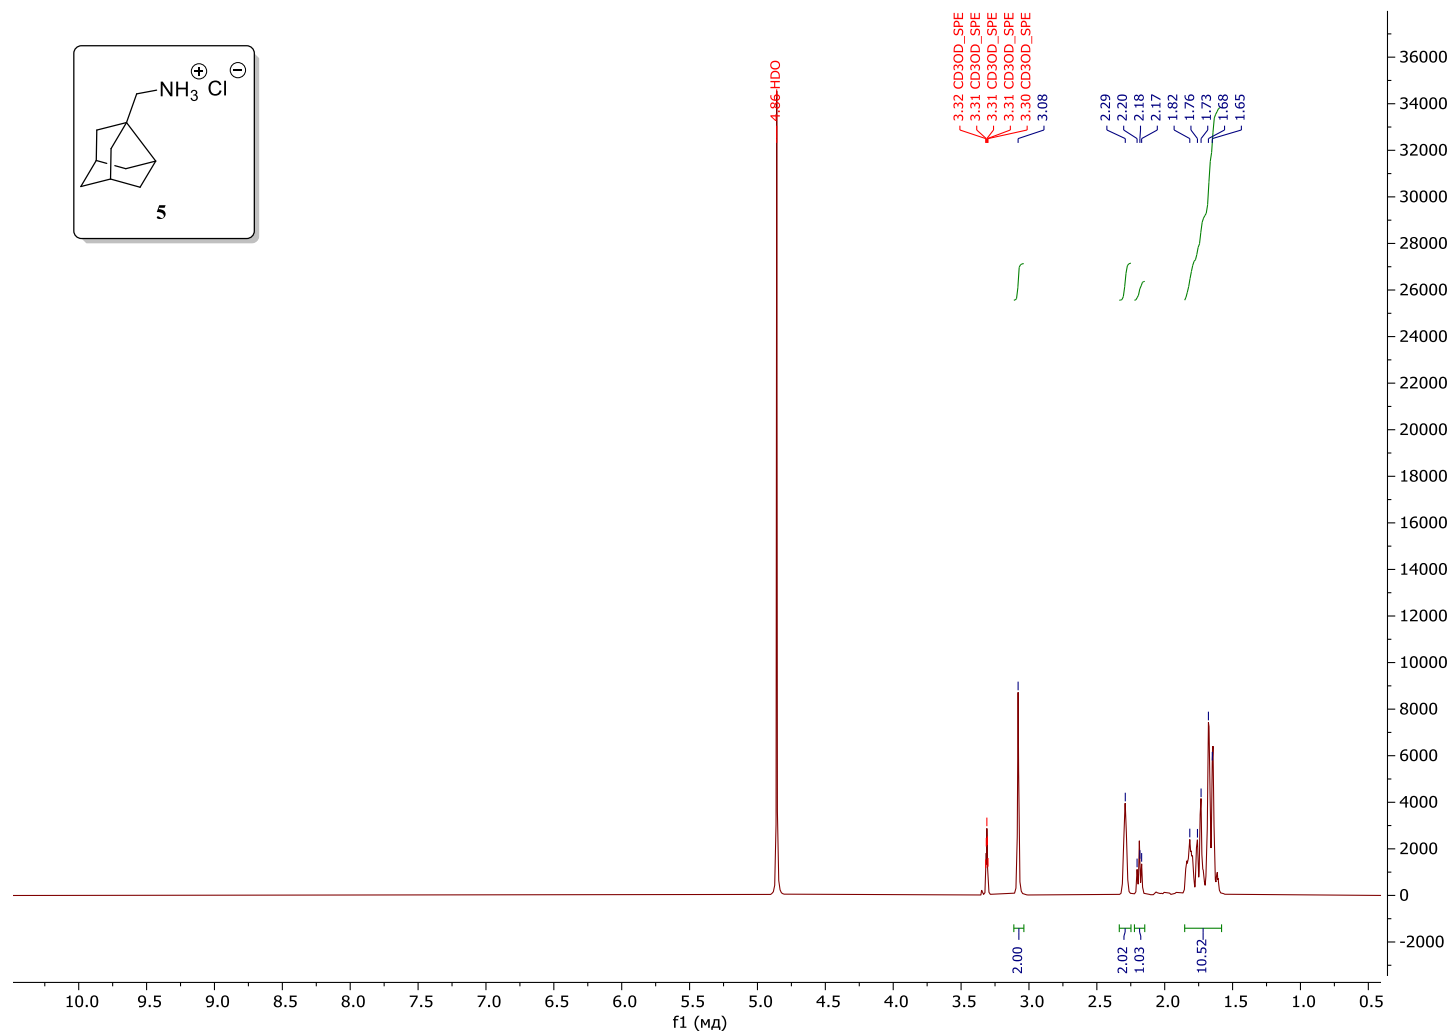

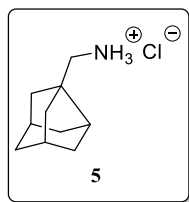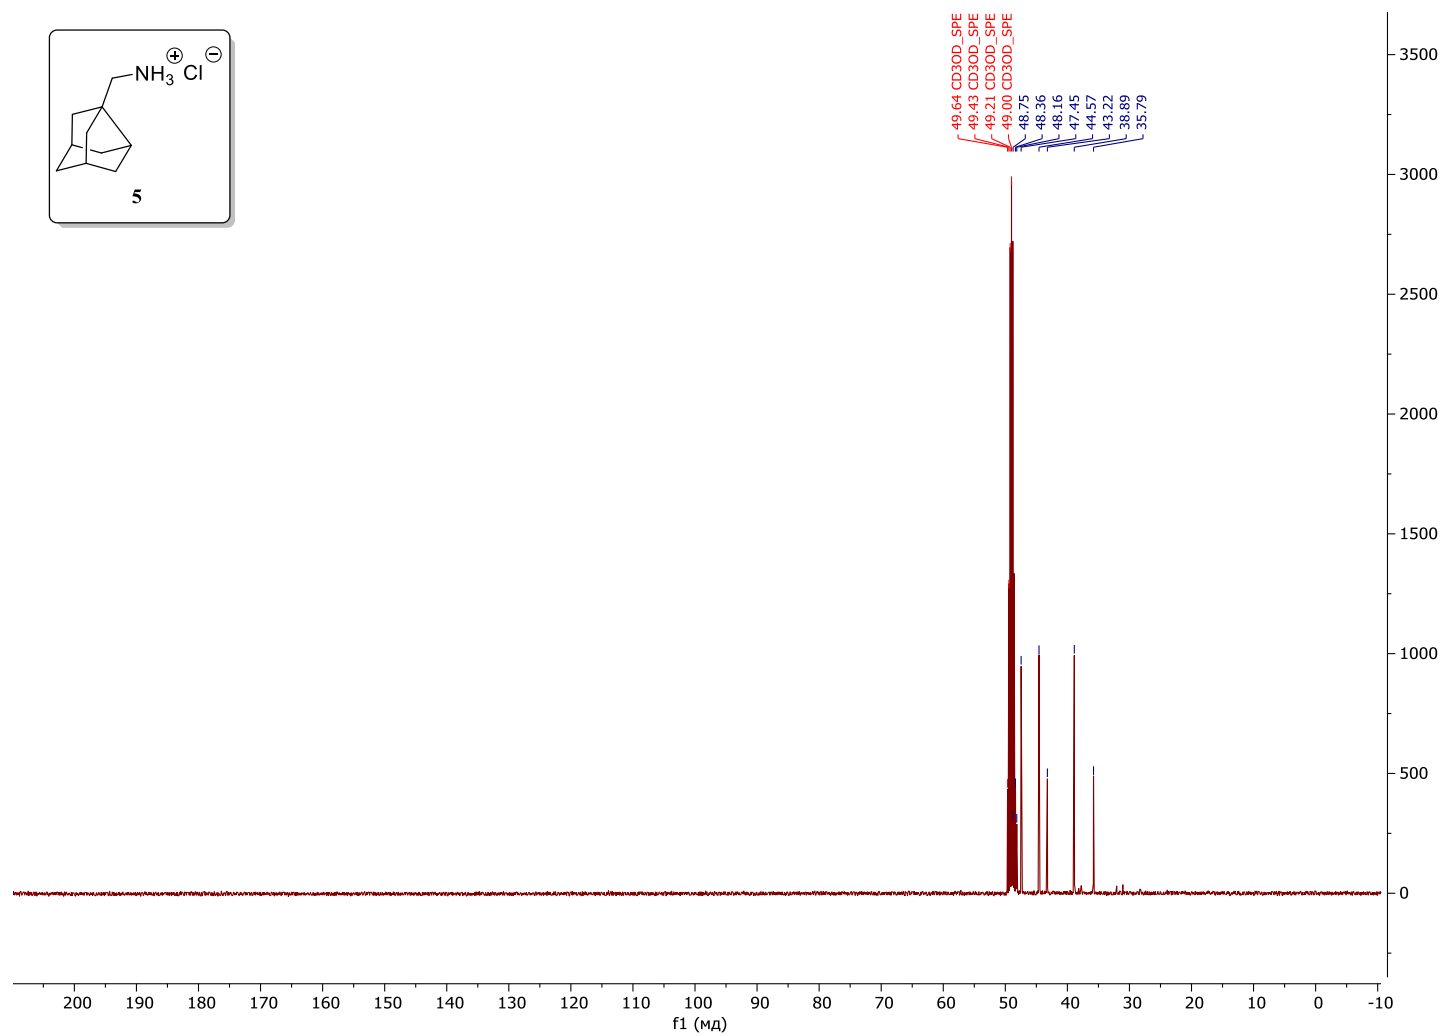

# Compound 6

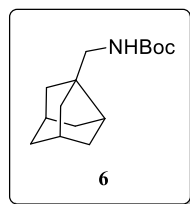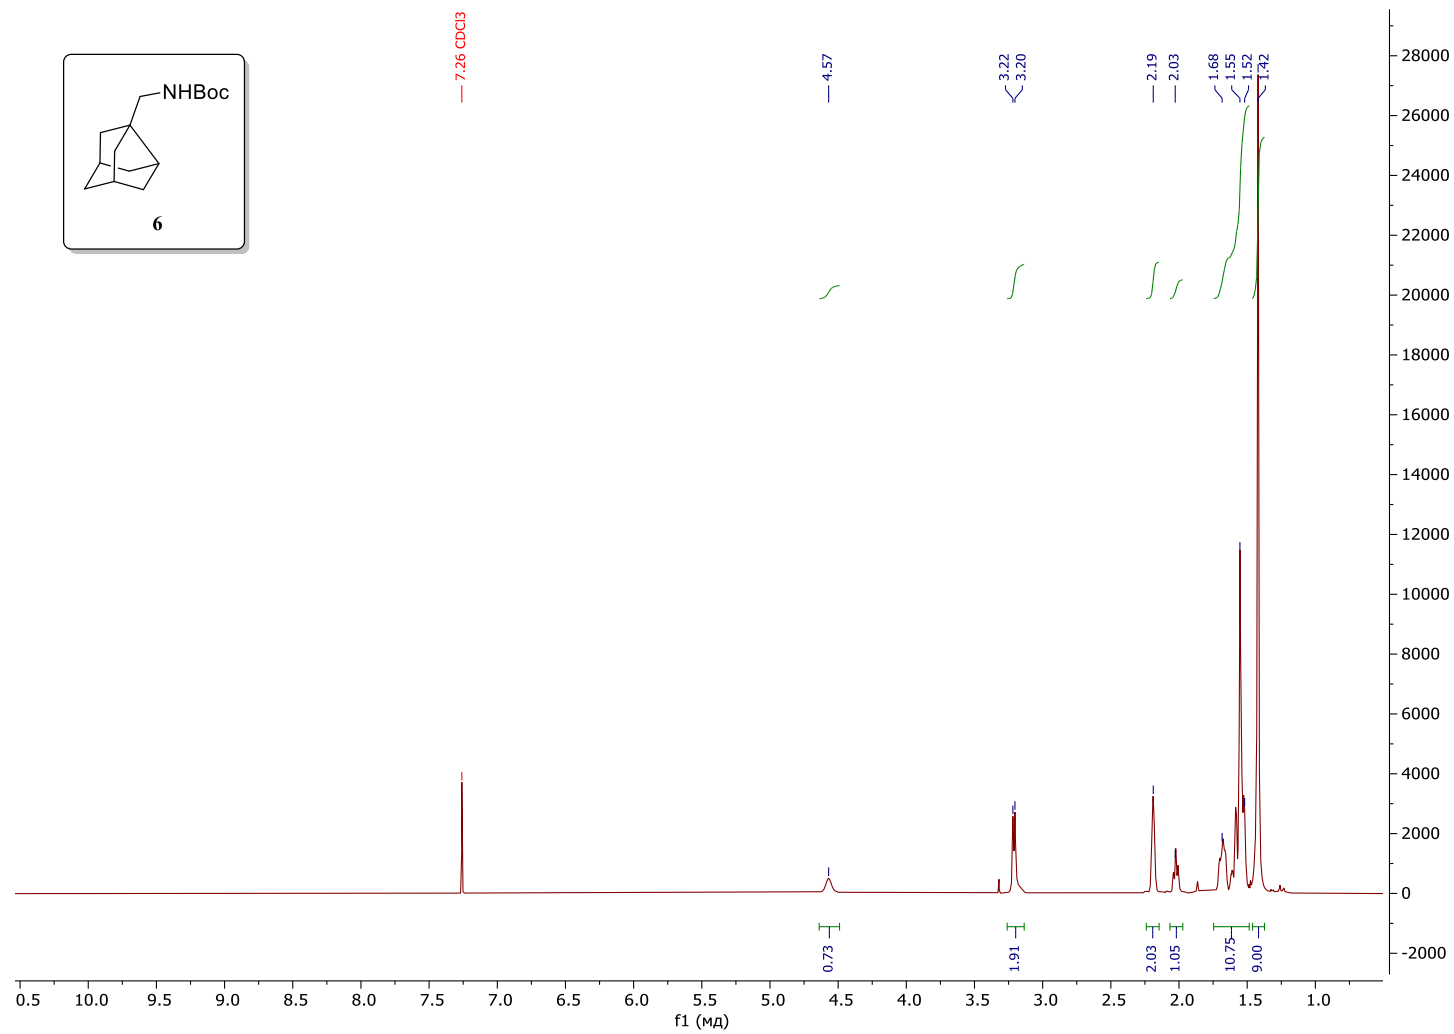

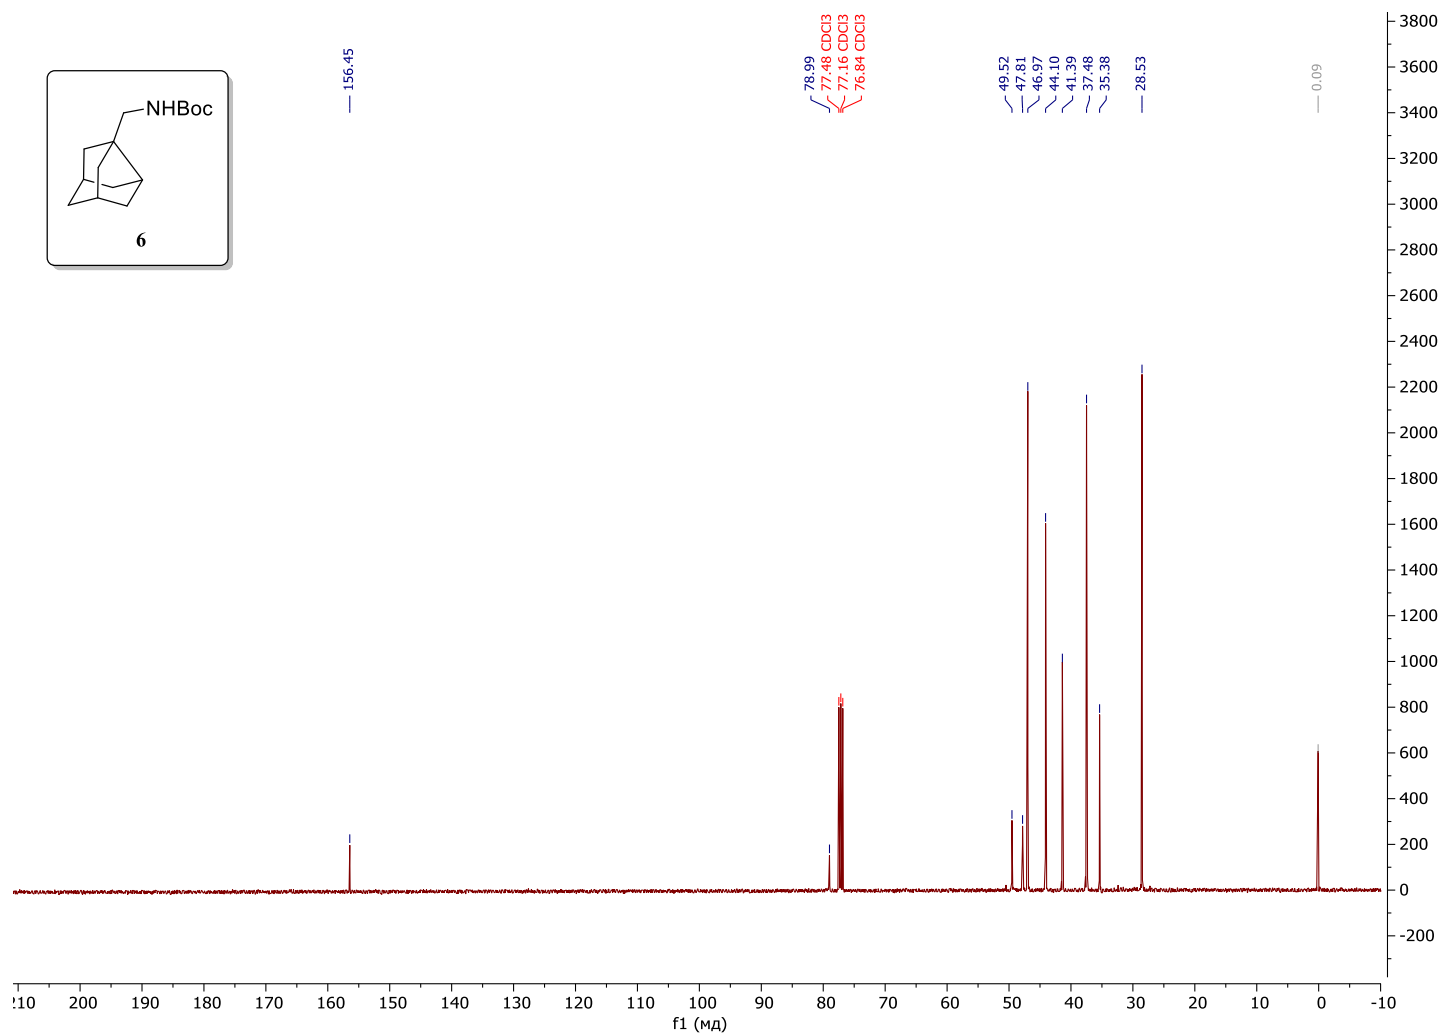

# Compound 7

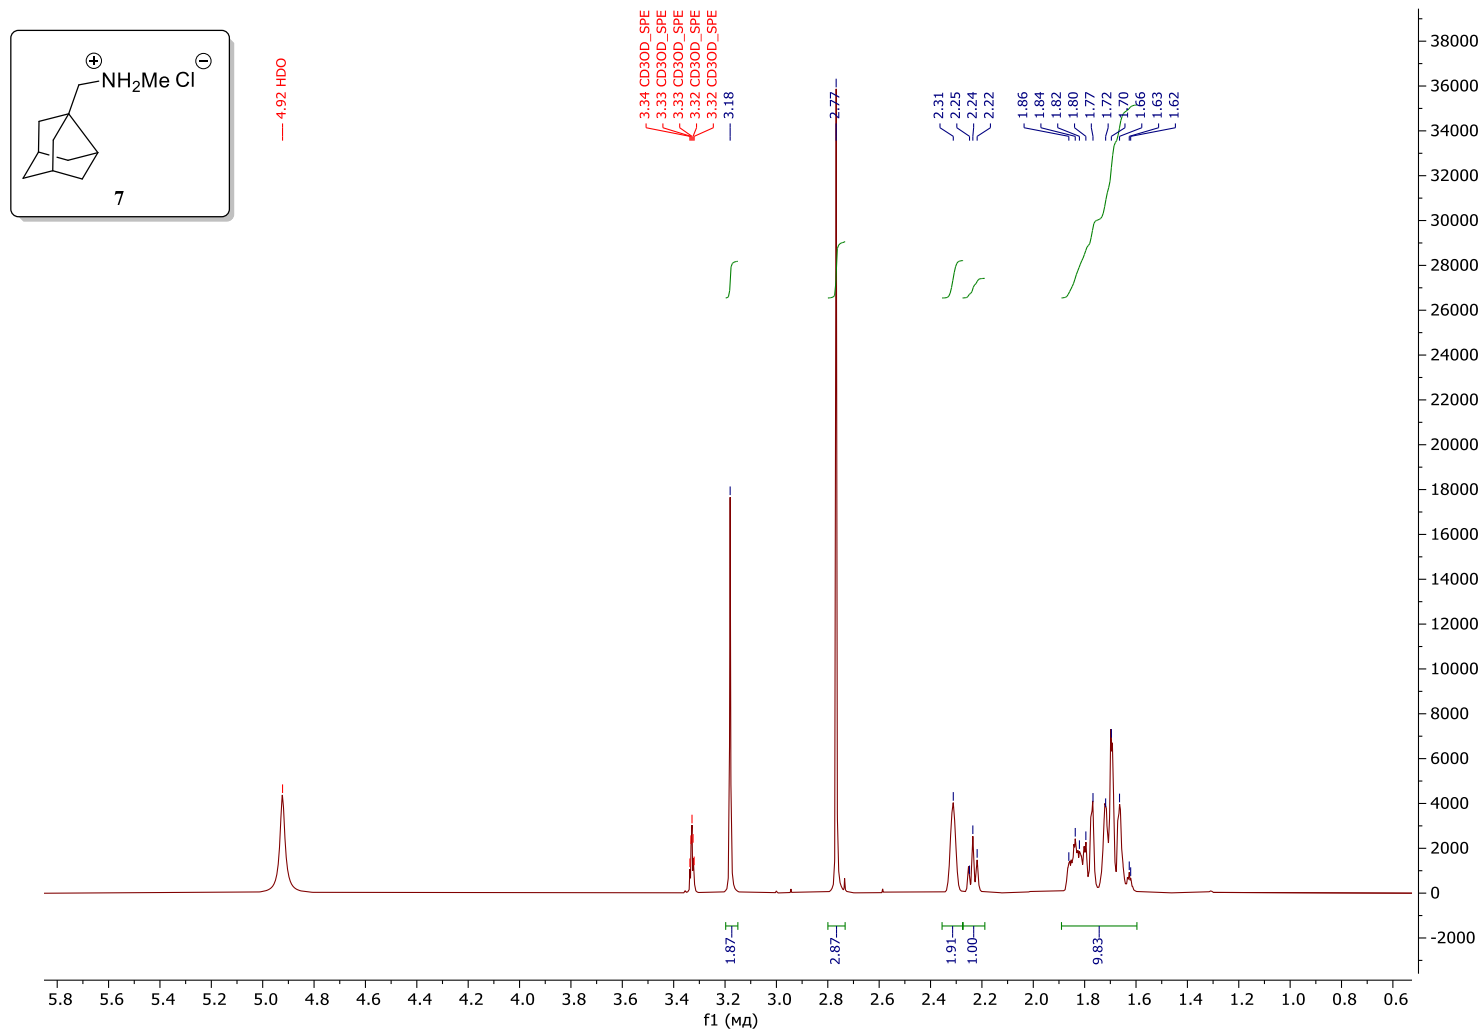

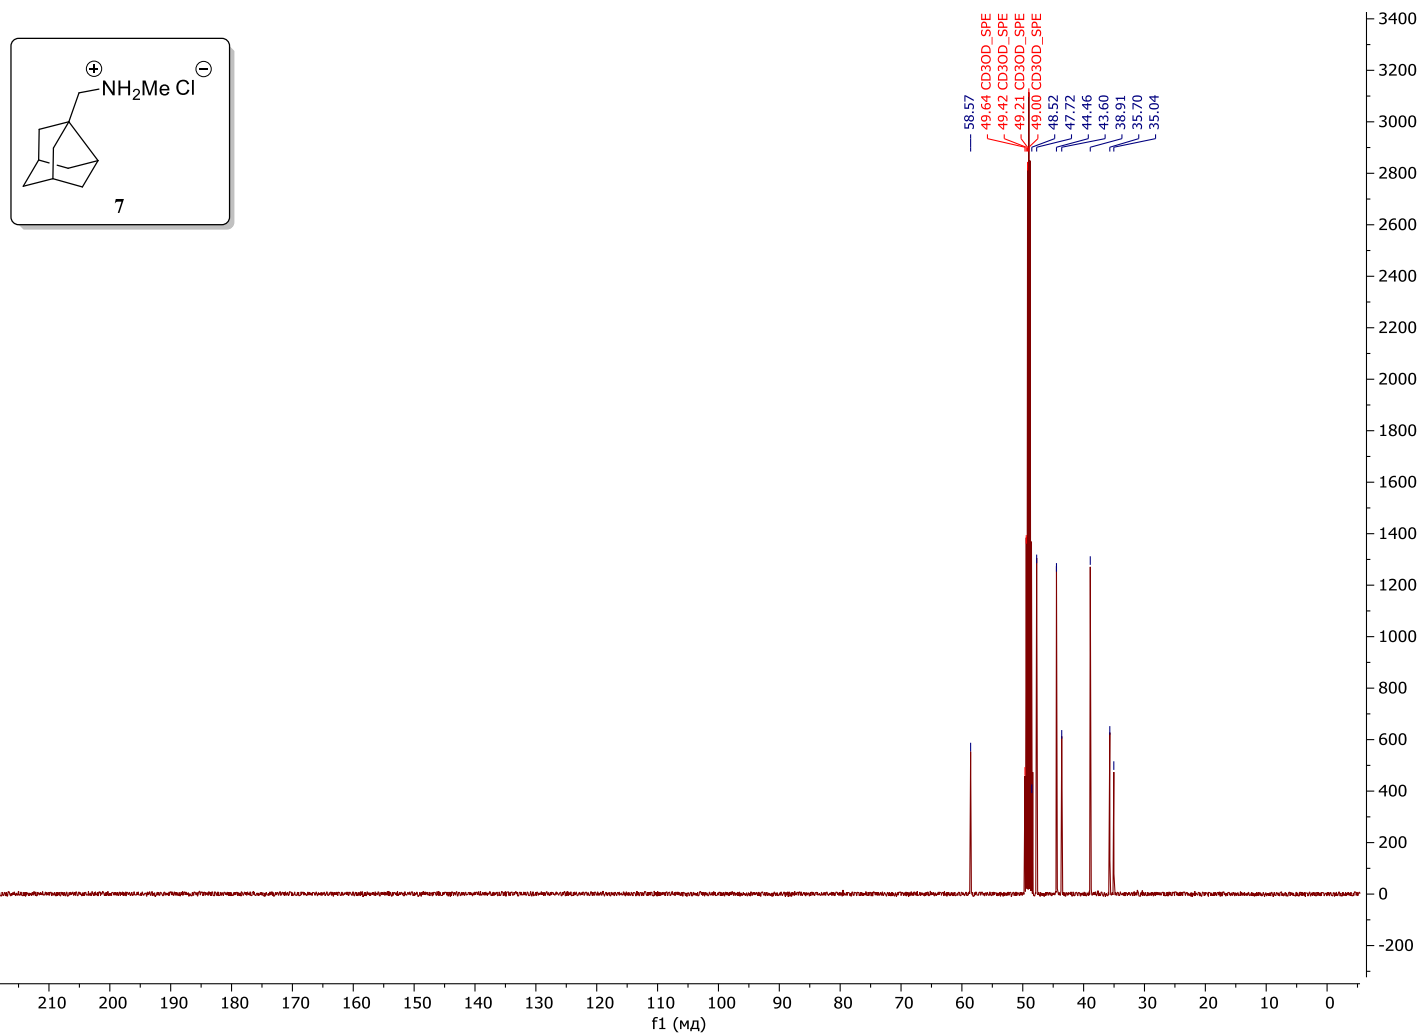

# Compound 8

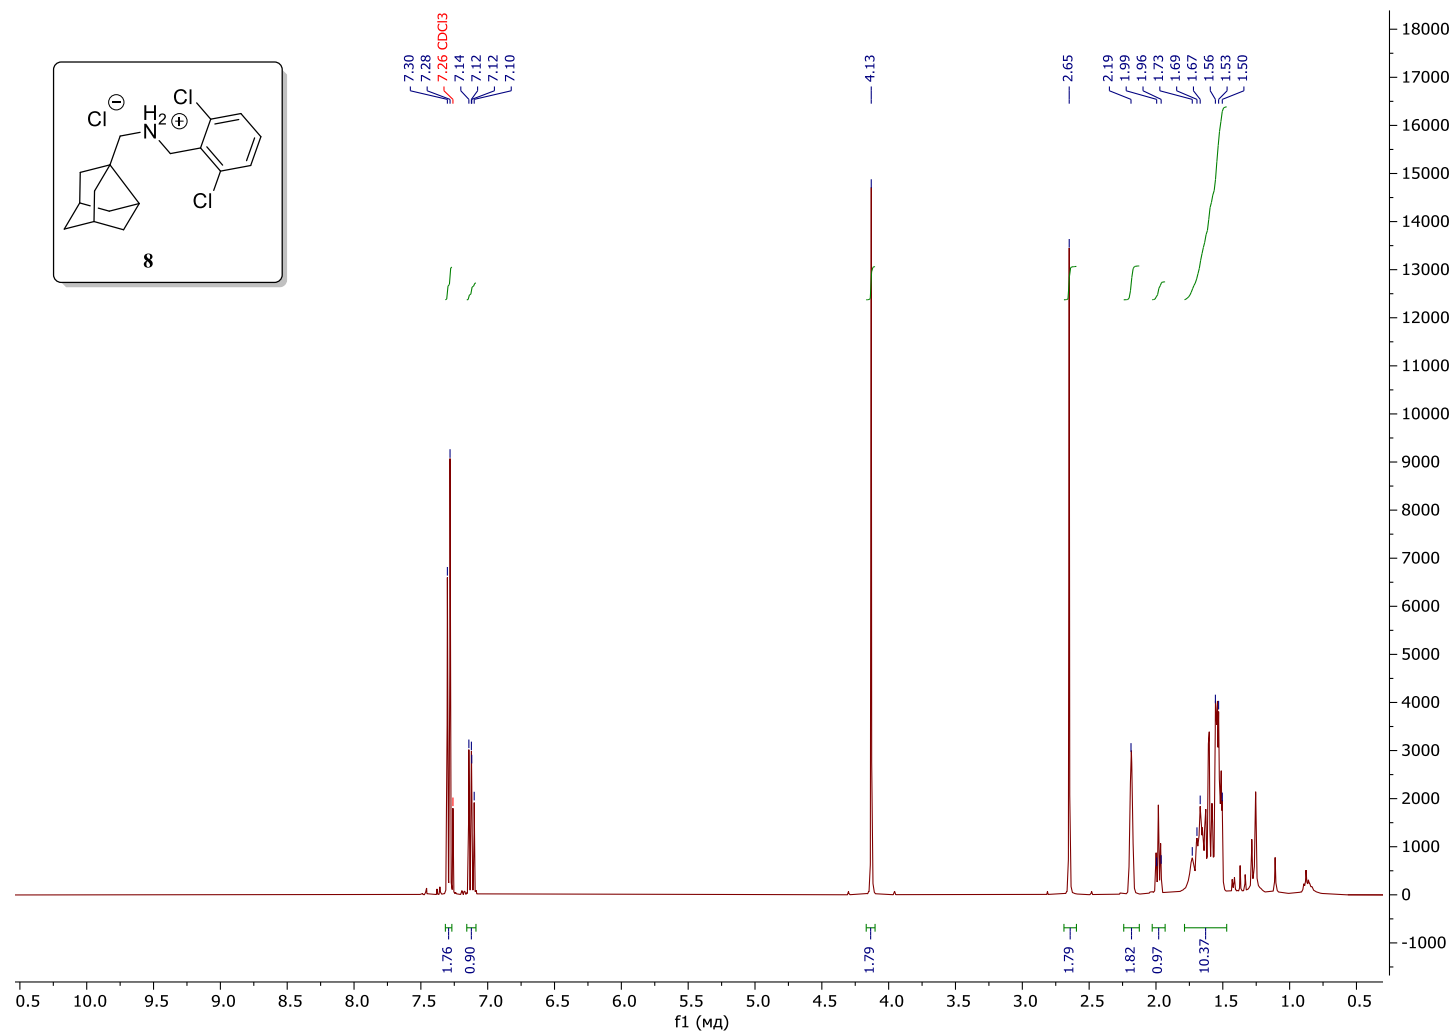

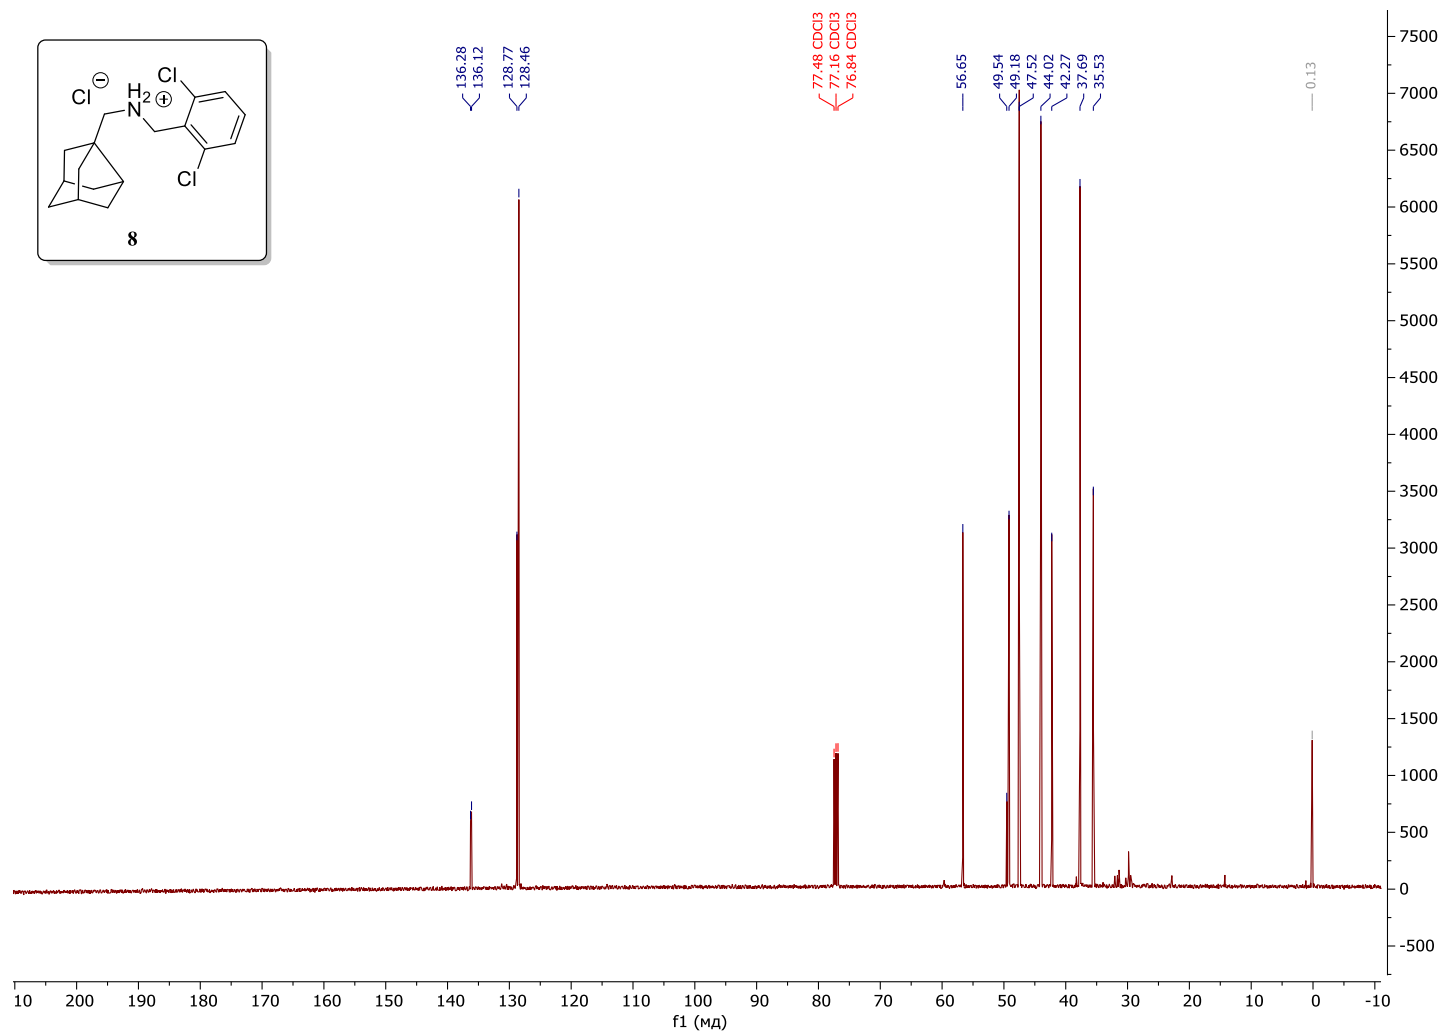



# Compound 9 (both isomers)

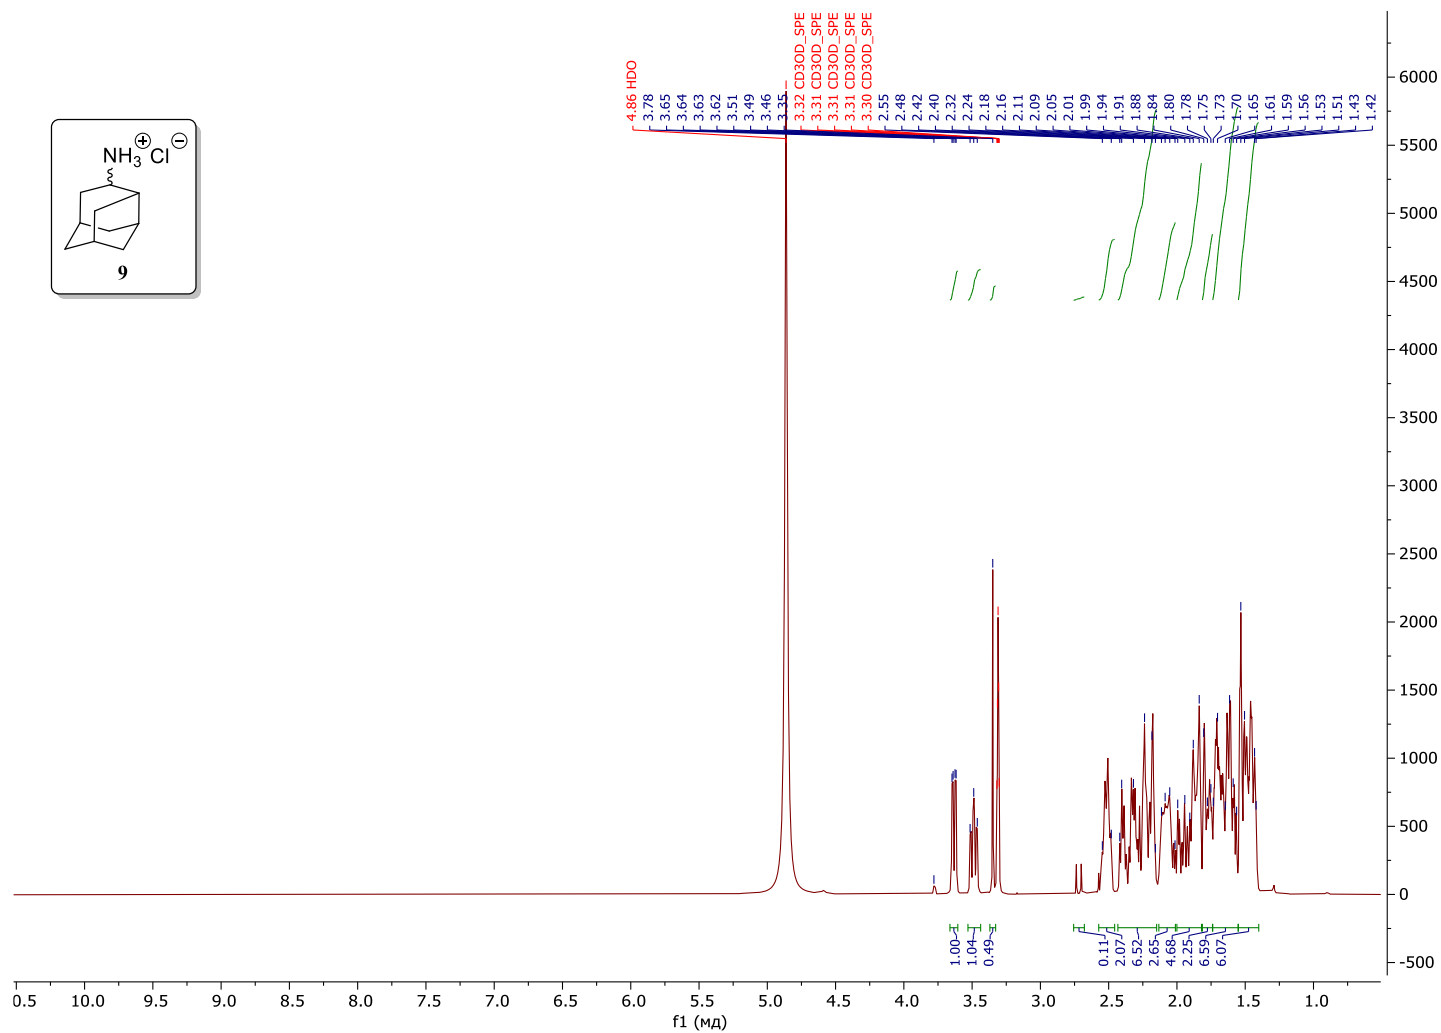

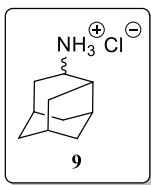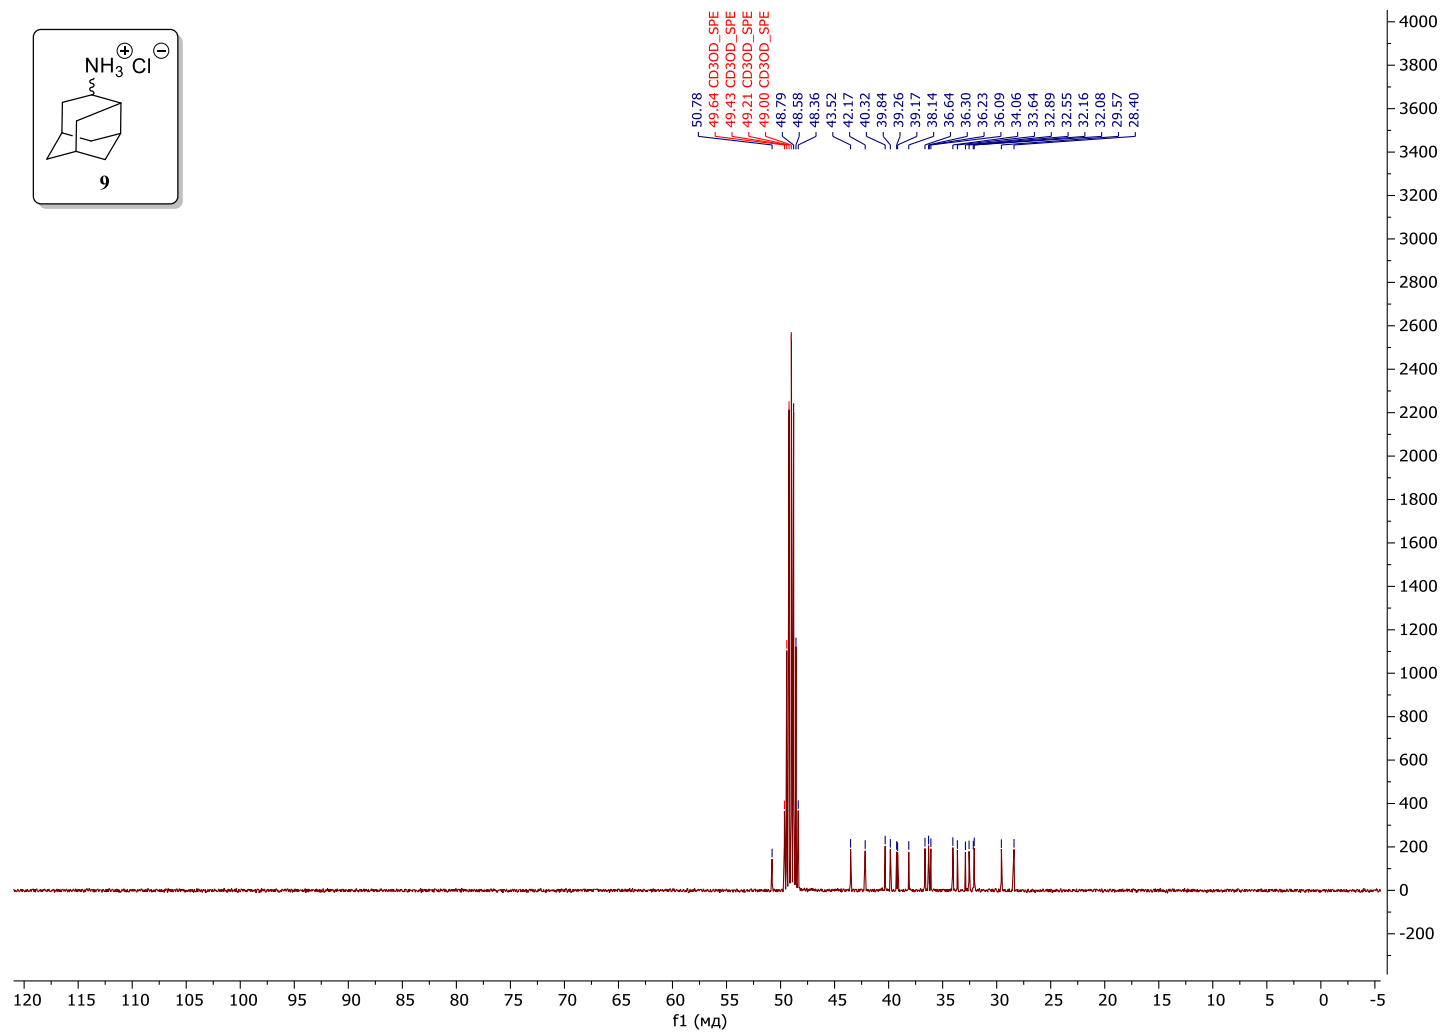

# Compound 10-11

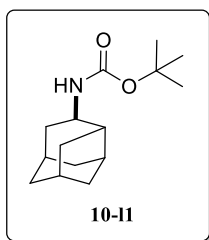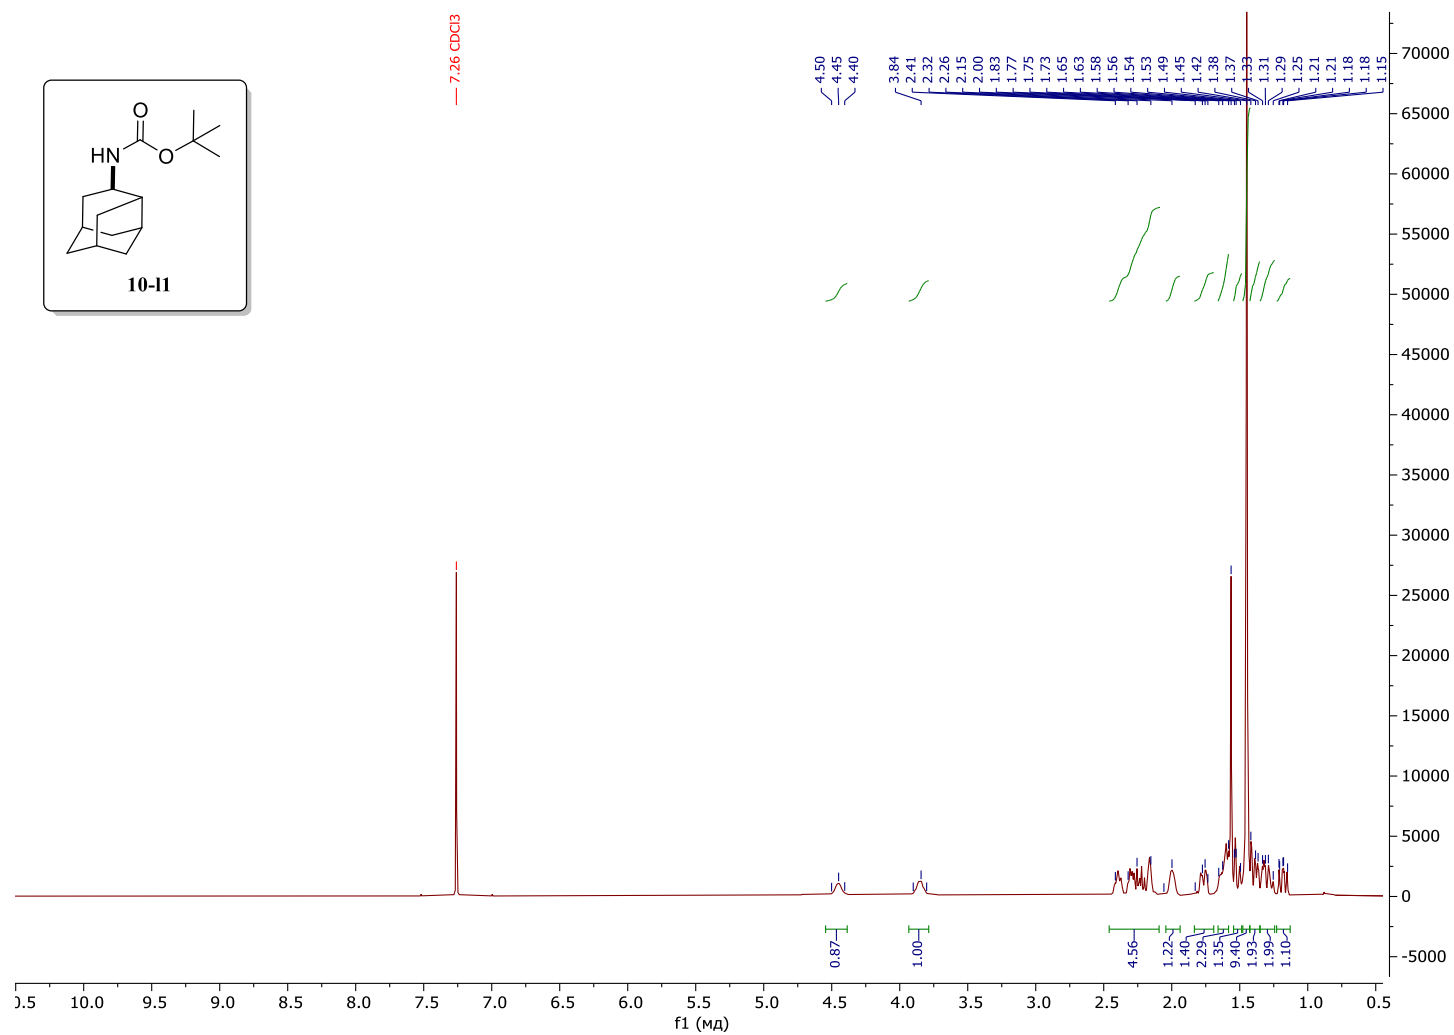

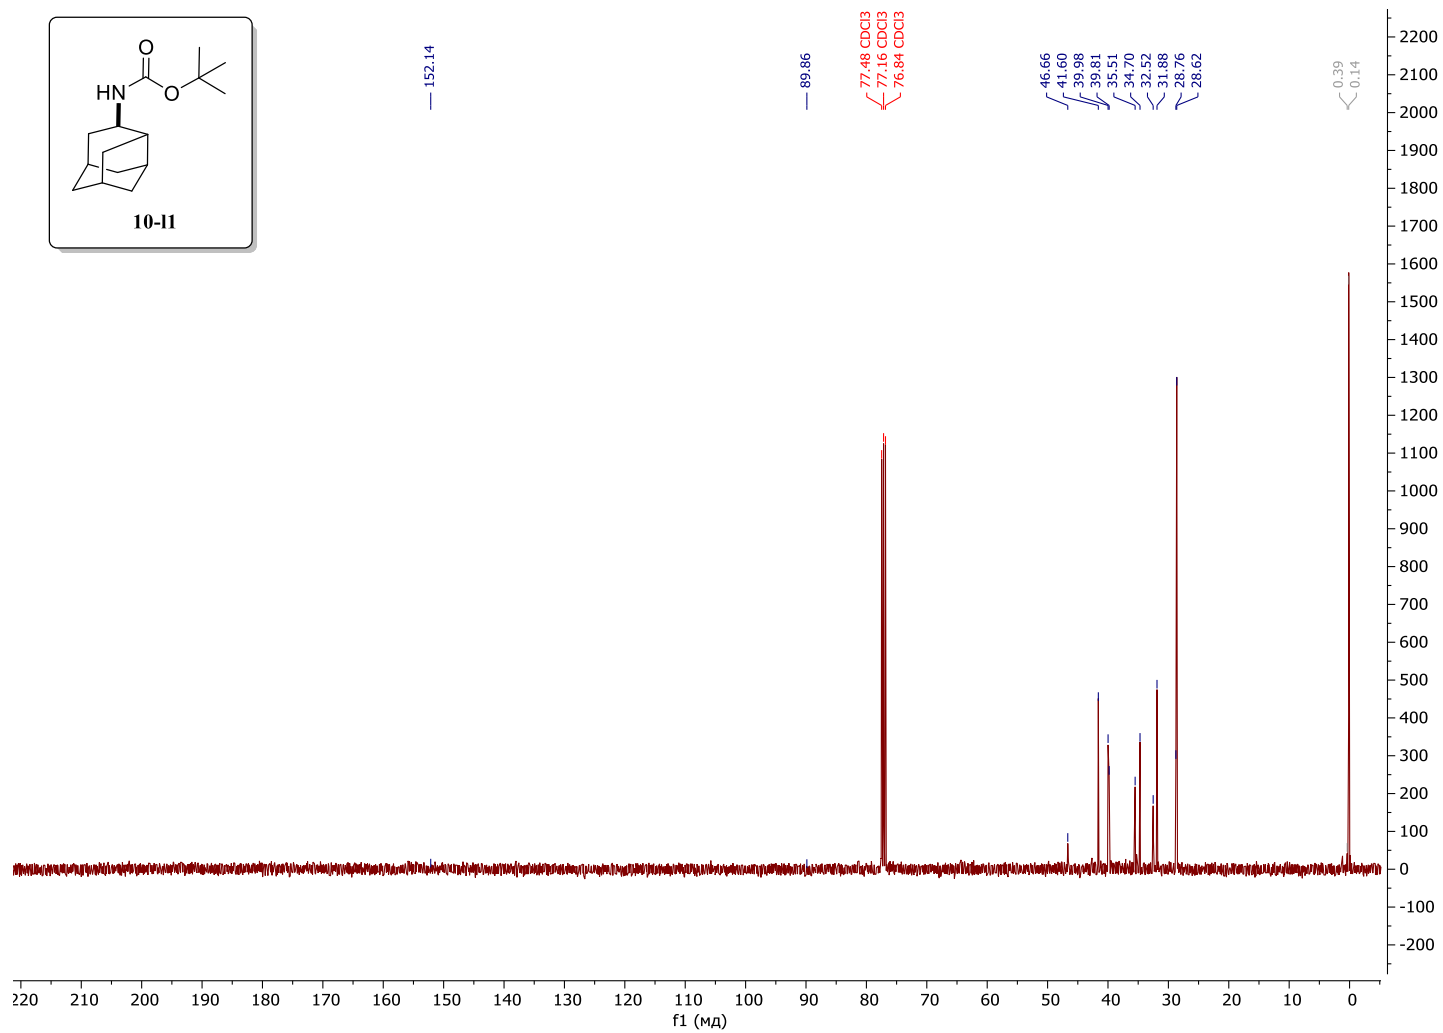

## Compound 10-I2

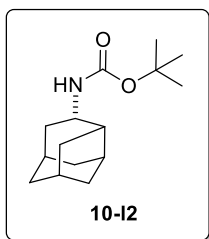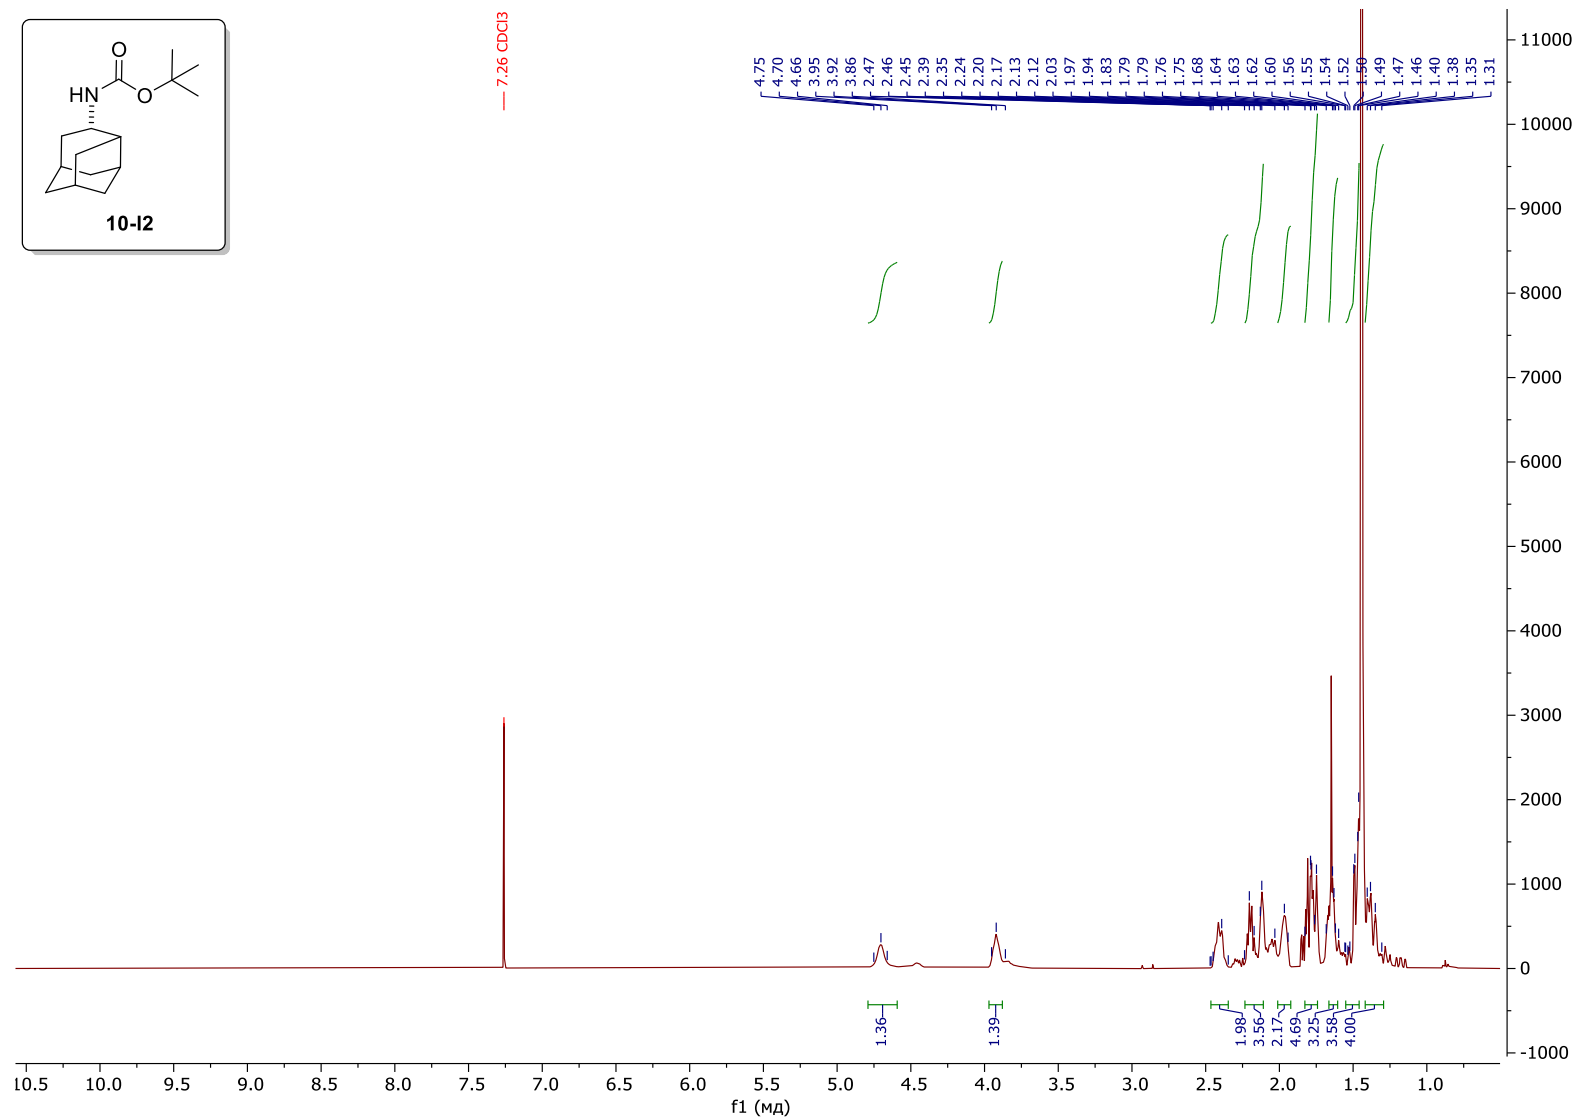

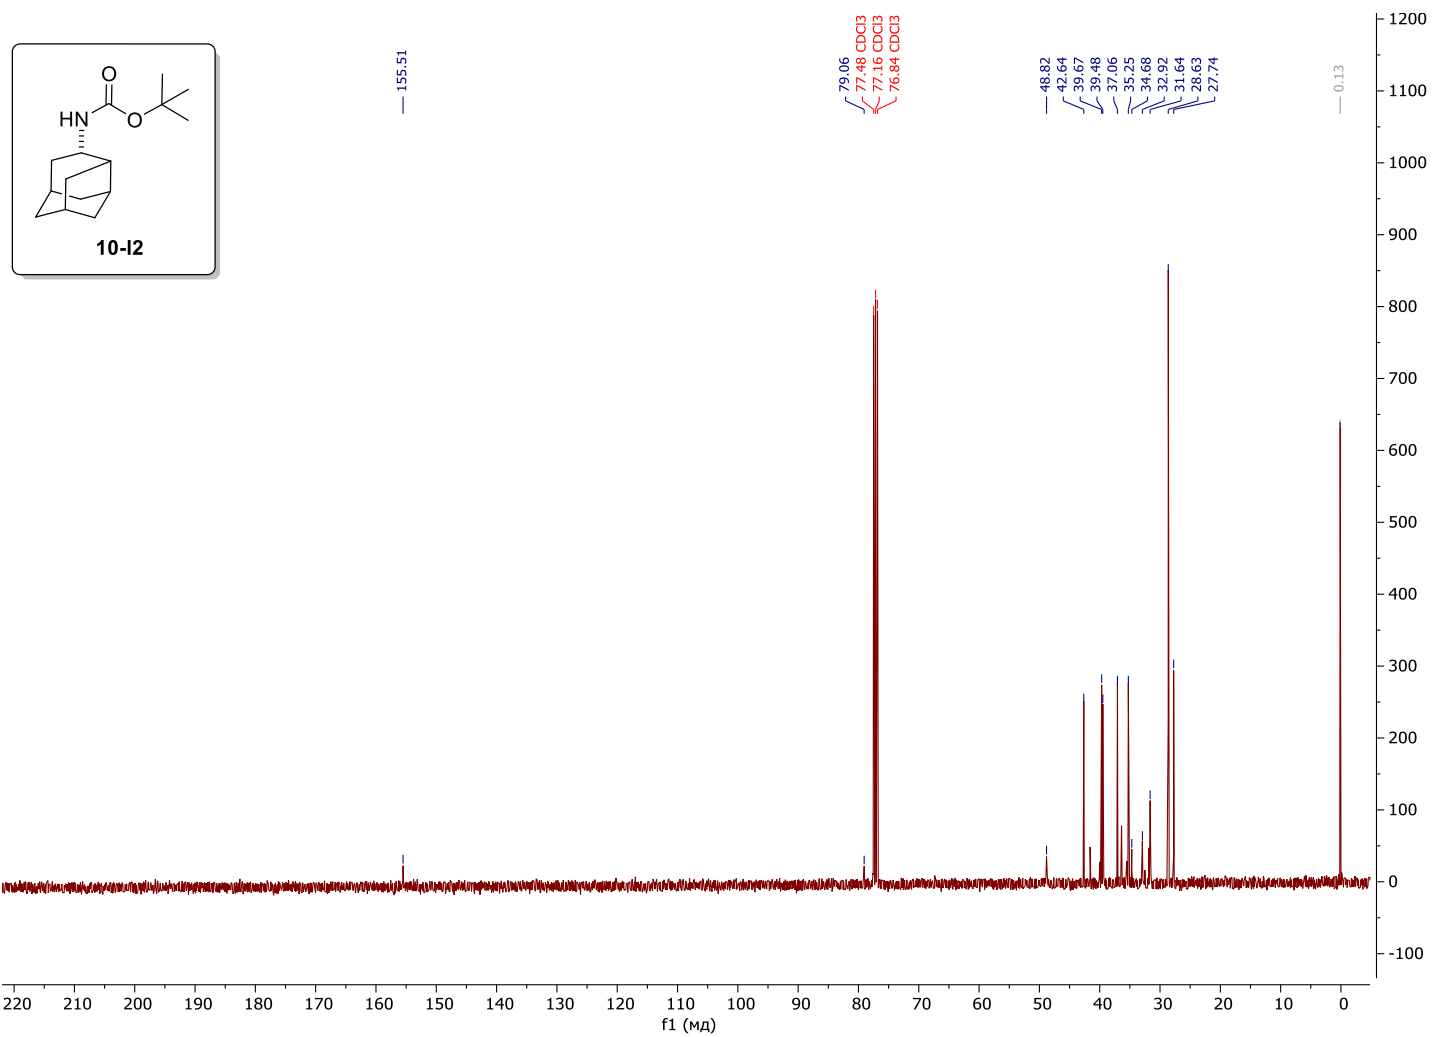

# Compound 11

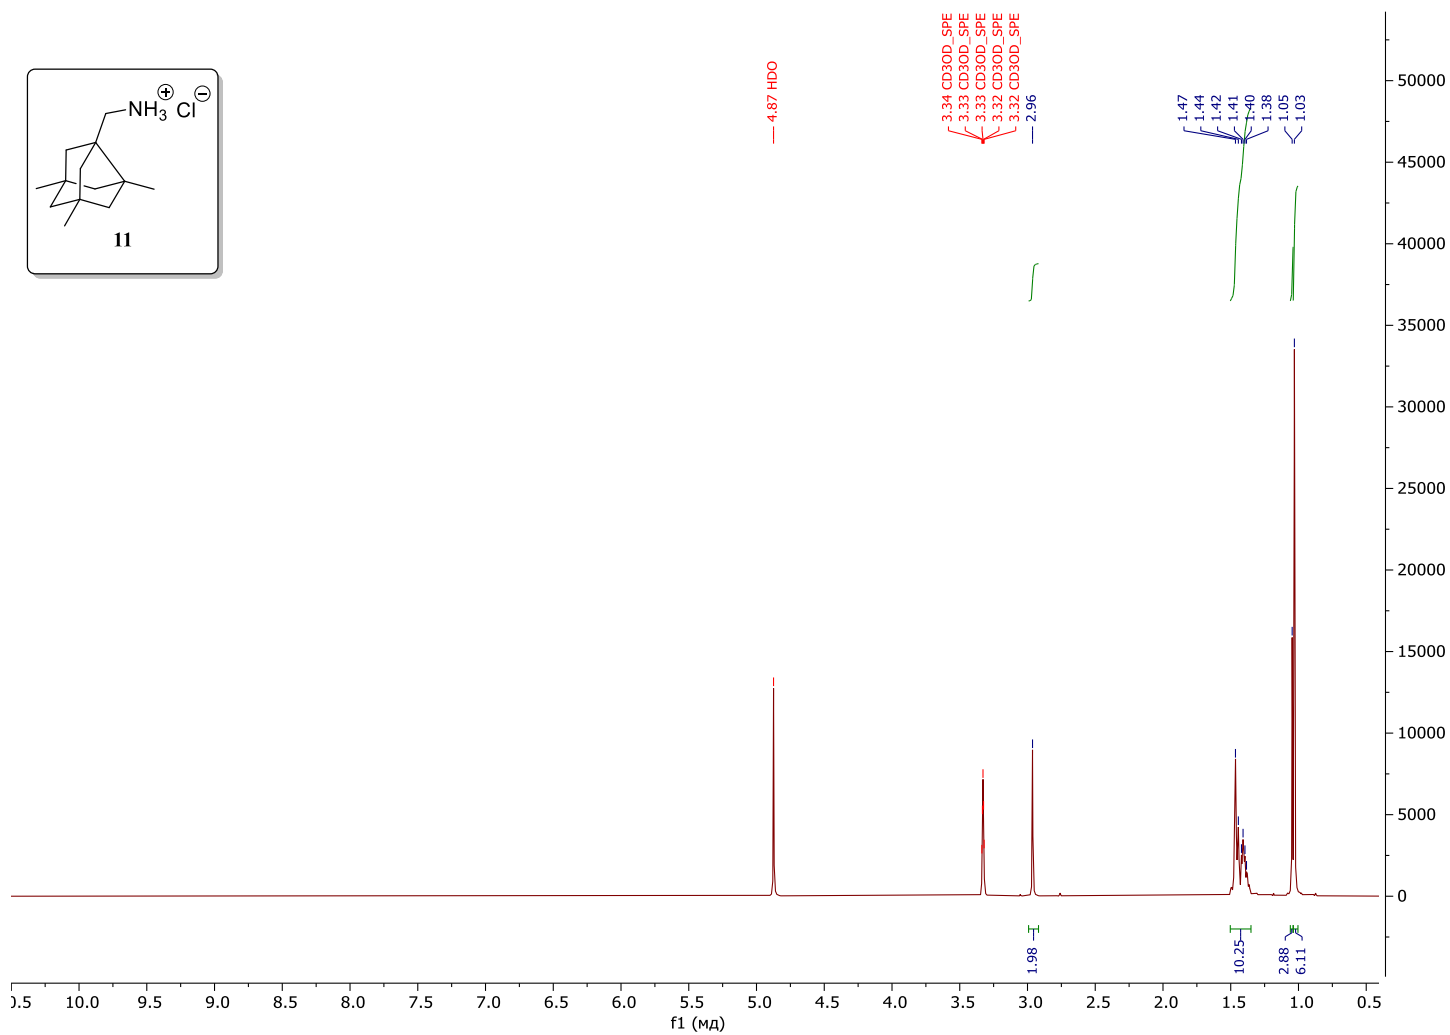

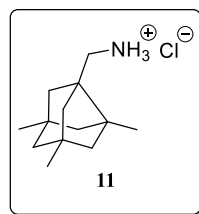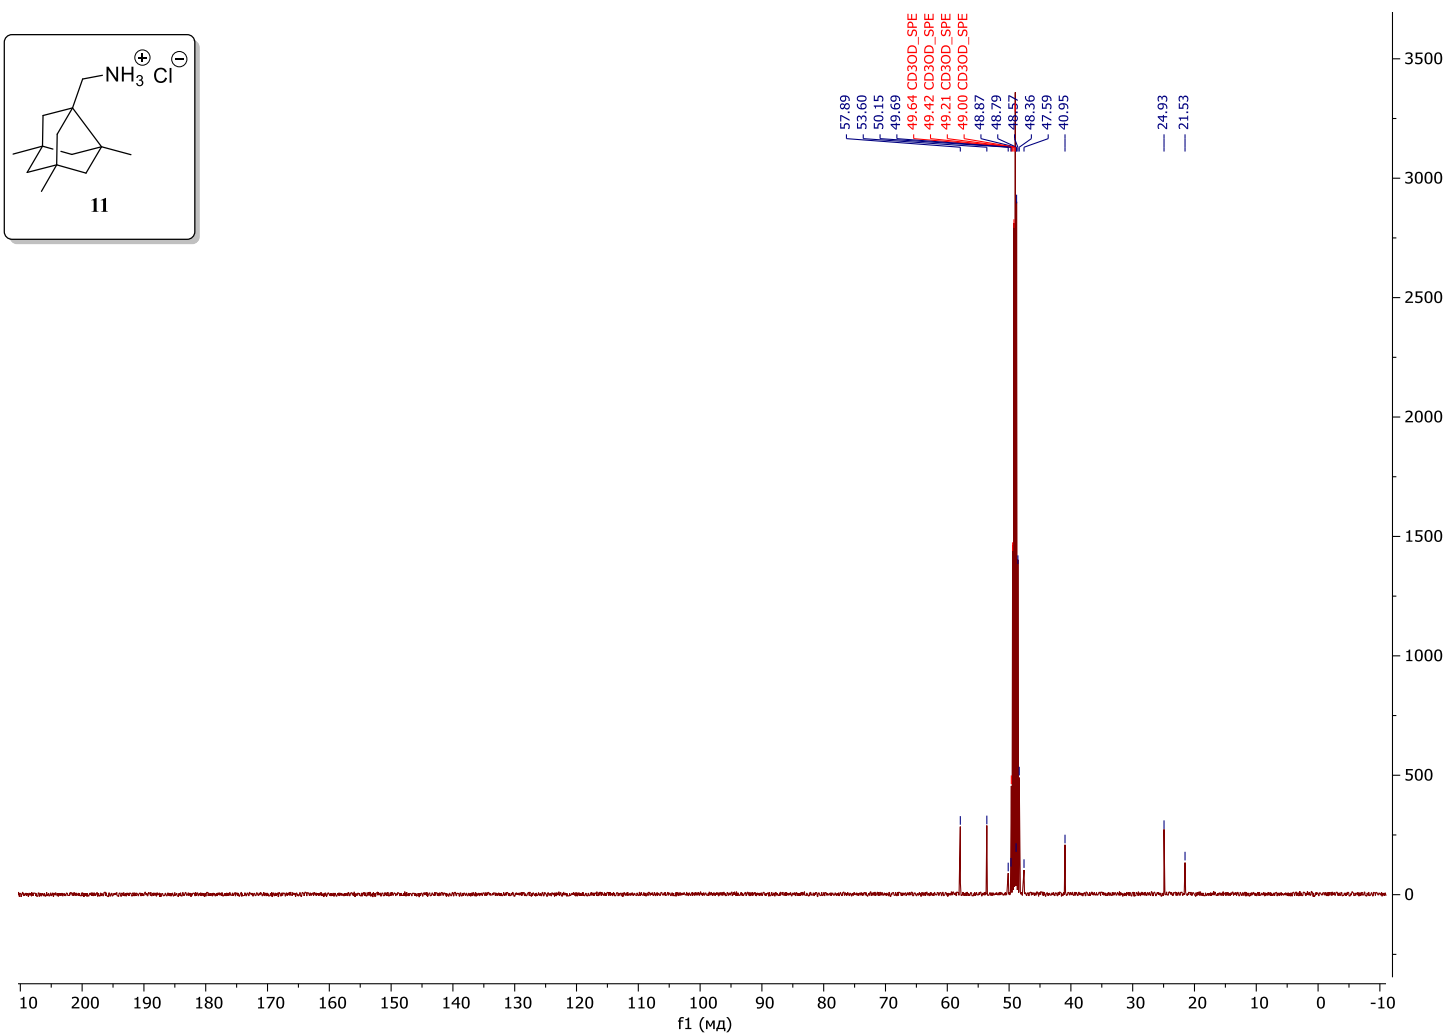



# Compound 12

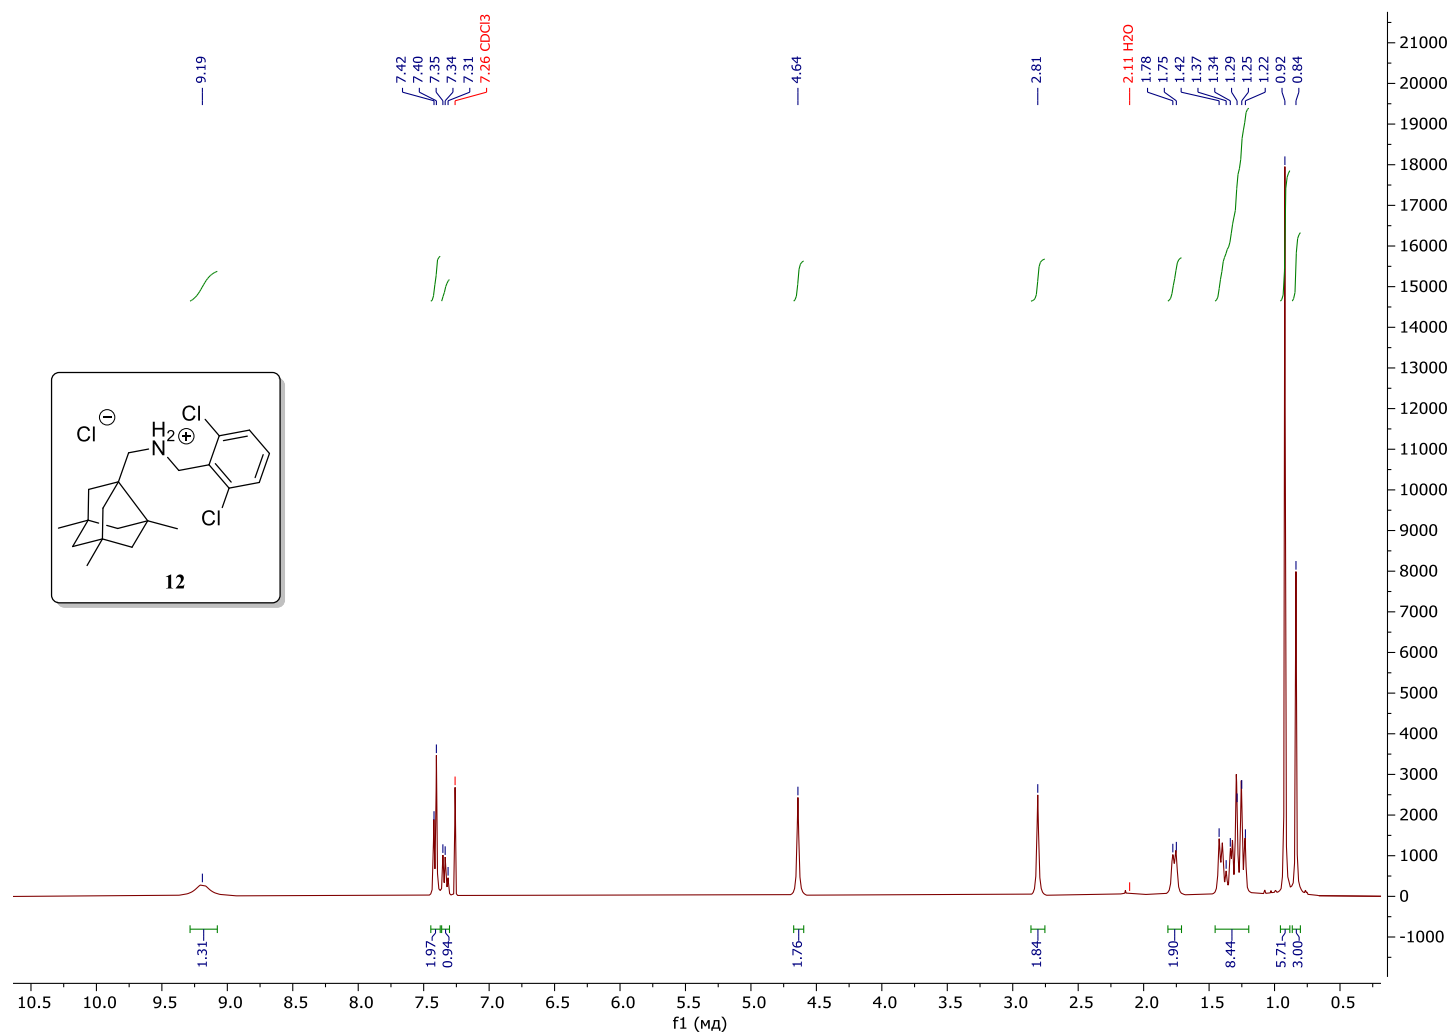

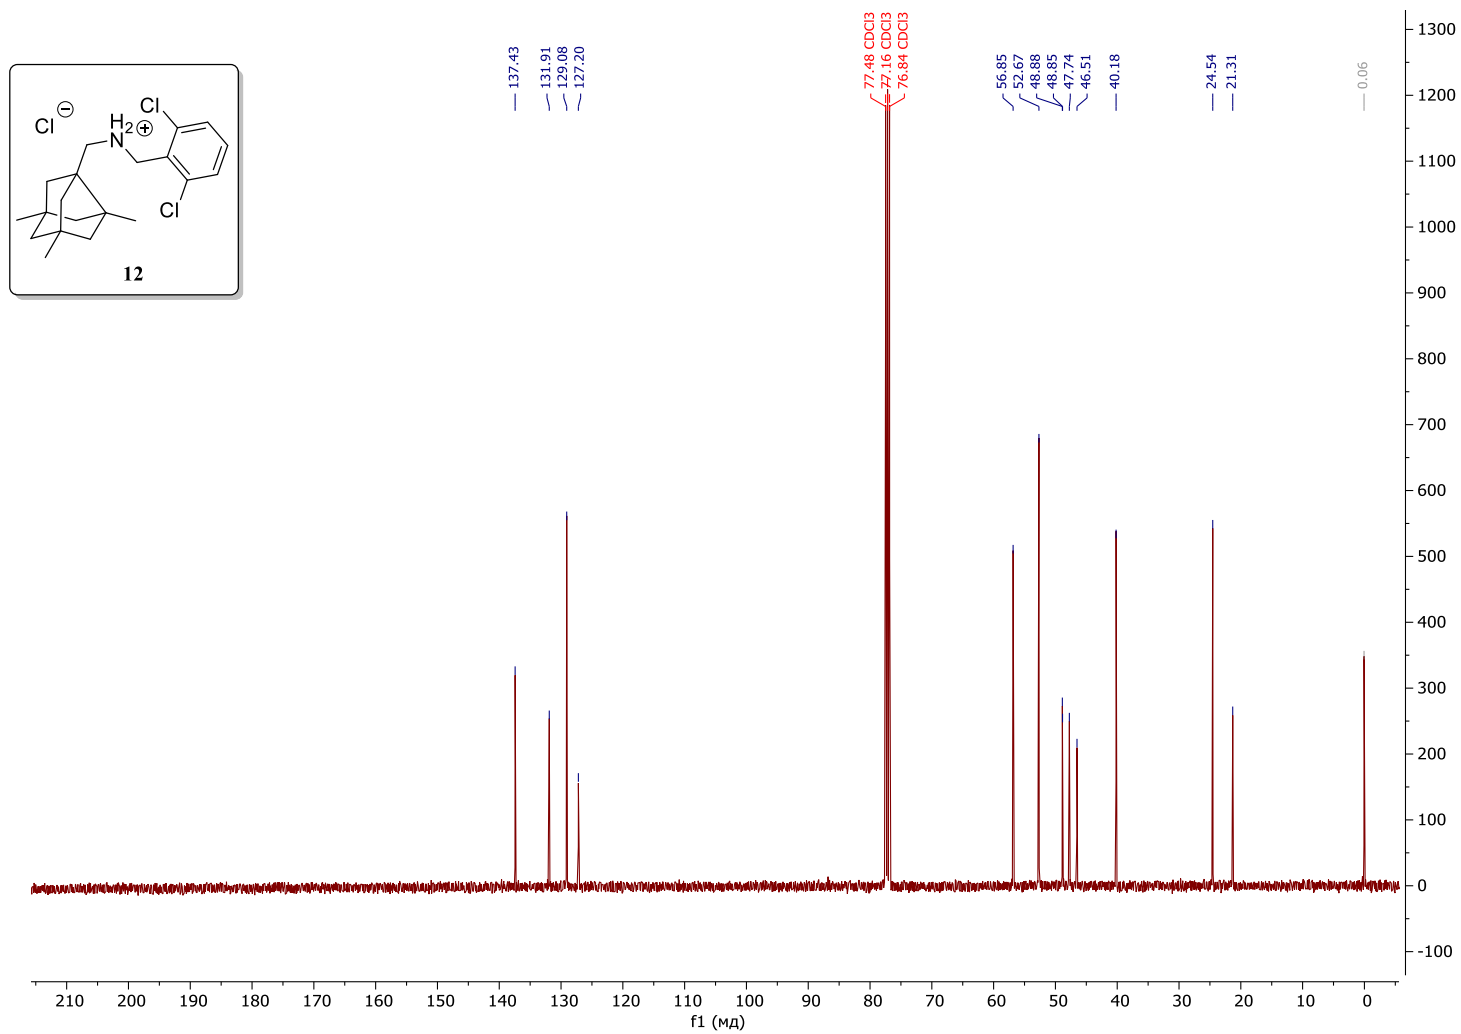

## Compound 13

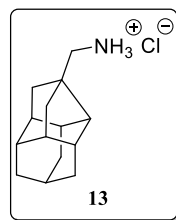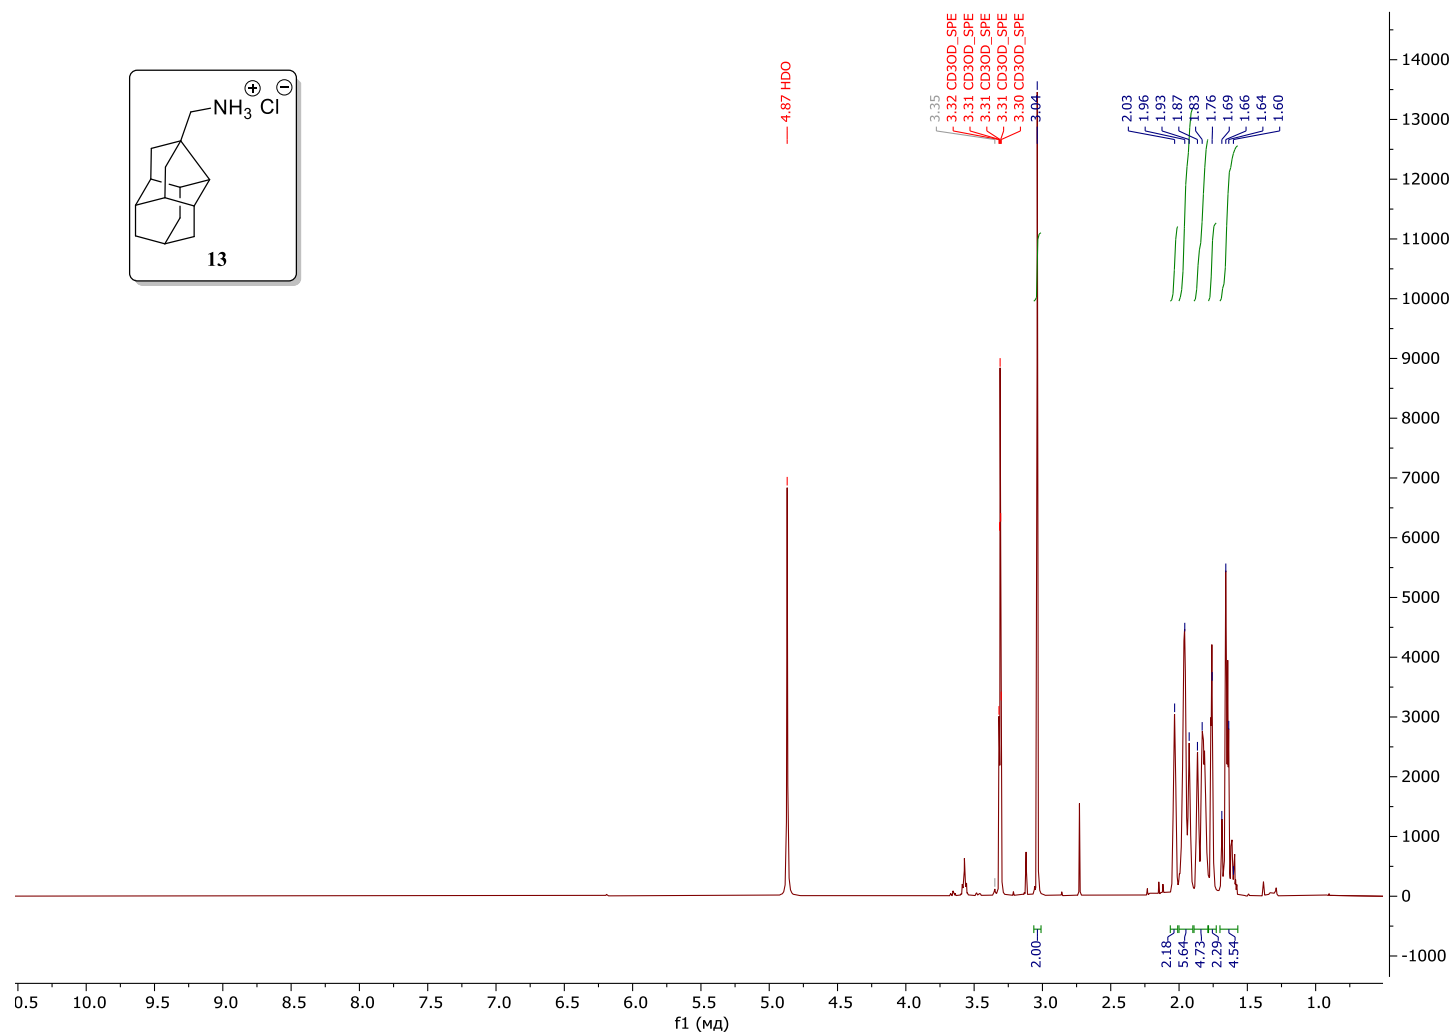

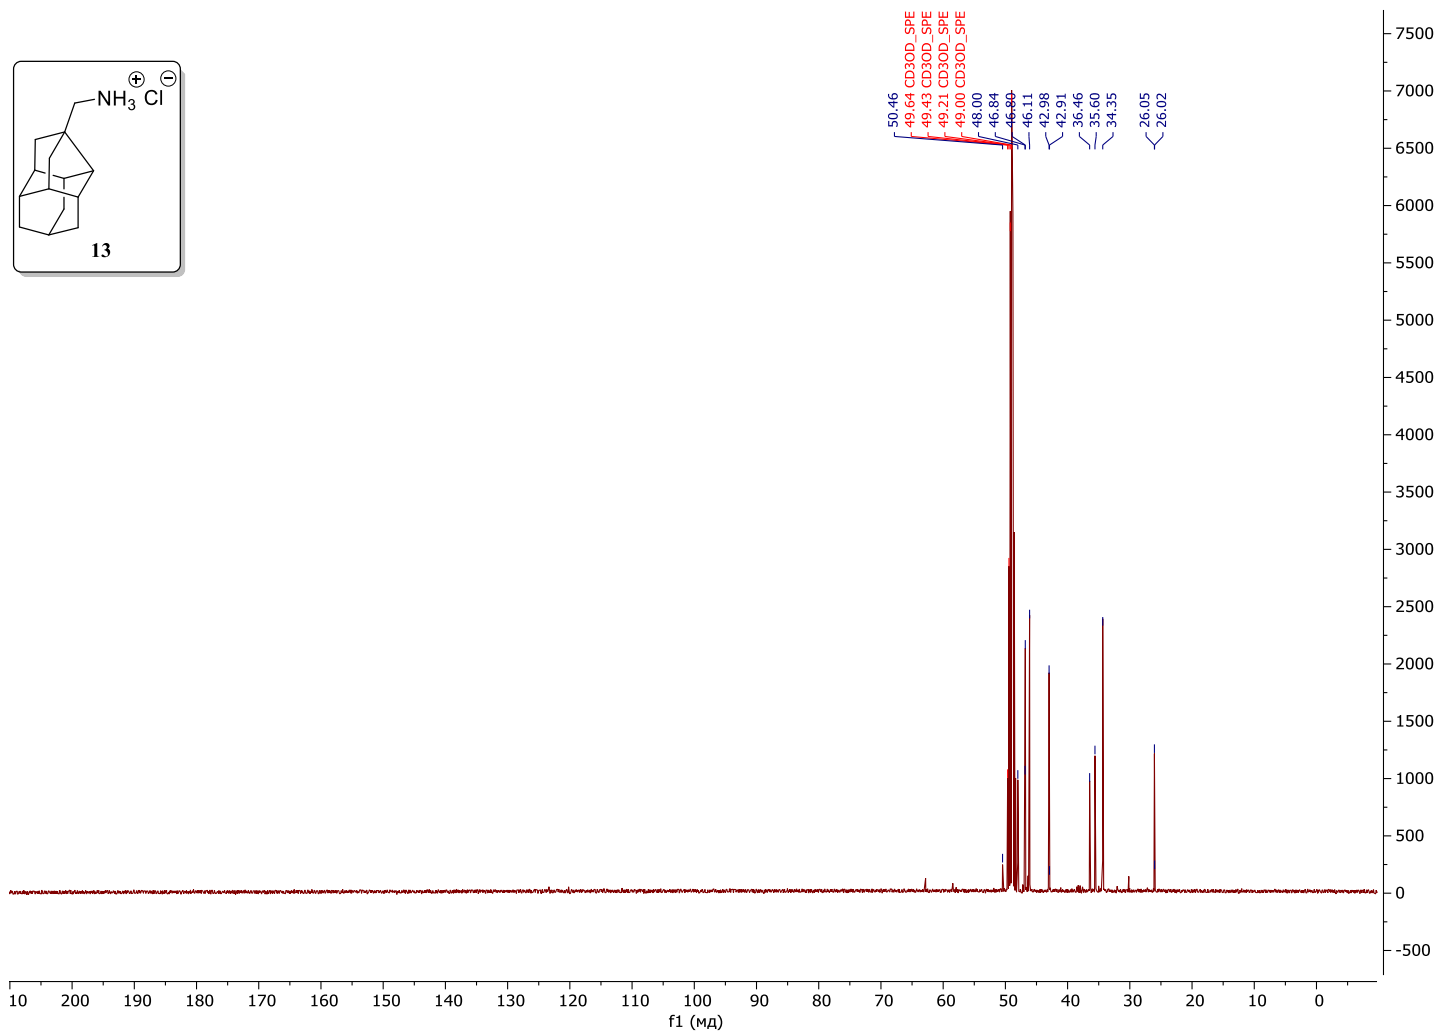

# Compound 14

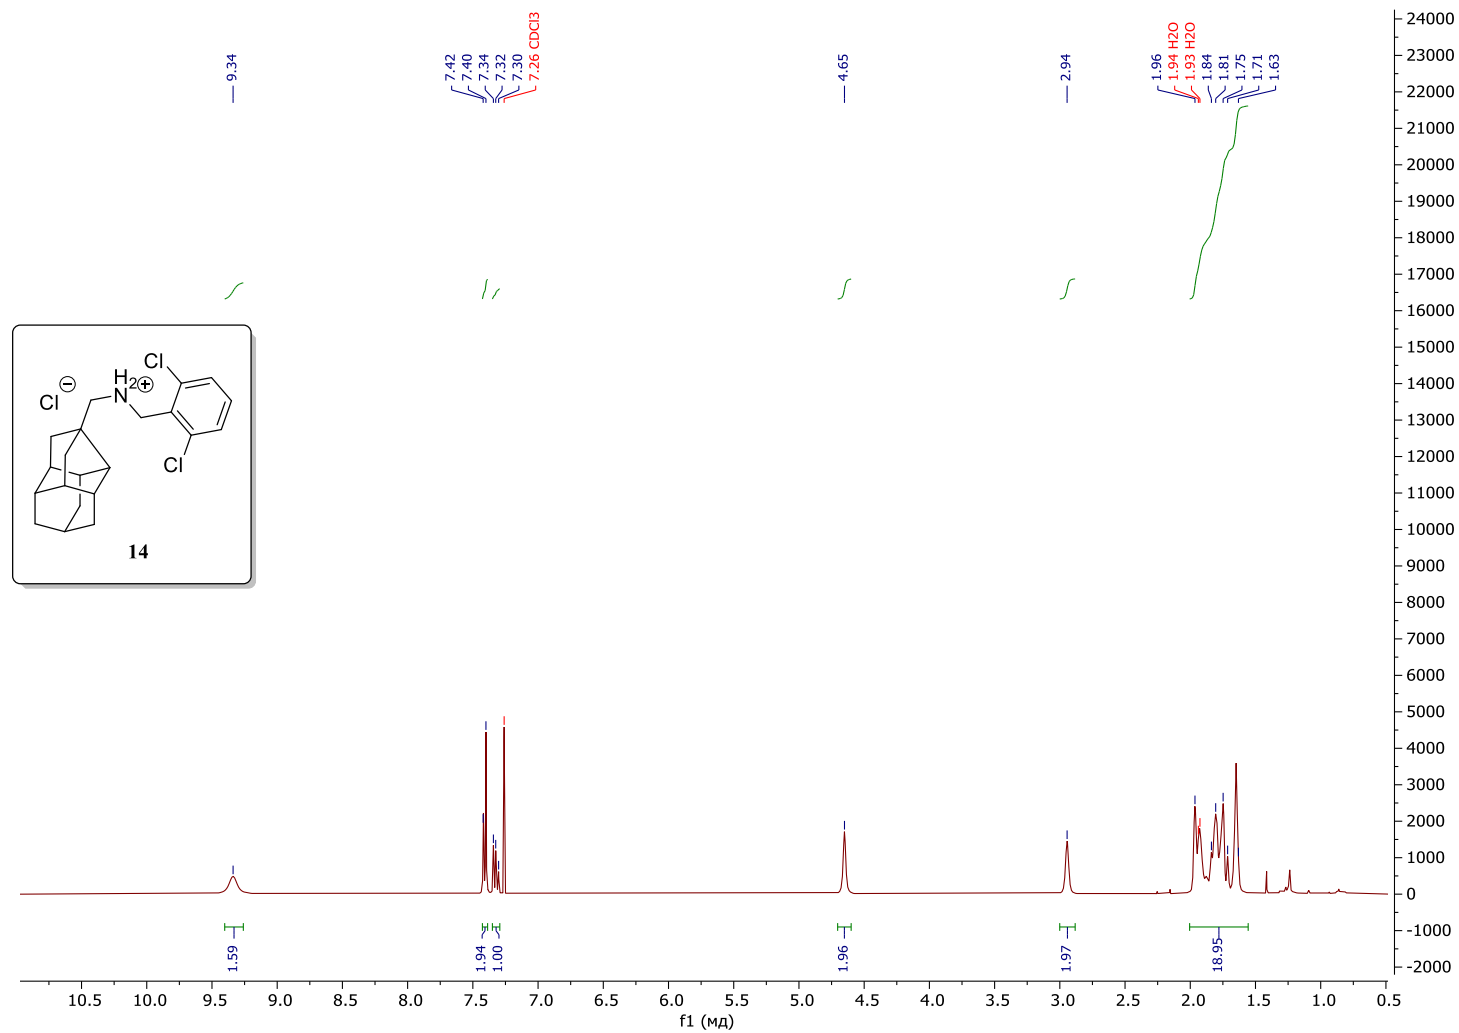

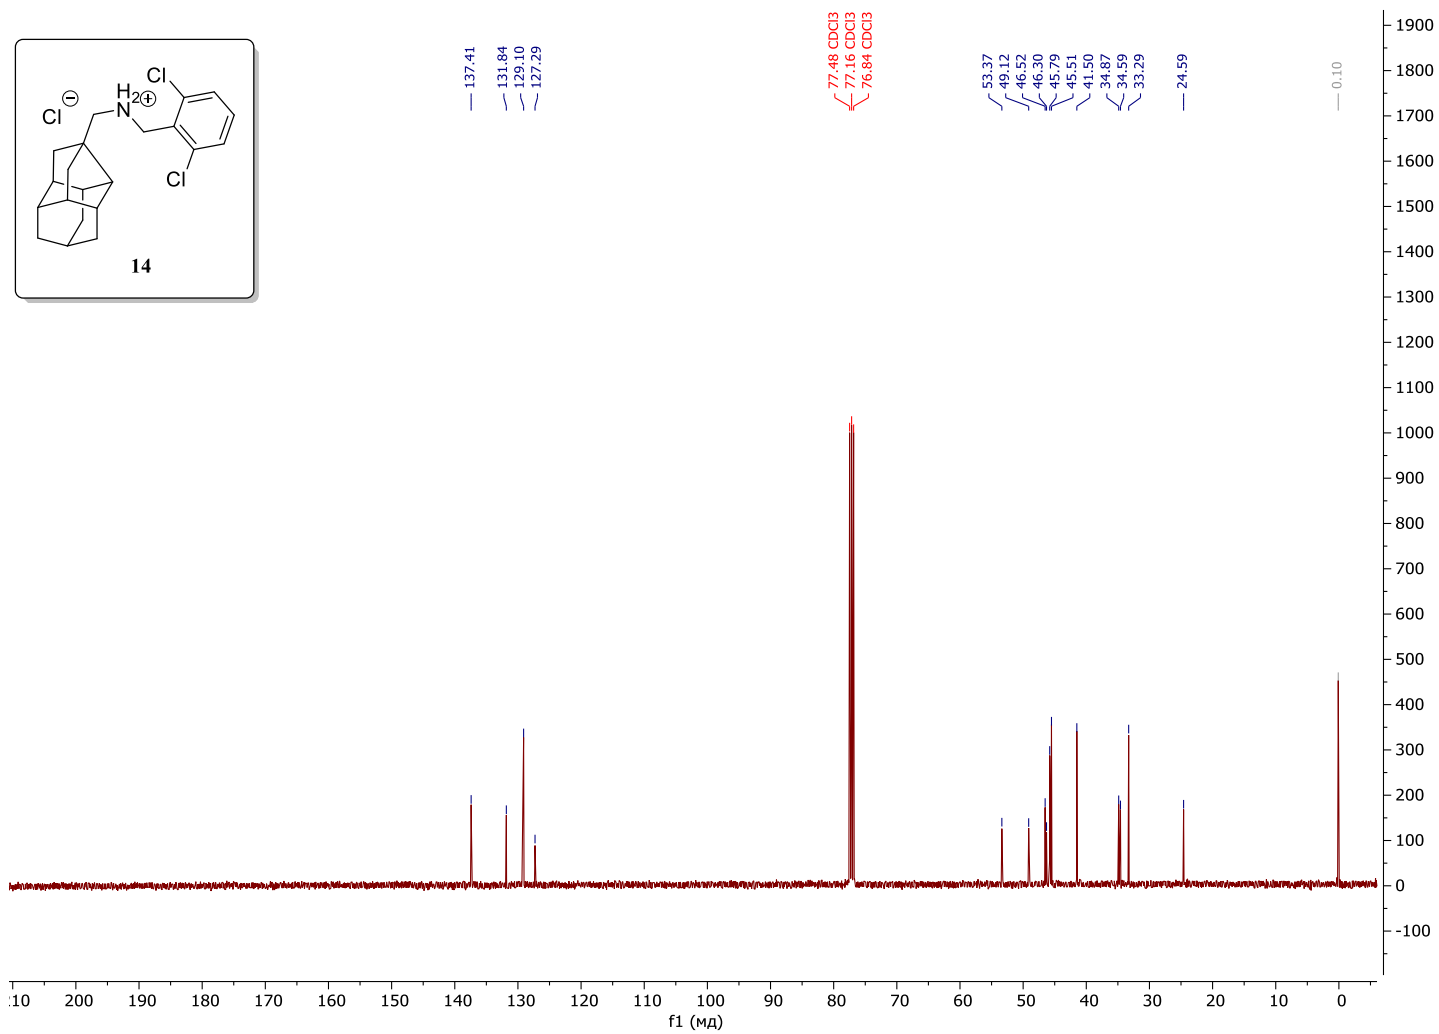

# Compound 15

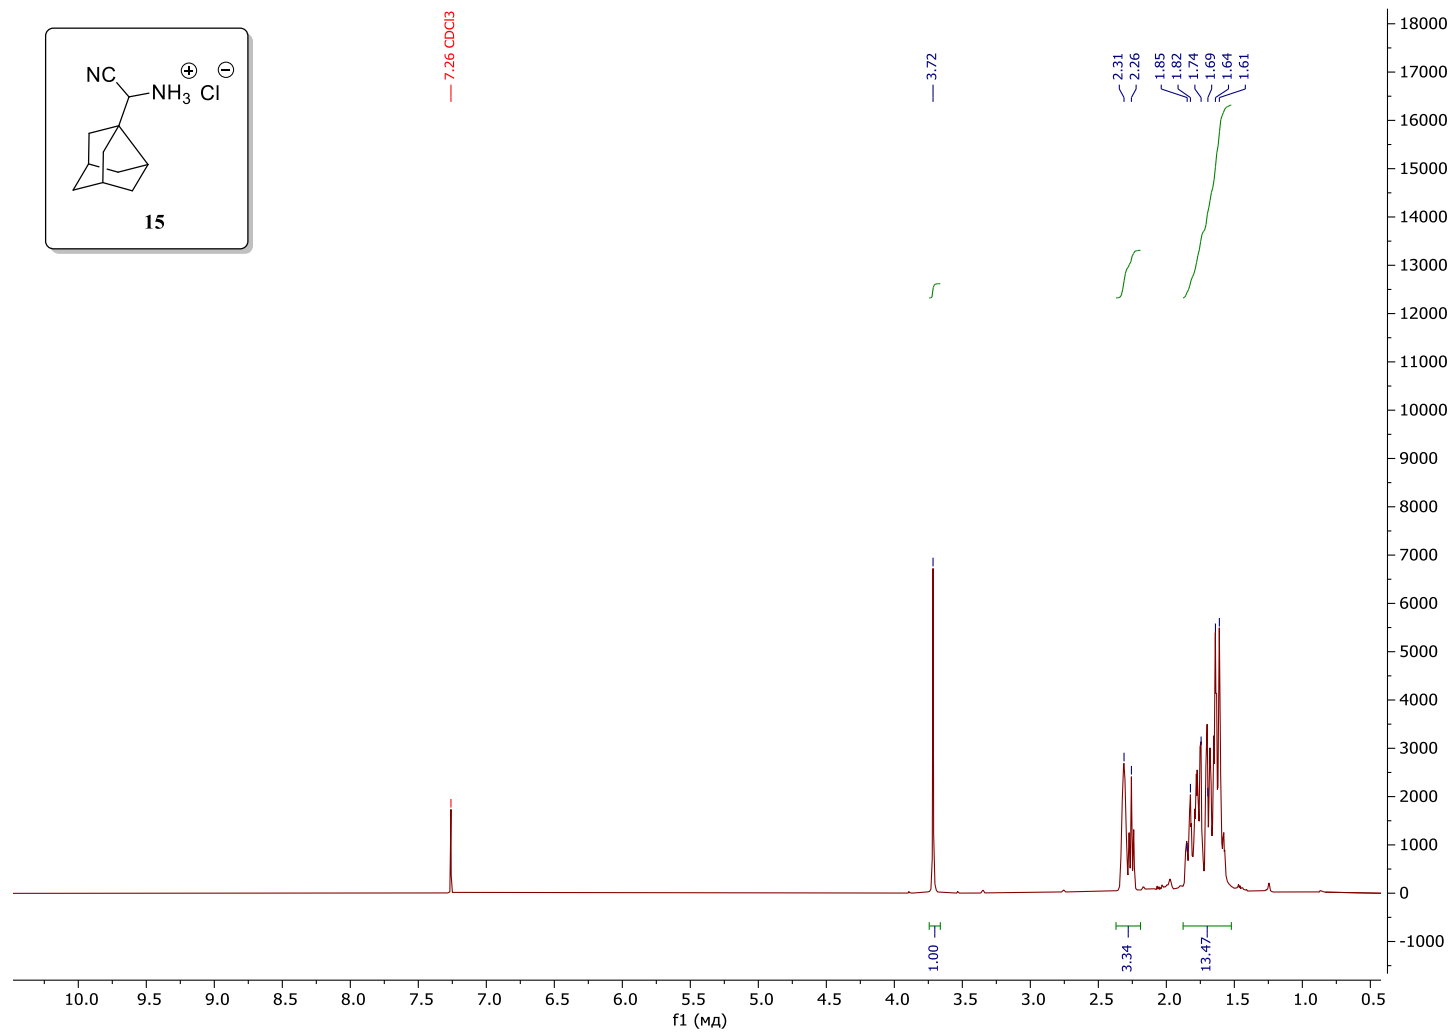

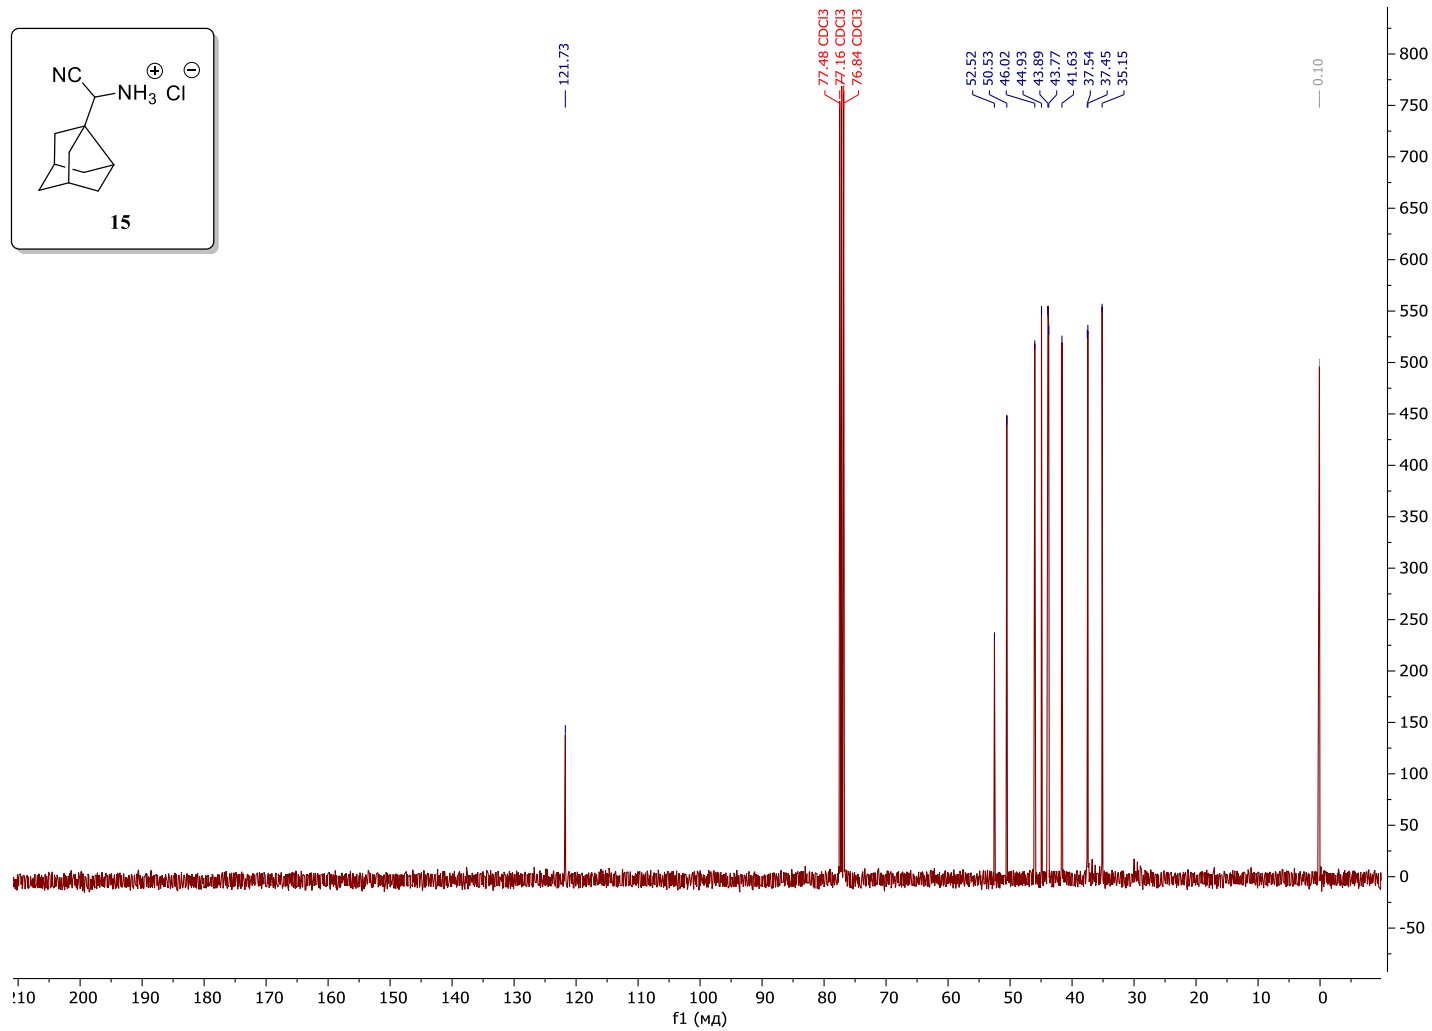



## Compound 16

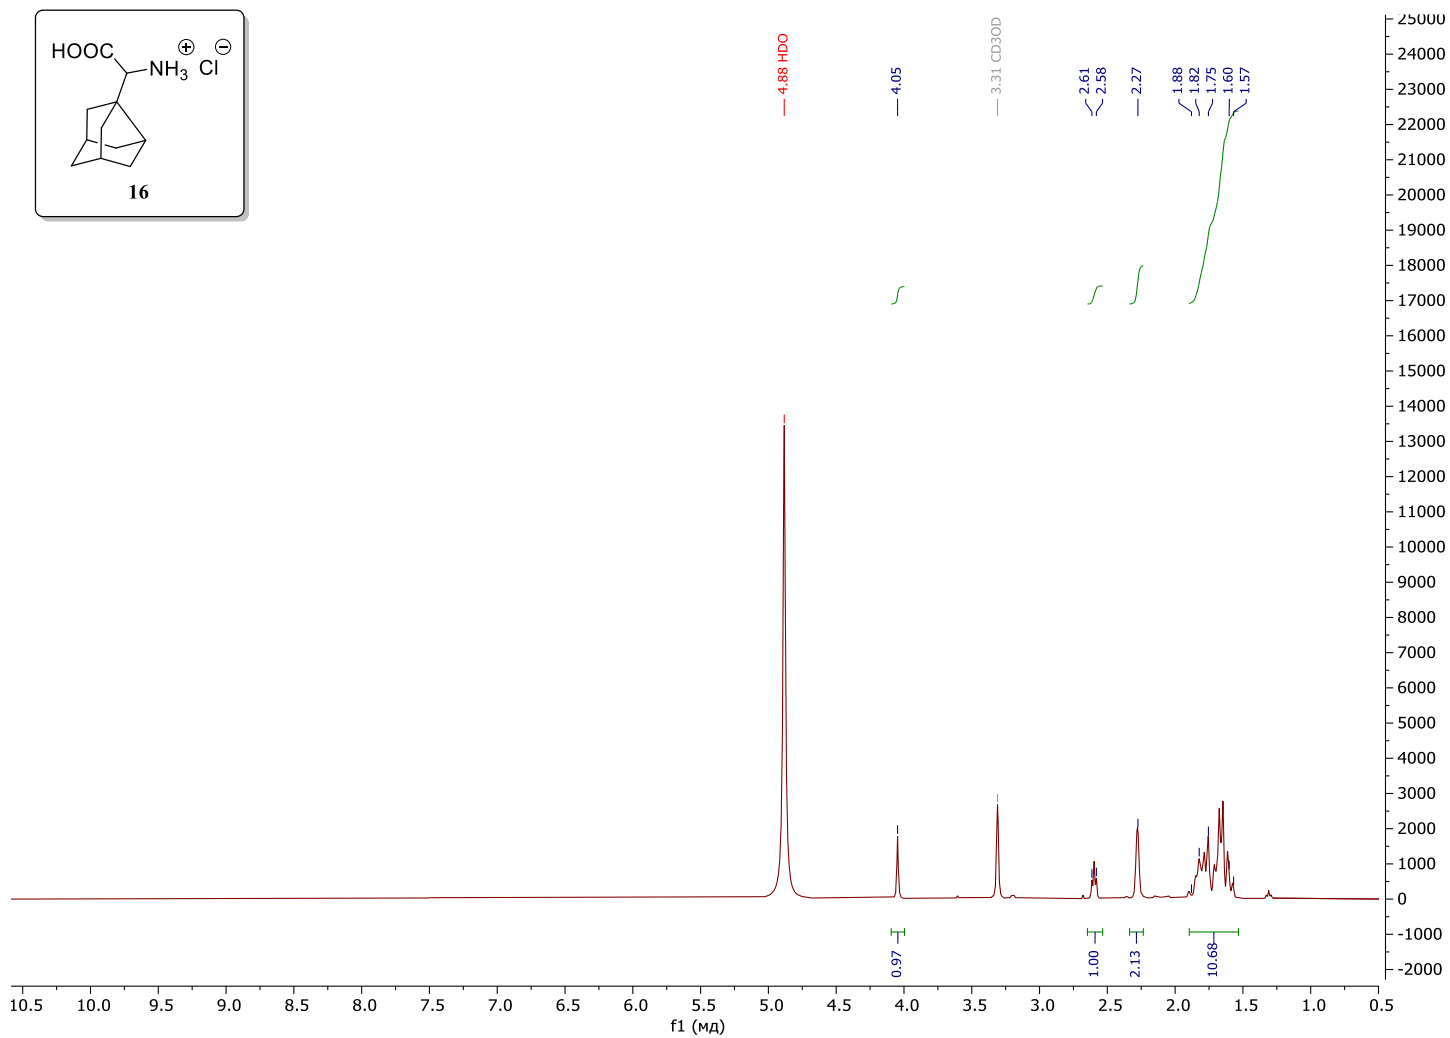

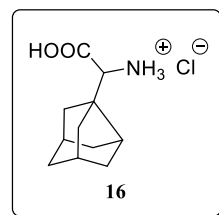

— 170.76

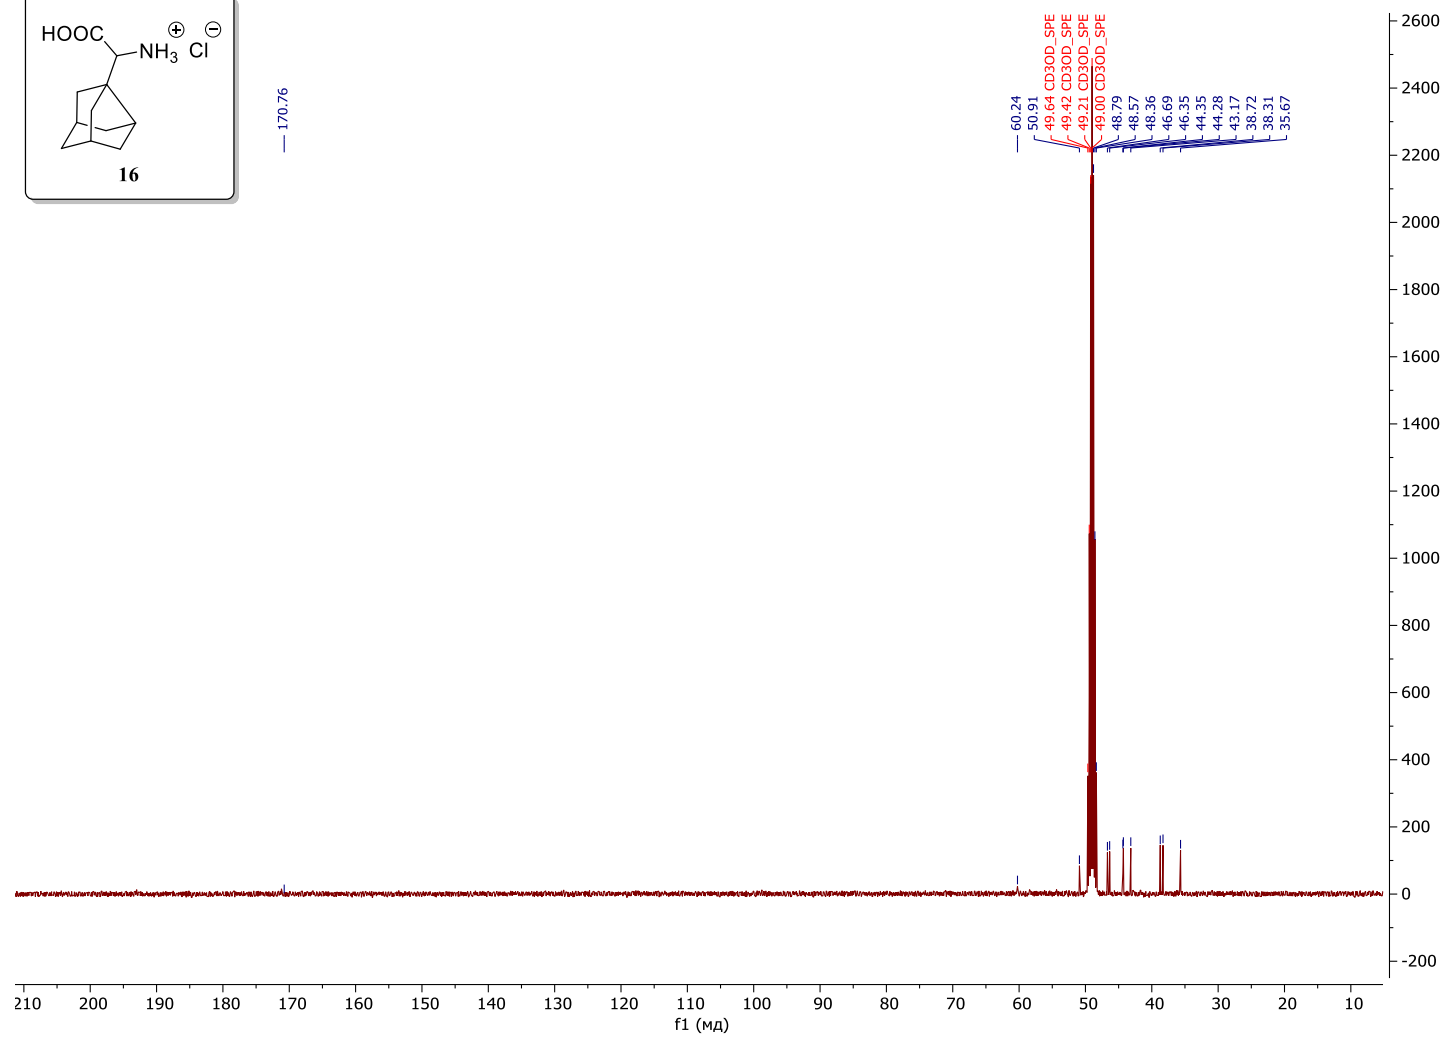

# Compound 17

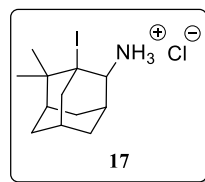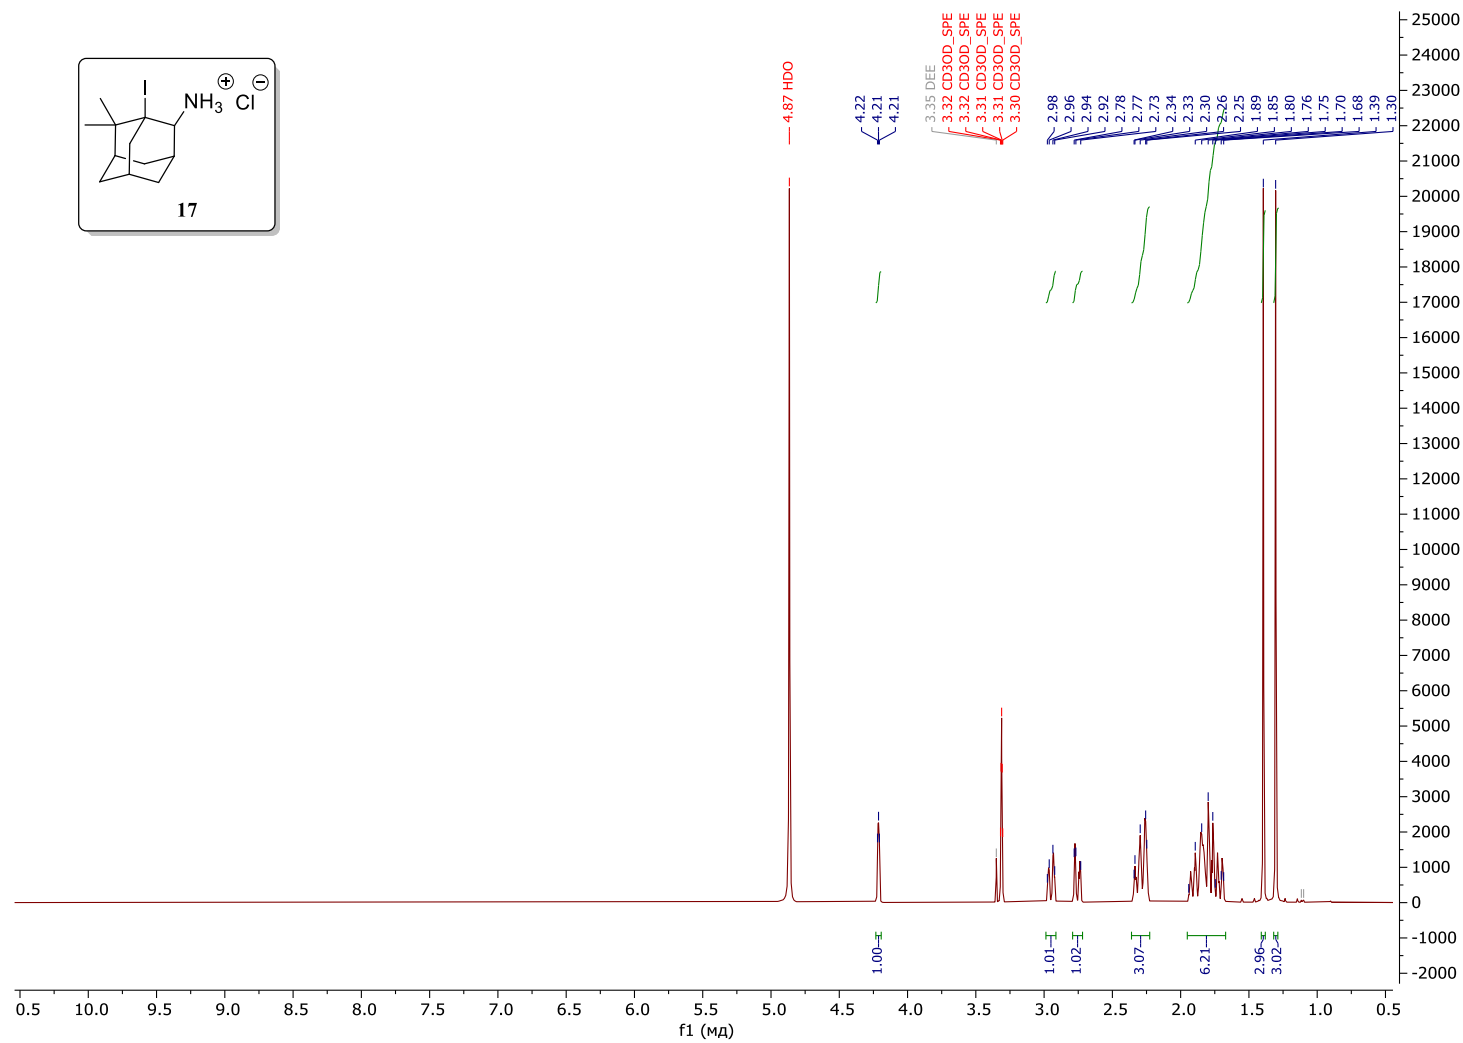

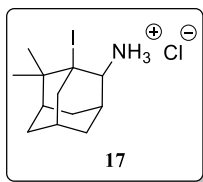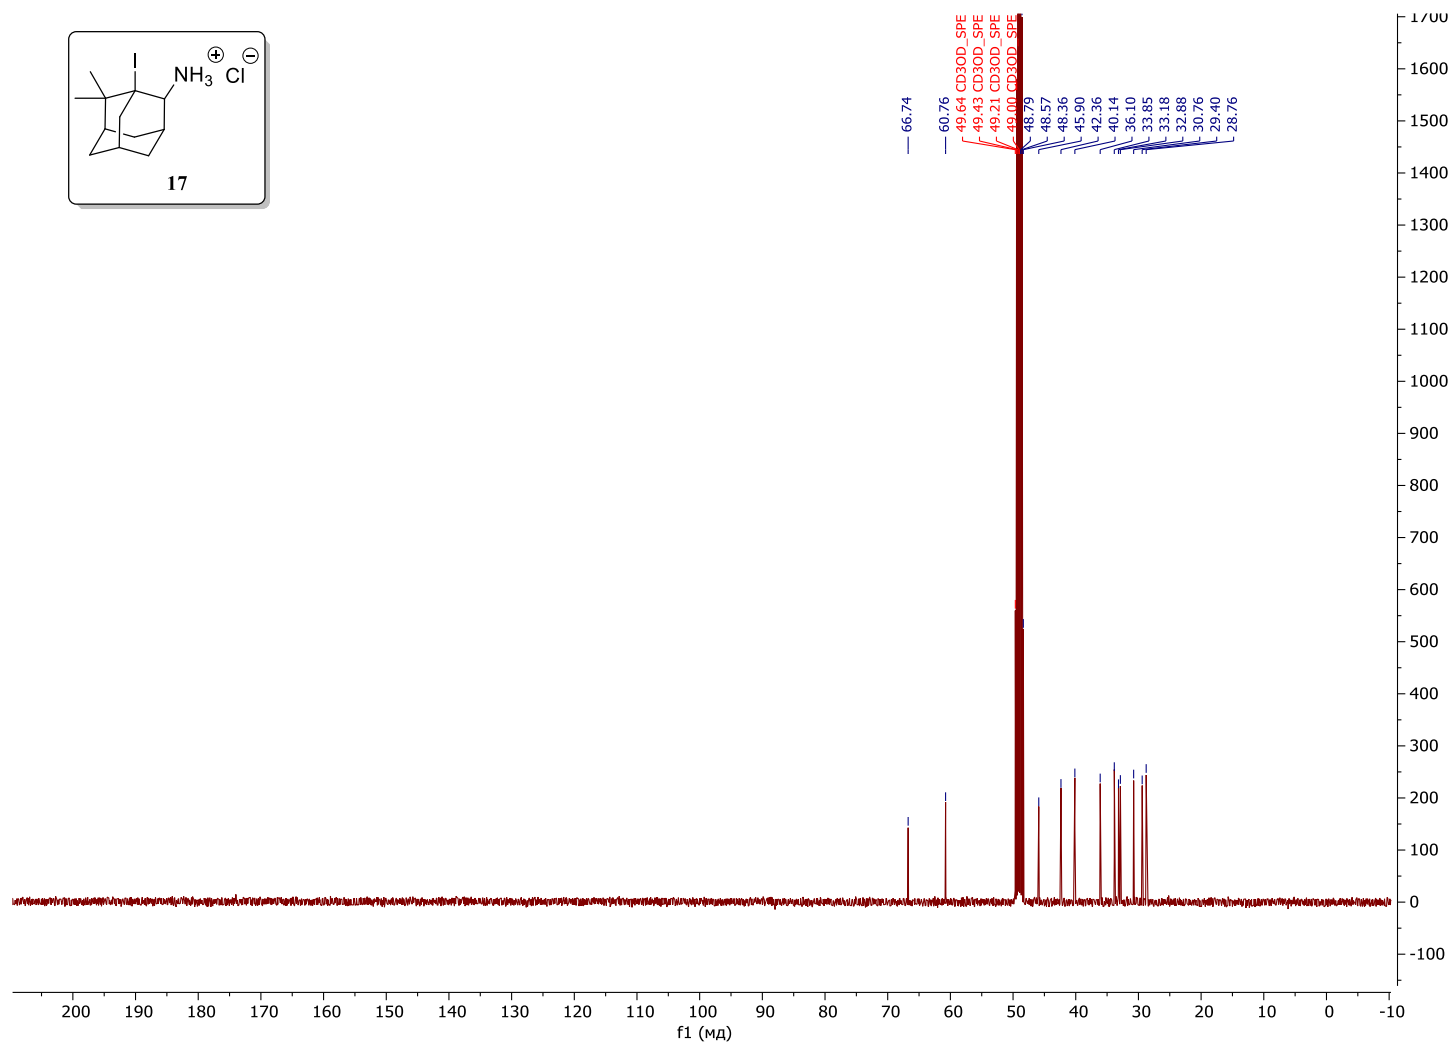

# Compound 18

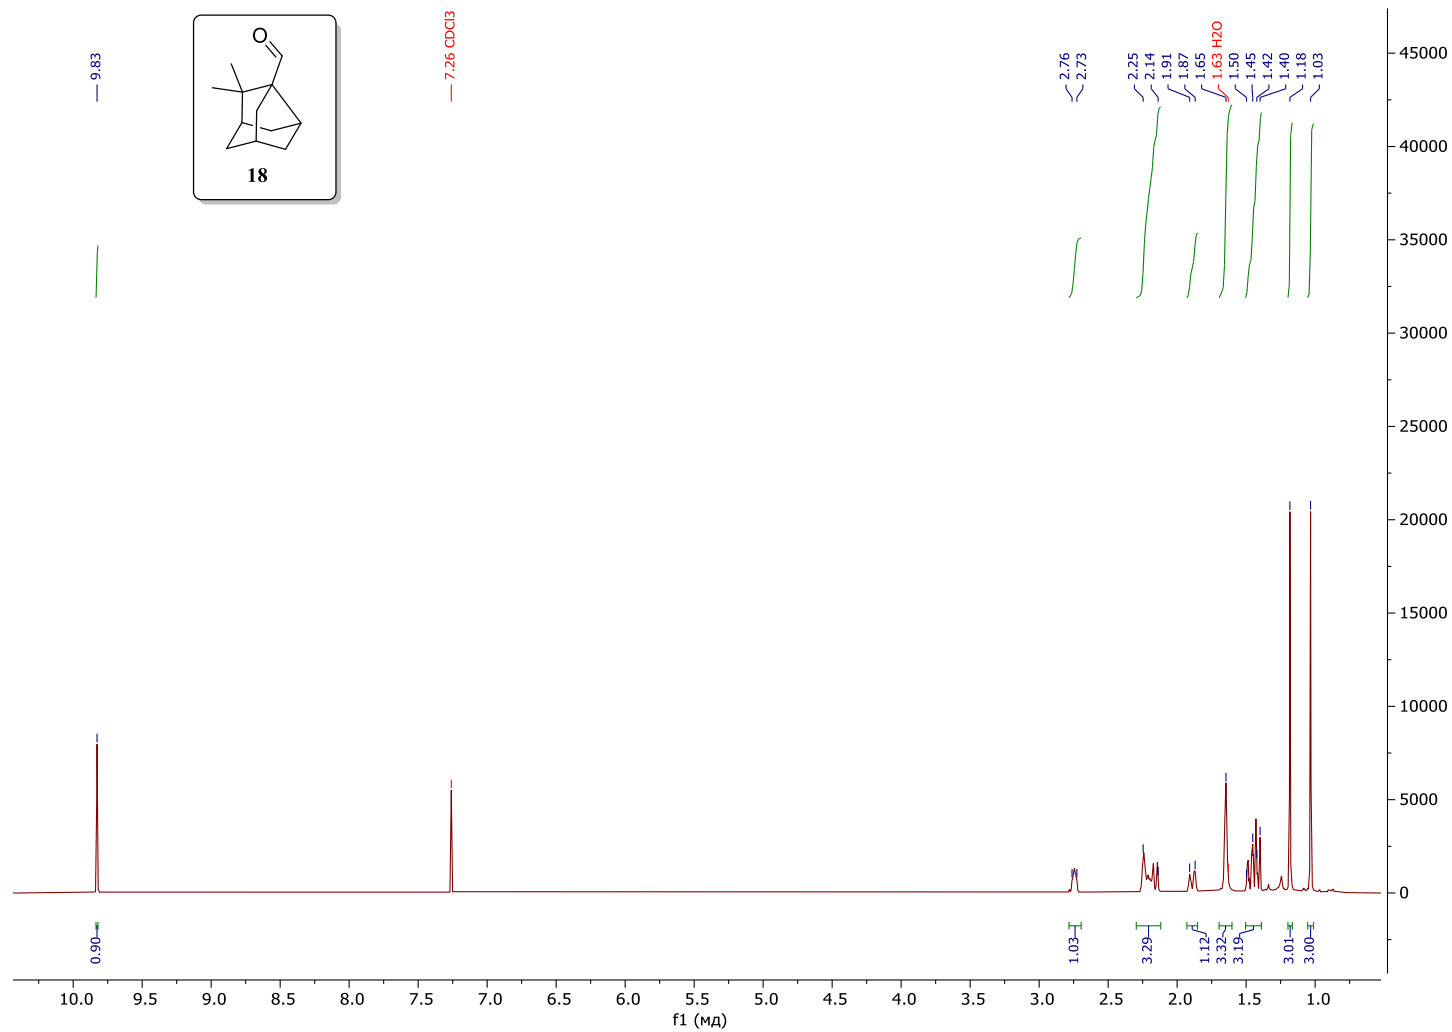

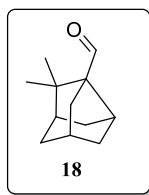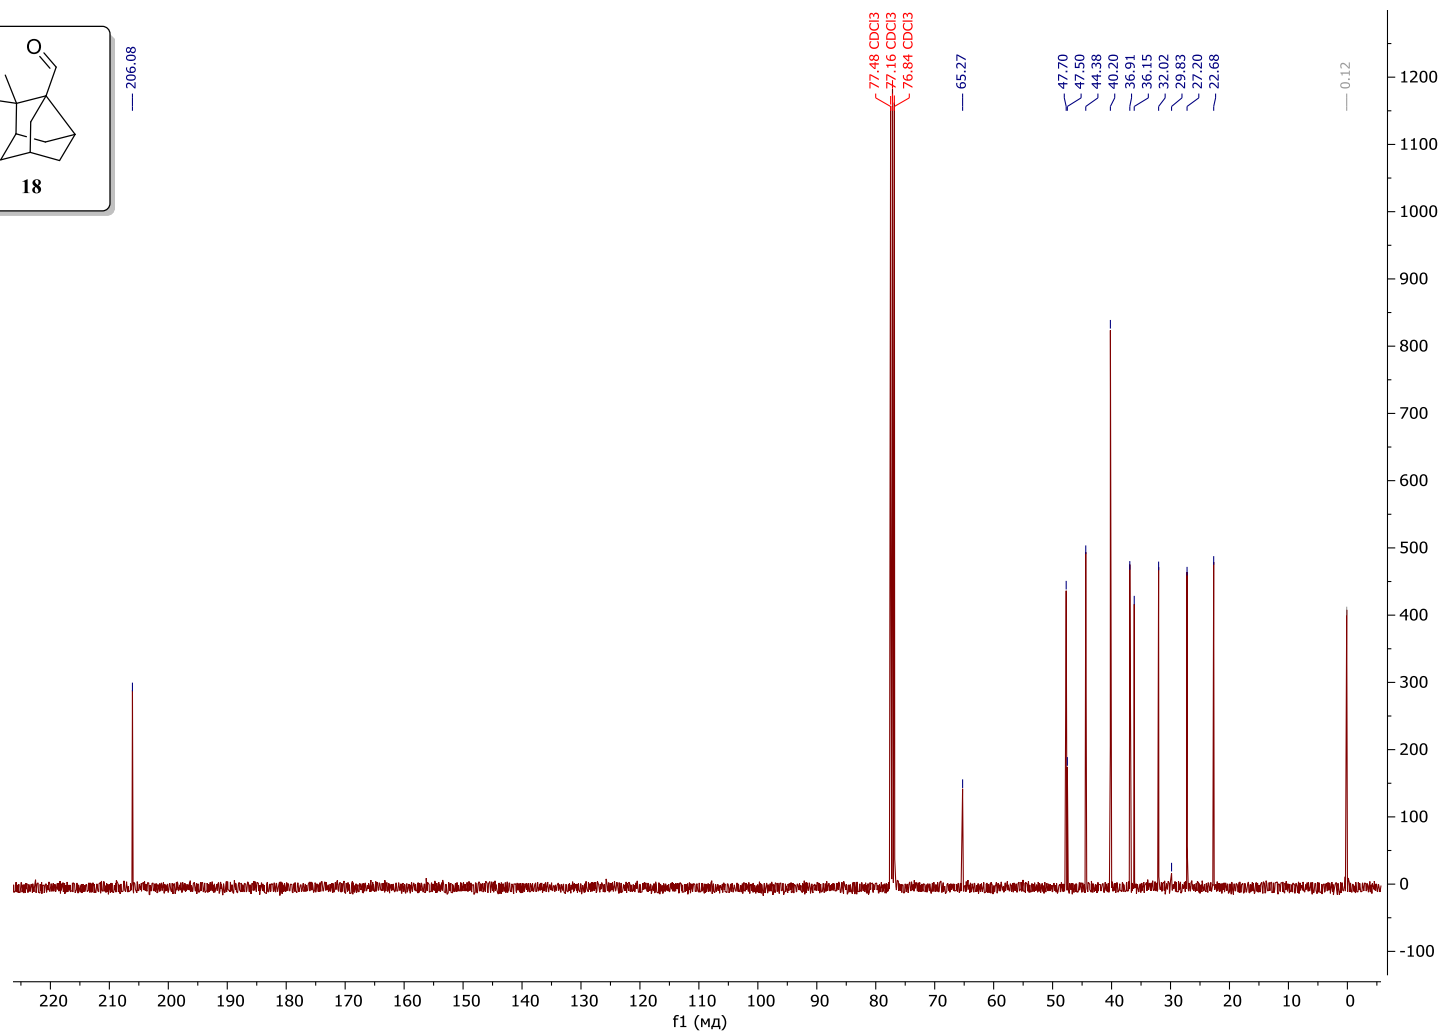

# Compound 19

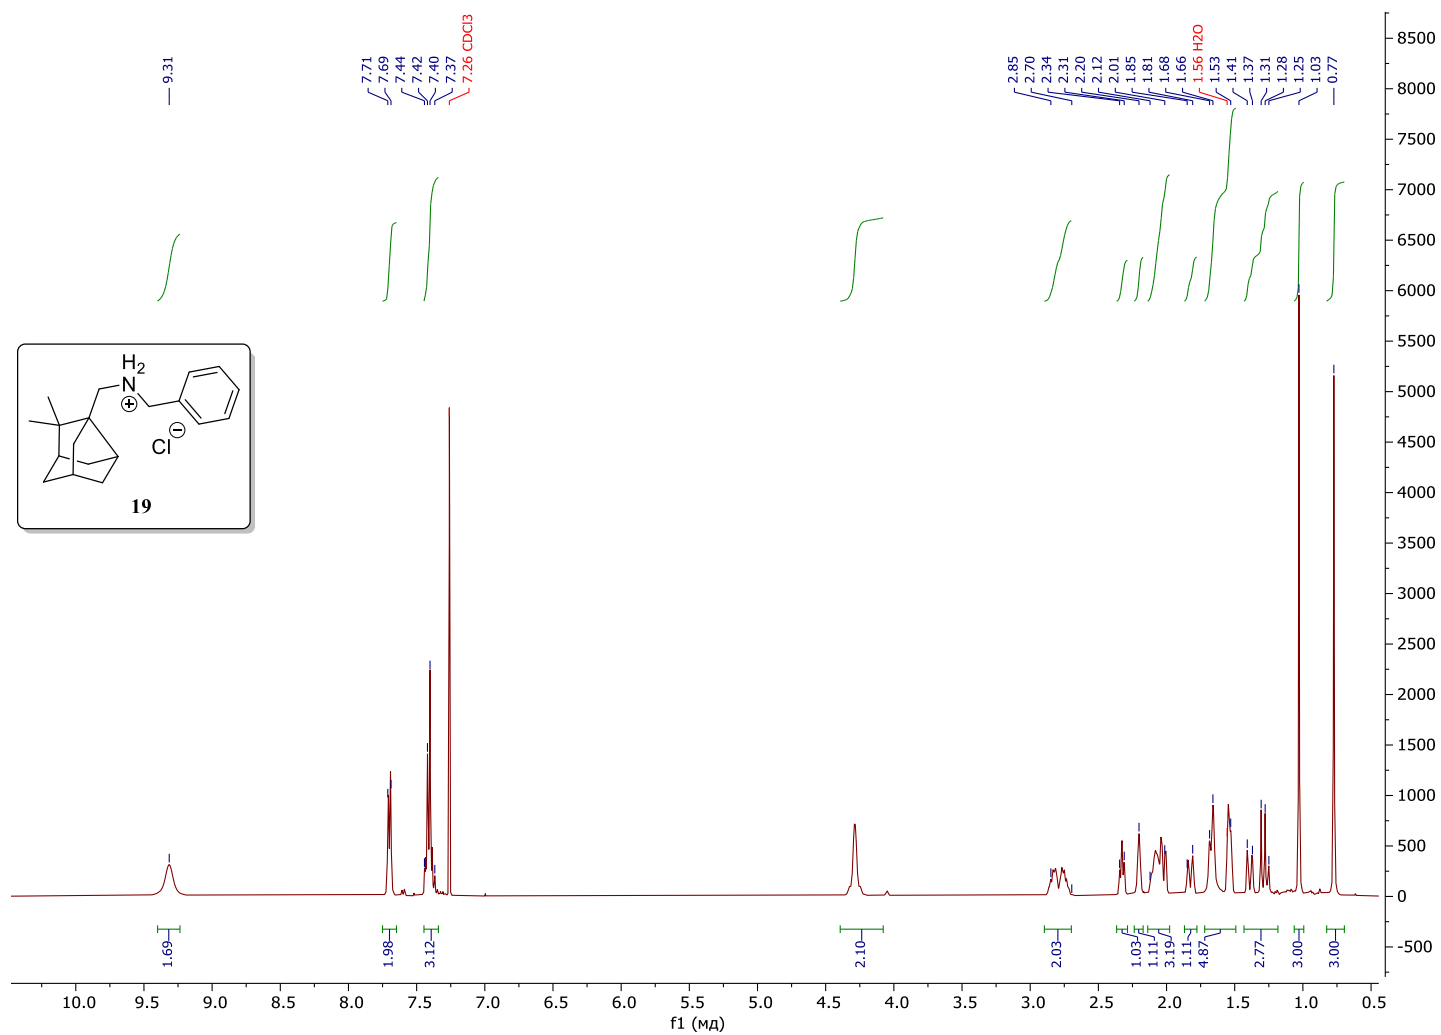

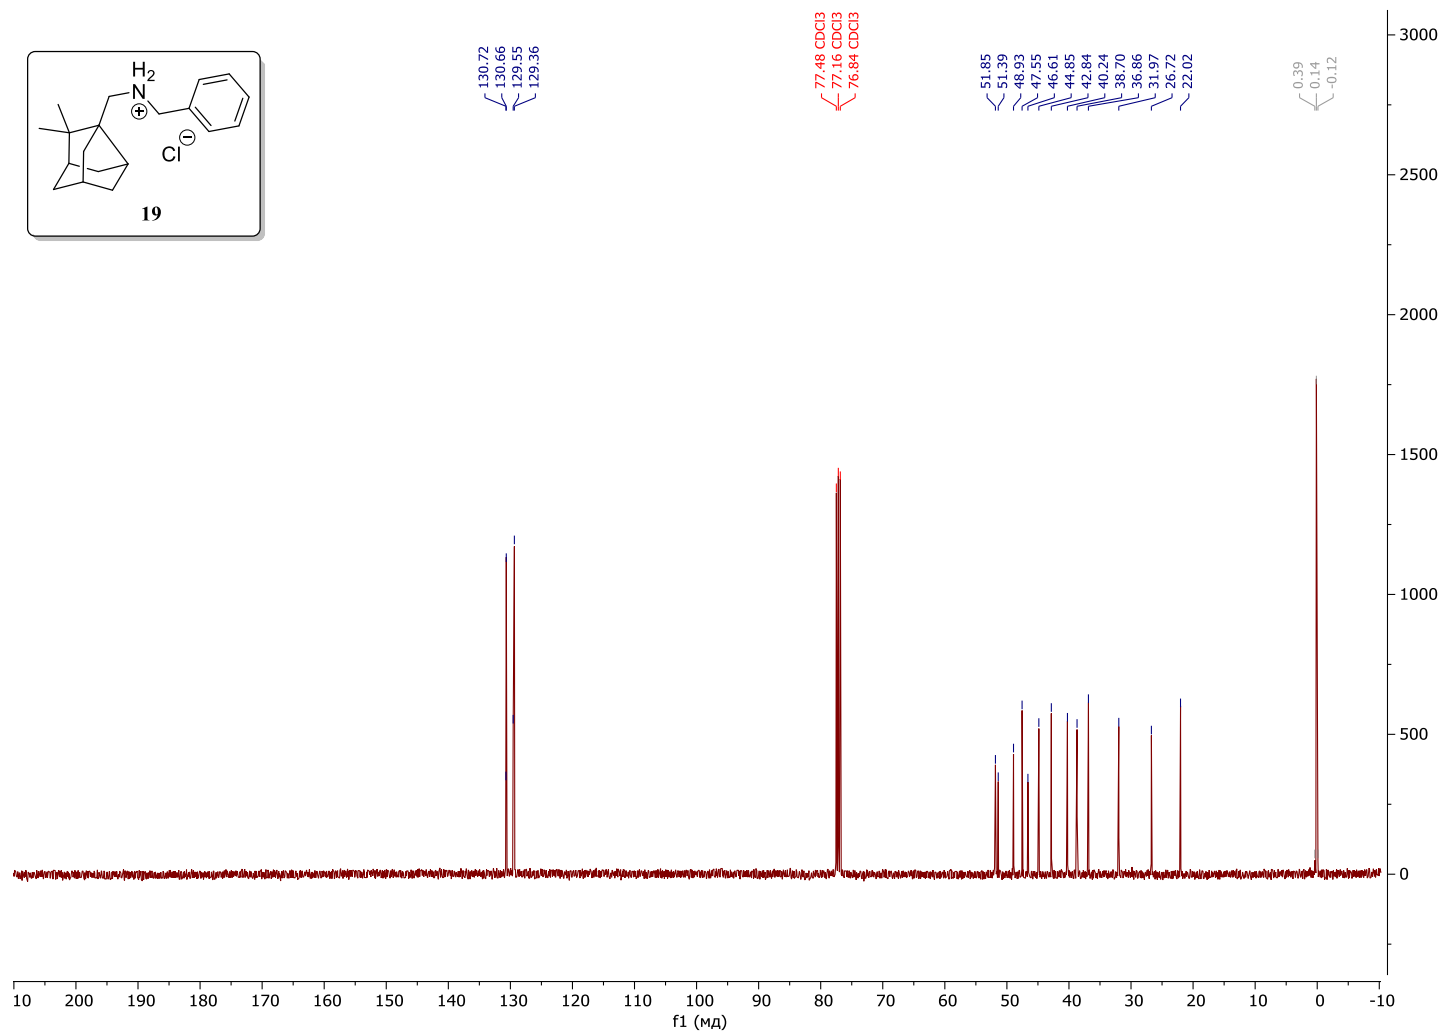



## Compound 23

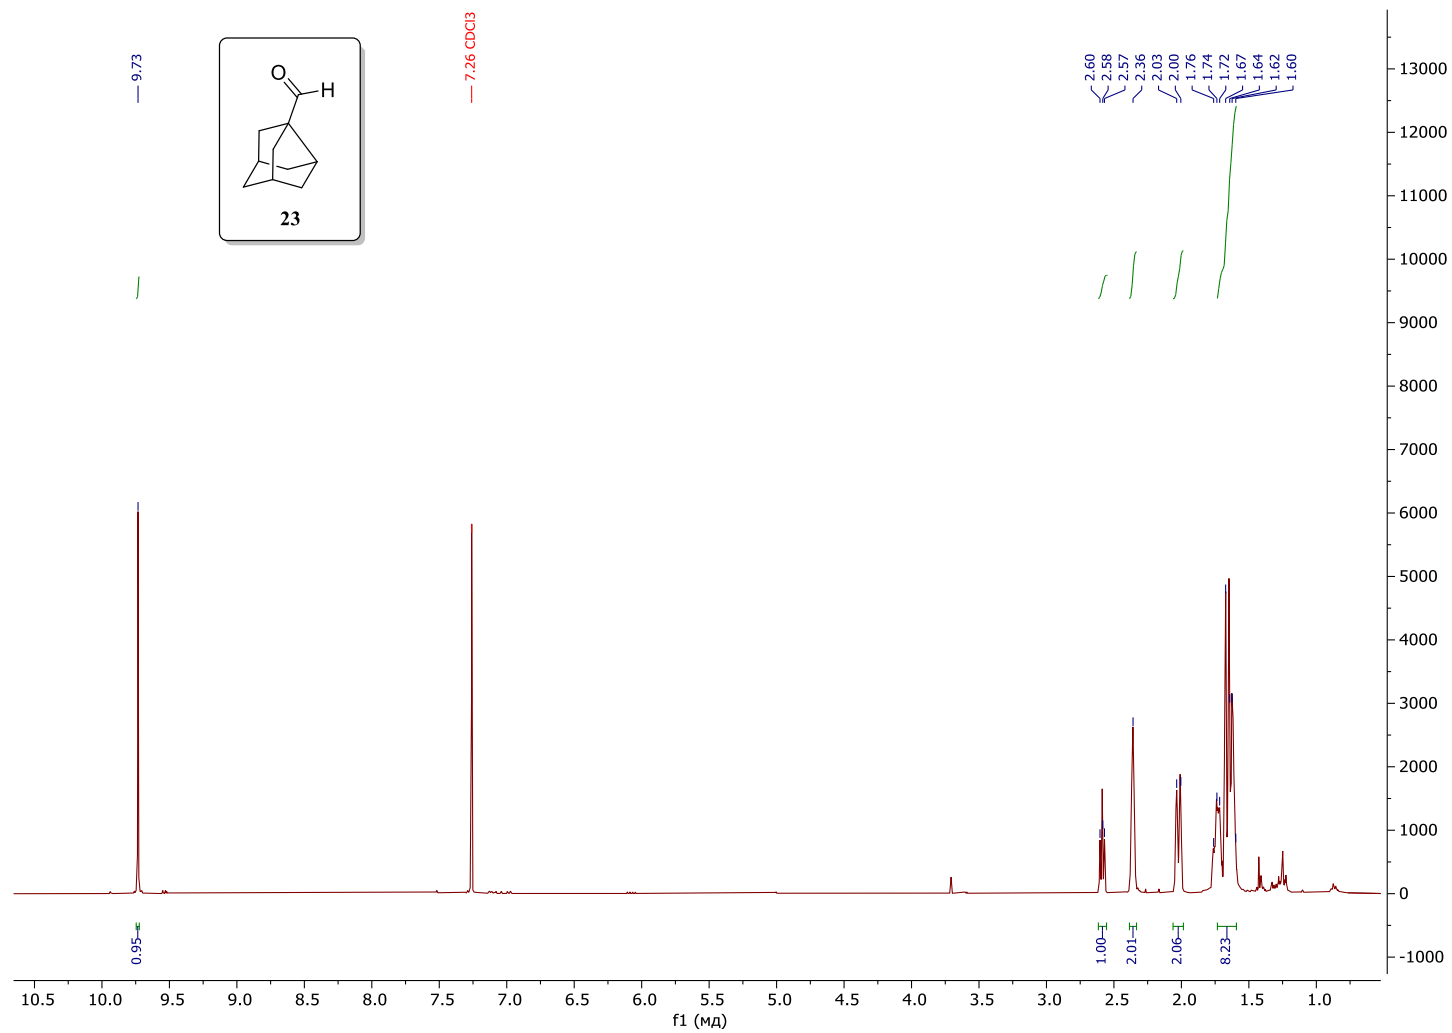

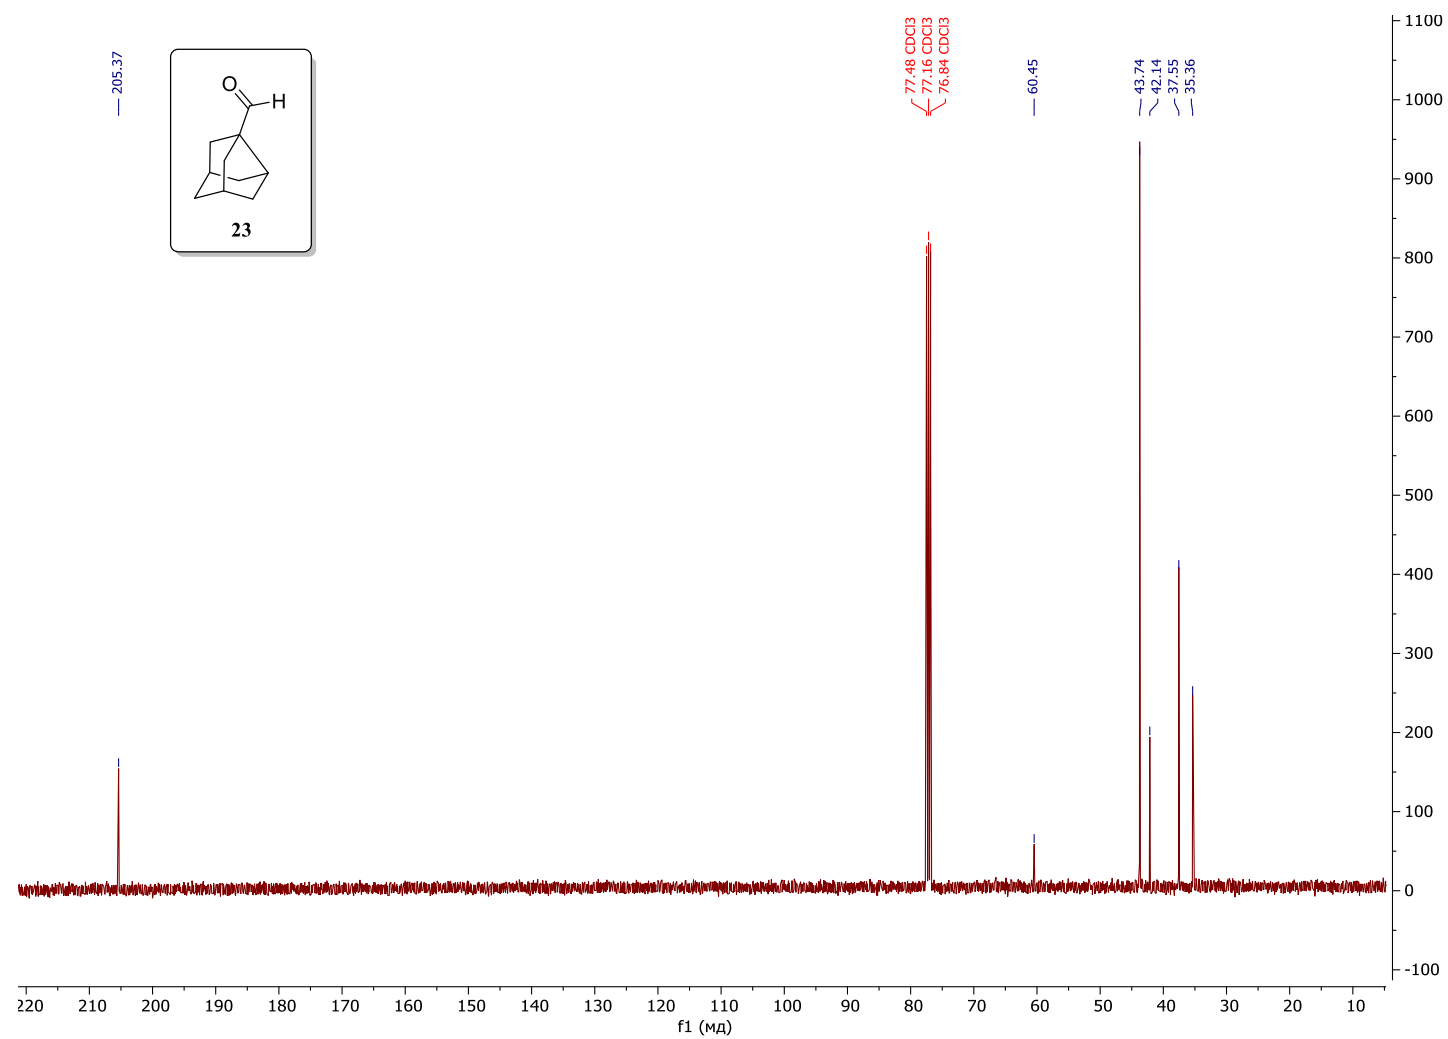

# Compound 24

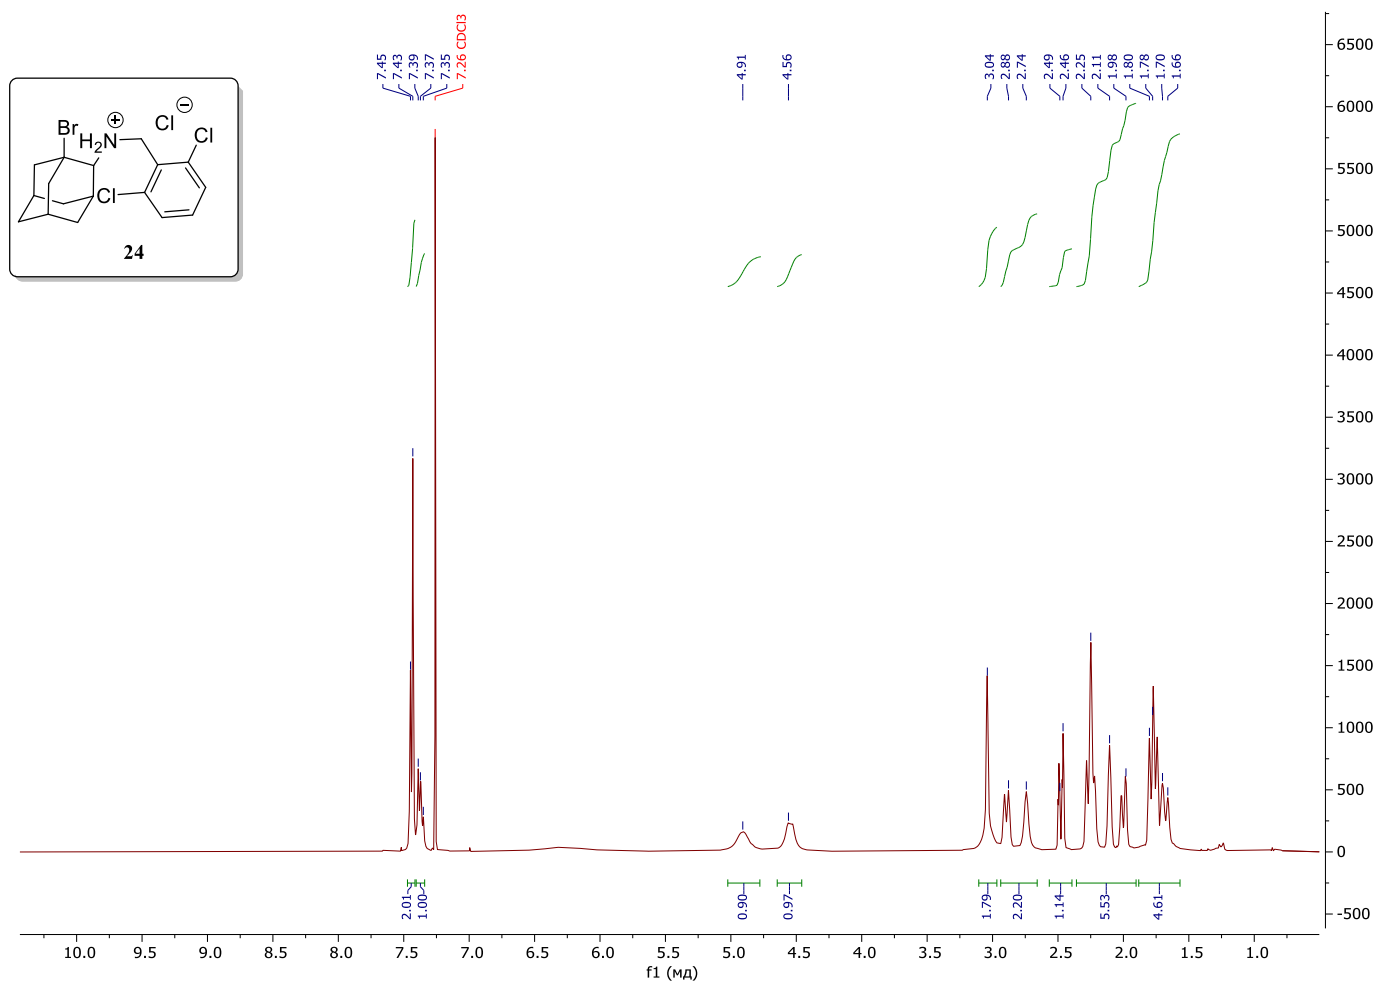

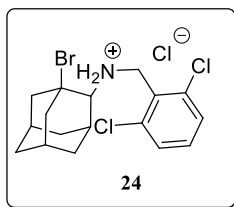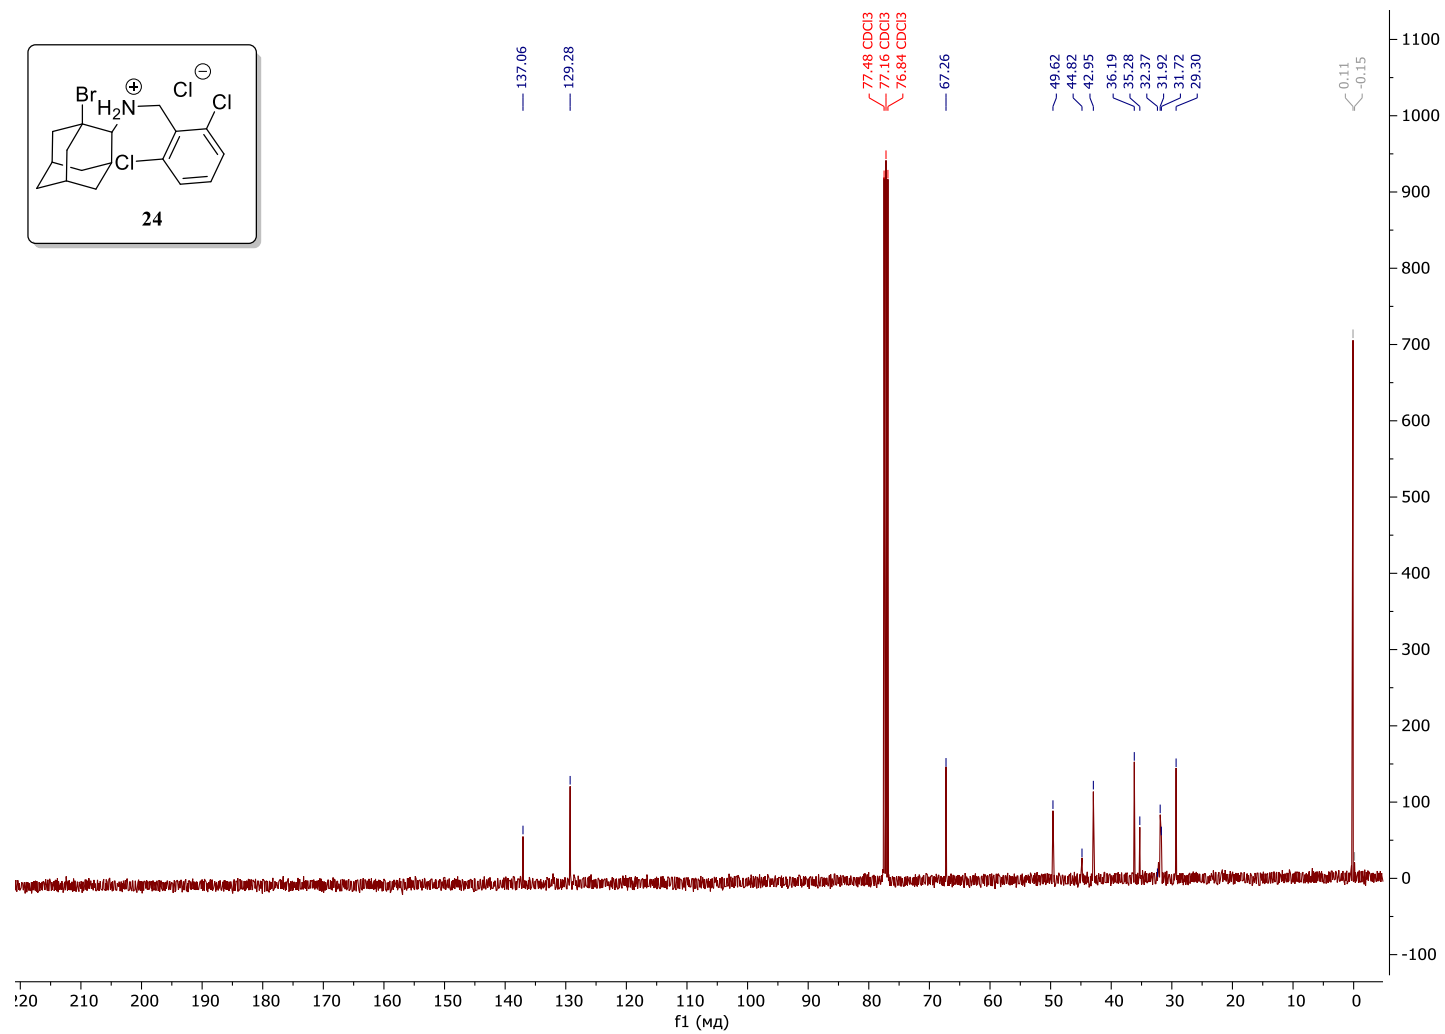

# Compound 25

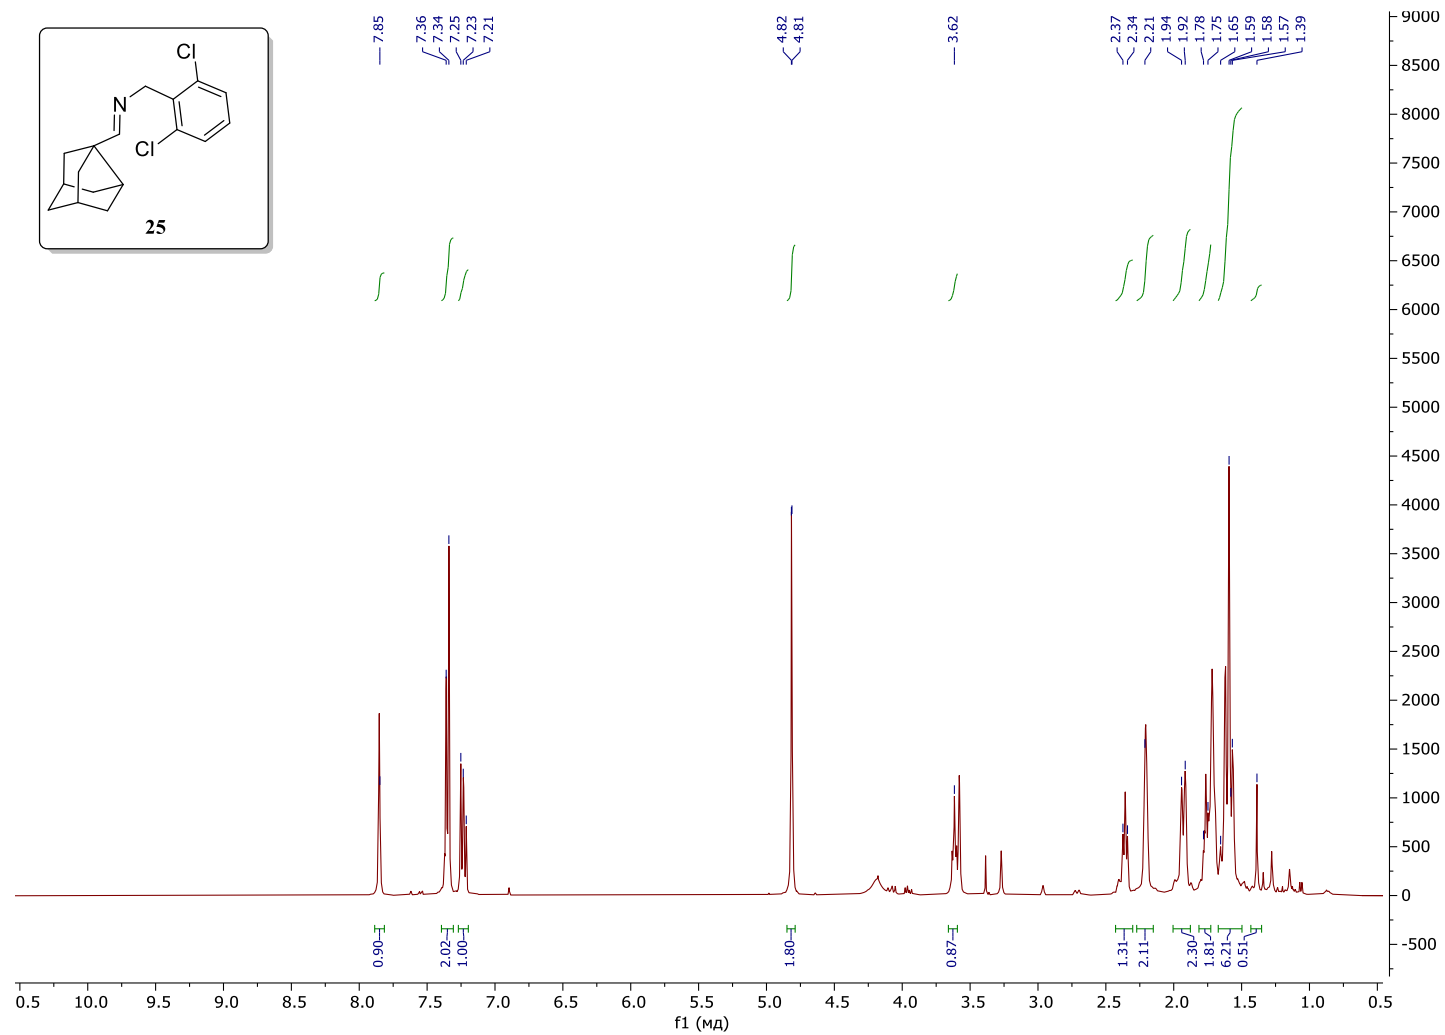

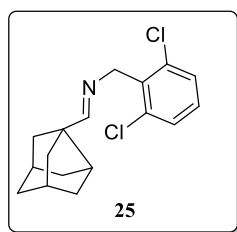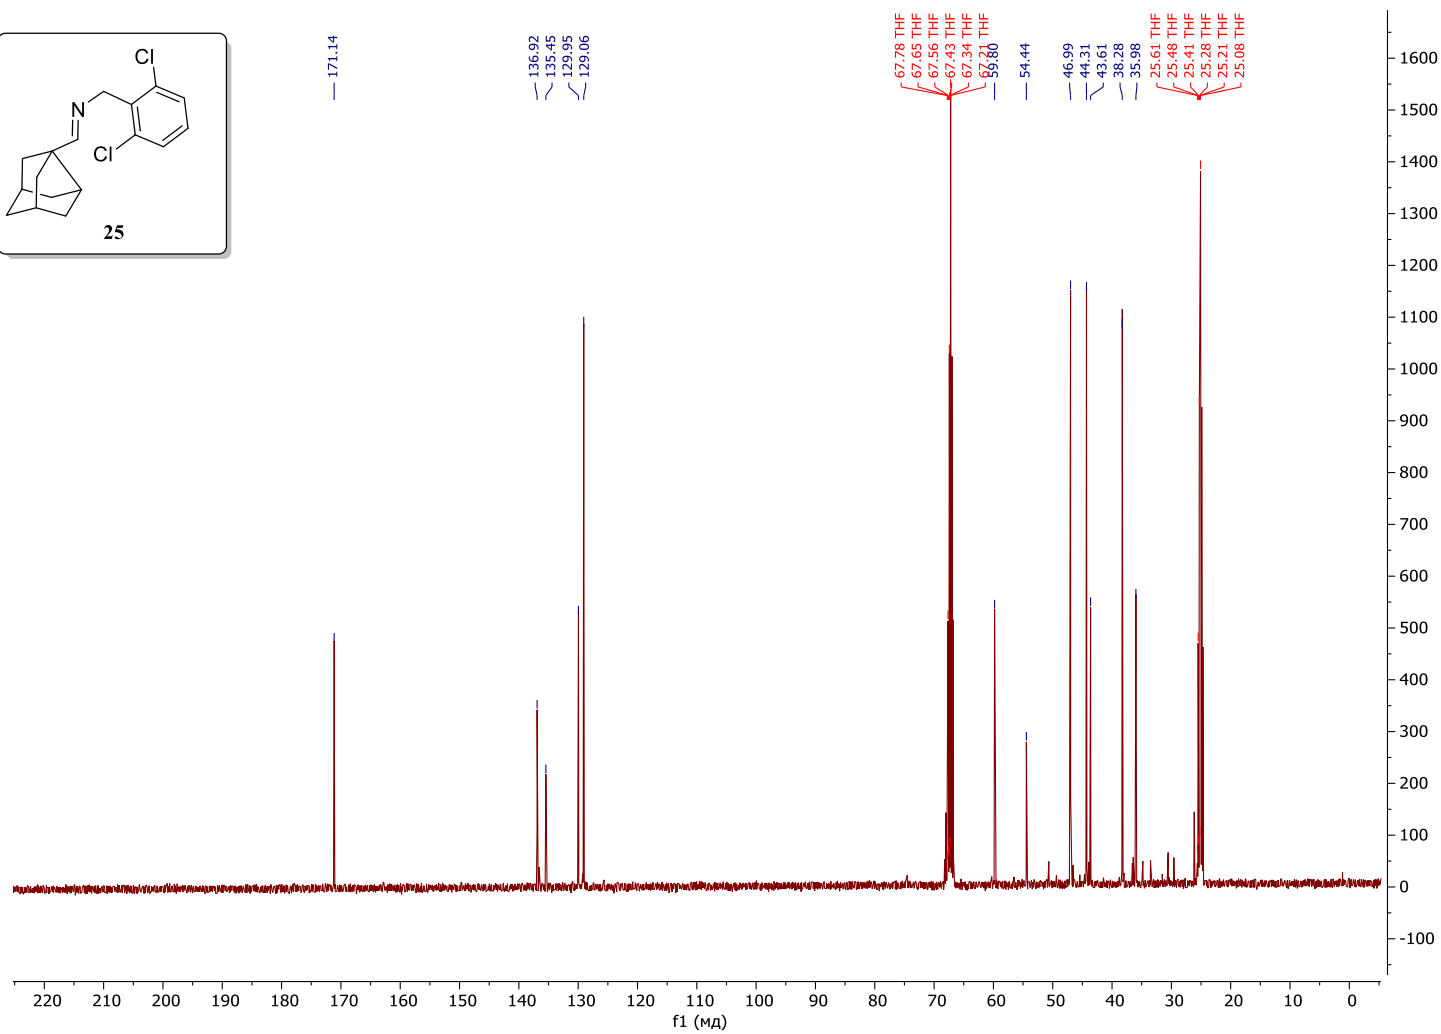

## 5. DFT analyses

### Geometric Structures and Electronic energies (Hartree)

**IntA<sup>+</sup>**

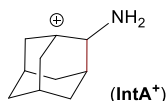

Temperature 298.150 Kelvin. Pressure 1.00000 Atm.

Zero-point correction= 0.247133 (Hartree/Particle)

Thermal correction to Energy= 0.255753

Thermal correction to Enthalpy= 0.256697

Thermal correction to Gibbs Free Energy= 0.214776

Sum of electronic and zero-point Energies= -445.100782

Sum of electronic and thermal Energies= -445.092162

Sum of electronic and thermal Enthalpies= -445.091218

Sum of electronic and thermal Free Energies= -445.133139

Charge = 1 Multiplicity = 1

|   |              |              |              |
|---|--------------|--------------|--------------|
| 6 | -1.391571000 | -0.643739000 | -0.368024000 |
| 1 | -1.490529000 | -1.661280000 | -0.757837000 |
| 6 | -0.392324000 | 0.118170000  | -1.120040000 |
| 6 | -0.534880000 | -0.776452000 | 1.019077000  |
| 1 | -1.191250000 | -1.340963000 | 1.683494000  |
| 6 | 0.759789000  | -1.538576000 | 0.735696000  |
| 1 | 0.548995000  | -2.539163000 | 0.355486000  |
| 1 | 1.309864000  | -1.672441000 | 1.669059000  |

|   |              |              |              |
|---|--------------|--------------|--------------|
| 6 | 0.764580000  | -0.609641000 | -1.621924000 |
| 1 | 1.350241000  | -0.048576000 | -2.345474000 |
| 1 | 0.533940000  | -1.602952000 | -1.997781000 |
| 6 | 1.615225000  | -0.750017000 | -0.258386000 |
| 1 | 2.525659000  | -1.286204000 | -0.523150000 |
| 6 | 1.915058000  | 0.659756000  | 0.254308000  |
| 1 | 2.507881000  | 0.596704000  | 1.169482000  |
| 1 | 2.517972000  | 1.213536000  | -0.466846000 |
| 6 | -0.240693000 | 1.528370000  | -0.843786000 |
| 1 | -1.169678000 | 2.043721000  | -0.626525000 |
| 1 | 0.373842000  | 2.061505000  | -1.563248000 |
| 6 | -0.253066000 | 0.628667000  | 1.554207000  |
| 1 | -1.179606000 | 1.162375000  | 1.754637000  |
| 1 | 0.280495000  | 0.548743000  | 2.503904000  |
| 6 | 0.607711000  | 1.394046000  | 0.550723000  |
| 1 | 0.780912000  | 2.422741000  | 0.864219000  |
| 7 | -2.630853000 | 0.051269000  | -0.116647000 |
| 1 | -3.159360000 | -0.391744000 | 0.624482000  |
| 1 | -3.222377000 | 0.071615000  | -0.938483000 |

**Int1<sup>+</sup>**

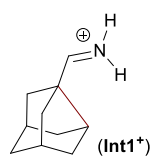

Temperature 298.150 Kelvin. Pressure 1.00000 Atm.

Zero-point correction= 0.248560 (Hartree/Particle)



|                                              |             |
|----------------------------------------------|-------------|
| Thermal correction to Energy=                | 0.257231    |
| Thermal correction to Enthalpy=              | 0.258176    |
| Thermal correction to Gibbs Free Energy=     | 0.214975    |
| Sum of electronic and zero-point Energies=   | -445.125833 |
| Sum of electronic and thermal Energies=      | -445.117161 |
| Sum of electronic and thermal Enthalpies=    | -445.116217 |
| Sum of electronic and thermal Free Energies= | -445.159418 |

Charge = 1 Multiplicity = 1

|   |              |              |              |
|---|--------------|--------------|--------------|
| 6 | -0.029621000 | 1.252576000  | -1.017267000 |
| 1 | -0.594320000 | 2.166201000  | -0.826598000 |
| 1 | 0.061286000  | 1.120741000  | -2.093887000 |
| 6 | -0.695000000 | -0.000009000 | -0.329523000 |
| 6 | 1.302452000  | 1.279519000  | -0.255140000 |
| 1 | 1.881838000  | 2.172337000  | -0.487205000 |
| 6 | 0.785019000  | 1.247859000  | 1.190313000  |
| 1 | 0.225373000  | 2.157220000  | 1.416413000  |
| 1 | 1.570477000  | 1.150329000  | 1.937597000  |
| 6 | -0.120611000 | 0.000005000  | 1.150889000  |
| 1 | -0.870823000 | 0.000005000  | 1.943840000  |
| 6 | 0.785032000  | -1.247841000 | 1.190329000  |
| 1 | 1.570489000  | -1.150292000 | 1.937612000  |
| 1 | 0.225396000  | -2.157204000 | 1.416441000  |
| 6 | -0.029608000 | -1.252594000 | -1.017251000 |
| 1 | 0.061298000  | -1.120772000 | -2.093872000 |

|   |              |              |              |
|---|--------------|--------------|--------------|
| 1 | -0.594298000 | -2.166223000 | -0.826570000 |
| 6 | 2.116329000  | 0.000005000  | -0.561669000 |
| 1 | 2.424851000  | 0.000000000  | -1.609111000 |
| 1 | 3.030535000  | 0.000014000  | 0.034012000  |
| 6 | 1.302465000  | -1.279514000 | -0.255123000 |
| 1 | 1.881861000  | -2.172328000 | -0.487176000 |
| 6 | -2.129598000 | -0.000014000 | -0.549057000 |
| 1 | -2.493923000 | -0.000032000 | -1.573646000 |
| 7 | -3.040359000 | 0.000004000  | 0.364428000  |
| 1 | -2.792480000 | 0.000020000  | 1.346982000  |
| 1 | -4.026201000 | 0.000001000  | 0.135169000  |

TS

Temperature 298.150 Kelvin. Pressure 1.00000 Atm.

Zero-point correction= 0.246238 (Hartree/Particle)

Thermal correction to Energy= 0.254558

Thermal correction to Enthalpy= 0.255502

Thermal correction to Gibbs Free Energy= 0.214064

Sum of electronic and zero-point Energies= -445.099699

Sum of electronic and thermal Energies= -445.091380

Sum of electronic and thermal Enthalpies= -445.090435

Sum of electronic and thermal Free Energies= -445.131873

Charge = 1 Multiplicity = 1

|   |              |              |              |
|---|--------------|--------------|--------------|
| 6 | -1.497953000 | -0.677923000 | -0.289466000 |
|---|--------------|--------------|--------------|

|   |              |              |              |
|---|--------------|--------------|--------------|
| 1 | -1.594207000 | -1.752258000 | -0.435512000 |
| 6 | -0.477408000 | -0.063960000 | -1.068010000 |
| 6 | -0.436716000 | -0.594761000 | 1.143224000  |
| 1 | -1.133044000 | -1.049417000 | 1.845911000  |
| 6 | 0.818000000  | -1.417697000 | 0.922443000  |
| 1 | 0.577398000  | -2.460769000 | 0.711567000  |
| 1 | 1.399948000  | -1.416282000 | 1.847420000  |
| 6 | 0.680208000  | -0.871233000 | -1.489497000 |
| 1 | 1.187203000  | -0.428943000 | -2.344810000 |
| 1 | 0.428510000  | -1.905863000 | -1.708903000 |
| 6 | 1.626335000  | -0.798413000 | -0.218463000 |
| 1 | 2.528898000  | -1.368730000 | -0.433607000 |
| 6 | 1.952731000  | 0.673514000  | 0.068123000  |
| 1 | 2.592778000  | 0.742329000  | 0.949795000  |
| 1 | 2.519768000  | 1.104682000  | -0.758438000 |
| 6 | -0.257523000 | 1.384535000  | -0.997013000 |
| 1 | -1.156953000 | 1.972785000  | -0.844563000 |
| 1 | 0.300767000  | 1.762502000  | -1.850160000 |
| 6 | -0.154780000 | 0.863667000  | 1.449125000  |
| 1 | -1.083712000 | 1.409427000  | 1.603602000  |
| 1 | 0.404478000  | 0.916408000  | 2.386651000  |
| 6 | 0.664807000  | 1.470971000  | 0.310161000  |
| 1 | 0.878940000  | 2.525405000  | 0.479991000  |
| 7 | -2.696220000 | 0.019688000  | -0.004161000 |
| 1 | -3.425116000 | -0.572439000 | 0.364537000  |
| 1 | -3.058320000 | 0.571153000  | -0.768119000 |

## 6. Crystallographic data collection and refinement details

The X-ray experimental data for **7** (73b-200) and **10I1** (rh82) were acquired on Bruker D8 VENTURE Kappa Duo PHOTON III by  $\text{I}\mu\text{S}$  micro-focus sealed tube either with  $\text{MoK}\alpha$  ( $\lambda = 0.71073 \text{ \AA}$ ) for **7** or  $\text{CuK}\alpha$  ( $\lambda = 1.54178 \text{ \AA}$ ) for **10I1** radiation at a low temperature. The structures were solved by direct methods (XT39a)<sup>39a</sup> and refined by full matrix least squares based on F2 (SHELXL201839b).<sup>39b</sup> The hydrogen atoms on carbon were fixed into idealized positions (riding model) and assigned temperature factors either  $\text{Hiso}(\text{H}) = 1.2 \text{ Ueq}(\text{pivot atom})$  or  $\text{Hiso}(\text{H}) = 1.5 \text{ Ueq}(\text{pivot atom})$  for methyl moiety. The hydrogens on N and O atoms were found on difference Fourier maps and refined under rigid-body assumption.

Crystal data for **7**:  $\text{C}_{11}\text{H}_{20}\text{N}\cdot\text{Cl}\cdot\text{H}_2\text{O}$ ,  $M_r = 219.74$ , Monoclinic, P21/c (No 14),  $a = 16.6281(13) \text{ \AA}$ ,  $b = 6.4734(4) \text{ \AA}$ ,  $c = 11.5542(9) \text{ \AA}$ ,  $\beta = 103.171(3)^\circ$ ,  $V = 1210.98(15) \text{ \AA}^3$ ,  $Z = 4$ ,  $D_x = 1.205 \text{ Mg m}^{-3}$ , colourless plate of dimensions  $0.50 \times 0.44 \times 0.04 \text{ mm}$ , temperature of the crystal 200K, multi-scan absorption correction ( $\mu = 0.29 \text{ mm}^{-1}$ )  $T_{\min} = 0.88$ ,  $T_{\max} = 0.99$ ; a total of 10958 measured reflections ( $\theta_{\max} = 27.5^\circ$ ), from which 2773 were unique ( $R_{\text{int}} = 0.029$ ) and 2180 observed according to the  $I > 2\sigma(I)$  criterion. The refinement converged ( $\Delta/\sigma_{\max} \leq 0.001$ ) to  $R = 0.045$  for observed reflections and  $wR(F_2) = 0.123$ ,  $\text{GOF} = 1.04$  for 128 parameters and all 2773 reflections. The final difference map displayed no peaks of chemical significance ( $\Delta\rho_{\max} = 0.46$ ,  $\Delta\rho_{\min} -0.39 \text{ e.\AA}^{-3}$ ).

The temperature of 200K was chosen for the measurement due to phase transition of the structure at lower temperature. At 120K the crystal exhibits splitting of diffractions accompany with change of lattice symmetry to triclinic one. The structure was solved in P -1 space group with two symmetrically independent molecules in the unit cell. Except smaller displacement parameters, all other geometric parameters (intra- and inter- atomic distances and angles) compares well with high temperature phase, therefore the structure at 120K was included only in the form of cif-file deposited into CSD with ccdc number 2194852.

Crystal data for **10I1**:  $\text{C}_{15}\text{H}_{25}\text{NO}_2$ ,  $M_r = 251.36$ , Monoclinic, P21/c (No 14),  $a = 12.2381(5) \text{ \AA}$ ,  $b = 11.7529(6) \text{ \AA}$ ,  $c = 10.0683(4) \text{ \AA}$ ,  $V = 1398.00(11) \text{ \AA}^3$ ,  $Z = 4$ ,  $D_x = 1.194 \text{ Mg m}^{-3}$ , colourless needle of dimensions  $0.28 \times 0.05 \times 0.04 \text{ mm}$ , temperature of the sample 120K, multi-scan absorption correction ( $\mu = 0.61 \text{ mm}^{-1}$ )  $T_{\min} = 0.85$ ,  $T_{\max} = 0.97$ ; a total of 31666 measured reflections ( $\theta_{\max} = 66.6^\circ$ ), from which 4600 were unique ( $R_{\text{int}} = 0.034$ ) and 3745 observed according to the  $I > 2\sigma(I)$  criterion. The refinement converged ( $\Delta/\sigma_{\max} \leq 0.004$ ) to  $R = 0.046$  for observed reflections and  $wR(F_2) = 0.109$ ,  $\text{GOF} = 1.05$  for 267 parameters and all 4600 reflections. The final difference map displayed no peaks of chemical significance ( $\Delta\rho_{\max} = 0.29$ ,  $\Delta\rho_{\min} -0.21 \text{ e.\AA}^{-3}$ ). The measured crystal was refined as non-merohedral twin with the domains ratio 0.67:0.33. The influence of real structure of the crystal of **10I1** on diffraction

pattern is not expressed only by twinning but also by disorder by major part of the molecule of 10i1. However the second position is occupied only by 12% of molecules suggesting the idea, that the driving force of disorder is rather the entropy instead equality of minima of energy for both orientations.

X-ray crystallographic data have been deposited with the Cambridge Crystallographic Data Centre (CCDC) under deposition numbers 2194850 and 2194851 for **7** and 10i1, respectively and can be obtained free of charge from the Centre via its website ([www.ccdc.cam.ac.uk/getstructures](http://www.ccdc.cam.ac.uk/getstructures)).

#### References:

<sup>39a</sup> SHELXT: Sheldrick, G.M. (2015). *Acta Cryst.* A71, 3-8.

<sup>39</sup> SHELXL: Sheldrick, G.M. (2015). *Acta Cryst.* C71, 3-8.

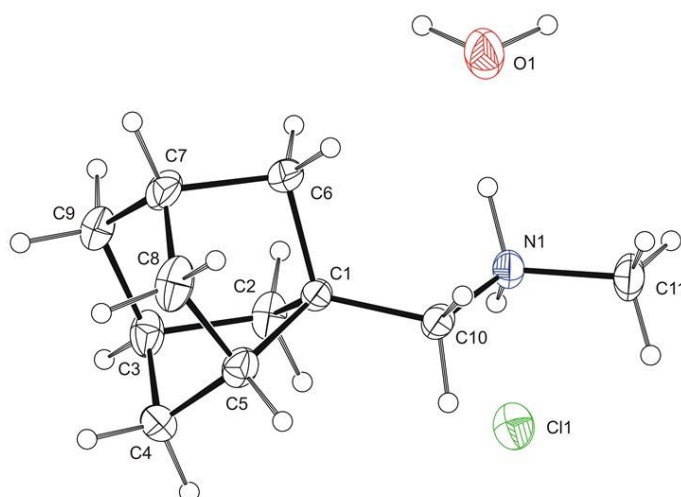

Fig.1 View on the molecule of **7** with atom numbering schema. The displacement ellipsoids are drawn on 30% probability level.

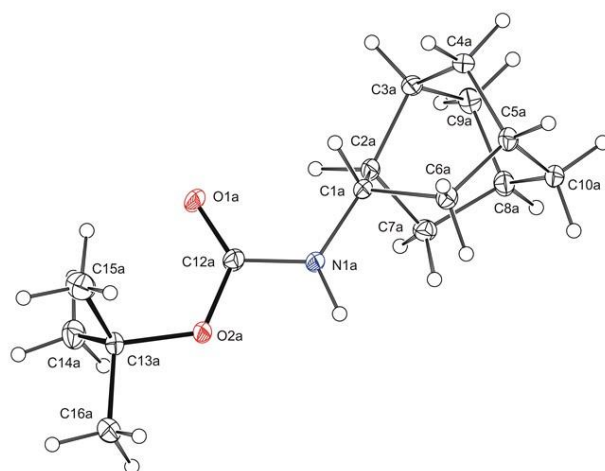

Fig.2 View on the molecule of **10II** with atom numbering schema. The displacement ellipsoids are drawn on 30% probability level. The second positions of disordered atoms are omitted for clarity.
